# Supplementary material for: Regio- and enantioselective remote hydroarylation using a ligand-relay strategy
Source: PubMed Central journal article supplement (PMC9072428; doi:10.1038/s41467-022-30006-2), 2022-05-05
Supplement: 41467_2022_30006_MOESM1_ESM.pdf [file 41467_2022_30006_MOESM1_ESM.pdf]

## Supplementary Information

### Regio- and enantioselective remote hydroarylation using a ligand-relay strategy

Yuli He<sup>1</sup>, Jiawei Ma<sup>1</sup>, Huayue Song<sup>1</sup>, Yao Zhang<sup>1</sup>, Yong Liang<sup>1,\*</sup>, You Wang<sup>1,\*</sup>, and  
Shaolin Zhu<sup>1,2,\*</sup>

<sup>1</sup>*State Key Laboratory of Coordination Chemistry, Jiangsu Key Laboratory of Advanced Organic Materials, Chemistry and Biomedicine Innovation Center (ChemBIC), School of Chemistry and Chemical Engineering, Nanjing University, Nanjing, 210093, China*

<sup>2</sup>*School of Chemistry and Chemical Engineering, Henan Normal University, Xinxiang, 453007, China*

\*email: yongliang@nju.edu.cn; wangyou@nju.edu.cn; shaolinzhu@nju.edu.cn

## 1. Supplementary Notes

Solvents were either purified and dried by passage through alumina and Q5 reactant-packed columns on a solvent purification system or bought from the commercial sources and transferred to the glovebox without exposure to air. Other commercial reagents were purchased from Sigma-Aldrich, Acros, Alfa Aesar, TCI, J&K, Energy Chemical, Bide Pharmatech Ltd. and were used as received. Flash chromatography was either performed using glass columns with *SiliaFlash*® P60 (SiliCycle, 230-400 mesh), or on pre-packed *Biotage*® SNAP columns using a Biotage Isolera Automated Flash Chromatography System.

**NiCl<sub>2</sub>.dme:** (CAS 29046-78-4) was purchased from Strem Chemical;

**4-Phenyl-1-butene:** (CAS 768-56-9) was purchased from TCI and stored under nitrogen at -20 °C in glove box;

**2,9-Dimethyl-10-phenanthroline:** (Neocuproine, CAS 484-11-7) was purchased from Adamas-beta®;

**DMMS:** (Methyldimethoxysilane, CAS 16881-77-9) was purchased from TCI and stored under nitrogen at -20 °C in glove box;

**KF:** (*White powder*, CAS 7789-23-3) was purchased from Alfa Aesar (Stock No. 42216);

**DMPU:** [1,3-Dimethyl-3,4,5,6-tetrahydro-2(1*H*)-pyrimidinone, CAS 7226-23-5] was purchased from TCI and stored under nitrogen in glove box;

All compounds (starting materials and products) were characterized by <sup>1</sup>H NMR, <sup>13</sup>C NMR, IR spectroscopy, melting point (where applicable), and high-resolution mass spectrometry. <sup>1</sup>H NMR spectra were recorded on Bruker 500 M MHz spectrometer and are referenced relative to residual CDCl<sub>3</sub> proton signals at δ 7.26 ppm. <sup>19</sup>F NMR spectra were recorded on a Bruker 500 MHz spectrometer and are referenced to CFCI<sub>3</sub> (δ 0.0 ppm). Data for <sup>1</sup>H and <sup>19</sup>F NMR are reported as follows: chemical shift (δ ppm), multiplicity (s = singlet, d = doublet, t = triplet, q = quartet, m = multiplet, ap = apparent), integration, and coupling constant (Hz). <sup>13</sup>C NMR spectra were recorded on a Bruker 500 MHz spectrometer and are referenced to CDCl<sub>3</sub> at δ 77.16 ppm. The <sup>13</sup>C NMR spectra were obtained with <sup>1</sup>H decoupling. Data for <sup>13</sup>C NMR are reported in terms of chemical

shift and multiplicity where appropriate. IR spectra were obtained on a Bruker Alpha and was reported in terms of frequency of absorption ( $\text{cm}^{-1}$ ). GC analyses were performed on an Agilent 8890 gas chromatograph with an FID detector using a J&W DB-1 column (10 m, 0.1 mm I.D.). High Resolution Mass spectra were obtained on a Bruker Daltonics, Inc. APEXIII 7.0 TESLA FTMS instrument (ESI) or Atmospheric Pressure Chemical Ionization (ESI) mode. High pressure liquid chromatography (HPLC) was performed on Agilent 1260 Series chromatographs using Daicel Chiralcel columns (250 mm). Optical rotations were measured on a S3 Rudolph Research Analytical Autopol VI automatic polarimeter using a 50 mm pathlength cell at 589 nm with  $[\alpha]_D$  values reported in degrees; concentration (c) is in g/100 mL. Melting points (m.p.) were obtained on a Mel-Temp capillary melting point apparatus. The powder X-ray diffraction pattern (PXRD) measurements were carried out on a Philips X'pert MPD Pro X-ray diffractometer using Cu  $K\alpha$  radiation ( $\lambda = 0.15418$  nm), and the X-ray tube was operated at 40 kV and 40 mA at room temperature. Reactions were monitored by GC analysis and thin-layer chromatography (TLC) carried out on 0.25 mm Jiang you silica gel plates (HSGF254) using UV light as a visualizing agent.

## 2. Supplementary Methods

### 2.1. Regio- and Enantioselective C(sp<sup>3</sup>)-H Arylation

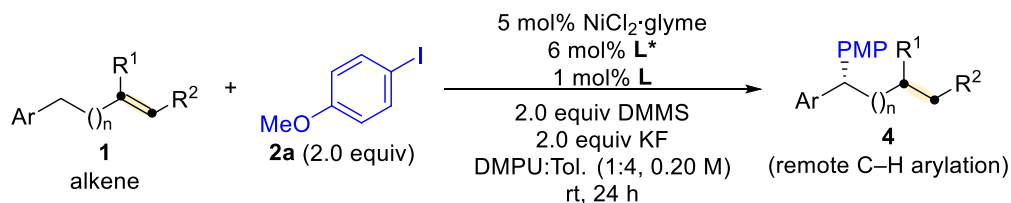

**General procedure (A) for the regio- and enantioselective C(sp<sup>3</sup>)-H arylation.** In a nitrogen-filled glove box, to an oven-dried 8 mL screw-cap vial equipped with a magnetic stir bar was added NiCl<sub>2</sub>-glyme (2.2 mg, 5.0 mol%), L\* (7.2 mg, 6.0 mol%), KF (23.2 mg, 2.0 equiv), L [0.42 mg, 0.2 mL (2.1 mg/ mL in toluene)], anhydrous toluene (0.60 mL) and DMPU (0.20 mL) were added, and the mixture was stirred for 15 min at room temperature, at which time 4-phenyl-1-butene (30  $\mu$ L, 0.20 mmol), 4-iodoanisole (94.0 mg, 0.40 mmol) and DMMS (49.3  $\mu$ L, 0.40 mmol) were added to the resulting mixture in this order. The tube was sealed with a teflon-lined screw cap, removed from the glove box and the reaction was stirred at rt (22~26  $^{\circ}$ C) for up to 24 h (the mixture was stirred at 750 rpm, ensuring that the base was uniformly suspended). After the reaction was complete, the reaction mixture was directly filtered through a short pad of silica gel [EtOAc in petroleum ether (PE)] to give the crude product. Dodecane (20  $\mu$ L) was added as an internal standard for GC analysis. The product was purified by chromatography on silica gel for each substrate. The yields reported are the average of at least two experiments, unless otherwise indicated. The enantiomeric excesses (% *ee*) were determined by HPLC analysis using chiral stationary phases.

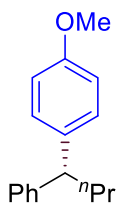

**(R)-1-Methoxy-4-(1-phenylpropyl)benzene** (Figure 3, **3a**)<sup>1,2</sup>. From **4-Iodoanisole** (94.0 mg, 0.40 mmol, 2.0 equiv), the title compound was prepared following the general

procedure **A** using NiCl<sub>2</sub>·glyme (2.2 mg, 5.0 mol%), **L\*** (7.2 mg, 6.0 mol%), **L** [0.42 mg, 0.2 mL (2.1 mg/mL in toluene)], KF (23.2 mg, 2.0 equiv), 4-phenyl-1-butene (**1a**) (30.0 μL, 0.20 mmol), DMMS (49.3 μL, 0.40 mmol), anhydrous toluene (0.60 mL) and DMPU (0.20 mL). The reaction mixture was stirred for 24 h at rt. The crude material was purified by flash column chromatography (0–1% EtOAc in PE) to provide the title compound as a colorless liquid in 84% yield (40.1 mg) with 99:1 rr.

**Rf** 0.2 (2% EtOAc in PE), UV;

**<sup>1</sup>H NMR** (500 MHz, CDCl<sub>3</sub>) δ 7.32 (t, *J* = 7.5 Hz, 2H), 7.28 (d, *J* = 8.2 Hz, 2H), 7.21 (d, *J* = 8.8 Hz, 3H), 6.88 (d, *J* = 8.7 Hz, 2H), 3.92 (t, *J* = 7.8 Hz, 1H), 3.81 (s, 3H), 2.05 (q, *J* = 7.8 Hz, 2H), 1.38 – 1.29 (m, 2H), 0.98 (t, *J* = 7.3 Hz, 3H);

**<sup>13</sup>C NMR** (126 MHz, CDCl<sub>3</sub>) δ 157.8, 145.8, 137.6, 128.8, 128.4, 127.8, 125.9, 113.8, 55.2, 50.2, 38.1, 21.2, 14.1;

**HRMS** (ESI) calcd. for C<sub>17</sub>H<sub>21</sub>O [M+H]<sup>+</sup> *m/z* 241.1587, found 241.1588;

**IR** (neat, cm<sup>-1</sup>) 2955, 1609, 1509, 1246, 697;

[α]<sub>D</sub><sup>20</sup> = -7.6 (*c* = 1.4, CHCl<sub>3</sub>); 95% *ee*;

**HPLC analysis** CHIRALCEL OJ-H column, 1% EtOH in hexane, 0.5 mL/min, 220 nm UV detector, *t*<sub>R</sub> (minor) = 23.6 min, *t*<sub>R</sub> (major) = 26.5 min.

**Note:**

From **1-Bromo-4-methoxybenzene (2a')** (74.8 mg, 0.40 mmol), the title compound was prepared following the general procedure **A**, and the crude material was purified by flash column chromatography (0–1% EtOAc in PE) to provide the title compound as a colorless liquid in 67% yield (38.9 mg) with 95% *ee* and >99:1 rr.

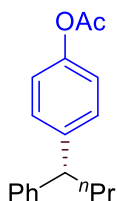

**(R)-4-(1-Phenylbutyl)phenyl acetate** (Figure 3, **3b**). From **4-Iodophenyl acetate** (104.8 mg, 0.40 mmol, 2.0 equiv), the title compound was prepared following the general procedure **A** using NiCl<sub>2</sub>·glyme (2.2 mg, 5.0 mol%), **L\*** (7.2 mg, 6.0 mol%), **L** [0.42 mg, 0.20 mL (2.1 mg/mL in toluene)], KF (23.2 mg, 2.0 equiv), 4-phenyl-1-butene (**1a**) (30.0

$\mu\text{L}$ , 0.20 mmol), DMMS (49.3  $\mu\text{L}$ , 0.40 mmol), anhydrous toluene (0.72 mL) and DMPU (0.20 mL). The reaction mixture was stirred for 24 h at rt. The crude material was purified by flash column chromatography (0–5% EtOAc in PE) to provide the title compound as a colorless liquid in 90% yield (48.3 mg) with 99:1 rr.

**Rf** 0.3 (5% EtOAc in PE), UV;

**$^1\text{H}$  NMR** (500 MHz,  $\text{CDCl}_3$ )  $\delta$  7.34 – 7.30 (m, 2H), 7.30 – 7.26 (m, 4H), 7.22 (t,  $J = 7.2$  Hz, 1H), 7.04 (d,  $J = 8.3$  Hz, 2H), 3.96 (t,  $J = 7.8$  Hz, 1H), 2.31 (s, 3H), 2.09 – 2.02 (m, 2H), 1.36 – 1.29 (m, 2H), 0.97 (t,  $J = 7.4$  Hz, 3H);

**$^{13}\text{C}$  NMR** (126 MHz,  $\text{CDCl}_3$ )  $\delta$  169.6, 148.8, 144.9, 142.9, 128.8, 128.5, 127.9, 126.2, 121.3, 50.5, 38.0, 21.2, 21.1, 14.1;

**HRMS** (ESI) calcd. for  $\text{C}_{18}\text{H}_{20}\text{NaO}_2$   $[\text{M}+\text{Na}]^+$   $m/z$  291.1356, found 291.1354;

**IR** (neat,  $\text{cm}^{-1}$ ) 2956, 1758, 1367, 1191, 698;

**$[\alpha]_{\text{D}}^{20}$**  =  $-4.2$  ( $c = 2.2$ ,  $\text{CHCl}_3$ ); 90% *ee*;

**HPLC analysis** CHIRALCEL OJ-H column, 1% *i*PrOH in hexane, 0.8 mL/min, 220 nm UV detector,  $t_{\text{R}}$  (minor) = 28.9 min,  $t_{\text{R}}$  (major) = 31.6 min.

**Note:**

From **4-Bromophenyl acetate (2b')** (85.6 mg, 0.40 mmol), the title compound was prepared following the general procedure **A**, and the crude material was purified by flash column chromatography (0–5% EtOAc in PE) to provide the title compound as a colorless liquid in 74% yield (39.5 mg) with 90% *ee* and 99:1 rr.

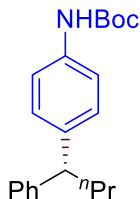

**tert-Butyl (R)-(4-(1-phenylbutyl)phenyl)carbamate** (Figure 3, **3c**). From **tert-Butyl (4-iodophenyl)carbamate** (127.7 mg, 0.40 mmol, 2.0 equiv), the title compound was prepared following the general procedure **A** using  $\text{NiCl}_2 \cdot \text{glyme}$  (2.2 mg, 5.0 mol%), **L\*** (7.2 mg, 6.0 mol%), **L** [0.42 mg, 0.20 mL (2.1 mg/mL in toluene)], KF (23.2 mg, 2.0 equiv), 4-phenyl-1-butene (**1a**) (30.0  $\mu\text{L}$ , 0.20 mmol), DMMS (49.3  $\mu\text{L}$ , 0.40 mmol), anhydrous toluene (0.60 mL) and DMPU (0.20 mL). The reaction mixture was stirred for

24 h at rt. The crude material was purified by flash column chromatography (0–3% EtOAc in PE) to provide the title compound as a colorless liquid in 73% yield (47.5 mg) with 98:2 rr.

**Rf** 0.3 (5% EtOAc in PE), UV;

**<sup>1</sup>H NMR** (500 MHz, CDCl<sub>3</sub>) δ 7.34 – 7.27 (m, 4H), 7.26 – 7.23 (m, 2H), 7.23 – 7.15 (m, 3H), 6.49 (s, 1H), 3.90 (t, *J* = 7.8 Hz, 1H), 2.03 (q, *J* = 7.7 Hz, 2H), 1.54 (s, 9H), 1.36 – 1.25 (m, 2H), 0.95 (t, *J* = 7.4 Hz, 3H);

**<sup>13</sup>C NMR** (126 MHz, CDCl<sub>3</sub>) δ 152.9, 145.5, 140.1, 136.3, 128.4, 128.4, 127.8, 125.9, 118.8, 80.4, 50.4, 37.9, 28.4, 21.1, 14.1;

**HRMS** (ESI) calcd. for C<sub>21</sub>H<sub>27</sub>NNaO<sub>2</sub> [M+Na]<sup>+</sup> *m/z* 348.1934, found 348.1933;

**IR** (neat, cm<sup>-1</sup>) 2929, 1699, 1519, 1154, 697;

[α]<sub>D</sub><sup>20</sup> = –8.2 (*c* = 2.2, CHCl<sub>3</sub>); 96% *ee*;

**HPLC analysis** CHIRALCEL OJ-H column, 1% <sup>i</sup>PrOH in hexane, 0.8 mL/min, 220 nm UV detector, *t*<sub>R</sub> (minor) = 38.7 min, *t*<sub>R</sub> (major) = 46.6 min.

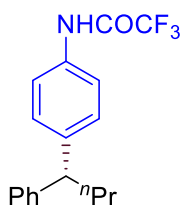

**(R)-2,2,2-Trifluoro-N-(4-(1-phenylbutyl)phenyl)acetamide** (Figure 3, **3d**). From **2,2,2-Trifluoro-N-(4-iodophenyl)acetamide** (126.0 mg, 0.40 mmol, 2.0 equiv), the title compound was prepared following the general procedure **A** using NiCl<sub>2</sub>·glyme (2.2 mg, 5.0 mol%), **L**\* (7.2 mg, 6.0 mol%), **L** [0.17 mg, 0.08 mL (2.1 mg/mL in toluene)], KF (23.2 mg, 2.0 equiv), 4-phenyl-1-butene (**1a**) (30.0 μL, 0.20 mmol), DMMS (49.3 μL, 0.40 mmol), anhydrous toluene (0.72 mL) and DMPU (0.20 mL). The reaction mixture was stirred for 24 h at rt. The crude material was purified by flash column chromatography (0–5% EtOAc in PE) to provide the title compound as a colorless liquid in 63% yield (39.4 mg) with 97:3 rr.

**Rf** 0.3 (5% EtOAc in PE), UV;

**<sup>1</sup>H NMR** (500 MHz, CDCl<sub>3</sub>) δ 8.00 (s, 1H), 7.50 (d, *J* = 8.3 Hz, 2H), 7.33 – 7.27 (m, 4H), 7.27 – 7.18 (m, 3H), 3.94 (t, *J* = 7.8 Hz, 1H), 2.11 – 1.99 (m, 2H), 1.36 – 1.25 (m, 3H), 0.96 (t, *J* = 7.4 Hz, 3H);

**<sup>13</sup>C NMR** (126 MHz, CDCl<sub>3</sub>) δ 154.8 (q, *J* = 37.2 Hz), 144.8, 143.8, 133.0, 128.8, 128.5, 127.8, 126.2, 120.6, 115.8 (q, *J* = 289.2 Hz), 50.5, 37.8, 21.1, 14.0;

**<sup>19</sup>F NMR** (471 MHz, CDCl<sub>3</sub>) δ -75.7;

**HRMS** (ESI) calcd. for C<sub>18</sub>H<sub>18</sub>F<sub>3</sub>NaO [M+Na]<sup>+</sup> *m/z* 344.1233, found 344.1234;

**IR** (neat, cm<sup>-1</sup>) 2958, 1702, 1151, 697;

**[α]<sub>D</sub><sup>20</sup>** = -9.5 (*c* = 1.1, CHCl<sub>3</sub>); 92% *ee*;

**HPLC analysis** CHIRALCEL AD-H column, 5% <sup>*i*</sup>PrOH in hexane, 0.5 mL/min, 220 nm UV detector, *t<sub>R</sub>* (minor) = 18.1 min, *t<sub>R</sub>* (major) = 19.2 min.

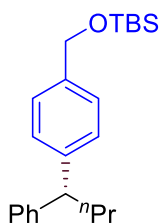

**(*R*)-tert-Butyldimethyl((4-(1-phenylbutyl)benzyl)oxy)silane** (Figure 3, **3e**). From *tert*-Butyl((4-iodobenzyl)oxy)dimethylsilane (139.2 mg, 0.40 mmol, 2.0 equiv), the title compound was prepared following the general procedure **A** using NiCl<sub>2</sub>·glyme (2.2 mg, 5.0 mol%), **L**\* (7.2 mg, 6.0 mol%), **L** [0.42 mg, 0.20 mL (2.1 mg/mL in toluene)], KF (23.2 mg, 2.0 equiv), 4-phenyl-1-butene (**1a**) (30.0 μL, 0.20 mmol), DMMS (49.3 μL, 0.40 mmol), anhydrous toluene (0.60 mL) and DMPU (0.20 mL). The reaction mixture was stirred for 24 h at rt. The crude material was purified by flash column chromatography (PE) to provide the title compound as a colorless liquid in 77% yield (54.3 mg) with 98:2 *rr*.

**R<sub>f</sub>** 0.2 (PE), UV;

**<sup>1</sup>H NMR** (500 MHz, CDCl<sub>3</sub>) δ 7.33 – 7.24 (m, 8H), 7.20 (t, *J* = 6.8 Hz, 1H), 4.75 (s, 2H), 3.95 (t, *J* = 7.8 Hz, 1H), 2.07 (q, *J* = 7.8 Hz, 2H), 1.35 – 1.31 (m, 2H), 1.01 – 0.95 (m, 12H), 0.14 (s, 6H);

**<sup>13</sup>C NMR** (126 MHz, CDCl<sub>3</sub>) δ 145.5, 144.0, 139.1, 128.4, 127.9, 127.7, 126.2, 125.9, 64.8, 50.8, 38.0, 29.7, 26.0, 21.2, 18.5, 14.1, -5.2;



**HRMS** (ESI) calcd. for C<sub>23</sub>H<sub>35</sub>OSi [M+H]<sup>+</sup> *m/z* 355.2452, found 355.2453;

**IR** (neat, cm<sup>-1</sup>) 2955, 1252, 1082, 697;

[α]<sub>D</sub><sup>20</sup> = -4.8 (*c* = 1.8, CHCl<sub>3</sub>); 92% *ee*;

**HPLC analysis** CHIRALCEL OD-H column, hexane, 0.8 mL/min, 220 nm UV detector, *t*<sub>R</sub> (minor) = 8.2 min, *t*<sub>R</sub> (major) = 9.2 min.

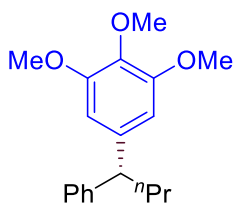

**(R)-1,2,3-Trimethoxy-5-(1-phenylbutyl)benzene** (Figure 3, **3f**). From **5-Iodo-1,2,3-trimethoxybenzene** (117.6 mg, 0.40 mmol, 2.0 equiv), the title compound was prepared following the general procedure **A** using NiCl<sub>2</sub>·glyme (2.2 mg, 5.0 mol%), **L**\* (7.2 mg, 6.0 mol%), **L** [0.17 mg, 0.08 mL (2.1 mg/mL in toluene)], KF (23.2 mg, 2.0 equiv), 4-phenyl-1-butene (**1a**) (30.0 μL, 0.20 mmol), DMMS (49.3 μL, 0.40 mmol), anhydrous toluene (0.72 mL) and DMPU (0.20 mL). The reaction mixture was stirred for 24 h at rt. The crude material was purified by flash column chromatography (0–3% EtOAc in PE) to provide the title compound as a colorless liquid in 71% yield (42.8 mg) with 99:1 rr.

**Rf** 0.3 (5% EtOAc in PE), UV;

**<sup>1</sup>H NMR** (500 MHz, CDCl<sub>3</sub>) δ 7.35 – 7.26 (m, 4H), 7.21 (t, *J* = 7.0 Hz, 1H), 6.49 (s, 2H), 3.90 – 3.83 (m, 10H), 2.07 – 1.98 (m, 2H), 1.36 – 1.30 (m, 2H), 0.97 (t, *J* = 7.4 Hz, 3H);

**<sup>13</sup>C NMR** (126 MHz, CDCl<sub>3</sub>) δ 153.1, 145.1, 141.1, 136.2, 128.4, 127.7, 126.1, 104.8, 60.8, 56.1, 51.4, 38.0, 21.2, 14.1;

**HRMS** (ESI) calcd. for C<sub>19</sub>H<sub>25</sub>O<sub>3</sub> [M+H]<sup>+</sup> *m/z* 301.1798, found 301.1797;

**IR** (neat, cm<sup>-1</sup>) 2930, 1586, 1123, 700;

[α]<sub>D</sub><sup>20</sup> = -4.8 (*c* = 1.5, CHCl<sub>3</sub>); 97% *ee*;

**HPLC analysis** CHIRALCEL IC column, 5% *i*PrOH in hexane, 1.0 mL/min, 220 nm UV detector, *t*<sub>R</sub> (major) = 12.2 min, *t*<sub>R</sub> (minor) = 15.5 min.

**Note:**

From **5-Bromo-1,2,3-trimethoxybenzene** (**2f'**) (98.8 mg, 0.40 mmol), the title compound was prepared following the general procedure **A**, and the crude material was purified by

flash column chromatography (0–3% EtOAc in PE) to provide the title compound as a colorless liquid in 55% yield (32.8 mg) with 96% *ee* and 99:1 rr.

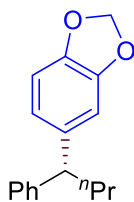

**(R)-5-(1-Phenylbutyl)benzo[*d*][1,3]dioxole** (Figure 3, **3g**). From **5-Iodobenzo[*d*][1,3]dioxole** (99.2 mg, 0.40 mmol, 2.0 equiv), the title compound was prepared following the general procedure **A** using NiCl<sub>2</sub>·glyme (2.2 mg, 5.0 mol%), **L\*** (7.2 mg, 6.0 mol%), **L** [0.17 mg, 0.08 mL (2.1 mg/mL in toluene)], KF (23.2 mg, 2.0 equiv), 4-phenyl-1-butene (**1a**) (30.0 μL, 0.20 mmol), DMMS (49.3 μL, 0.40 mmol), anhydrous toluene (0.72 mL) and DMPU (0.20 mL). The reaction mixture was stirred for 24 h at rt. The crude material was purified by flash column chromatography (0–2% EtOAc in PE) to provide the title compound as a colorless liquid in 70% yield (35.5 mg) with 99:1 rr.

**Rf** 0.2 (2% EtOAc in PE), UV;

**<sup>1</sup>H NMR** (500 MHz, CDCl<sub>3</sub>) δ 7.32 (t, *J* = 7.5 Hz, 2H), 7.27 (d, *J* = 6.7 Hz, 2H), 7.21 (t, *J* = 7.2 Hz, 1H), 6.77 (s, 3H), 5.93 (d, *J* = 1.9 Hz, 2H), 3.88 (t, *J* = 7.8 Hz, 1H), 2.07 – 1.96 (m, 2H), 1.40 – 1.26 (m, 2H), 0.97 (t, *J* = 7.4 Hz, 3H);

**<sup>13</sup>C NMR** (126 MHz, CDCl<sub>3</sub>) δ 147.7, 145.7, 145.4, 139.4, 128.4, 127.7, 126.1, 120.8, 108.3, 108.1, 100.8, 50.7, 38.0, 21.2, 14.1;

**HRMS** (ESI) calcd. for C<sub>17</sub>H<sub>19</sub>O<sub>2</sub> [M+H]<sup>+</sup> *m/z* 277.1199, found 277.1197;

**IR** (neat, cm<sup>-1</sup>) 2955, 1484, 1243, 1037, 697;

[α]<sub>D</sub><sup>20</sup> = –8.9 (*c* = 1.7, CHCl<sub>3</sub>); 95% *ee*;

**HPLC analysis** CHIRALCEL OJ-H column, 5% *i*PrOH in hexane, 0.5 mL/min, 220 nm UV detector, *t*<sub>R</sub> (minor) = 17.2 min, *t*<sub>R</sub> (major) = 18.8 min.

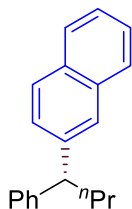

**(R)-2-(1-Phenylbutyl)naphthalene** (Figure 3, **3h**). From **2-Iodonaphthalene** (101.6 mg, 0.40 mmol, 2.0 equiv), the title compound was prepared following the general procedure **A** using NiCl<sub>2</sub>·glyme (2.2 mg, 5.0 mol%), **L\*** (7.2 mg, 6.0 mol%), **L** [0.17 mg, 0.08 mL (2.1 mg/mL in toluene)], KF (23.2 mg, 2.0 equiv), 4-phenyl-1-butene (**1a**) (30.0 μL, 0.20 mmol), DMMS (49.3 μL, 0.40 mmol), anhydrous toluene (0.72 mL) and DMPU (0.20 mL). The reaction mixture was stirred for 24 h at rt. The crude material was purified by flash column chromatography (PE) to provide the title compound as a colorless liquid in 74% yield (38.3 mg) with 99:1 rr.

**Rf** 0.5 (PE), UV;

**<sup>1</sup>H NMR** (500 MHz, CDCl<sub>3</sub>) δ 7.85 (dd, *J* = 11.6, 7.7 Hz, 2H), 7.82 – 7.77 (m, 2H), 7.54 – 7.44 (m, 2H), 7.42 (d, *J* = 8.4 Hz, 1H), 7.39 – 7.31 (m, 4H), 7.27 – 7.21 (m, 1H), 4.15 (t, *J* = 7.8 Hz, 1H), 2.28 – 2.13 (m, 2H), 1.45 – 1.36 (m, 2H), 1.03 (t, *J* = 7.4 Hz, 3H);

**<sup>13</sup>C NMR** (126 MHz, CDCl<sub>3</sub>) δ 145.3, 142.8, 133.6, 132.2, 128.4, 128.0, 128.0, 127.7, 127.6, 126.9, 126.1, 125.9, 125.9, 125.4, 51.1, 37.7, 21.3, 14.2;

**HRMS** (ESI) calcd. for C<sub>20</sub>H<sub>20</sub>Na [M+Na]<sup>+</sup> *m/z* 283.1457, found 283.1459;

**IR** (neat, cm<sup>-1</sup>) 2927, 1598, 742, 697;

**[α]<sub>D</sub><sup>20</sup>** = -15.6 (*c* = 1.4, CHCl<sub>3</sub>); 95% *ee*;

**HPLC analysis** CHIRALCEL OD-H column, hexane, 0.8 mL/min, 220 nm UV detector, *t<sub>R</sub>* (minor) = 25.7 min, *t<sub>R</sub>* (major) = 40.3 min.

**Note:**

From **2-Bromonaphthalene (2h')** (82.8 mg, 0.40 mmol), the title compound was prepared following the general procedure **A**, and the crude material was purified by flash column chromatography (PE) to provide the title compound as a colorless liquid in 55% yield (28.7 mg) with 95% *ee* and 99:1 rr.

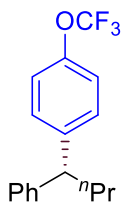

**(R)-1-(1-Phenylbutyl)-4-(trifluoromethoxy)benzene** (Figure 3, **3i**). From **1-Iodo-4-(trifluoromethoxy)benzene** (115.2 mg, 0.40 mmol, 2.0 equiv), the title compound was prepared following the general procedure **A** using  $\text{NiCl}_2 \cdot \text{glyme}$  (2.2 mg, 5.0 mol%), **L\*** (7.2 mg, 6.0 mol%), **L** [0.42 mg, 0.2 mL (2.1 mg/mL in toluene)], KF (23.2 mg, 2.0 equiv), 4-phenyl-1-butene (**1a**) (30.0  $\mu\text{L}$ , 0.20 mmol), DMMS (49.3  $\mu\text{L}$ , 0.40 mmol), anhydrous toluene (0.60 mL) and DMPU (0.20 mL). The reaction mixture was stirred for 24 h at rt. The crude material was purified by flash column chromatography (0–1% EtOAc in PE) to provide the title compound as a colorless liquid in 67% yield (39.4 mg) with 98:2 rr.

**Rf** 0.2 (3% EtOAc in PE), UV;

**$^1\text{H}$  NMR** (500 MHz,  $\text{CDCl}_3$ )  $\delta$  7.33 (t,  $J = 7.6$  Hz, 2H), 7.30 – 7.25 (m, 4H), 7.23 (t,  $J = 7.2$  Hz, 1H), 7.15 (d,  $J = 8.2$  Hz, 2H), 3.96 (t,  $J = 7.8$  Hz, 1H), 2.10 – 1.99 (m, 2H), 1.32 (q,  $J = 7.5$  Hz, 2H), 0.97 (t,  $J = 7.4$  Hz, 3H);

**$^{13}\text{C}$  NMR** (126 MHz,  $\text{CDCl}_3$ )  $\delta$  147.4 (q,  $J = 1.7$  Hz), 144.7, 144.1, 129.1, 128.5, 127.8, 126.3, 120.9, 120.5 (q,  $J = 256.6$  Hz), 50.5, 37.9, 21.1, 14.0;

**$^{19}\text{F}$  NMR** (471 MHz,  $\text{CDCl}_3$ )  $\delta$  –57.9;

**HRMS** (ESI) calcd. for  $\text{C}_{17}\text{H}_{18}\text{F}_3\text{O}$   $[\text{M}+\text{H}]^+$   $m/z$  295.1304, found 295.1306;

**IR** (neat,  $\text{cm}^{-1}$ ) 1507, 1253, 1156, 697;

**$[\alpha]_{\text{D}}^{20}$**  = –2.1 ( $c = 1.2$ ,  $\text{CHCl}_3$ ); 92% *ee*;

**HPLC analysis** CHIRALCEL OJ-H column, hexane, 0.5 mL/min, 220 nm UV detector,  $t_{\text{R}}$  (minor) = 11.9 min,  $t_{\text{R}}$  (major) = 13.1 min.

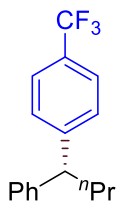

**(R)-1-(1-Phenylbutyl)-4-(trifluoromethyl)benzene** (Figure 3, **3j**). From **1-Iodo-4-(trifluoromethyl)benzene** (108.8 mg, 0.40 mmol, 2.0 equiv), the title compound was prepared following the general procedure **A** using NiCl<sub>2</sub>·glyme (2.2 mg, 5.0 mol%), **L\*** (7.2 mg, 6.0 mol%), **L** [0.17 mg, 0.08 mL (2.1 mg/mL in toluene)], KF (23.2 mg, 2.0 equiv), 4-phenyl-1-butene (**1a**) (30.0 μL, 0.20 mmol), DMMS (49.3 μL, 0.40 mmol), anhydrous toluene (0.72 mL) and DMPU (0.20 mL). The reaction mixture was stirred for 24 h at rt. The crude material was purified by flash column chromatography (0–1% EtOAc in PE) to provide the title compound as a colorless liquid in 67% yield (37.5 mg) with 97:3 rr.

**Rf** 0.5 (1% EtOAc in PE), UV;

<sup>1</sup>H NMR (500 MHz, CDCl<sub>3</sub>) δ 7.57 (d, *J* = 8.2 Hz, 2H), 7.40 (d, *J* = 8.1 Hz, 2H), 7.34 (t, *J* = 7.6 Hz, 2H), 7.27 (d, *J* = 6.7 Hz, 2H), 7.24 (t, *J* = 7.2 Hz, 1H), 4.02 (t, *J* = 7.8 Hz, 1H), 2.16 – 2.01 (m, 2H), 1.38 – 1.28 (m, 2H), 0.98 (t, *J* = 7.3 Hz, 3H);

<sup>13</sup>C NMR (126 MHz, CDCl<sub>3</sub>) δ 149.5, 144.3, 128.6, 128.2, 127.9, 127.8, 126.4, 125.4 (q, *J* = 3.9 Hz), 122.2 (q, *J* = 272.3 Hz), 50.9, 37.7, 21.1, 14.0;

<sup>19</sup>F NMR (471 MHz, CDCl<sub>3</sub>) δ –62.3;

**HRMS** (ESI) calcd. for C<sub>17</sub>H<sub>18</sub>F<sub>3</sub> [M+H]<sup>+</sup> *m/z* 279.1355, found 279.1358;

**IR** (neat, cm<sup>-1</sup>) 2960, 1322, 1116, 1017, 698;

[α]<sub>D</sub><sup>20</sup> = +1.6 (*c* = 1.7, CHCl<sub>3</sub>); 95% *ee*;

**HPLC analysis** CHIRALCEL OJ-H\*2 column, hexane, 0.4 mL/min, 220 nm UV detector, *t*<sub>R</sub> (minor) = 31.5 min, *t*<sub>R</sub> (major) = 34.2 min.

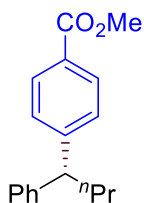

**Methyl (R)-4-(1-phenylbutyl)benzoate** (Figure 3, **3k**). From **Methyl 4-iodobenzoate** (104.8 mg, 0.40 mmol, 2.0 equiv), the title compound was prepared following the general procedure **A** using NiCl<sub>2</sub>·glyme (2.2 mg, 5.0 mol%), **L\*** (7.2 mg, 6.0 mol%), **L** [0.17 mg, 0.08 mL (2.1 mg/mL in toluene)], KF (23.2 mg, 2.0 equiv), 4-phenyl-1-butene (**1a**) (30.0 μL, 0.20 mmol), DMMS (49.3 μL, 0.40 mmol), anhydrous toluene (0.72 mL) and DMPU

(0.20 mL). The reaction mixture was stirred for 24 h at rt. The crude material was purified by flash column chromatography (0–5% EtOAc in PE) to provide the title compound as a colorless liquid in 80% yield (42.9 mg) with 98:2 rr.

**Rf** 0.2 (5% EtOAc in PE), UV;

**<sup>1</sup>H NMR** (500 MHz, CDCl<sub>3</sub>) δ 7.99 (d, *J* = 8.4 Hz, 2H), 7.37 – 7.28 (m, 4H), 7.26 (d, *J* = 8.1 Hz, 2H), 7.22 (t, *J* = 7.2 Hz, 1H), 4.00 (t, *J* = 7.8 Hz, 1H), 3.92 (s, 3H), 2.13 – 2.00 (m, 2H), 1.34 – 1.28 (m, 2H), 0.96 (t, *J* = 7.4 Hz, 3H);

**<sup>13</sup>C NMR** (126 MHz, CDCl<sub>3</sub>) δ 167.1, 150.8, 144.4, 129.8, 128.5, 128.0, 127.9, 127.9, 126.3, 52.0, 51.1, 37.6, 21.1, 14.1;

**HRMS** (ESI) calcd. for C<sub>18</sub>H<sub>21</sub>O<sub>2</sub> [M+H]<sup>+</sup> *m/z* 269.1536, found 269.1534;

**IR** (neat, cm<sup>-1</sup>) 2954, 1718, 1274, 697;

[α]<sub>D</sub><sup>20</sup> = –5.5 (*c* = 1.5, CHCl<sub>3</sub>); 90% *ee*;

**HPLC analysis** CHIRALCEL IC column, 1% *i*PrOH in hexane, 0.8 mL/min, 220 nm UV detector, *t*<sub>R</sub> (minor) = 13.2 min, *t*<sub>R</sub> (major) = 15.1 min.

**Note:**

From **Methyl 4-bromobenzoate (2k')** (86.0 mg, 0.40 mmol), the title compound was prepared following the general procedure **A**, and the crude material was purified by flash column chromatography (0–1% EtOAc in PE) to provide the title compound as a colorless liquid in 50% yield (26.9 mg) with 91% *ee* and 98:2 rr.

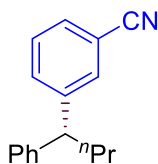

**(R)-3-(1-Phenylbutyl)benzonitrile** (Figure 3, **3l**). From **3-Iodobenzonitrile** (91.6 mg, 0.40 mmol, 2.0 equiv), the title compound was prepared following the general procedure **A** using NiCl<sub>2</sub>·glyme (2.2 mg, 5.0 mol%), **L\*** (7.2 mg, 6.0 mol%), **L** [0.17 mg, 0.08 mL (2.1 mg/mL in toluene)], KF (23.2 mg, 2.0 equiv), 4-phenyl-1-butene (**1a**) (30.0 μL, 0.20 mmol), DMMS (49.3 μL, 0.40 mmol), anhydrous toluene (0.72 mL) and DMPU (0.20 mL). The reaction mixture was stirred for 24 h at rt. The crude material was purified by flash column chromatography (0–1% EtOAc in PE) to provide the title compound as a colorless liquid in 71% yield (33.4 mg) with 96:4 rr.

**Rf** 0.4 (1% EtOAc in PE), UV;

**<sup>1</sup>H NMR** (500 MHz, CDCl<sub>3</sub>) δ 7.56 (s, 1H), 7.52 – 7.47 (m, 2H), 7.39 (t, *J* = 7.8 Hz, 1H), 7.35 – 7.31 (m, 2H), 7.23 (d, *J* = 7.7 Hz, 3H), 3.97 (t, *J* = 7.8 Hz, 1H), 2.12 – 1.98 (m, 2H), 1.33 – 1.27 (m, 2H), 0.96 (t, *J* = 7.3 Hz, 3H);

**<sup>13</sup>C NMR** (126 MHz, CDCl<sub>3</sub>) δ 146.9, 143.7, 132.6, 131.5, 129.8, 129.2, 128.7, 127.8, 126.6, 119.1, 112.4, 50.7, 37.6, 21.0, 14.0;

**HRMS** (ESI) calcd. for C<sub>17</sub>H<sub>18</sub>N [M+H]<sup>+</sup> *m/z* 236.1434, found 236.1435;

**IR** (neat, cm<sup>-1</sup>) 2957, 2228, 1452, 691;

**[α]<sub>D</sub><sup>20</sup>** = -7.5 (*c* = 1.1, CHCl<sub>3</sub>); 94% *ee*;

**HPLC analysis** CHIRALCEL OJ-H column, 5% <sup>i</sup>PrOH in pentane, 0.5 mL/min, 220 nm UV detector, *t<sub>R</sub>* (major) = 25.7 min, *t<sub>R</sub>* (minor) = 28.0 min.

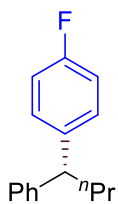

**(*R*)-1-Fluoro-4-(1-phenylbutyl)benzene** (Figure 3, **3m**). From **1-Fluoro-4-iodobenzene** (88.8 mg, 0.40 mmol, 2.0 equiv), the title compound was prepared following the general procedure **A** using NiCl<sub>2</sub>·glyme (2.2 mg, 5.0 mol%), **L\*** (7.2 mg, 6.0 mol%), **L** [0.17 mg, 0.08 mL (2.1 mg/mL in toluene)], KF (23.2 mg, 2.0 equiv), 4-phenyl-1-butene (**1a**) (30.0 μL, 0.20 mmol), DMMS (49.3 μL, 0.40 mmol), anhydrous toluene (0.72 mL) and DMPU (0.20 mL). The reaction mixture was stirred for 24 h at rt. The crude material was purified by flash column chromatography (0–1% EtOAc in PE) to provide the title compound as a colorless liquid in 74% yield (34.0 mg) with 97:3 rr.

**Rf** 0.5 (1% EtOAc in PE), UV;

**<sup>1</sup>H NMR** (500 MHz, CDCl<sub>3</sub>) δ 7.32 (t, *J* = 7.6 Hz, 2H), 7.27 – 7.20 (m, 5H), 7.00 (t, *J* = 8.7 Hz, 2H), 3.94 (t, *J* = 7.8 Hz, 1H), 2.11 – 1.97 (m, 2H), 1.37 – 1.26 (m, 2H), 0.97 (t, *J* = 7.3 Hz, 3H);

**<sup>13</sup>C NMR** (126 MHz, CDCl<sub>3</sub>) δ 161.3 (d, *J* = 243.8 Hz), 145.2, 141.1 (d, *J* = 3.0 Hz), 129.2 (d, *J* = 7.6 Hz), 128.5, 127.8, 126.2, 115.1 (d, *J* = 21.3 Hz), 50.3, 38.1, 21.13, 14.1;

**<sup>19</sup>F NMR** (471 MHz, CDCl<sub>3</sub>) δ -117.5;

**HRMS** (ESI) calcd. for C<sub>17</sub>H<sub>18</sub>F [M+H]<sup>+</sup> *m/z* 229.1387, found 229.1390;

**IR** (neat, cm<sup>-1</sup>) 2957, 1507, 1222, 697;

[α]<sub>D</sub><sup>20</sup> = -2.7 (*c* = 1.1, CHCl<sub>3</sub>); 94% *ee*;

**HPLC analysis** CHIRALCEL OJ-H column, 20% <sup>i</sup>PrOH in hexane, 0.8 mL/min, 220 nm UV detector, *t*<sub>R</sub> (minor) = 5.5 min, *t*<sub>R</sub> (major) = 6.3 min.

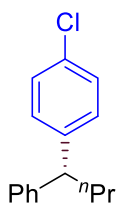

**(R)-1-Chloro-4-(1-phenylbutyl)benzene** (Figure 3, **3n**). From **1-Chloro-4-iodobenzene** (95.4 mg, 0.40 mmol, 2.0 equiv), the title compound was prepared following the general procedure **A** using NiCl<sub>2</sub>·glyme (2.2 mg, 5.0 mol%), **L\*** (7.2 mg, 6.0 mol%), **L** [0.17 mg, 0.08 mL (2.1 mg/mL in toluene)], KF (23.2 mg, 2.0 equiv), 4-phenyl-1-butene (**1a**) (30.0 μL, 0.20 mmol), DMMS (49.3 μL, 0.40 mmol), anhydrous toluene (0.72 mL) and DMPU (0.20 mL). The reaction mixture was stirred for 24 h at rt. The crude material was purified by flash column chromatography (0–1% EtOAc in PE) to provide the title compound as a colorless liquid in 74% yield (36.3 mg) with 98:2 *rr*.

**Rf** 0.4 (1% EtOAc in PE), UV;

**<sup>1</sup>H NMR** (500 MHz, CDCl<sub>3</sub>) δ 7.32 (t, *J* = 7.6 Hz, 2H), 7.28 (d, *J* = 8.5 Hz, 2H), 7.26 – 7.18 (m, 5H), 3.93 (t, *J* = 7.8 Hz, 1H), 2.11 – 1.97 (m, 2H), 1.36 – 1.27 (m, 2H), 0.97 (t, *J* = 7.4 Hz, 3H);

**<sup>13</sup>C NMR** (126 MHz, CDCl<sub>3</sub>) δ 144.8, 143.8, 131.7, 129.2, 128.5, 127.8, 126.2, 50.5, 37.8, 21.1, 14.0;

**HRMS** (ESI) calcd. for C<sub>16</sub>H<sub>17</sub>ClNa [M+Na]<sup>+</sup> *m/z* 267.0911, found 267.0909;

**IR** (neat, cm<sup>-1</sup>) 2956, 1488, 1091, 1013, 697;

[α]<sub>D</sub><sup>20</sup> = -6.0 (*c* = 1.4, CHCl<sub>3</sub>); 91% *ee*;

**HPLC analysis** CHIRALCEL OJ-H column, 5% <sup>i</sup>PrOH in hexane, 1.0 mL/min, 220 nm UV detector, *t*<sub>R</sub> (minor) = 4.5 min, *t*<sub>R</sub> (major) = 4.9 min.



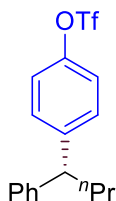

**(R)-4-(1-Phenylbutyl)phenyl trifluoromethanesulfonate** (Figure 3, **3o**). From **4-Iodophenyl trifluoromethanesulfonate** (140.8 mg, 0.40 mmol, 2.0 equiv), the title compound was prepared following the general procedure **A** using NiCl<sub>2</sub>·glyme (2.2 mg, 5.0 mol%), **L**\* (7.2 mg, 6.0 mol%), **L** [0.17 mg, 0.08 mL (2.1 mg/mL in toluene)], KF (23.2 mg, 2.0 equiv), 4-phenyl-1-butene (**1a**) (30.0 μL, 0.20 mmol), DMMS (49.3 μL, 0.40 mmol), anhydrous toluene (0.72 mL) and DMPU (0.20 mL). The reaction mixture was stirred for 24 h at rt. The crude material was purified by flash column chromatography (0–1% EtOAc in PE) to provide the title compound as a colorless liquid in 68% yield (48.8 mg) with 97:3 rr.

**Rf** 0.4 (1% EtOAc in PE), UV;

**<sup>1</sup>H NMR** (500 MHz, CDCl<sub>3</sub>) δ 7.46 – 7.28 (m, 5H), 7.28 – 7.15 (m, 4H), 3.97 (t, *J* = 7.3 Hz, 1H), 2.25 – 1.98 (m, 2H), 1.39 – 1.26 (m, 2H), 0.96 (t, *J* = 6.9 Hz, 3H);

**<sup>13</sup>C NMR** (126 MHz, CDCl<sub>3</sub>) δ 147.8, 146.0, 144.6, 129.6, 127.9, 126.5, 123.4, 121.2, 116.2 (d, *J* = 322.3 Hz), 50.5, 37.9, 21.1, 14.0;

**<sup>19</sup>F NMR** (471 MHz, CDCl<sub>3</sub>) δ –72.9;

**HRMS** (ESI) calcd. for C<sub>17</sub>H<sub>17</sub>F<sub>3</sub>NaO<sub>3</sub>S[M+Na]<sup>+</sup> *m/z* 381.0743, found 381.0740;

**IR** (neat, cm<sup>-1</sup>) 2960, 1421, 1207, 1137, 885;

**[α]<sub>D</sub><sup>20</sup>** = –1.6 (*c* = 2.3, CHCl<sub>3</sub>); 94% *ee*;

**HPLC analysis** CHIRALCEL OJ-H column, 1% <sup>i</sup>PrOH in hexane, 0.8 mL/min, 220 nm UV detector, *t<sub>R</sub>* (minor) = 8.3 min, *t<sub>R</sub>* (major) = 9.8 min.

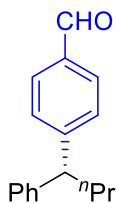

**(R)-4-(1-Phenylbutyl)benzaldehyde** (Figure 3, **3p**). From **4-Iodobenzaldehyde** (93.0 mg, 0.40 mmol, 2.0 equiv), the title compound was prepared following the general

procedure **A** using NiCl<sub>2</sub>·glyme (2.2 mg, 5.0 mol%), **L**\* (7.2 mg, 6.0 mol%), **L** [0.17 mg, 0.08 mL (2.1 mg/mL in toluene)], KF (23.2 mg, 2.0 equiv), 4-phenyl-1-butene (**1a**) (30.0 μL, 0.20 mmol), DMMS (49.3 μL, 0.40 mmol), anhydrous toluene (0.72 mL) and DMPU (0.20 mL). The reaction mixture was stirred for 24 h at rt. The crude material was purified by flash column chromatography (0–3% EtOAc in PE) to provide the title compound as a colorless liquid in 71% yield (34.2 mg) with 97:3 rr.

**Rf** 0.2 (4% EtOAc in PE), UV;

**<sup>1</sup>H NMR** (500 MHz, CDCl<sub>3</sub>) δ 9.98 (s, 1H), 7.82 (d, *J* = 8.2 Hz, 2H), 7.44 (d, *J* = 8.1 Hz, 2H), 7.32 (t, *J* = 7.6 Hz, 2H), 7.26 (d, *J* = 6.9 Hz, 2H), 7.22 (t, *J* = 7.2 Hz, 1H), 4.02 (t, *J* = 7.8 Hz, 1H), 2.12 – 2.03 (m, 2H), 1.34 – 1.29 (m, 2H), 0.96 (t, *J* = 7.3 Hz, 3H);

**<sup>13</sup>C NMR** (126 MHz, CDCl<sub>3</sub>) δ 192.0, 152.7, 144.0, 134.6, 130.0, 128.6, 128.6, 127.9, 126.5, 51.3, 37.6, 21.1, 14.0;

**HRMS** (ESI) calcd. for C<sub>17</sub>H<sub>19</sub>O [M+H]<sup>+</sup> *m/z* 239.1430, found 239.1431;

**IR** (neat, cm<sup>-1</sup>) 2956, 1698, 1603, 698;

[α]<sub>D</sub><sup>20</sup> = -1.9 (*c* = 1.5, CHCl<sub>3</sub>); 90% *ee*;

**HPLC analysis** CHIRALCEL OJ-H column, 10% *i*PrOH in hexane, 0.8 mL/min, 220 nm UV detector, *t*<sub>R</sub> (minor) = 10.4 min, *t*<sub>R</sub> (major) = 11.5 min.

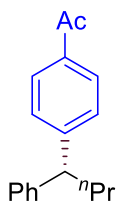

**(R)-1-(4-(1-Phenylbutyl)phenyl)ethan-1-one** (Figure 3, **3q**). From **1-(4-Iodophenyl)ethan-1-one** (98.4 mg, 0.40 mmol, 2.0 equiv), the title compound was prepared following the general procedure **A** using NiCl<sub>2</sub>·glyme (2.2 mg, 5.0 mol%), **L**\* (7.2 mg, 6.0 mol%), **L** [0.17 mg, 0.08 mL (2.1 mg/mL in toluene)], KF (23.2 mg, 2.0 equiv), 4-phenyl-1-butene (**1a**) (30.0 μL, 0.20 mmol), DMMS (49.3 μL, 0.40 mmol), anhydrous toluene (0.72 mL) and DMPU (0.20 mL). The reaction mixture was stirred for 24 h at rt. The crude material was purified by flash column chromatography (0–3% EtOAc in PE) to provide the title compound as a colorless liquid in 71% yield (35.8 mg) with 97:3 rr.

**Rf** 0.2 (3% EtOAc in PE), UV;

**<sup>1</sup>H NMR** (500 MHz, CDCl<sub>3</sub>) δ 7.91 (d, *J* = 8.4 Hz, 2H), 7.37 (d, *J* = 8.4 Hz, 2H), 7.34 – 7.30 (m, 2H), 7.26 (d, *J* = 8.5 Hz, 2H), 7.22 (t, *J* = 7.2 Hz, 1H), 4.01 (t, *J* = 7.8 Hz, 1H), 2.59 (s, 3H), 2.12 – 2.04 (m, 2H), 1.35 – 1.29 (m, 2H), 0.97 (t, *J* = 7.4 Hz, 3H);

**<sup>13</sup>C NMR** (126 MHz, CDCl<sub>3</sub>) δ 197.8, 151.1, 144.3, 135.2, 128.6, 128.6, 128.1, 127.9, 126.4, 51.1, 37.6, 26.6, 21.1, 14.0;

**HRMS** (ESI) calcd. for C<sub>18</sub>H<sub>21</sub>O [M+H]<sup>+</sup> *m/z* 253.1587, found 253.1586;

**IR** (neat, cm<sup>-1</sup>) 2957, 1679, 1604, 1266, 699;

**[α]<sub>D</sub><sup>20</sup>** = -1.9 (*c* = 1.5, CHCl<sub>3</sub>); 90% *ee*;

**HPLC analysis** CHIRALCEL OJ-H column, 10% EtOH in hexane, 0.5 mL/min, 220 nm UV detector, *t<sub>R</sub>* (minor) = 9.0 min, *t<sub>R</sub>* (major) = 9.6 min.

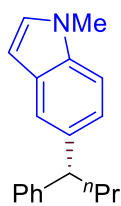

**(R)-1-Methyl-5-(1-phenylbutyl)-1H-indole** (Figure 3, **3r**). From **5-Iodo-1-methyl-1H-indole** (102.8 mg, 0.40 mmol, 2.0 equiv), the title compound was prepared following the general procedure **A** using NiCl<sub>2</sub>·glyme (2.2 mg, 5.0 mol%), **L\*** (7.2 mg, 6.0 mol%), **L** [0.17 mg, 0.08 mL (2.1 mg/mL in toluene)], KF (23.2 mg, 2.0 equiv), 4-phenyl-1-butene (**1a**) (30.0 μL, 0.20 mmol), DMMS (49.3 μL, 0.40 mmol), anhydrous toluene (0.72 mL) and DMPU (0.20 mL). The reaction mixture was stirred for 24 h at rt. The crude material was purified by flash column chromatography (0–1% EtOAc in PE) to provide the title compound as a colorless liquid in 60% yield (31.5 mg) with 98:2 rr.

**Rf** 0.2 (5% EtOAc in PE), UV;

**<sup>1</sup>H NMR** (500 MHz, CDCl<sub>3</sub>) δ 7.59 (s, 1H), 7.38 – 7.31 (m, 4H), 7.29 (d, *J* = 8.4 Hz, 1H), 7.21 (t, *J* = 7.1 Hz, 1H), 7.18 (d, *J* = 8.5 Hz, 1H), 7.06 (d, *J* = 3.1 Hz, 1H), 6.50 (d, *J* = 3.1 Hz, 1H), 4.10 (t, *J* = 7.8 Hz, 1H), 3.79 (s, 3H), 2.21 – 2.12 (m, 2H), 1.43 – 1.36 (m, 2H), 1.02 (t, *J* = 7.3 Hz, 3H);

**<sup>13</sup>C NMR** (126 MHz, CDCl<sub>3</sub>) δ 146.6, 136.4, 135.5, 128.9, 128.6, 128.3, 127.9, 125.7, 122.2, 119.6, 109.1, 100.8, 51.1, 38.4, 32.9, 21.4, 14.2;

**HRMS** (ESI) calcd. for C<sub>19</sub>H<sub>21</sub>NNa [M+Na]<sup>+</sup> *m/z* 286.1566, found 286.1565;

**IR** (neat, cm<sup>-1</sup>) 2926, 1512, 1245, 698;

[α]<sub>D</sub><sup>20</sup> = -15.7 (*c* = 1.4, CHCl<sub>3</sub>); 95% *ee*;

**HPLC analysis** CHIRALCEL IC column, 1% EtOH in hexane, 0.5 mL/min, 220 nm UV detector, *t*<sub>R</sub> (major) = 10.0 min, *t*<sub>R</sub> (minor) = 10.7 min.

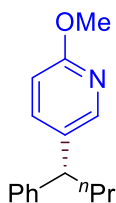

**(R)-2-Methoxy-5-(1-phenylbutyl)pyridine** (Figure 3, **3s**). From **5-Iodo-2-methoxypyridine** (94.0 mg, 0.40 mmol, 2.0 equiv), the title compound was prepared following the general procedure **A** using NiCl<sub>2</sub>·glyme (2.2 mg, 5.0 mol%), **L**\* (7.2 mg, 6.0 mol%), **L** [0.42 mg, 0.2 mL (2.1 mg/mL in toluene)], KF (23.2 mg, 2.0 equiv), 4-phenyl-1-butene (**1a**) (30.0 μL, 0.20 mmol), DMMS (49.3 μL, 0.40 mmol), anhydrous toluene (0.60 mL) and DMPU (0.20 mL). The reaction mixture was stirred for 24 h at rt. The crude material was purified by flash column chromatography (0–4% EtOAc in PE) to provide the title compound as a colorless liquid in 76% yield (36.4 mg) with 97:3 rr.

**Rf** 0.2 (5% EtOAc in PE), UV;

**<sup>1</sup>H NMR** (500 MHz, CDCl<sub>3</sub>) δ 8.09 (s, 1H), 7.44 (dd, *J* = 8.6, 2.5 Hz, 1H), 7.31 (t, *J* = 7.6 Hz, 2H), 7.24 (d, *J* = 6.9 Hz, 2H), 7.20 (t, *J* = 7.2 Hz, 1H), 6.69 (d, *J* = 8.5 Hz, 1H), 3.94 (s, 3H), 3.89 (t, *J* = 7.8 Hz, 1H), 2.07 – 1.96 (m, 2H), 1.34 – 1.29 (m, 2H), 0.95 (t, *J* = 7.4 Hz, 3H);

**<sup>13</sup>C NMR** (126 MHz, CDCl<sub>3</sub>) δ 162.7, 145.6, 144.7, 138.3, 133.3, 128.5, 127.7, 126.3, 110.7, 53.4, 47.7, 37.7, 21.0, 14.0;

**HRMS** (ESI) calcd. for C<sub>16</sub>H<sub>20</sub>NO [M+H]<sup>+</sup> *m/z* 242.1539, found 242.1540;

**IR** (neat, cm<sup>-1</sup>) 2955, 1603, 1489, 1026, 697;

[α]<sub>D</sub><sup>20</sup> = +8.9 (*c* = 1.5, CHCl<sub>3</sub>); 90% *ee*;

**HPLC analysis** CHIRALCEL AD-H column, 5% *i*PrOH in hexane, 0.8 mL/min, 220 nm UV detector, *t*<sub>R</sub> (major) = 5.2 min, *t*<sub>R</sub> (minor) = 5.9 min.

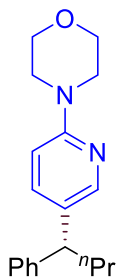

**(R)-4-(5-(1-Phenylbutyl)pyridin-2-yl)morpholine** (Figure 3, **3t**). From **4-(5-Iodopyridin-2-yl)morpholine** (116.0 mg, 0.40 mmol, 2.0 equiv), the title compound was prepared following the general procedure **A** using NiCl<sub>2</sub>·glyme (2.2 mg, 5.0 mol%), **L\*** (7.2 mg, 6.0 mol%), **L** [0.42 mg, 0.2 mL (2.1 mg/mL in toluene)], KF (23.2 mg, 2.0 equiv), 4-phenyl-1-butene (**1a**) (30.0 μL, 0.20 mmol), DMMS (49.3 μL, 0.40 mmol), anhydrous toluene (0.60 mL) and DMPU (0.20 mL). The reaction mixture was stirred for 24 h at rt. The crude material was purified by flash column chromatography (0–1% EtOAc in PE) to provide the title compound as a colorless liquid in 61% yield (36.2 mg) with 97:3 rr.

**Rf** 0.4 (15% EtOAc in PE), UV;

**<sup>1</sup>H NMR** (500 MHz, CDCl<sub>3</sub>) δ 8.15 (s, 1H), 7.38 (dd, *J* = 2.5, 2.5 Hz, 1H), 7.33 – 7.22 (m, 4H), 7.19 (t, *J* = 7.2 Hz, 1H), 6.60 (d, *J* = 8.7 Hz, 1H), 3.86 – 3.81 (m, 5H), 3.52 – 3.45 (m, 4H), 2.07 – 1.96 (m, 2H), 1.37 – 1.27 (m, 2H), 0.95 (t, *J* = 7.4 Hz, 3H);

**<sup>13</sup>C NMR** (126 MHz, CDCl<sub>3</sub>) δ 158.2, 145.1, 137.3, 130.5, 128.5, 127.7, 126.1, 107.0, 66.8, 47.7, 45.8, 37.6, 21.0, 14.0;

**HRMS** (ESI) calcd. for C<sub>19</sub>H<sub>25</sub>N<sub>2</sub>O [M+H]<sup>+</sup> *m/z* 297.1961, found 297.1962;

**IR** (neat, cm<sup>-1</sup>) 2956, 1602, 1488, 1243, 943, 698;

[α]<sub>D</sub><sup>20</sup> = –0.5 (*c* = 1.6, CHCl<sub>3</sub>); 95% *ee*;

**HPLC analysis** CHIRALCEL AD-H column, 2% *i*PrOH in hexane, 1.0 mL/min, 220 nm UV detector, *t*<sub>R</sub> (major) = 8.1 min, *t*<sub>R</sub> (minor) = 10.4 min.

**Note:**

From **4-(5-Bromopyridin-2-yl)morpholine** (**2t'**) (97.2 mg, 0.40 mmol), the title compound was prepared following the general procedure **A**, and the crude material was purified by flash column chromatography (0–1% EtOAc in PE) to provide the title compound as a colorless liquid in 47% yield (38.9 mg) with 95% *ee* and 97:3 rr.

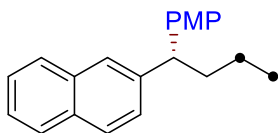

**(S)-2-(1-(4-Methoxyphenyl)butyl)naphthalene** (Figure 4, **4b**). From **2-(But-3-en-1-yl)naphthalene** (36.4 mg, 0.20 mmol), the title compound was prepared following the general procedure **A** using  $\text{NiCl}_2 \cdot \text{glyme}$  (2.2 mg, 5.0 mol%), **L\*** (7.2 mg, 6.0 mol%), **L** [0.42 mg, 0.2 mL (2.1 mg/mL in toluene)], KF (23.2 mg, 2.0 equiv), 4-iodoanisole (94.0 mg, 0.40 mmol, 2.0 equiv), DMMS (49.3  $\mu\text{L}$ , 0.40 mmol), anhydrous toluene (0.60 mL) and DMPU (0.20 mL). The reaction mixture was stirred for 24 h at rt. The crude material was purified by flash column chromatography (0–2% EtOAc in PE) to provide the title compound as a colorless liquid in 78% yield (45.2 mg) with 97:3 rr.

**Rf** 0.2 (2% EtOAc in PE), UV;

**$^1\text{H}$  NMR** (500 MHz,  $\text{CDCl}_3$ )  $\delta$  7.86 (dd,  $J = 11.8, 8.1$  Hz, 2H), 7.80 (d,  $J = 8.5$  Hz, 1H), 7.77 (s, 1H), 7.54 – 7.46 (m, 2H), 7.40 (d,  $J = 8.5$  Hz, 1H), 7.27 (d,  $J = 8.8$  Hz, 2H), 6.90 (d,  $J = 8.7$  Hz, 2H), 4.11 (t,  $J = 7.8$  Hz, 1H), 3.83 (s, 3H), 2.22 – 2.10 (m, 2H), 1.43 – 1.36 (m, 2H), 1.03 (t,  $J = 7.3$  Hz, 3H);

**$^{13}\text{C}$  NMR** (126 MHz,  $\text{CDCl}_3$ )  $\delta$  157.9, 143.2, 137.4, 133.6, 132.2, 128.9, 128.1, 127.7, 127.6, 126.9, 125.9, 125.7, 125.3, 113.8, 55.3, 50.3, 37.9, 21.3, 14.2;

**HRMS** (ESI) calcd. for  $\text{C}_{21}\text{H}_{23}\text{O}$   $[\text{M}+\text{H}]^+$   $m/z$  291.1743, found 291.1745;

**IR** (neat,  $\text{cm}^{-1}$ ) 2955, 1508, 1245, 1035, 813;

$[\alpha]_{\text{D}}^{20} = +7.8$  ( $c = 2.1$ ,  $\text{CHCl}_3$ ); 90% *ee*;

**HPLC analysis** CHIRALCEL AD-H column, 5% *i*PrOH in hexane, 0.8 mL/min, 220 nm UV detector,  $t_{\text{R}}$  (minor) = 6.5 min,  $t_{\text{R}}$  (major) = 7.3 min.

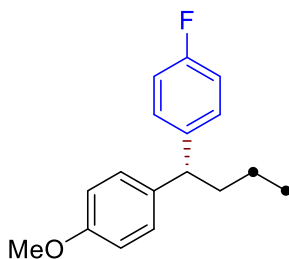

**(R)-1-Fluoro-4-(1-(4-methoxyphenyl)butyl)benzene** (Figure 4, **4c**). From **1-(But-3-en-1-yl)-4-methoxybenzene** (32.4 mg, 0.20 mmol), the title compound was prepared

following the general procedure **A** using NiCl<sub>2</sub>·glyme (2.2 mg, 5.0 mol%), **L**\* (7.2 mg, 6.0 mol%), **L** [0.84 mg, 0.4 mL (2.1 mg/mL in toluene)], KF (23.2 mg, 2.0 equiv), 1-fluoro-4-iodobenzene (88.8 mg, 0.40 mmol, 2.0 equiv), DMMS (49.3 μL, 0.40 mmol), anhydrous toluene (0.40 mL) and DMPU (0.20 mL). The reaction mixture was stirred for 24 h at rt. The crude material was purified by flash column chromatography (0–2% EtOAc in PE) to provide the title compound as a colorless liquid in 74% yield (38.2 mg) with 98:2 rr.

**Rf** 0.3 (3% EtOAc in PE), UV;

**<sup>1</sup>H NMR** (500 MHz, CDCl<sub>3</sub>) δ 7.20 (dd, *J* = 8.6, 5.5 Hz, 2H), 7.16 (d, *J* = 8.6 Hz, 2H), 6.98 (t, *J* = 8.7 Hz, 2H), 6.86 (d, *J* = 8.7 Hz, 2H), 3.88 (t, *J* = 7.8 Hz, 1H), 3.81 (s, 3H), 2.03 – 1.95 (m, 2H), 1.32 – 1.27 (m, 2H), 0.95 (t, *J* = 7.3 Hz, 3H);

**<sup>13</sup>C NMR** (126 MHz, CDCl<sub>3</sub>) δ 161.2 (d, *J* = 243.8 Hz), 157.9, 137.3, 141.5 (d, *J* = 3.0 Hz), 129.1 (d, *J* = 7.9 Hz), 128.6, 115.1 (d, *J* = 20.9 Hz), 113.8, 55.2, 49.4, 38.2, 21.1, 14.1;

**<sup>19</sup>F NMR** (471 MHz, CDCl<sub>3</sub>) δ –117.7;

**HRMS** (ESI) calcd. for C<sub>17</sub>H<sub>19</sub>FN<sub>2</sub>O [M+Na]<sup>+</sup> *m/z* 281.1312, found 281.1313;

**IR** (neat, cm<sup>-1</sup>) 2957, 1505, 1247, 1036, 824;

**[α]<sub>D</sub><sup>20</sup>** = +5.3 (*c* = 1.5, CHCl<sub>3</sub>); 90% *ee*;

**HPLC analysis** CHIRALCEL OJ-H\*2 column, 1% EtOH in hexane, 0.5 mL/min, 220 nm UV detector, *t<sub>R</sub>* (minor) = 37.6 min, *t<sub>R</sub>* (major) = 41.6 min.

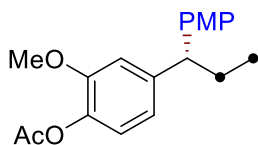

**(S)-2-Methoxy-4-(1-(4-methoxyphenyl)propyl)phenyl acetate** (Figure 4, **4d**). From **4-Allyl-2-methoxyphenyl acetate** (41.2 mg, 0.20 mmol), the title compound was prepared following the general procedure **A** using NiCl<sub>2</sub>·glyme (2.2 mg, 5.0 mol%), **L**\* (7.2 mg, 6.0 mol%), **L** [0.17 mg, 0.08 mL (2.1 mg/mL in toluene)], KF (23.2 mg, 2.0 equiv), 4-phenyl-1-butene (**1a**) (30.0 μL, 0.20 mmol), DMMS (49.3 μL, 0.40 mmol), anhydrous toluene (0.72 mL) and DMPU (0.20 mL). The reaction mixture was stirred for 24 h at rt.

The crude material was purified by flash column chromatography (0–8% EtOAc in PE) to provide the title compound as a colorless liquid in 72% yield (45.0 mg) with 99:1 rr.

**Rf** 0.3 (10% EtOAc in PE), UV;

**<sup>1</sup>H NMR** (500 MHz, CDCl<sub>3</sub>) δ 7.18 (d, *J* = 8.7 Hz, 2H), 6.96 (d, *J* = 7.9 Hz, 1H), 6.90 – 6.80 (m, 4H), 3.81 (s, 6H), 3.76 (t, *J* = 7.8 Hz, 1H), 2.32 (s, 3H), 2.05 (p, *J* = 7.4 Hz, 2H), 0.93 (t, *J* = 7.3 Hz, 3H);

**<sup>13</sup>C NMR** (126 MHz, CDCl<sub>3</sub>) δ 169.2, 157.9, 150.8, 144.6, 137.8, 136.8, 128.8, 122.4, 119.8, 113.8, 112.2, 55.8, 55.2, 52.3, 28.9, 20.7, 12.8;

**HRMS** (ESI) calcd. for C<sub>19</sub>H<sub>22</sub>NaO<sub>4</sub> [M+Na]<sup>+</sup> *m/z* 337.1410, found 337.1412;

**IR** (neat, cm<sup>-1</sup>) 2967, 1762, 1508, 1195, 1033;

[α]<sub>D</sub><sup>20</sup> = –7.2 (*c* = 1.6, CHCl<sub>3</sub>); 90% *ee*;

**HPLC analysis** CHIRALCEL OJ-H column, 5% EtOH in hexane, 0.5 mL/min, 220 nm UV detector, *t*<sub>R</sub> (minor) = 45.3 min, *t*<sub>R</sub> (major) = 49.2 min.

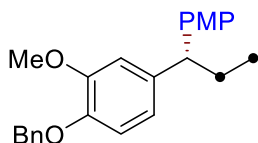

**(S)-1-(Benzyloxy)-2-methoxy-4-(1-(4-methoxyphenyl)propyl)benzene** (Figure 4, **4e**).

From **4-Allyl-1-(benzyloxy)-2-methoxybenzene** (50.9 mg, 0.20 mmol), the title compound was prepared following the general procedure **A** using NiCl<sub>2</sub>·glyme (2.2 mg, 5.0 mol%), **L\*** (7.2 mg, 6.0 mol%), **L** [0.17 mg, 0.08 mL (2.1 mg/mL in toluene)], KF (23.2 mg, 2.0 equiv), 4-phenyl-1-butene (**1a**) (30.0 μL, 0.20 mmol), DMMS (49.3 μL, 0.40 mmol), anhydrous toluene (0.72 mL) and DMPU (0.20 mL). The reaction mixture was stirred for 24 h at rt. The crude material was purified by flash column chromatography (0–5% EtOAc in PE) to provide the title compound as a colorless liquid in 72% yield (52.0 mg) with 99:1 rr.

**Rf** 0.2 (5% EtOAc in PE), UV;

**<sup>1</sup>H NMR** (500 MHz, CDCl<sub>3</sub>) δ 7.47 (d, *J* = 7.5 Hz, 2H), 7.39 (t, *J* = 7.5 Hz, 2H), 7.33 (t, *J* = 7.3 Hz, 1H), 7.18 (d, *J* = 8.6 Hz, 2H), 6.89 – 6.83 (m, 3H), 6.79 (s, 1H), 6.75 (d, *J* = 8.2 Hz, 1H), 5.15 (s, 2H), 3.88 (s, 3H), 3.81 (s, 3H), 3.72 (t, *J* = 7.8 Hz, 1H), 2.04 (p, *J* = 7.4 Hz, 2H), 0.93 (t, *J* = 7.3 Hz, 3H);



$^{13}\text{C}$  NMR (126 MHz,  $\text{CDCl}_3$ )  $\delta$  157.8, 149.5, 146.5, 138.9, 137.5, 137.5, 128.7, 128.5, 127.7, 127.3, 119.6, 113.9, 113.7, 111.9, 71.1, 56.0, 55.2, 52.0, 28.9, 12.9;

HRMS (ESI) calcd. for  $\text{C}_{24}\text{H}_{26}\text{NaO}_3$   $[\text{M}+\text{Na}]^+$   $m/z$  385.1774, found 385.1777;

IR (neat,  $\text{cm}^{-1}$ ) 2966, 1508, 1245, 1034, 695;

$[\alpha]_{\text{D}}^{20} = +0.9$  ( $c = 2.4$ ,  $\text{CHCl}_3$ ); 95% *ee*;

HPLC analysis CHIRALCEL AD-H column, 10% EtOH in hexane, 1.0 mL/min, 220 nm UV detector,  $t_{\text{R}}$  (minor) = 8.5 min,  $t_{\text{R}}$  (major) = 9.7 min.

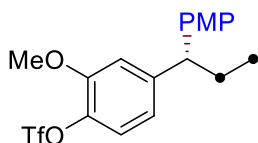

**(S)-2-Methoxy-4-(1-(4-methoxyphenyl)propyl)phenyl trifluoromethanesulfonate**

(Figure 4, **4f**). From **4-Allyl-2-methoxyphenyl trifluoromethanesulfonate** (59.3 mg, 0.20 mmol), the title compound was prepared following the general procedure **A** using  $\text{NiCl}_2 \cdot \text{glyme}$  (2.2 mg, 5.0 mol%), **L\*** (7.2 mg, 6.0 mol%), **L** [0.17 mg, 0.08 mL (2.1 mg/mL in toluene)], KF (23.2 mg, 2.0 equiv), 4-phenyl-1-butene (**1a**) (30.0  $\mu\text{L}$ , 0.20 mmol), DMMS (49.3  $\mu\text{L}$ , 0.40 mmol), anhydrous toluene (0.72 mL) and DMPU (0.20 mL). The reaction mixture was stirred for 24 h at rt. The crude material was purified by flash column chromatography (0–2% EtOAc in PE) to provide the title compound as a colorless liquid in 58% yield (47.1 mg) with 96:4 rr.

*Rf* 0.2 (3% EtOAc in PE), UV;

$^1\text{H}$  NMR (500 MHz,  $\text{CDCl}_3$ )  $\delta$  7.15 (dd,  $J = 13.9, 8.4$  Hz, 3H), 6.92 – 6.83 (m, 4H), 3.88 (s, 3H), 3.81 (s, 3H), 3.77 (t,  $J = 7.8$  Hz, 1H), 2.10 – 2.00 (m, 2H), 0.92 (t,  $J = 7.3$  Hz, 3H);

$^{13}\text{C}$  NMR (126 MHz,  $\text{CDCl}_3$ )  $\delta$  158.2, 151.1, 147.4, 136.9, 136.0, 128.8, 122.1, 119.9, 116.2 (q,  $J = 320.4$  Hz), 113.9, 112.7, 56.1, 55.2, 52.3, 28.8, 12.7;

$^{19}\text{F}$  NMR (471 MHz,  $\text{CDCl}_3$ )  $\delta$  –73.9;

HRMS (ESI) calcd. for  $\text{C}_{18}\text{H}_{20}\text{F}_3\text{O}_5\text{S}$   $[\text{M}+\text{H}]^+$   $m/z$  405.0978, found 405.0978;

IR (neat,  $\text{cm}^{-1}$ ) 2969, 1416, 1202, 878, 612;

$[\alpha]_{\text{D}}^{20} = -7.2$  ( $c = 2.3$ ,  $\text{CHCl}_3$ ); 80% *ee*;

**HPLC analysis** CHIRALCEL OJ-H column, 10% EtOH in hexane, 0.8 mL/min, 220 nm UV detector,  $t_R$  (minor) = 12.4 min,  $t_R$  (major) = 14.1 min.

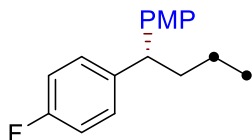

**(S)-1-Fluoro-4-(1-(4-methoxyphenyl)butyl)benzene** (Figure 4, **4g**). From **1-(But-3-en-1-yl)-4-fluorobenzene** (30.1 mg, 0.20 mmol), the title compound was prepared following the general procedure **A** using  $\text{NiCl}_2 \cdot \text{glyme}$  (2.2 mg, 5.0 mol%), **L\*** (7.2 mg, 6.0 mol%), **L** [0.17 mg, 0.08 mL (2.1 mg/mL in toluene)], **KF** (23.2 mg, 2.0 equiv), 4-phenyl-1-butene (**1a**) (30.0  $\mu\text{L}$ , 0.20 mmol), **DMMS** (49.3  $\mu\text{L}$ , 0.40 mmol), anhydrous toluene (0.72 mL) and **DMPU** (0.20 mL). The reaction mixture was stirred for 24 h at rt. The crude material was purified by flash column chromatography (0–1% EtOAc in PE) to provide the title compound as a colorless liquid in 66% yield (33.9 mg) with 97:3 rr.

**Rf** 0.2 (2% EtOAc in PE), UV;

**$^1\text{H NMR}$**  (500 MHz,  $\text{CDCl}_3$ )  $\delta$  7.20 (dd,  $J = 8.6, 5.5$  Hz, 2H), 7.16 (d,  $J = 8.6$  Hz, 2H), 6.99 (t,  $J = 8.7$  Hz, 2H), 6.86 (d,  $J = 8.7$  Hz, 2H), 3.88 (t,  $J = 7.9$  Hz, 1H), 3.81 (s, 3H), 2.05 – 1.94 (m, 2H), 1.33 – 1.26 (m, 2H), 0.96 (t,  $J = 7.4$  Hz, 3H);

**$^{13}\text{C NMR}$**  (126 MHz,  $\text{CDCl}_3$ )  $\delta$  161.2 (d,  $J = 243.5$  Hz), 157.9, 141.5 (d,  $J = 3.2$  Hz), 137.3, 129.1 (d,  $J = 7.6$  Hz), 128.7, 115.1 (d,  $J = 20.9$  Hz), 113.8, 55.2, 49.4, 38.2, 21.1, 14.1;

**$^{19}\text{F NMR}$**  (471 MHz,  $\text{CDCl}_3$ )  $\delta$  -117.7;

**HRMS** (ESI) calcd. for  $\text{C}_{17}\text{H}_{20}\text{FO}$   $[\text{M}+\text{H}]^+$   $m/z$  259.1493, found 259.1493;

**IR** (neat,  $\text{cm}^{-1}$ ) 2957, 1506, 1124, 1037, 824;

$[\alpha]_D^{20} = -4.3$  ( $c = 1.4$ ,  $\text{CHCl}_3$ ); 92% *ee*;

**HPLC analysis** CHIRALCEL OJ-H column, 1% EtOH in hexane, 0.5 mL/min, 220 nm UV detector,  $t_R$  (major) = 35.6 min,  $t_R$  (minor) = 40.5 min.

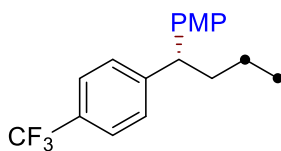

**(R)-1-Methoxy-4-(1-(4-(trifluoromethyl)phenyl)butyl)benzene** (Figure 4, **4h**). From **1-(Prop-1-en-1-yl)-4-(trifluoromethyl)benzene** (40.0 mg, 0.20 mmol), the title compound was prepared following the general procedure **A** using NiCl<sub>2</sub>·glyme (2.2 mg, 5.0 mol%), **L**\* (7.2 mg, 6.0 mol%), **L** [0.17 mg, 0.08 mL (2.1 mg/mL in toluene)], KF (23.2 mg, 2.0 equiv), 4-phenyl-1-butene (**1a**) (30.0 μL, 0.20 mmol), DMMS (49.3 μL, 0.40 mmol), anhydrous toluene (0.72 mL) and DMPU (0.20 mL). The reaction mixture was stirred for 24 h at rt. The crude material was purified by flash column chromatography (0–1% EtOAc in PE) to provide the title compound as a colorless liquid in 70% yield (43.6 mg) with 97:3 rr.

**Rf** 0.3 (2% EtOAc in PE), UV;

<sup>1</sup>H NMR (500 MHz, CDCl<sub>3</sub>) δ 7.55 (d, *J* = 8.2 Hz, 2H), 7.36 (d, *J* = 8.0 Hz, 2H), 7.17 (d, *J* = 8.7 Hz, 2H), 6.87 (d, *J* = 8.7 Hz, 2H), 3.96 (t, *J* = 7.8 Hz, 1H), 3.81 (s, 3H), 2.08 – 1.99 (m, 2H), 1.34 – 1.28 (m, 2H), 0.96 (t, *J* = 7.3 Hz, 3H);

<sup>13</sup>C NMR (126 MHz, CDCl<sub>3</sub>) δ 158.1, 149.9, 136.4, 128.8, 128.1, 125.3 (q, *J* = 3.6 Hz), 122.2 (q, *J* = 271.7 Hz), 113.9, 55.2, 50.1, 37.8, 21.1, 14.0;

<sup>19</sup>F NMR (471 MHz, CDCl<sub>3</sub>) δ –62.3;

**HRMS** (ESI) calcd. for C<sub>18</sub>H<sub>19</sub>F<sub>3</sub>NaO [M+Na]<sup>+</sup> *m/z* 331.1280, found 331.1283;

**IR** (neat, cm<sup>-1</sup>) 2959, 1510, 1323, 1117, 824;

[α]<sub>D</sub><sup>20</sup> = –8.9 (*c* = 1.5, CHCl<sub>3</sub>); 92% *ee*;

**HPLC analysis** CHIRALCEL AD-H column, 1% <sup>i</sup>PrOH in hexane, 0.5 mL/min, 220 nm UV detector, *t*<sub>R</sub> (minor) = 8.4 min, *t*<sub>R</sub> (major) = 8.8 min.

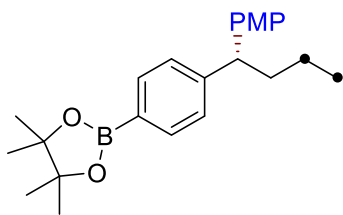

**(R)-2-(4-(1-(4-methoxyphenyl)butyl)phenyl)-4,4,5,5-tetramethyl-1,3,2-dioxaborolane** (Figure 4, **4i**). From **2-(4-(But-3-en-1-yl)phenyl)-4,4,5,5-tetramethyl-1,3,2-dioxaborolane** (51.6 mg, 0.20 mmol), the title compound was prepared following the general procedure **A** using NiCl<sub>2</sub>·glyme (2.2 mg, 5.0 mol%), **L**\* (7.2 mg, 6.0 mol%), **L** [0.17 mg, 0.08 mL (2.1 mg/mL in toluene)], KF (23.2 mg, 2.0 equiv), 4-phenyl-1-butene

(**1a**) (30.0  $\mu$ L, 0.20 mmol), DMMS (49.3  $\mu$ L, 0.40 mmol), anhydrous toluene (0.72 mL) and DMPU (0.20 mL). The reaction mixture was stirred for 24 h at rt. The crude material was purified by flash column chromatography (0–1% EtOAc in PE) to provide the title compound as a colorless liquid in 43% yield (31.4 mg) with 97:3 rr.

**Rf** 0.2 (2% EtOAc in PE), UV;

**$^1$ H NMR** (500 MHz, CDCl<sub>3</sub>)  $\delta$  7.76 (d,  $J$  = 7.9 Hz, 2H), 7.27 (d,  $J$  = 7.9 Hz, 2H), 7.17 (d,  $J$  = 8.6 Hz, 2H), 6.84 (d,  $J$  = 8.7 Hz, 2H), 3.91 (t,  $J$  = 7.8 Hz, 1H), 3.81 – 3.77 (m, 3H), 2.08 – 1.98 (m, 2H), 1.35 (s, 12H), 1.32 – 1.26 (m, 2H), 0.94 (t,  $J$  = 7.4 Hz, 3H);

**$^{13}$ C NMR** (126 MHz, CDCl<sub>3</sub>)  $\delta$  157.8, 149.1, 137.3, 134.9, 128.8, 127.3, 113.7, 83.6, 55.2, 50.4, 37.9, 24.9, 21.1, 14.1;

**HRMS** (ESI) calcd. for C<sub>23</sub>H<sub>31</sub>BNaO<sub>3</sub> [M+Na]<sup>+</sup>  $m/z$  389.2258, found 389.2253;

**IR** (neat, cm<sup>-1</sup>) 2975, 1358, 1087, 658;

**$[\alpha]_D^{20}$**  = -0.3 ( $c$  = 1.5, CHCl<sub>3</sub>); 92% *ee*;

**HPLC analysis** CHIRALCEL ID-3 column, 3% EtOH in hexane, 0.4 mL/min, 220 nm UV detector,  $t_R$  (minor) = 10.0 min,  $t_R$  (major) = 11.1 min.

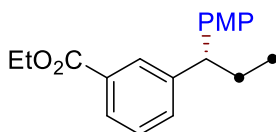

**Ethyl (S)-3-(1-(4-methoxyphenyl)propyl)benzoate** (Figure 4, **4j**). From **Ethyl 3-allylbenzoate** (38.0 mg, 0.20 mmol), the title compound was prepared following the general procedure **A** using NiCl<sub>2</sub>·glyme (2.2 mg, 5.0 mol%), **L\*** (7.2 mg, 6.0 mol%), **L** [0.17 mg, 0.08 mL (2.1 mg/mL in toluene)], KF (23.2 mg, 2.0 equiv), 4-phenyl-1-butene (**1a**) (30.0  $\mu$ L, 0.20 mmol), DMMS (49.3  $\mu$ L, 0.40 mmol), anhydrous toluene (0.72 mL) and DMPU (0.20 mL). The reaction mixture was stirred for 24 h at rt. The crude material was purified by flash column chromatography (0–5% EtOAc in PE) to provide the title compound as a colorless liquid in 73% yield (43.7 mg) with 96:4 rr.

**Rf** 0.4 (5% EtOAc in PE), UV;

**$^1$ H NMR** (500 MHz, CDCl<sub>3</sub>)  $\delta$  7.97 (s, 1H), 7.88 (d,  $J$  = 7.6 Hz, 1H), 7.42 (d,  $J$  = 7.8 Hz, 1H), 7.36 (t,  $J$  = 7.7 Hz, 1H), 7.18 (d,  $J$  = 8.7 Hz, 2H), 6.86 (d,  $J$  = 8.7 Hz, 2H), 4.39 (q,  $J$

= 7.1 Hz, 2H), 3.83 (t,  $J = 7.8$  Hz, 1H), 3.79 (s, 3H), 2.15 – 2.05 (m, 2H), 1.42 (t,  $J = 7.2$  Hz, 3H), 0.92 (t,  $J = 7.3$  Hz, 3H);

$^{13}\text{C}$  NMR (126 MHz,  $\text{CDCl}_3$ )  $\delta$  166.8, 157.9, 145.9, 136.7, 132.4, 130.5, 128.9, 128.7, 128.4, 127.2, 113.8, 60.9, 55.2, 52.2, 28.6, 14.3, 12.7;

HRMS (ESI) calcd. for  $\text{C}_{19}\text{H}_{22}\text{NaO}_3$   $[\text{M}+\text{Na}]^+$   $m/z$  321.1461, found 321.1463;

IR (neat,  $\text{cm}^{-1}$ ) 2967, 1714, 1510, 1246, 756;

$[\alpha]_{\text{D}}^{20} = -3.2$  ( $c = 1.9$ ,  $\text{CHCl}_3$ ); 86% *ee*;

HPLC analysis CHIRALCEL AD-H column, 5% *i*PrOH in hexane, 0.8 mL/min, 220 nm UV detector,  $t_{\text{R}}$  (minor) = 7.2 min,  $t_{\text{R}}$  (major) = 7.8 min.

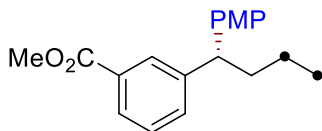

**Methyl (S)-3-(1-(4-methoxyphenyl)butyl)benzoate** (Figure 4, **4k**). From **Methyl 3-(but-3-en-1-yl)benzoate** (38.0 mg, 0.20 mmol), the title compound was prepared following the general procedure **A** using  $\text{NiCl}_2 \cdot \text{glyme}$  (2.2 mg, 5.0 mol%), **L\*** (7.2 mg, 6.0 mol%), **L** [0.17 mg, 0.08 mL (2.1 mg/mL in toluene)], KF (23.2 mg, 2.0 equiv), 4-phenyl-1-butene (**1a**) (30.0  $\mu\text{L}$ , 0.20 mmol), DMMS (49.3  $\mu\text{L}$ , 0.40 mmol), anhydrous toluene (0.72 mL) and DMPU (0.20 mL). The reaction mixture was stirred for 24 h at rt. The crude material was purified by flash column chromatography (0–4% EtOAc in PE) to provide the title compound as a colorless liquid in 68% yield (40.4 mg) with 97:3 rr.

*Rf* 0.4 (4% EtOAc in PE), UV;

$^1\text{H}$  NMR (500 MHz,  $\text{CDCl}_3$ )  $\delta$  7.97 (s, 1H), 7.88 (d,  $J = 7.7$  Hz, 1H), 7.44 (d,  $J = 7.7$  Hz, 1H), 7.36 (t,  $J = 7.7$  Hz, 1H), 7.19 (d,  $J = 8.7$  Hz, 2H), 6.86 (d,  $J = 8.7$  Hz, 2H), 3.99 – 3.92 (m, 4H), 3.79 (s, 3H), 2.10 – 2.01 (m, 2H), 1.38 – 1.23 (m, 2H), 0.96 (t,  $J = 7.3$  Hz, 3H);

$^{13}\text{C}$  NMR (126 MHz,  $\text{CDCl}_3$ )  $\delta$  167.2, 158.0, 146.2, 136.8, 132.5, 130.2, 128.8, 128.7, 128.4, 127.3, 113.9, 55.1, 52.0, 50.1, 37.9, 21.1, 14.0;

HRMS (ESI) calcd. for  $\text{C}_{19}\text{H}_{23}\text{O}_3$   $[\text{M}+\text{H}]^+$   $m/z$  299.1642, found 299.1637;

IR (neat,  $\text{cm}^{-1}$ ) 2955, 1719, 1509, 1246, 1035, 750;

$[\alpha]_{\text{D}}^{20} = -0.4$  ( $c = 2.0$ ,  $\text{CHCl}_3$ ); 89% *ee*;

**HPLC analysis** CHIRALCEL AD-H column, 5% *i*PrOH in hexane, 0.8 mL/min, 220 nm UV detector,  $t_R$  (minor) = 7.2 min,  $t_R$  (major) = 7.6 min.

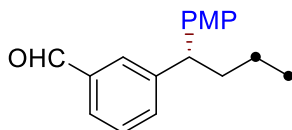

**(S)-3-(1-(4-Methoxyphenyl)butyl)benzaldehyde** (Figure 4, **4l**). From **3-(But-3-en-1-yl)benzaldehyde** (32.0 mg, 0.20 mmol), the title compound was prepared following the general procedure **A** using NiCl<sub>2</sub>·glyme (2.2 mg, 5.0 mol%), **L\*** (7.2 mg, 6.0 mol%), **L** [0.17 mg, 0.08 mL (2.1 mg/mL in toluene)], KF (23.2 mg, 2.0 equiv), 4-phenyl-1-butene (**1a**) (30.0 μL, 0.20 mmol), DMMS (49.3 μL, 0.40 mmol), anhydrous toluene (0.72 mL) and DMPU (0.20 mL). The reaction mixture was stirred for 24 h at rt. The crude material was purified by flash column chromatography (0–3% EtOAc in PE) to provide the title compound as a colorless liquid in 51% yield (27.5 mg) with 96:4 rr.

**Rf** 0.3 (4% EtOAc in PE), UV;

**<sup>1</sup>H NMR** (500 MHz, CDCl<sub>3</sub>) δ 10.00 (s, 1H), 7.78 (s, 1H), 7.70 (d,  $J = 7.4$  Hz, 1H), 7.52 (d,  $J = 7.6$  Hz, 1H), 7.46 (t,  $J = 7.6$  Hz, 1H), 7.18 (d,  $J = 8.7$  Hz, 2H), 6.86 (d,  $J = 8.7$  Hz, 2H), 3.97 (t,  $J = 7.8$  Hz, 1H), 3.80 (s, 3H), 2.11 – 2.00 (m, 2H), 1.37 – 1.23 (m, 2H), 0.96 (t,  $J = 7.4$  Hz, 3H);

**<sup>13</sup>C NMR** (126 MHz, CDCl<sub>3</sub>) δ 192.6, 158.1, 147.0, 136.6, 136.5, 134.2, 129.1, 128.7, 128.6, 127.9, 113.9, 55.2, 49.9, 37.9, 21.1, 14.0;

**HRMS** (ESI) calcd. for C<sub>18</sub>H<sub>21</sub>O<sub>2</sub> [M+H]<sup>+</sup>  $m/z$  269.1536, found 269.1534;

**IR** (neat, cm<sup>-1</sup>) 2957, 1694, 1509, 1245, 1035;

**[α]<sub>D</sub><sup>20</sup>** = +3.6 ( $c = 1.0$ , CHCl<sub>3</sub>); 86% *ee*;

**HPLC analysis** CHIRALCEL IG-3 column, 5% *i*PrOH in hexane, 0.5 mL/min, 220 nm UV detector,  $t_R$  (minor) = 15.6 min,  $t_R$  (major) = 16.3 min.

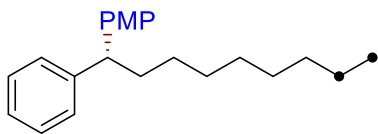

**(R)-1-methoxy-4-(1-phenylnonyl)benzene** (Figure 4, **4m**). From **Non-8-en-1-ylbenzene** (40.9 mg, 0.20 mmol), the title compound was prepared following the general procedure

**A** using NiCl<sub>2</sub>·glyme (2.2 mg, 5.0 mol%), **L**\* (7.2 mg, 6.0 mol%), **L** [0.42 mg, 0.2 mL (2.1 mg/mL in toluene)], KF (23.2 mg, 2.0 equiv), 4-iodoanisole (94.0 mg, 0.40 mmol, 2.0 equiv), DMMS (49.3 μL, 0.40 mmol), anhydrous toluene (0.60 mL) and DMPU (0.20 mL). The reaction mixture was stirred for 24 h at rt. The crude material was purified by flash column chromatography (0–1% EtOAc in PE) to provide the title compound as a colorless liquid in 38% yield (23.7 mg) with 96:4 rr.

**Rf** 0.2 (2% EtOAc in PE), UV;

<sup>1</sup>H NMR (500 MHz, CDCl<sub>3</sub>) δ 7.30 – 7.23 (m, 4H), 7.21 – 7.15 (m, 3H), 6.84 (d, *J* = 8.6 Hz, 2H), 3.86 (t, *J* = 7.7 Hz, 1H), 3.79 (s, 3H), 2.06 – 1.98 (m, 2H), 1.32 – 1.22 (m, 12H), 0.89 (t, *J* = 7.0 Hz, 3H);

<sup>13</sup>C NMR (126 MHz, CDCl<sub>3</sub>) δ 157.8, 145.8, 137.6, 128.7, 128.3, 127.8, 125.9, 113.7, 55.2, 50.5, 35.9, 31.9, 29.7, 29.5, 29.3, 28.1, 22.7, 14.1;

**HRMS** (ESI) calcd. for C<sub>22</sub>H<sub>30</sub>NaO [M+Na]<sup>+</sup> *m/z* 333.2189, found 333.2188;

**IR** (neat, cm<sup>-1</sup>) 2923, 1510, 1246, 1039, 698;

[α]<sub>D</sub><sup>20</sup> = –4.0 (*c* = 0.5, CHCl<sub>3</sub>); 96% *ee*;

**HPLC analysis** CHIRALCEL OJ-H\*2 column, 1% EtOH in hexane, 0.5 mL/min, 220 nm UV detector, *t*<sub>R</sub> (minor) = 28.6 min, *t*<sub>R</sub> (major) = 30.5 min.

**Note:**

Using **L** [0.84 mg, 0.4 mL (2.1 mg/mL in toluene)] and anhydrous toluene (0.40 mL), the title compound was prepared following the general procedure **A**, and the crude material was purified by flash column chromatography (0–1% EtOAc in PE) to provide the title compound as a colorless liquid in 57% yield (35.2 mg) with 93% *ee*.

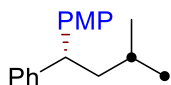

**(R)-1-Methoxy-4-(3-methyl-1-phenylbutyl)benzene** (Figure 4, **4n**)<sup>2</sup>. From **(3-Methylbut-3-en-1-yl)benzene** (29.4 mg, 0.20 mmol), the title compound was prepared following the general procedure **A** using NiCl<sub>2</sub>·glyme (2.2 mg, 5.0 mol%), **L**\* (7.2 mg, 6.0 mol%), **L** [0.42 mg, 0.2 mL (2.1 mg/mL in toluene)], KF (23.2 mg, 2.0 equiv), 4-iodoanisole (94.0 mg, 0.40 mmol, 2.0 equiv), DMMS (49.3 μL, 0.40 mmol), anhydrous toluene (0.60 mL) and DMPU (0.20 mL). The reaction mixture was stirred for 24 h at rt.

The crude material was purified by flash column chromatography (0–1% EtOAc in PE) to provide the title compound as a colorless liquid in 41% yield (20.5 mg) with 99:1 rr.

**Rf** 0.3 (2% EtOAc in PE), UV;

**<sup>1</sup>H NMR** (500 MHz, CDCl<sub>3</sub>) δ 7.32 – 7.25 (m, 4H), 7.19 (d, *J* = 8.6 Hz, 3H), 6.85 (d, *J* = 8.7 Hz, 2H), 4.00 (t, *J* = 8.0 Hz, 1H), 3.80 (s, 3H), 1.96 – 1.89 (m, 2H), 1.52 – 1.43 (m, 1H), 0.95 (d, *J* = 6.7 Hz, 6H);

**<sup>13</sup>C NMR** (126 MHz, CDCl<sub>3</sub>) δ 157.8, 145.8, 137.5, 128.8, 128.4, 127.8, 125.9, 113.8, 55.2, 48.0, 45.2, 25.5, 22.7, 22.6;

**HRMS** (ESI) calcd. for C<sub>18</sub>H<sub>22</sub>NaO [M+Na]<sup>+</sup> *m/z* 277.1563, found 277.1564;

**IR** (neat, cm<sup>-1</sup>) 2954, 1509, 1246, 1038, 697;

[α]<sub>D</sub><sup>20</sup> = -7.5 (*c* = 1.0, CHCl<sub>3</sub>); 94% *ee*;

**HPLC analysis** CHIRALCEL OJ-H column, 20% *i*PrOH in hexane, 0.5 mL/min, 220 nm UV detector, *t*<sub>R</sub> (major) = 10.7 min, *t*<sub>R</sub> (minor) = 11.6 min.

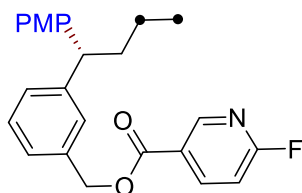

**(S)-3-(1-(4-Methoxyphenyl)butyl)benzyl 6-fluoronicotinate** (Figure 4, **4o**). From **3-(But-3-en-1-yl)benzyl 6-fluoronicotinate** (57.1 mg, 0.20 mmol), the title compound was prepared following the general procedure **A** using NiCl<sub>2</sub>·glyme (2.2 mg, 5.0 mol%), **L\*** (7.2 mg, 6.0 mol%), **L** [0.42 mg, 0.2 mL (2.1 mg/mL in toluene)], KF (23.2 mg, 2.0 equiv), 4-iodoanisole (94.0 mg, 0.40 mmol, 2.0 equiv), DMMS (49.3 μL, 0.40 mmol), anhydrous toluene (0.60 mL) and DMPU (0.20 mL). The reaction mixture was stirred for 24 h at rt. The crude material was purified by flash column chromatography (0–5% EtOAc in PE) to provide the title compound as a colorless liquid in 79% yield (61.9 mg) with 98:2 rr.

**Rf** 0.5 (20% EtOAc in PE), UV;

**<sup>1</sup>H NMR** (500 MHz, CDCl<sub>3</sub>) δ 8.93 (s, 1H), 8.46 – 8.38 (m, 1H), 7.37 – 7.24 (m, 4H), 7.19 (d, *J* = 8.7 Hz, 2H), 7.02 (dd, *J* = 8.5, 2.8 Hz, 1H), 6.86 (d, *J* = 8.7 Hz, 2H), 5.37 (s,



2H), 3.93 (t,  $J = 7.8$  Hz, 1H), 3.80 (s, 3H), 2.09 – 1.98 (m, 2H), 1.37 – 1.28 (m, 2H), 0.96 (t,  $J = 7.3$  Hz, 3H);

$^{13}\text{C}$  NMR (126 MHz,  $\text{CDCl}_3$ )  $\delta$  165.9 (d,  $J = 245.7$  Hz), 164.1, 157.9, 150.5 (d,  $J = 16.3$  Hz), 146.5, 142.7 (d,  $J = 9.3$  Hz), 137.0, 135.3, 128.8, 128.8, 127.9, 127.8, 125.9, 124.5 (d,  $J = 4.5$  Hz), 113.8, 109.6 (d,  $J = 37.5$  Hz), 67.1, 55.2, 50.1, 38.1, 21.2, 14.1;

$^{19}\text{F}$  NMR (471 MHz,  $\text{CDCl}_3$ )  $\delta$  -61.1;

HRMS (ESI) calcd. for  $\text{C}_{24}\text{H}_{24}\text{FNNaO}_3$   $[\text{M}+\text{Na}]^+$   $m/z$  416.1632, found 416.1633;

IR (neat,  $\text{cm}^{-1}$ ) 2958, 1721, 1510, 1246, 1109, 775;

$[\alpha]_{\text{D}}^{20} = -6.5$  ( $c = 2.3$ ,  $\text{CHCl}_3$ ); 92% *ee*;

HPLC analysis CHIRALCEL OJ-H column, 10% *i*PrOH in hexane, 0.8 mL/min, 220 nm UV detector,  $t_{\text{R}}$  (major) = 30.7 min,  $t_{\text{R}}$  (minor) = 35.1 min.

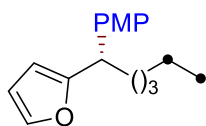

(*S*)-2-(1-(4-Methoxyphenyl)hexyl)furan (Figure 4, **4p**). From 2-(Hex-5-en-1-yl)furan (30.0 mg, 0.20 mmol), the title compound was prepared following the general procedure **A** using  $\text{NiCl}_2 \cdot \text{glyme}$  (2.2 mg, 5.0 mol%), **L\*** (7.2 mg, 6.0 mol%), **L** [0.17 mg, 0.08 mL (2.1 mg/mL in toluene)], KF (23.2 mg, 2.0 equiv), 4-phenyl-1-butene (**1a**) (30.0  $\mu\text{L}$ , 0.20 mmol), DMMS (49.3  $\mu\text{L}$ , 0.40 mmol), anhydrous toluene (0.72 mL) and DMPU (0.20 mL). The reaction mixture was stirred for 24 h at rt. The crude material was purified by flash column chromatography (0–2% EtOAc in PE) to provide the title compound as a colorless liquid in 42% yield (21.9 mg) with 96:4 *rr*.

*Rf* 0.4 (5% EtOAc in PE), UV;

$^1\text{H}$  NMR (500 MHz,  $\text{CDCl}_3$ )  $\delta$  7.33 (s, 1H), 7.17 (d,  $J = 8.7$  Hz, 2H), 6.87 (d,  $J = 8.7$  Hz, 2H), 6.30 (dd,  $J = 3.2, 1.9$  Hz, 1H), 6.05 (d,  $J = 3.1$  Hz, 1H), 3.89 (t,  $J = 7.7$  Hz, 1H), 3.81 (s, 3H), 2.14 – 2.04 (m, 1H), 1.92 – 1.83 (m, 1H), 1.34 – 1.27 (m, 6H), 0.89 (t,  $J = 6.7$  Hz, 3H);

$^{13}\text{C}$  NMR (126 MHz,  $\text{CDCl}_3$ )  $\delta$  158.7, 158.1, 141.1, 135.1, 128.8, 113.8, 113.7, 109.9, 104.9, 55.2, 44.5, 34.8, 31.7, 27.3, 22.5, 14.1;

HRMS (ESI) calcd. for  $\text{C}_{17}\text{H}_{22}\text{NaO}_2$   $[\text{M}+\text{Na}]^+$   $m/z$  281.1512, found 281.1511;

IR (neat,  $\text{cm}^{-1}$ ) 2926, 1510, 1244, 1037, 726;

$[\alpha]_D^{20} = +35.3$  ( $c = 0.9$ ,  $\text{CHCl}_3$ ); 90% *ee*;

**HPLC analysis** CHIRALCEL OJ-H column, 20% *i*PrOH in hexane, 0.5 mL/min, 220 nm UV detector,  $t_R$  (minor) = 11.7 min,  $t_R$  (major) = 13.5 min.

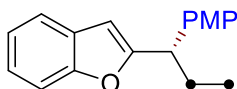

**(S)-2-(1-(4-Methoxyphenyl)propyl)benzofuran** (Figure 4, **4q**). From **2-Allylbenzofuran** (31.6 mg, 0.20 mmol), the title compound was prepared following the general procedure **A** using  $\text{NiCl}_2 \cdot \text{glyme}$  (2.2 mg, 5.0 mol%), **L\*** (7.2 mg, 6.0 mol%), **L** [0.17 mg, 0.08 mL (2.1 mg/mL in toluene)], KF (23.2 mg, 2.0 equiv), 4-phenyl-1-butene (**1a**) (30.0  $\mu\text{L}$ , 0.20 mmol), DMMS (49.3  $\mu\text{L}$ , 0.40 mmol), anhydrous toluene (0.72 mL) and DMPU (0.20 mL). The reaction mixture was stirred for 24 h at rt. The crude material was purified by flash column chromatography (0–3% EtOAc in PE) to provide the title compound as a colorless liquid in 52% yield (27.9 mg) with 97:3 rr.

**Rf** 0.4 (5% EtOAc in PE), UV;

**$^1\text{H}$  NMR** (500 MHz,  $\text{CDCl}_3$ )  $\delta$  7.53 (d,  $J = 6.8$  Hz, 1H), 7.44 (d,  $J = 7.7$  Hz, 1H), 7.27 (d,  $J = 8.6$  Hz, 2H), 7.24 – 7.19 (m, 2H), 6.90 (d,  $J = 8.7$  Hz, 2H), 6.47 (s, 1H), 3.95 (t,  $J = 7.7$  Hz, 1H), 3.83 (s, 3H), 2.33 – 2.24 (m, 1H), 2.06 – 1.96 (m, 1H), 0.99 (t,  $J = 7.4$  Hz, 3H);

**$^{13}\text{C}$  NMR** (126 MHz,  $\text{CDCl}_3$ )  $\delta$  161.7, 158.4, 154.8, 134.3, 129.0, 128.7, 123.3, 122.4, 120.4, 113.9, 110.9, 102.2, 55.3, 46.7, 27.7, 12.4;

**HRMS** (ESI) calcd. for  $\text{C}_{18}\text{H}_{19}\text{O}_2$   $[\text{M}+\text{H}]^+$   $m/z$  267.1380, found 267.1381;

**IR** (neat,  $\text{cm}^{-1}$ ) 2966, 1510, 1247, 1037, 740;

$[\alpha]_D^{20} = +33.7$  ( $c = 1.3$ ,  $\text{CHCl}_3$ ); 84% *ee*;

**HPLC analysis** CHIRALCEL OJ-H column, 20% *i*PrOH in hexane, 0.5 mL/min, 220 nm UV detector,  $t_R$  (minor) = 16.7 min,  $t_R$  (major) = 20.8 min.

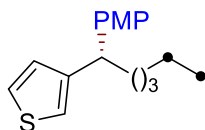

**(S)-3-(1-(4-Methoxyphenyl)hexyl)thiophene** (Figure 4, **4r**)<sup>1</sup>. From **3-(Hex-5-en-1-yl)thiophene** (33.3 mg, 0.20 mmol), the title compound was prepared following the general procedure **A** using NiCl<sub>2</sub>·glyme (2.2 mg, 5.0 mol%), **L\*** (7.2 mg, 6.0 mol%), **L** [0.42 mg, 0.2 mL (2.1 mg/mL in toluene)], KF (23.2 mg, 2.0 equiv), 4-iodoanisole (94.0 mg, 0.40 mmol, 2.0 equiv), DMMS (49.3 μL, 0.40 mmol), anhydrous toluene (0.60 mL) and DMPU (0.20 mL). The reaction mixture was stirred for 24 h at rt. The crude material was purified by flash column chromatography (0–1% EtOAc in PE) to provide the title compound as a colorless liquid in 52% yield (28.4 mg) with 98:2 rr.

**Rf** 0.2 (2% EtOAc in PE), UV;

<sup>1</sup>H NMR (500 MHz, CDCl<sub>3</sub>) δ 7.25 (dd, *J* = 5.0, 2.9 Hz, 1H), 7.16 (d, *J* = 8.7 Hz, 2H), 6.99 (d, *J* = 2.9 Hz, 1H), 6.93 (d, *J* = 3.6 Hz, 1H), 6.87 (d, *J* = 8.7 Hz, 2H), 3.93 (t, *J* = 7.7 Hz, 1H), 3.82 (s, 3H), 2.12 – 2.01 (m, 1H), 2.01 – 1.91 (m, 1H), 1.35 – 1.27 (m, 6H), 0.90 (t, *J* = 6.7 Hz, 3H);

<sup>13</sup>C NMR (126 MHz, CDCl<sub>3</sub>) δ 157.9, 146.9, 137.2, 128.7, 127.8, 125.3, 119.7, 113.7, 55.2, 46.1, 36.3, 31.8, 27.6, 22.6, 14.1;

**HRMS** (ESI) calcd. for C<sub>17</sub>H<sub>22</sub>NaOS [M+Na]<sup>+</sup> *m/z* 297.1284, found 297.1280;

**IR** (neat, cm<sup>-1</sup>) 2925, 1609, 1509, 1243, 1037, 827;

[α]<sub>D</sub><sup>20</sup> = +44.2 (*c* = 1.1, CHCl<sub>3</sub>); 94% *ee*;

**HPLC analysis** CHIRALCEL OJ-H column, 30% *i*PrOH in hexane, 0.8 mL/min, 220 nm UV detector, *t*<sub>R</sub> (minor) = 7.7 min, *t*<sub>R</sub> (major) = 9.5 min.

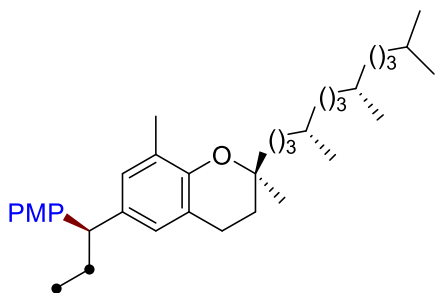

**(S)-6-((S)-1-(4-Methoxyphenyl)propyl)-2,8-dimethyl-2-((4S,8S)-4,8,12-trimethyltridecyl)chromane** (Figure 4, **4s**). From **(S)-6-Allyl-2,8-dimethyl-2-((4S,8S)-4,8,12-trimethyltridecyl)chromane** (85.3 mg, 0.20 mmol), the title compound was prepared following the general procedure **A** using NiCl<sub>2</sub>·glyme (2.2 mg, 5.0 mol%), **L\***

(7.2 mg, 6.0 mol%), **L** [0.42 mg, 0.2 mL (2.1 mg/mL in toluene)], KF (23.2 mg, 2.0 equiv), 4-iodoanisole (94.0 mg, 0.40 mmol, 2.0 equiv), DMMS (49.3  $\mu$ L, 0.40 mmol), anhydrous toluene (0.60 mL) and DMPU (0.20 mL). The reaction mixture was stirred for 24 h at rt. The crude material was purified by flash column chromatography (0–1% EtOAc in PE) to provide the title compound as a colorless liquid in 88% yield (94.0 mg) with >99:1 rr.

**Rf** 0.2 (2% EtOAc in PE), UV;

**<sup>1</sup>H NMR** (500 MHz, CDCl<sub>3</sub>)  $\delta$  7.18 (d,  $J$  = 8.6 Hz, 2H), 6.85 (d,  $J$  = 8.6 Hz, 2H), 6.82 (s, 1H), 6.75 (s, 1H), 3.80 (s, 3H), 3.62 (t,  $J$  = 7.8 Hz, 1H), 2.76 – 2.68 (m, 2H), 2.14 (s, 3H), 2.05 – 1.96 (m, 2H), 1.81 (dt,  $J$  = 13.8, 7.0 Hz, 1H), 1.74 (dt,  $J$  = 13.2, 6.4 Hz, 1H), 1.60 – 1.55 (m, 3H), 1.48 – 1.35 (m, 5H), 1.33 – 1.26 (m, 9H), 1.21 – 1.05 (m, 7H), 0.90 (d,  $J$  = 6.7 Hz, 9H), 0.88 (d,  $J$  = 2.6 Hz, 3H), 0.87 (d,  $J$  = 2.8 Hz, 3H);

**<sup>13</sup>C NMR** (126 MHz, CDCl<sub>3</sub>)  $\delta$  157.6, 150.3, 138.2, 135.7, 128.7, 127.7, 125.8, 119.9, 113.6, 75.8, 55.2, 51.7, 40.3, 39.4, 37.5, 37.4, 37.3, 32.8, 32.7, 31.3, 29.1, 28.0, 24.8, 24.5, 24.3, 24.3, 22.8, 22.7, 22.5, 21.0, 19.8, 19.7, 16.2, 13.0;

**HRMS** (ESI) calcd. for C<sub>37</sub>H<sub>58</sub>NaO<sub>2</sub> [M+Na]<sup>+</sup>  $m/z$  557.4329, found 557.4332;

**IR** (neat, cm<sup>-1</sup>) 2923, 1510, 1244, 1041, 828;

**$[\alpha]_D^{20}$**  = +6.5 ( $c$  = 4.5, CHCl<sub>3</sub>); >20:1 dr.

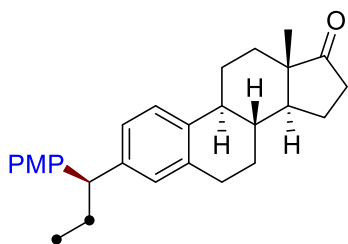

**(8R,9S,13S,14S)-3-((S)-1-(4-Methoxyphenyl)propyl)-13-methyl-6,7,8,9,11,12,13,14,15,16-decahydro-17H-cyclopenta[*a*]phenanthren-17-one** (Figure 4, 4t). From **(8R,9S,13S,14S)-3-Allyl-13-methyl-6,7,8,9,11,12,13,14,15,16-decahydro-17H-cyclopenta[*a*]phenanthren-17-one** (58.9 mg, 0.20 mmol), the title compound was prepared following the general procedure **A** using NiCl<sub>2</sub>·glyme (2.2 mg, 5.0 mol%), **L\*** (7.2 mg, 6.0 mol%), **L** [0.17 mg, 0.08 mL (2.1 mg/mL in toluene)], KF (23.2 mg, 2.0 equiv), 4-phenyl-1-butene (**1a**) (30.0  $\mu$ L, 0.20 mmol), DMMS (49.3  $\mu$ L, 0.40 mmol),

anhydrous toluene (0.72 mL) and DMPU (0.20 mL). The reaction mixture was stirred for 24 h at rt. The crude material was purified by flash column chromatography (0–1% EtOAc in PE) to provide the title compound as a white solid in 82% yield (66.3 mg) with >99:1 rr.

**Rf** 0.2 (2% EtOAc in PE), UV;

**<sup>1</sup>H NMR** (500 MHz, CDCl<sub>3</sub>) δ 7.22 (d, *J* = 8.1 Hz, 1H), 7.19 (d, *J* = 8.7 Hz, 2H), 7.05 (d, *J* = 8.1 Hz, 1H), 6.97 (s, 1H), 6.86 (d, *J* = 8.7 Hz, 2H), 3.80 (s, 3H), 3.71 (t, *J* = 7.8 Hz, 1H), 2.94 – 2.87 (m, 2H), 2.53 (dd, *J* = 19.0, 8.7 Hz, 1H), 2.47 – 2.39 (m, 1H), 2.29 (t, *J* = 13.0 Hz, 1H), 2.21 – 2.13 (m, 1H), 2.11 – 2.00 (m, 4H), 1.98 (d, *J* = 11.8 Hz, 1H), 1.69 – 1.58 (m, 2H), 1.58 – 1.39 (m, 4H), 0.97 – 0.87 (m, 6H);

**<sup>13</sup>C NMR** (126 MHz, CDCl<sub>3</sub>) δ 221.1, 157.8, 143.1, 137.4, 137.3, 136.3, 128.8, 128.4, 125.3, 125.1, 113.8, 55.2, 52.0, 50.6, 48.0, 44.3, 38.2, 35.9, 31.6, 29.7, 29.5, 28.8, 26.6, 25.7, 21.6, 13.9, 12.9;

**HRMS** (ESI) calcd. for C<sub>28</sub>H<sub>34</sub>NaO<sub>2</sub> [M+Na]<sup>+</sup> *m/z* 425.2451, found 425.2451;

**IR** (neat, cm<sup>-1</sup>) 3674, 2920, 1734, 1250, 1051;

**m.p.** 103.8 – 105.3 °C;

[α]<sub>D</sub><sup>20</sup> = +123.5 (*c* = 2.1, CHCl<sub>3</sub>); >20:1 dr;

**HPLC analysis** CHIRALCEL AD-H column, 10% EtOH in hexane, 1.0 mL/min, 220 nm UV detector, *t*<sub>R</sub> (minor) = 8.4 min, *t*<sub>R</sub> (major) = 11.0 min.

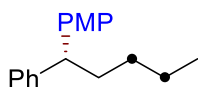

**(R)-1-Methoxy-4-(1-phenylpentyl)benzene** (Figure 4, **4u**). From **Pent-3-en-1-ylbenzene** (29.2 mg, 0.20 mmol), the title compound was prepared following the general procedure **A** using NiCl<sub>2</sub>·glyme (2.2 mg, 5.0 mol%), **L\*** (7.2 mg, 6.0 mol%), **L** [0.42 mg, 0.2 mL (2.1 mg/mL in toluene)], KF (23.2 mg, 2.0 equiv), 4-iodoanisole (94.0 mg, 0.40 mmol, 2.0 equiv), DMMS (49.3 μL, 0.40 mmol), anhydrous toluene (0.60 mL) and DMPU (0.20 mL). The reaction mixture was stirred for 24 h at rt. The crude material was purified by flash column chromatography (0–1% EtOAc in PE) to provide the title compound as a colorless liquid in 80% yield (40.8 mg) with >99:1 rr.

**Rf** 0.2 (2% EtOAc in PE), UV;

**<sup>1</sup>H NMR** (500 MHz, CDCl<sub>3</sub>) δ 7.34 – 7.25 (m, 4H), 7.25 – 7.16 (m, 3H), 6.87 (d, *J* = 8.6 Hz, 2H), 3.89 (t, *J* = 7.8 Hz, 1H), 3.81 (s, 3H), 2.10 – 2.02 (m, 2H), 1.43 – 1.35 (m, 2H), 1.32 – 1.26 (m, 2H), 0.92 (t, *J* = 7.3 Hz, 3H);

**<sup>13</sup>C NMR** (126 MHz, CDCl<sub>3</sub>) δ 157.8, 145.8, 137.6, 128.8, 128.4, 127.8, 125.9, 113.8, 55.2, 50.5, 35.7, 30.3, 22.8, 14.1;

**HRMS** (ESI) calcd. for C<sub>18</sub>H<sub>23</sub>O [M+H]<sup>+</sup> *m/z* 255.1743, found 255.1738;

**IR** (neat, cm<sup>-1</sup>) 2927, 1322, 1116, 1017, 698;

[α]<sub>D</sub><sup>20</sup> = -5.9 (*c* = 1.6, CHCl<sub>3</sub>); 95% *ee*;

**HPLC analysis** CHIRALCEL OJ-H column, 1% EtOH in hexane, 0.5 mL/min, 220 nm UV detector, *t*<sub>R</sub> (minor) = 20.4 min, *t*<sub>R</sub> (major) = 22.4 min.

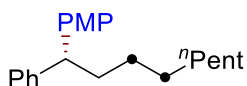

**(*R*)-1-Methoxy-4-(1-phenylnonyl)benzene** (Figure 4, **4v**)<sup>1</sup>. From **Non-3-en-1-ylbenzene** (40.9 mg, 0.20 mmol), the title compound was prepared following the general procedure **A** using NiCl<sub>2</sub>·glyme (2.2 mg, 5.0 mol%), **L**\* (7.2 mg, 6.0 mol%), **L** [0.42 mg, 0.2 mL (2.1 mg/mL in toluene)], KF (23.2 mg, 2.0 equiv), 4-iodoanisole (94.0 mg, 0.40 mmol, 2.0 equiv), DMMS (49.3 μL, 0.40 mmol), anhydrous toluene (0.60 mL) and DMPU (0.20 mL). The reaction mixture was stirred for 24 h at rt. The crude material was purified by flash column chromatography (0–1% EtOAc in PE) to provide the title compound as a colorless liquid in 58% yield (36.2 mg) with >99:1 rr.

**Rf** 0.2 (2% EtOAc in PE), UV;

**<sup>1</sup>H NMR** (500 MHz, CDCl<sub>3</sub>) δ 7.31 (t, *J* = 7.5 Hz, 2H), 7.26 (d, *J* = 6.7 Hz, 2H), 7.23 – 7.16 (m, 3H), 6.87 (d, *J* = 8.7 Hz, 2H), 3.88 (t, *J* = 7.8 Hz, 1H), 3.81 (s, 3H), 2.09 – 2.01 (m, 2H), 1.38 – 1.25 (m, 12H), 0.92 (t, *J* = 7.0 Hz, 3H);

**<sup>13</sup>C NMR** (126 MHz, CDCl<sub>3</sub>) δ 157.8, 145.8, 137.6, 128.8, 128.4, 127.8, 125.9, 113.7, 55.2, 50.5, 35.9, 31.9, 29.7, 29.5, 29.4, 28.1, 22.7, 14.2;

**HRMS** (ESI) calcd. for C<sub>22</sub>H<sub>30</sub>NaO [M+Na]<sup>+</sup> *m/z* 333.2189, found 333.2191;

**IR** (neat, cm<sup>-1</sup>) 2923, 1509, 1245, 1038, 697;

[α]<sub>D</sub><sup>20</sup> = -4.4 (*c* = 0.7, CHCl<sub>3</sub>); 95% *ee*;

**HPLC analysis** CHIRALCEL OJ-H column, 1% EtOH in hexane, 0.5 mL/min, 220 nm UV detector,  $t_R$  (minor) = 28.0 min,  $t_R$  (major) = 30.1 min.

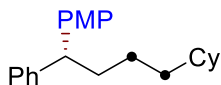

**(R)-1-(4-Cyclohexyl-1-phenylbutyl)-4-methoxybenzene** (Figure 4, **4w**). From **(4-Cyclohexylbut-3-en-1-yl)benzene** (42.8 mg, 0.20 mmol), the title compound was prepared following the general procedure **A** using  $\text{NiCl}_2 \cdot \text{glyme}$  (2.2 mg, 5.0 mol%), **L\*** (7.2 mg, 6.0 mol%), **L** [0.42 mg, 0.2 mL (2.1 mg/mL in toluene)], KF (23.2 mg, 2.0 equiv), 4-iodoanisole (94.0 mg, 0.40 mmol, 2.0 equiv), DMMS (49.3  $\mu\text{L}$ , 0.40 mmol), anhydrous toluene (0.60 mL) and DMPU (0.20 mL). The reaction mixture was stirred for 24 h at rt. The crude material was purified by flash column chromatography (0–1% EtOAc in PE) to provide the title compound as a white solid in 61% yield (39.5 mg) with >99:1 rr.

**Rf** 0.2 (2% EtOAc in PE), UV;

**$^1\text{H NMR}$**  (500 MHz,  $\text{CDCl}_3$ )  $\delta$  7.35 – 7.25 (m, 4H), 7.20 (d,  $J = 8.4$  Hz, 3H), 6.87 (d,  $J = 8.4$  Hz, 2H), 3.89 (t,  $J = 7.8$  Hz, 1H), 3.81 (s, 3H), 2.06 – 1.99 (m, 2H), 1.72 – 1.64 (m, 5H), 1.32 – 1.17 (m, 8H), 0.90 – 0.81 (m, 2H);

**$^{13}\text{C NMR}$**  (126 MHz,  $\text{CDCl}_3$ )  $\delta$  157.8, 145.8, 137.6, 128.8, 128.4, 127.8, 125.9, 113.8, 113.7, 55.2, 50.6, 37.6, 37.5, 36.2, 33.5, 26.8, 26.5, 25.3;

**HRMS** (ESI) calcd. for  $\text{C}_{23}\text{H}_{31}\text{O}$  [ $\text{M}+\text{H}$ ] $^+$   $m/z$  323.2369, found 323.2365;

**IR** (neat,  $\text{cm}^{-1}$ ) 2920, 1509, 1246, 1037, 697;

**m.p.** 59.1 – 60.0  $^\circ\text{C}$ ;

**$[\alpha]_D^{20}$**  = –3.8 ( $c = 1.7$ ,  $\text{CHCl}_3$ ); 96% *ee*;

**HPLC analysis** CHIRALCEL OJ-H\*2 column, 1% EtOH in hexane, 0.5 mL/min, 220 nm UV detector,  $t_R$  (minor) = 30.5 min,  $t_R$  (major) = 32.3 min.

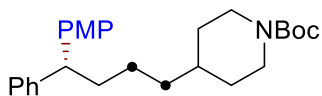

**tert-Butyl (R)-4-(4-(4-methoxyphenyl)-4-phenylbutyl)piperidine-1-carboxylate** (Figure 4, **4x**). From **tert-Butyl 4-(4-phenylbut-1-en-1-yl)piperidine-1-carboxylate**

(63.0 mg, 0.20 mmol), the title compound was prepared following the general procedure **A** using NiCl<sub>2</sub>·glyme (2.2 mg, 5.0 mol%), **L**\* (7.2 mg, 6.0 mol%), **L** [0.42 mg, 0.2 mL (2.1 mg/mL in toluene)], KF (23.2 mg, 2.0 equiv), 4-iodoanisole (94.0 mg, 0.40 mmol, 2.0 equiv), DMMS (49.3 μL, 0.40 mmol), anhydrous toluene (0.60 mL) and DMPU (0.20 mL). The reaction mixture was stirred for 24 h at rt. The crude material was purified by flash column chromatography (0–2% EtOAc in PE) to provide the title compound as a white solid in 75% yield (63.9 mg) with >99:1 rr.

**Rf** 0.3 (4% EtOAc in PE), UV;

<sup>1</sup>H NMR (500 MHz, CDCl<sub>3</sub>) δ 7.29 (t, *J* = 7.5 Hz, 2H), 7.24 (d, *J* = 6.7 Hz, 2H), 7.18 (dd, *J* = 10.9, 7.9 Hz, 3H), 6.85 (d, *J* = 8.7 Hz, 2H), 4.06 (s, 2H), 3.86 (t, *J* = 7.8 Hz, 1H), 3.79 (s, 3H), 2.73 – 2.55 (m, 2H), 2.06 – 1.97 (m, 2H), 1.63 – 1.57 (m, 2H), 1.47 (s, 9H), 1.37 – 1.27 (m, 5H), 1.10 – 0.98 (m, 2H);

<sup>13</sup>C NMR (126 MHz, CDCl<sub>3</sub>) δ 157.8, 154.9, 145.6, 137.3, 128.7, 128.4, 127.7, 125.9, 113.8, 79.2, 55.2, 50.5, 44.4, 43.7, 36.5, 36.0, 35.8, 28.5, 25.1;

**HRMS** (ESI) calcd. for C<sub>27</sub>H<sub>37</sub>NNaO<sub>3</sub> [M+Na]<sup>+</sup> *m/z* 446.2666, found 446.2666;

**IR** (neat, cm<sup>-1</sup>) 3674, 2987, 1681, 1408, 1066;

**m.p.** 75.1 – 78.6 °C;

[α]<sub>D</sub><sup>20</sup> = –1.7 (*c* = 2.5, CHCl<sub>3</sub>); 96% *ee*;

**HPLC analysis** CHIRALCEL IC column, 5% <sup>i</sup>PrOH in hexane, 0.8 mL/min, 220 nm UV detector, *t*<sub>R</sub> (minor) = 20.8 min, *t*<sub>R</sub> (major) = 22.4 min.

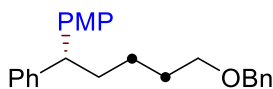

**(R)-1-(5-(Benzyloxy)-1-phenylpentyl)-4-methoxybenzene** (Figure 4, **4y**). From **(E)-(5-(Benzyloxy)pent-3-en-1-yl)benzene** (50.4 mg, 0.20 mmol), the title compound was prepared following the general procedure **A** using NiCl<sub>2</sub>·glyme (2.2 mg, 5.0 mol%), **L**\* (7.2 mg, 6.0 mol%), **L** [0.42 mg, 0.2 mL (2.1 mg/mL in toluene)], KF (23.2 mg, 2.0 equiv), 4-iodoanisole (94.0 mg, 0.40 mmol, 2.0 equiv), DMMS (49.3 μL, 0.40 mmol), anhydrous toluene (0.60 mL) and DMPU (0.20 mL). The reaction mixture was stirred for 24 h at rt. The crude material was purified by flash column chromatography (0–2%



EtOAc in PE) to provide the title compound as a colorless liquid in 37% yield (26.6 mg) with >99:1 rr.

**Rf** 0.4 (5% EtOAc in PE), UV;

**<sup>1</sup>H NMR** (500 MHz, CDCl<sub>3</sub>) δ 7.39 – 7.32 (m, 5H), 7.29 (d, *J* = 8.0 Hz, 2H), 7.25 (d, *J* = 7.0 Hz, 2H), 7.19 (dd, *J* = 11.0, 7.9 Hz, 3H), 6.85 (d, *J* = 8.7 Hz, 2H), 4.50 (s, 2H), 3.88 (t, *J* = 7.8 Hz, 1H), 3.80 (s, 3H), 3.47 (t, *J* = 6.6 Hz, 2H), 2.11 – 2.02 (m, 2H), 1.74 – 1.64 (m, 2H), 1.43 – 1.33 (m, 2H);

**<sup>13</sup>C NMR** (126 MHz, CDCl<sub>3</sub>) δ 157.8, 145.6, 138.6, 137.3, 128.8, 128.4, 128.4, 127.8, 127.7, 127.5, 125.9, 113.8, 72.9, 70.3, 55.2, 50.5, 35.7, 29.7, 24.7;

**HRMS** (ESI) calcd. for C<sub>25</sub>H<sub>29</sub>O<sub>2</sub> [M+H]<sup>+</sup> *m/z* 361.2162, found 361.2160;

**IR** (neat, cm<sup>-1</sup>) 2931, 1509, 1245, 1036, 696;

[α]<sub>D</sub><sup>20</sup> = -12.3 (*c* = 0.7, CHCl<sub>3</sub>); 93% *ee*;

**HPLC analysis** CHIRALCEL IG\*2 column, 1% *i*PrOH in hexane, 0.5 mL/min, 220 nm UV detector, *t*<sub>R</sub> (minor) = 42.2 min, *t*<sub>R</sub> (major) = 43.8 min.

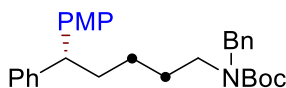

***tert*-Butyl (*R*)-benzyl(5-(4-methoxyphenyl)-5-phenylpentyl)carbamate** (Figure 4, **4z**).

From ***tert*-Butyl (*E*)-benzyl(5-phenylpent-2-en-1-yl)carbamate** (70.2 mg, 0.20 mmol), the title compound was prepared following the general procedure **A** using NiCl<sub>2</sub>·glyme (2.2 mg, 5.0 mol%), **L\*** (7.2 mg, 6.0 mol%), **L** [0.42 mg, 0.2 mL (2.1 mg/mL in toluene)], KF (23.2 mg, 2.0 equiv), 4-iodoanisole (94.0 mg, 0.40 mmol, 2.0 equiv), DMMS (49.3 μL, 0.40 mmol), anhydrous toluene (0.60 mL) and DMPU (0.20 mL). The reaction mixture was stirred for 24 h at rt. The crude material was purified by flash column chromatography (0–5% EtOAc in PE) to provide the title compound as a colorless liquid in 51% yield (47.3 mg) with >99:1 rr.

**Rf** 0.2 (5% EtOAc in PE), UV;

**<sup>1</sup>H NMR** (500 MHz, CDCl<sub>3</sub>) δ 7.35 (t, *J* = 7.3 Hz, 2H), 7.32 – 7.27 (m, 3H), 7.25 – 7.22 (m, 3H), 7.20 (d, *J* = 7.3 Hz, 1H), 7.17 (d, *J* = 8.6 Hz, 2H), 6.86 (d, *J* = 8.5 Hz, 2H), 4.43 (d, *J* = 25.0 Hz, 2H), 3.84 (t, *J* = 7.8 Hz, 1H), 3.80 (d, *J* = 1.6 Hz, 3H), 3.17 (d, *J* = 45.9 Hz, 2H), 2.07 – 1.99 (m, 2H), 1.63 – 1.39 (m, 12H), 1.24 (s, 2H);

<sup>13</sup>C NMR (126 MHz, CDCl<sub>3</sub>) δ 157.9, 156.1, 155.6, 145.5, 138.8, 137.2, 128.7, 128.5, 128.4, 127.7, 127.1, 126.0, 113.8, 79.6, 55.2, 50.5, 49.8, 46.7&46.4 (*due to rotamer*), 35.6, 28.5, 28.2&27.9 (*due to rotamer*), 25.4;

HRMS (ESI) calcd. for C<sub>30</sub>H<sub>37</sub>NNaO<sub>3</sub> [M+Na]<sup>+</sup> *m/z* 482.2666, found 482.2668;

IR (neat, cm<sup>-1</sup>) 2972, 1687, 1510, 1244, 698;

[α]<sub>D</sub><sup>20</sup> = -2.9 (*c* = 2.3, CHCl<sub>3</sub>); 93% *ee*;

HPLC analysis CHIRALCEL OD-H column, 10% *i*PrOH in hexane, 0.8 mL/min, 220 nm UV detector, *t*<sub>R</sub> (minor) = 7.7 min, *t*<sub>R</sub> (major) = 8.5 min.

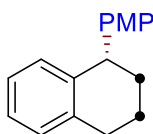

(*S*)-1-(4-Methoxyphenyl)-1,2,3,4-tetrahydronaphthalene (Figure 4, **4a'**)<sup>1</sup>. From **1,4-Dihydronaphthalene** (26.0 mg, 0.20 mmol), the title compound was prepared following the general procedure A using NiCl<sub>2</sub>·glyme (2.2 mg, 5.0 mol%), **L\*** (7.2 mg, 6.0 mol%), **L** [0.42 mg, 0.2 mL (2.1 mg/mL in toluene)], KF (23.2 mg, 2.0 equiv), 4-iodoanisole (94.0 mg, 0.40 mmol, 2.0 equiv), DMMS (49.3 μL, 0.40 mmol), anhydrous toluene (0.60 mL) and DMPU (0.20 mL). The reaction mixture was stirred for 24 h at rt. The crude material was purified by flash column chromatography (0–1% EtOAc in PE) to provide the title compound as a colorless liquid in 62% yield (29.7 mg) with >99:1 *rr*.

*R*<sub>f</sub> 0.2 (2% EtOAc in PE), UV;

<sup>1</sup>H NMR (500 MHz, CDCl<sub>3</sub>) δ 7.16 (d, *J* = 6.7 Hz, 2H), 7.06 (d, *J* = 8.7 Hz, 3H), 6.88 (dd, *J* = 11.8, 8.4 Hz, 3H), 4.11 (t, *J* = 6.7 Hz, 1H), 3.83 (s, 3H), 3.00 – 2.83 (m, 2H), 2.22 – 2.13 (m, 1H), 1.96 – 1.85 (m, 2H), 1.83 – 1.75 (m, 1H);

<sup>13</sup>C NMR (126 MHz, CDCl<sub>3</sub>) δ 157.8, 139.8, 139.7, 137.6, 130.2, 129.7, 128.9, 125.8, 125.6, 113.6, 55.3, 44.8, 33.4, 29.8, 21.0;

HRMS (ESI) calcd. for C<sub>17</sub>H<sub>18</sub>NaO [M+Na]<sup>+</sup> *m/z* 261.1250, found 261.1252;

IR (neat, cm<sup>-1</sup>) 3674, 2987, 1510, 1243, 1066, 740;

[α]<sub>D</sub><sup>20</sup> = +23.8 (*c* = 0.5, CHCl<sub>3</sub>); 90% *ee*;

HPLC analysis CHIRALCEL OJ-H column, 1% EtOH in hexane, 0.5 mL/min, 220 nm UV detector, *t*<sub>R</sub> (major) = 23.5 min, *t*<sub>R</sub> (minor) = 27.1 min.

## 2.2. Suboptimal Substrate

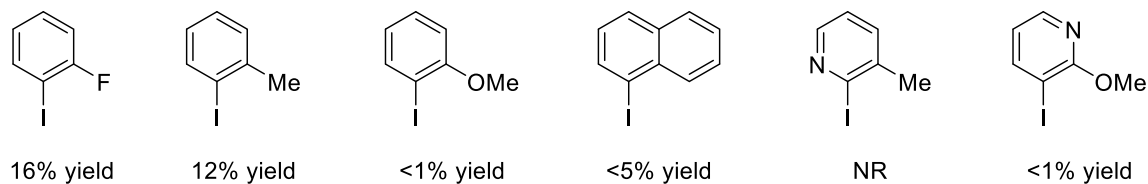

## 2.3. Crystal Data and Structure Refinement for **4t**

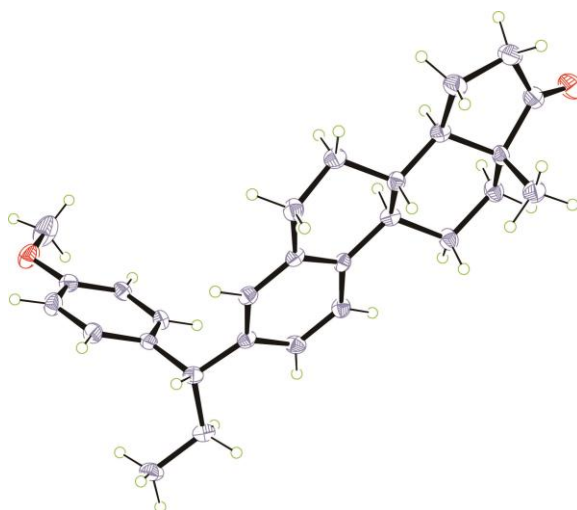

**Supplementary Fig. 1.** Crystal data and structure refinement for **4t**

|                     |                                                |
|---------------------|------------------------------------------------|
| Identification code | <b>4t_a</b>                                    |
| Empirical formula   | C <sub>28</sub> H <sub>34</sub> O <sub>2</sub> |
| Formula weight      | 402.55                                         |
| Temperature/K       | 193                                            |
| Crystal system      | monoclinic                                     |
| Space group         | P21                                            |
| a/Å                 | 6.8064(14)                                     |
| b/Å                 | 7.3932(12)                                     |
| c/Å                 | 22.709(5)                                      |
| $\alpha$ /°         | 90                                             |
| $\beta$ /°          | 98.375(8)                                      |

$\gamma/^\circ$  90  
 Volume/ $\text{\AA}^3$  1130.6(4)  
 Z 2  
 $\rho_{\text{calc}}/\text{cm}^3$  1.183  
 $\mu/\text{mm}^{-1}$  0.072  
 F(000) 436.0  
 Crystal size/ $\text{mm}^3$   $0.18 \times 0.14 \times 0.12$   
 Radiation MoK $\alpha$  ( $\lambda = 0.71073$ )  
 $2\theta$  range for data collection/ $^\circ$  5.802 to 53.82  
 Index ranges  $-8 \leq h \leq 8, -9 \leq k \leq 9, -23 \leq l \leq 28$   
 Reflections collected 9271  
 Independent reflections 4542 [Rint = 0.0492, Rsigma = 0.0682]  
 Data/restraints/parameters 4542/1/274  
 Goodness-of-fit on F2 1.072  
 Final R indexes [ $I \geq 2\sigma(I)$ ] R1 = 0.0584, wR2 = 0.1245  
 Final R indexes [all data] R1 = 0.0809, wR2 = 0.1480  
 Largest diff. peak/hole / e  $\text{\AA}^{-3}$  0.26/-0.30  
 Flack parameter -0.3(10)

## 2.4. GC Trace and GC-MS Analysis of 3a

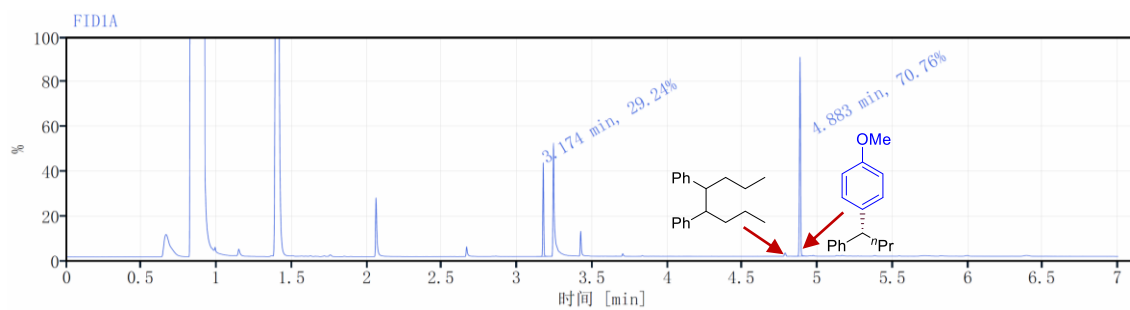

| RetTime (min) | Signal | Width(min) | Area | Height | Area% |
|---------------|--------|------------|------|--------|-------|
| 3.174         | FID1A  | 0.083      | 11.0 | 25.7   | 29.24 |
| 4.883         | FID1A  | 0.093      | 26.6 | 54.9   | 70.76 |
| Total FID1A   |        |            | 37.6 |        |       |

**Supplementary Fig. 2. GC Trace of 3a**

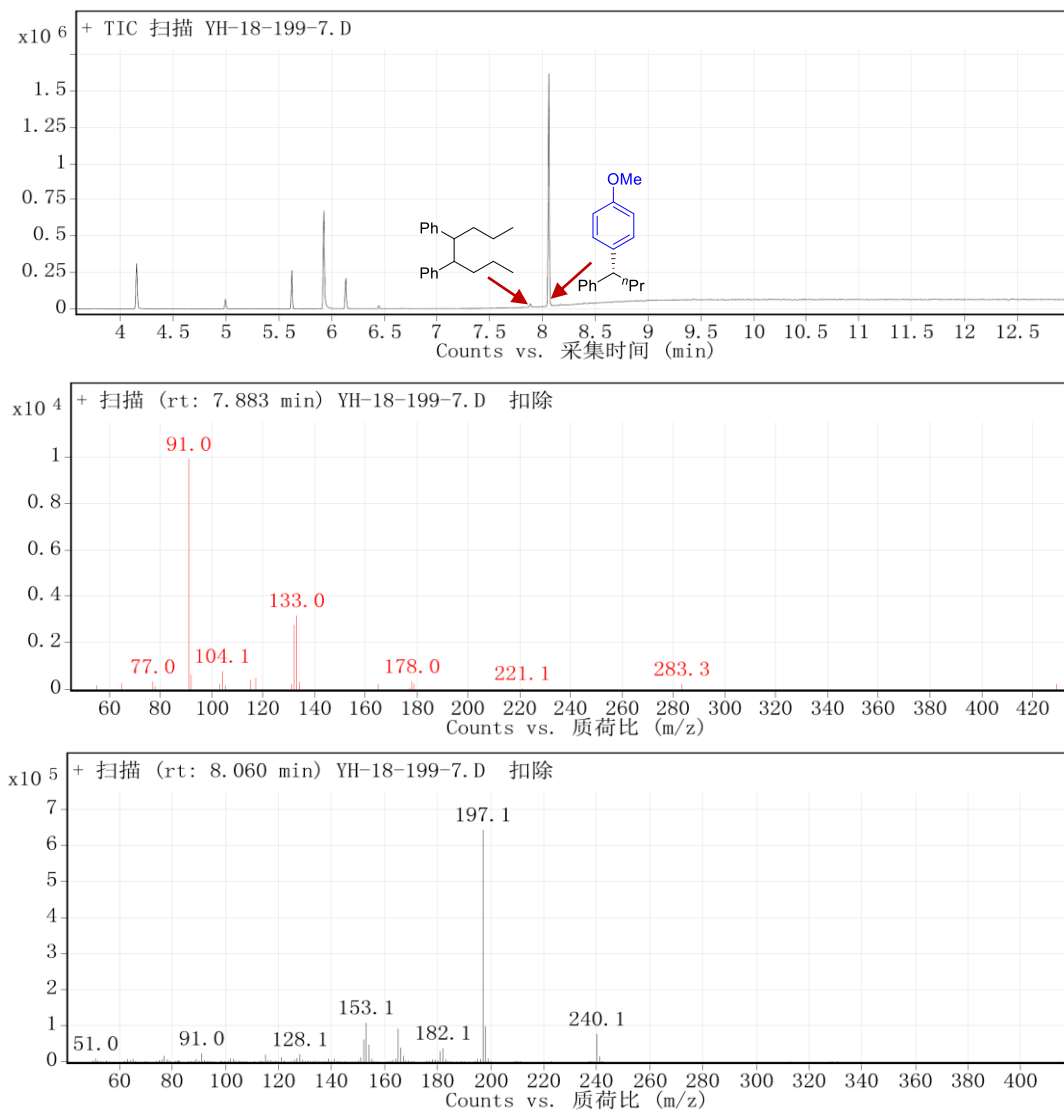

**Supplementary Fig. 3. GC-MS Analysis of 3a**

## 2.5. Detailed Condition Optimization

**Supplementary Table 1.** Nickel salts screening for enantioselective C(sp<sup>3</sup>)-H arylation

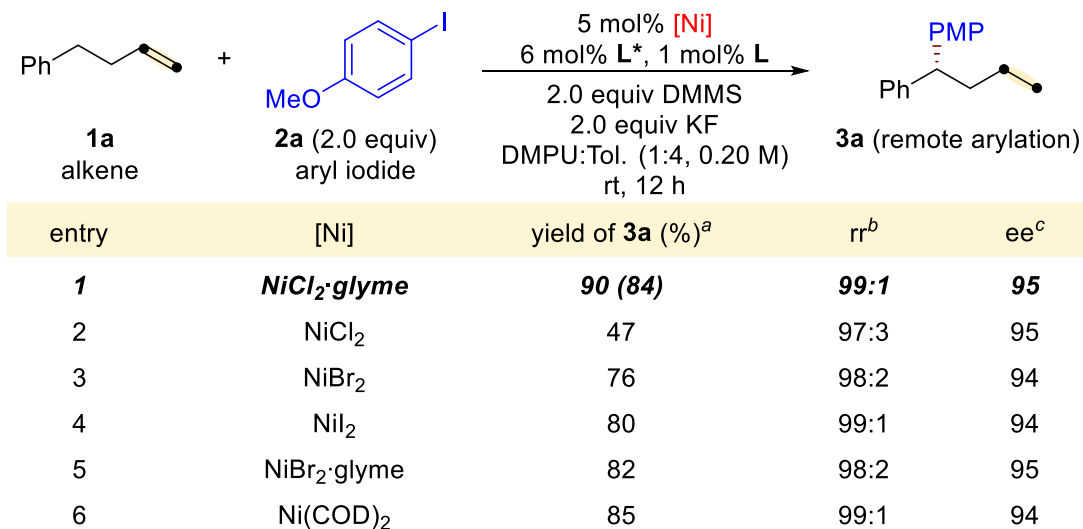

**Supplementary Table 2.** Chiral ligand screening for enantioselective C(sp<sup>3</sup>)-H arylation

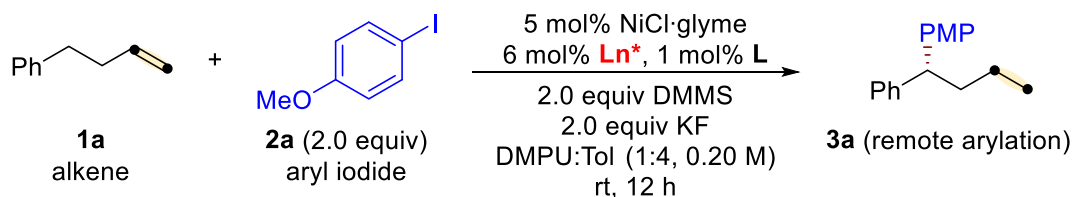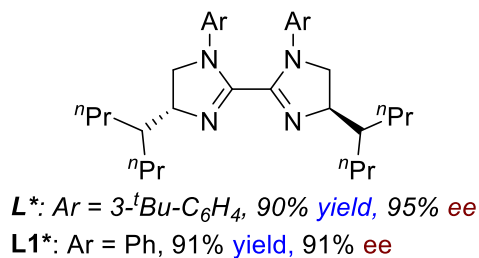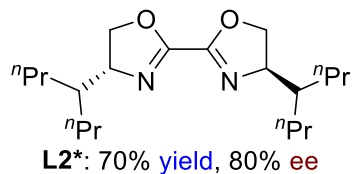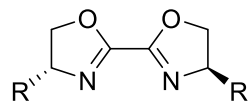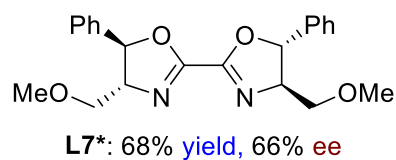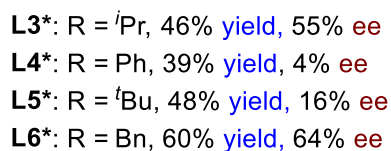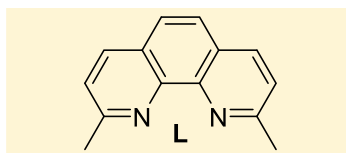

**Supplementary Table 3.** Base screening for enantioselective C(sp<sup>3</sup>)-H arylation

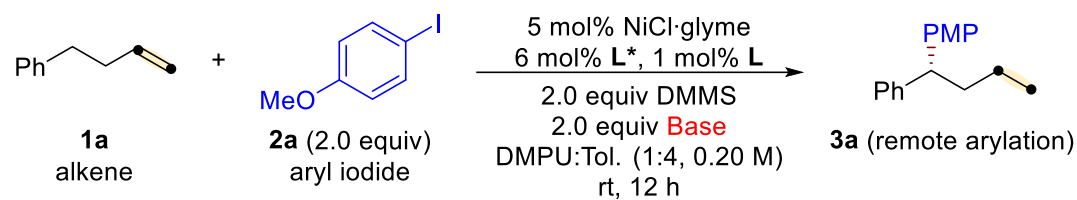

| entry    | Base                                             | yield of <b>3a</b> (%) <sup>a</sup> | rr <sup>b</sup> | ee <sup>c</sup> |
|----------|--------------------------------------------------|-------------------------------------|-----------------|-----------------|
| <b>1</b> | <b>KF</b>                                        | <b>90 (84)</b>                      | <b>99:1</b>     | <b>95</b>       |
| 2        | CsF                                              | 42                                  | 95:5            | 91              |
| 3        | NaF                                              | trace                               | -               | -               |
| 4        | K <sub>3</sub> PO <sub>4</sub>                   | 19                                  | 89:11           | -               |
| 5        | K <sub>3</sub> PO <sub>4</sub> ·H <sub>2</sub> O | 79                                  | 99:1            | 93              |
| 6        | LiOMe                                            | 24                                  | 85:15           | -               |

**Supplementary Table 4.** Solvent screening for enantioselective C(sp<sup>3</sup>)-H arylation

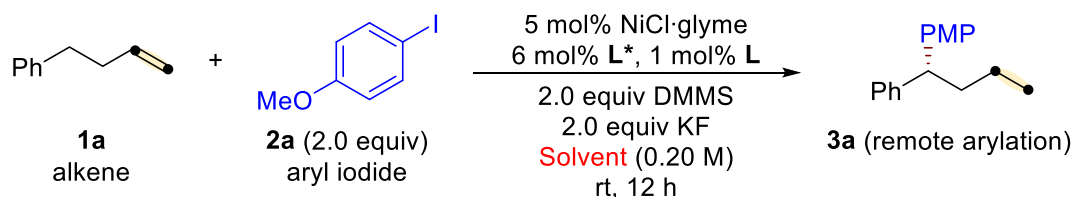

| entry    | Solvent               | yield of <b>3a</b> (%) <sup>a</sup> | rr <sup>b</sup> | ee <sup>c</sup> |
|----------|-----------------------|-------------------------------------|-----------------|-----------------|
| <b>1</b> | <b>DMPU:Tol (1:4)</b> | <b>90 (84)</b>                      | <b>99:1</b>     | <b>95</b>       |
| 2        | DMPU:Tol (1:1)        | 80                                  | 95:5            | 95              |
| 3        | DMPU:Tol (1:9)        | 61                                  | 99:1            | 96              |
| 4        | DMPU                  | 44                                  | 94:6            | 93              |
| 5        | Tol                   | 3                                   | -               | -               |
| 6        | DMAc                  | 53                                  | 96:4            | 82              |

**Supplementary Table 5.** Silane screening for enantioselective C(sp<sup>3</sup>)-H arylation

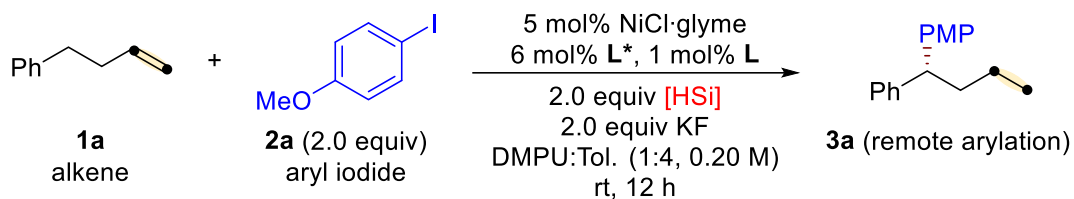

| entry    | [HSi]                         | yield of <b>3a</b> (%) <sup>a</sup> | rr <sup>b</sup> | ee <sup>c</sup> |
|----------|-------------------------------|-------------------------------------|-----------------|-----------------|
| <b>1</b> | <b>(MeO)<sub>2</sub>MeSiH</b> | <b>90 (84)</b>                      | <b>99:1</b>     | <b>95</b>       |
| 2        | (EtO) <sub>2</sub> MeSiH      | 93                                  | 95:5            | 95              |
| 3        | (EtO) <sub>3</sub> SiH        | 64                                  | 97:3            | 95              |
| 4        | (MeO) <sub>3</sub> SiH        | 72                                  | 97:3            | 95              |
| 5        | PMHS                          | 70                                  | 98:2            | 95              |

**Supplementary Table 6.** ligand ratio screening for enantioselective C(sp<sup>3</sup>)-H arylation

**1a** alkene + **2a** (2.0 equiv) aryl iodide  $\xrightarrow[2.0 \text{ equiv KF, DMPU:Tol. (1:4, 0.20 M), rt, 12 h}]{5 \text{ mol\% NiCl}_2\cdot\text{glyme, 6 mol\% L}^*, x \text{ mol\% L, 2.0 equiv DMMS}}$  **3a** (remote arylation)

|   | L (x mol%) | yield (%) <sup>a</sup> | ee (%) <sup>b</sup> | rr <sup>c</sup> |
|---|------------|------------------------|---------------------|-----------------|
|   | 0          | 52 <sup>d</sup>        | 95                  | 68:32           |
|   | 0.5        | 84                     | 95                  | 97:3            |
|   | <b>1</b>   | <b>90</b>              | <b>95</b>           | <b>99:1</b>     |
|   | 2          | 90                     | 93                  | 99:1            |
|   | 3          | 88                     | 85                  | 99:1            |
|   | 4          | 85                     | 68                  | 99:1            |
|   | 5          | 77                     | 54                  | 99:1            |
| 6 | 60         | 50                     | 99:1                |                 |

a. Yields were determined by gas chromatography (GC) analysis using *n*-dodecane as the internal standard, the yield within parentheses is the isolated yield and is an average of two runs (0.20 mmol scale). b. Enantioselectivities were determined by chiral HPLC analysis. c. Regioselectivities (rr) were determined by GC and GC-MS analysis. d.



Without **L**: the other regioisomers were 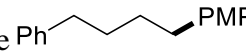 (24% yield) and  (1% yield), the byproducts were  (19% yield) and  (2% yield).

## 2.6. Regioconvergent Experiment

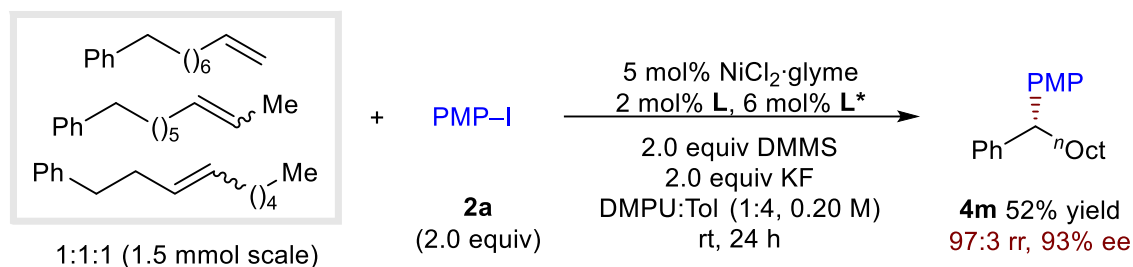

**(R)**-1-methoxy-4-(1-phenylnonyl)benzene (Figure 5, **4m**). From **Non-8-en-1-ylbenzene** (101.2 mg, 0.50 mmol), **Non-7-en-1-ylbenzene** (101.2 mg, 0.50 mmol) and **Non-3-en-1-ylbenzene** (101.2 mg, 0.50 mmol), the title compound was prepared following the general procedure **A** using NiCl<sub>2</sub>·glyme (16.5 mg, 5.0 mol%), **L**\* (57.0 mg, 6.0 mol%), **L** (6.2 mg, 5.0 mol%), KF (174.0 mg, 2.0 equiv), 4-iodoanisole (705.0 mg, 3.0 mmol, 2.0 equiv), DMMS (370.0 μL, 3.0 mmol), anhydrous toluene (6.0 mL) and DMPU (1.5 mL). The reaction mixture was stirred for 24 h at rt. The crude material was purified by flash column chromatography (0–1% EtOAc in PE) to provide the title compound as a colorless liquid in 52% yield (242.7 mg) with 97:3 rr and 93% *ee*.

## 2.7. Application of Multiligand-Relay Catalysis in 1,3-Arylboration Reaction

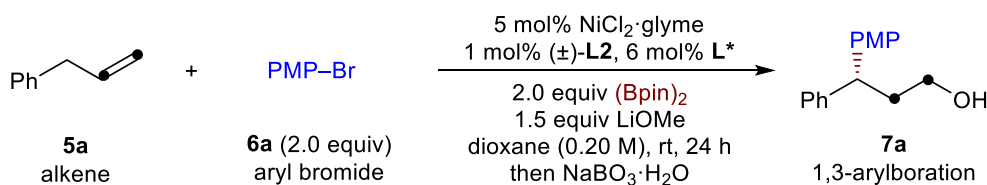

**General procedure (B) for the regio- and enantioselective 1,3-arylboration reaction.**

In a nitrogen-filled glove box, to an oven-dried 8 mL screw-cap vial equipped with a magnetic stir bar was added NiCl<sub>2</sub>·glyme (2.2 mg, 5.0 mol%), **L**\* (7.2 mg, 6.0 mol%), (±)-**L2** (0.50 mg, 1.0 mol%), LiOMe (11.4 mg, 1.5 equiv), and anhydrous dioxane (1.0 mL) were added, and the mixture was stirred for 15 min at room temperature, at which time allylbenzene (26.5 μL, 0.20 mmol), 4-bromoanisole (50.0 μL, 0.40 mmol) and (Bpin)<sub>2</sub> (101.6 mg, 0.40 mmol) were added to the resulting mixture in this order. The tube was sealed with a teflon-lined screw cap, removed from the glove box and the reaction was stirred at rt (22~26 °C) for up to 24 h (the mixture was stirred at 750 rpm, ensuring that the base was uniformly suspended). After the reaction was complete, the reaction mixture was directly filtered through a short pad of silica gel [EtOAc in Petroleum ether (PE)] to give the crude product. Dodecane (20 μL) was added as an internal standard for GC analysis. The crude product was then oxidized to the corresponding alcohol with NaBO<sub>3</sub>·H<sub>2</sub>O and purified by chromatography on silica gel for each substrate. The yields reported are the average of at least two experiments, unless otherwise indicated. The enantiomeric excesses (% *ee*) were determined by HPLC analysis using chiral stationary phases.

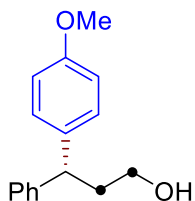

**(R)-3-(4-Methoxyphenyl)-3-phenylpropan-1-ol** (Figure 5, **7a**). From **4-Bromoanisole** (50.0 μL, 0.40 mmol), the title compound was prepared following the general procedure **B** using NiCl<sub>2</sub>·glyme (2.2 mg, 5.0 mol%), **L**\* (7.2 mg, 6.0 mol%), (±)-**L2** (0.50 mg, 1.0 mol%), LiOMe (11.4 mg, 1.5 equiv), allylbenzene (26.5 μL, 0.20 mmol), (Bpin)<sub>2</sub> (101.6 mg, 0.40 mmol) and anhydrous dioxane (1.0 mL). The reaction mixture was stirred for 24 h at rt. The crude material was purified by flash column chromatography (0–10% EtOAc in PE) to provide the title compound as a colorless liquid in 61% yield (29.5 mg) with 95:5 *rr*.

**Rf** 0.3 (10% EtOAc in PE), UV;

**<sup>1</sup>H NMR** (500 MHz, CDCl<sub>3</sub>) δ 7.34 – 7.25 (m, 4H), 7.25 – 7.17 (m, 3H), 6.86 (d, *J* = 8.7 Hz, 2H), 4.12 (t, *J* = 7.9 Hz, 1H), 3.80 (s, 3H), 3.63 (t, *J* = 6.4 Hz, 2H), 2.37 – 2.28 (m, 2H);

**<sup>13</sup>C NMR** (126 MHz, CDCl<sub>3</sub>) δ 158.0, 144.9, 136.6, 128.8, 128.6, 127.8, 126.2, 113.9, 61.2, 55.3, 46.5, 38.4;

**HRMS** (ESI) calcd. for C<sub>16</sub>H<sub>19</sub>O<sub>2</sub> [M+H]<sup>+</sup> *m/z* 243.1380, found 243.1378;

**IR** (neat, cm<sup>-1</sup>) 3348(br), 2969, 1583, 1245, 1028, 698;

[α]<sub>D</sub><sup>20</sup> = -6.8 (*c* = 1.0, CHCl<sub>3</sub>); 95% *ee*;

**HPLC analysis** CHIRALCEL AD-H column, 5% <sup>i</sup>PrOH in hexane, 0.8 mL/min, 220 nm UV detector, *t*<sub>R</sub> (major) = 38.4 min, *t*<sub>R</sub> (minor) = 42.8 min.

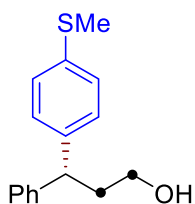

**(R)-3-(4-(Methylthio)phenyl)-3-phenylpropan-1-ol** (Figure 5, 7b). From **(4-Bromophenyl)(methyl)sulfane** (81.2 mg, 0.40 mmol), the title compound was prepared following the general procedure **B** using NiCl<sub>2</sub>·glyme (2.2 mg, 5.0 mol%), **L\*** (7.2 mg, 6.0 mol%), (±)-**L2** (0.50 mg, 1.0 mol%), LiOMe (11.4 mg, 1.5 equiv), allylbenzene (26.5 μL, 0.20 mmol), (Bpin)<sub>2</sub> (101.6 mg, 0.40 mmol) and anhydrous dioxane (1.0 mL). The reaction mixture was stirred for 24 h at rt. The crude material was purified by flash column chromatography (0–10% EtOAc in PE) to provide the title compound as a colorless liquid in 50% yield (25.9 mg) with 96:4 rr.

**R<sub>f</sub>** 0.3 (10% EtOAc in PE), UV;

**<sup>1</sup>H NMR** (500 MHz, CDCl<sub>3</sub>) δ 7.33 – 7.29 (m, 2H), 7.28 – 7.25 (m, 2H), 7.24 – 7.18 (m, 5H), 4.13 (t, *J* = 7.9 Hz, 1H), 3.63 (t, *J* = 6.4 Hz, 2H), 2.47 (s, 3H), 2.32 (q, *J* = 7.5 Hz, 2H);

**<sup>13</sup>C NMR** (126 MHz, CDCl<sub>3</sub>) δ 144.4, 141.6, 136.0, 128.6, 128.4, 127.8, 127.1, 126.4, 61.0, 46.8, 38.1, 16.1;

**HRMS** (ESI) calcd. for C<sub>16</sub>H<sub>18</sub>NaOS [M+Na]<sup>+</sup> *m/z* 281.0971, found 281.0973;

**IR** (neat, cm<sup>-1</sup>) 3344(br), 2920, 1491, 1049, 698;

$[\alpha]_D^{20} = -5.4$  ( $c = 1.0$ ,  $\text{CHCl}_3$ ); 96% *ee*;

**HPLC analysis** CHIRALCEL AD-H column, 5% *i*PrOH in hexane, 1.0 mL/min, 220 nm UV detector,  $t_R$  (minor) = 23.8 min,  $t_R$  (major) = 26.3 min.

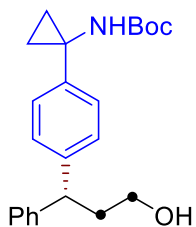

**tert-Butyl (R)-(1-(4-(3-hydroxy-1-phenylpropyl)phenyl)cyclopropyl)carbamate**

(Figure 5, 7c). From **tert-Butyl (1-(4-bromophenyl)cyclopropyl)carbamate** (124.9 mg, 0.40 mmol), the title compound was prepared following the general procedure **B** using  $\text{NiCl}_2 \cdot \text{glyme}$  (2.2 mg, 5.0 mol%), **L\*** (7.2 mg, 6.0 mol%), ( $\pm$ )-**L2** (0.50 mg, 1.0 mol%),  $\text{LiOMe}$  (11.4 mg, 1.5 equiv), allylbenzene (26.5  $\mu\text{L}$ , 0.20 mmol),  $(\text{Bpin})_2$  (101.6 mg, 0.40 mmol) and anhydrous dioxane (1.0 mL). The reaction mixture was stirred for 24 h at rt. The crude material was purified by flash column chromatography (0–10% EtOAc in PE) to provide the title compound as a colorless liquid in 41% yield (30.1 mg) with 95:5 rr.

**Rf** 0.4 (15% EtOAc in PE), UV;

**$^1\text{H}$  NMR** (500 MHz,  $\text{CD}_3\text{OD}$ )  $\delta$  7.29 – 7.24 (m, 4H), 7.21 (d,  $J = 7.7$  Hz, 2H), 7.18 – 7.08 (m, 3H), 4.10 (t,  $J = 7.9$  Hz, 1H), 3.49 (t,  $J = 6.6$  Hz, 2H), 2.27 (q,  $J = 7.0$  Hz, 2H), 1.45 (s, 9H), 1.21 – 1.12 (m, 4H);

**$^{13}\text{C}$  NMR** (126 MHz,  $\text{CD}_3\text{OD}$ )  $\delta$  157.1, 144.9, 142.3, 141.5, 128.0, 127.5, 127.4, 125.7, 124.4, 78.8, 59.7, 46.6, 37.9, 33.9, 27.4, 17.6;

**HRMS** (ESI) calcd. for  $\text{C}_{23}\text{H}_{29}\text{NNaO}_3$   $[\text{M}+\text{Na}]^+$   $m/z$  390.2040, found 390.2039;

**IR** (neat,  $\text{cm}^{-1}$ ) 3348(br), 2973, 1690, 1392, 1066, 699;

$[\alpha]_D^{20} = -7.2$  ( $c = 1.0$ ,  $\text{CHCl}_3$ ); 94% *ee*;

**HPLC analysis** CHIRALCEL OD-H column, 25% *i*PrOH in hexane, 1.0 mL/min, 220 nm UV detector,  $t_R$  (major) = 15.3 min,  $t_R$  (minor) = 26.9 min.

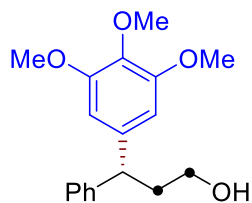

**(R)-3-Phenyl-3-(3,4,5-trimethoxyphenyl)propan-1-ol** (Figure 5, **7d**). From **5-Bromo-1,2,3-trimethoxybenzene** (98.8 mg, 0.40 mmol), the title compound was prepared following the general procedure **B** using NiCl<sub>2</sub>·glyme (2.2 mg, 5.0 mol%), **L\*** (7.2 mg, 6.0 mol%), (±)-**L2** (0.50 mg, 1.0 mol%), LiOMe (11.4 mg, 1.5 equiv), allylbenzene (26.5 μL, 0.20 mmol), (Bpin)<sub>2</sub> (101.6 mg, 0.40 mmol) and anhydrous dioxane (1.0 mL). The reaction mixture was stirred for 24 h at rt. The crude material was purified by flash column chromatography (0–20% EtOAc in PE) to provide the title compound as a colorless liquid in 55% yield (33.4 mg) with 92:8 rr.

**Rf** 0.2 (20% EtOAc in PE), UV;

**<sup>1</sup>H NMR** (500 MHz, CDCl<sub>3</sub>) δ 7.34 – 7.28 (m, 4H), 7.22 (t, *J* = 7.0 Hz, 1H), 6.49 (s, 2H), 4.09 (t, *J* = 7.9 Hz, 1H), 3.84 (s, 6H), 3.83 (s, 3H), 3.64 (t, *J* = 6.4 Hz, 2H), 2.36 – 2.28 (m, 2H);

**<sup>13</sup>C NMR** (126 MHz, CDCl<sub>3</sub>) δ 153.2, 144.3, 140.3, 136.4, 128.6, 127.7, 126.4, 104.9, 61.0, 60.8, 56.1, 47.6, 38.4;

**HRMS** (ESI) calcd. for C<sub>18</sub>H<sub>22</sub>NaO<sub>4</sub> [M+Na]<sup>+</sup> *m/z* 325.1410, found 325.1409;

**IR** (neat, cm<sup>-1</sup>) 3346(br), 2969, 1588, 1122, 702;

[α]<sub>D</sub><sup>20</sup> = –0.4 (*c* = 1.2, CHCl<sub>3</sub>); 96% *ee*;

**HPLC analysis** CHIRALCEL OD-H column, 10% *i*PrOH in hexane, 1.0 mL/min, 220 nm UV detector, *t*<sub>R</sub> (minor) = 13.8 min, *t*<sub>R</sub> (major) = 16.9 min.

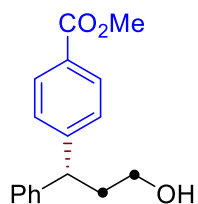

**Methyl (R)-4-(3-hydroxy-1-phenylpropyl)benzoate** (Figure 5, **7e**). From **Methyl 4-bromobenzoate** (86.0 mg, 0.40 mmol), the title compound was prepared following the general procedure **B** using NiCl<sub>2</sub>·glyme (2.2 mg, 5.0 mol%), **L\*** (7.2 mg, 6.0 mol%), (±)-

**L2** (0.50 mg, 1.0 mol%), LiOMe (11.4 mg, 1.5 equiv), allylbenzene (26.5  $\mu$ L, 0.20 mmol), (Bpin)<sub>2</sub> (101.6 mg, 0.40 mmol) and anhydrous dioxane (1.0 mL). The reaction mixture was stirred for 24 h at rt. The crude material was purified by flash column chromatography (0–15% EtOAc in PE) to provide the title compound as a colorless liquid in 53% yield (28.8 mg) with 90:10 rr.

**Rf** 0.3 (20% EtOAc in PE), UV;

<sup>1</sup>H NMR (500 MHz, CDCl<sub>3</sub>)  $\delta$  7.98 (d,  $J$  = 8.4 Hz, 2H), 7.35 (d,  $J$  = 8.3 Hz, 2H), 7.33 – 7.29 (m, 2H), 7.26 (d,  $J$  = 6.9 Hz, 2H), 7.23 (d,  $J$  = 7.2 Hz, 1H), 4.24 (t,  $J$  = 7.9 Hz, 1H), 3.91 (s, 3H), 3.62 (t,  $J$  = 6.4 Hz, 2H), 2.41 – 2.30 (m, 2H);

<sup>13</sup>C NMR (126 MHz, CDCl<sub>3</sub>)  $\delta$  167.0, 149.9, 143.6, 129.9, 128.7, 128.2, 127.9, 127.9, 126.6, 60.7, 52.1, 47.2, 37.9;

**HRMS** (ESI) calcd. for C<sub>17</sub>H<sub>18</sub>NaO<sub>3</sub> [M+Na]<sup>+</sup>  $m/z$  293.1148, found 293.1147;

**IR** (neat, cm<sup>-1</sup>) 3348(br), 2952, 1717, 1276, 698;

$[\alpha]_D^{20}$  = –4.0 ( $c$  = 1.0, CHCl<sub>3</sub>); 94% *ee*;

**HPLC analysis** CHIRALCEL OD-H column, 20% <sup>i</sup>PrOH in hexane, 1.0 mL/min, 220 nm UV detector,  $t_R$  (minor) = 9.0 min,  $t_R$  (major) = 12.9 min.

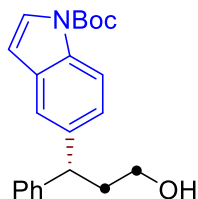

**tert-Butyl (R)-5-(3-hydroxy-1-phenylpropyl)-1H-indole-1-carboxylate** (Figure 5, **7f**).

From **tert-Butyl 5-bromo-1H-indole-1-carboxylate** (118.5 mg, 0.40 mmol), the title compound was prepared following the general procedure **B** using NiCl<sub>2</sub>·glyme (2.2 mg, 5.0 mol%), **L\*** (7.2 mg, 6.0 mol%), ( $\pm$ )-**L2** (0.50 mg, 1.0 mol%), LiOMe (11.4 mg, 1.5 equiv), allylbenzene (26.5  $\mu$ L, 0.20 mmol), (Bpin)<sub>2</sub> (101.6 mg, 0.40 mmol) and anhydrous dioxane (1.0 mL). The reaction mixture was stirred for 24 h at rt. The crude material was purified by flash column chromatography (0–10% EtOAc in PE) to provide the title compound as a colorless liquid in 66% yield (46.3 mg) with 95:5 rr.

**Rf** 0.3 (10% EtOAc in PE), UV;

**<sup>1</sup>H NMR** (500 MHz, CD<sub>3</sub>OD) δ 8.01 (d, *J* = 8.6 Hz, 1H), 7.56 (d, *J* = 3.7 Hz, 1H), 7.48 (s, 1H), 7.30 (d, *J* = 6.7 Hz, 2H), 7.27 (d, *J* = 7.4 Hz, 2H), 7.21 (dd, *J* = 8.6, 1.8 Hz, 1H), 7.14 (t, *J* = 7.2 Hz, 1H), 6.55 (d, *J* = 3.7 Hz, 1H), 4.22 (t, *J* = 7.9 Hz, 1H), 3.51 (t, *J* = 6.6 Hz, 2H), 2.33 (q, *J* = 7.3, 6.7 Hz, 2H), 1.65 (s, 9H);

**<sup>13</sup>C NMR** (126 MHz, CD<sub>3</sub>OD) δ 149.7, 145.3, 139.4, 133.7, 130.8, 128.0, 127.6, 125.7, 125.6, 124.2, 119.5, 114.5, 107.1, 83.4, 59.8, 46.9, 38.3, 26.9;

**HRMS** (ESI) calcd. for C<sub>22</sub>H<sub>25</sub>NNaO<sub>3</sub> [M+Na]<sup>+</sup> *m/z* 374.1727, found 374.1729;

**IR** (neat, cm<sup>-1</sup>) 3348(br), 2974, 1729, 1467, 1371, 1160, 699;

**[α]<sub>D</sub><sup>20</sup>** = -9.2 (*c* = 1.0, CHCl<sub>3</sub>); 95% *ee*;

**HPLC analysis** CHIRALCEL AD-H column, 30% *i*PrOH in hexane, 0.8 mL/min, 220 nm UV detector, *t<sub>R</sub>* (major) = 6.3 min, *t<sub>R</sub>* (minor) = 16.6 min.

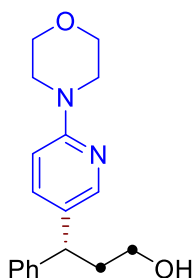

**(*R*)-3-(6-Morpholinopyridin-3-yl)-3-phenylpropan-1-ol** (Figure 5, **7g**). From **4-(5-Bromopyridin-2-yl)morpholine** (97.2 mg, 0.40 mmol), the title compound was prepared following the general procedure **B** using NiCl<sub>2</sub>·glyme (2.2 mg, 5.0 mol%), **L\*** (7.2 mg, 6.0 mol%), (±)-**L2** (0.50 mg, 1.0 mol%), LiOMe (11.4 mg, 1.5 equiv), allylbenzene (26.5 μL, 0.20 mmol), (Bpin)<sub>2</sub> (101.6 mg, 0.40 mmol) and anhydrous dioxane (1.0 mL). The reaction mixture was stirred for 24 h at rt. The crude material was purified by flash column chromatography (0–30% EtOAc in PE) to provide the title compound as a colorless liquid in 47% yield (28.2 mg) with 91:9 *rr*.

**R<sub>f</sub>** 0.2 (30% EtOAc in PE), UV;

**<sup>1</sup>H NMR** (500 MHz, CDCl<sub>3</sub>) δ 8.16 (d, *J* = 2.5 Hz, 1H), 7.40 (dd, *J* = 8.7, 2.5 Hz, 1H), 7.29 (d, *J* = 7.8 Hz, 2H), 7.25 (d, *J* = 7.1 Hz, 2H), 7.20 (t, *J* = 7.2 Hz, 1H), 6.61 (d, *J* = 8.8 Hz, 1H), 4.08 (t, *J* = 7.9 Hz, 1H), 3.82 (t, *J* = 4.9 Hz, 4H), 3.62 (t, *J* = 6.4 Hz, 2H), 3.48 (t, 4H), 2.34 – 2.24 (m, 2H);

$^{13}\text{C}$  NMR (126 MHz,  $\text{CDCl}_3$ )  $\delta$  158.1, 146.5, 144.1, 137.6, 129.8, 128.6, 127.7, 126.4, 107.2, 66.7, 60.7, 45.8, 43.9;

HRMS (ESI) calcd. for  $\text{C}_{18}\text{H}_{22}\text{N}_2\text{NaO}_2$   $[\text{M}+\text{Na}]^+$   $m/z$  321.1573, found 321.1568;

IR (neat,  $\text{cm}^{-1}$ ) 3348(br), 2968, 1603, 1490, 1243, 699;

$[\alpha]_{\text{D}}^{20} = -1.6$  ( $c = 1.0$ ,  $\text{CHCl}_3$ ); 93% *ee*;

HPLC analysis CHIRALCEL AD-H column, 20%  $i$ PrOH in hexane, 1.0 mL/min, 220 nm UV detector,  $t_{\text{R}}$  (major) = 12.2 min,  $t_{\text{R}}$  (minor) = 14.6 min.

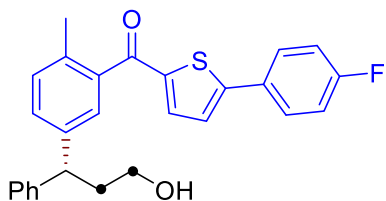

**(R)-(5-(4-Fluorophenyl)thiophen-2-yl)(5-(3-hydroxy-1-phenylpropyl)-2-methylphenyl)methanone** (Figure 5, **7h**). From **(5-Bromo-2-methylphenyl)(5-(4-fluorophenyl)thiophen-2-yl)methanone** (150.1 mg, 0.40 mmol), the title compound was prepared following the general procedure **B** using  $\text{NiCl}_2 \cdot \text{glyme}$  (2.2 mg, 5.0 mol%), **L\*** (7.2 mg, 6.0 mol%),  $(\pm)\text{-L2}$  (0.50 mg, 1.0 mol%), LiOMe (11.4 mg, 1.5 equiv), allylbenzene (26.5  $\mu\text{L}$ , 0.20 mmol),  $(\text{Bpin})_2$  (101.6 mg, 0.40 mmol) and anhydrous dioxane (1.0 mL). The reaction mixture was stirred for 24 h at rt. The crude material was purified by flash column chromatography (0–20% EtOAc in PE) to provide the title compound as a colorless liquid in 44% yield (38.1 mg) with 92:8 rr.

*Rf* 0.4 (20% EtOAc in PE), UV;

$^1\text{H}$  NMR (500 MHz,  $\text{CDCl}_3$ )  $\delta$  7.65 (dd,  $J = 8.8, 5.2$  Hz, 2H), 7.39 (d,  $J = 1.9$  Hz, 1H), 7.31 (t,  $J = 7.3$  Hz, 3H), 7.27 (d,  $J = 6.3$  Hz, 3H), 7.25 – 7.20 (m, 3H), 7.14 (t,  $J = 8.6$  Hz, 2H), 4.20 (t,  $J = 7.9$  Hz, 1H), 3.64 (t,  $J = 6.4$  Hz, 2H), 2.37 (s, 3H), 2.33 (q,  $J = 6.4$  Hz, 2H);

$^{13}\text{C}$  NMR (126 MHz,  $\text{CDCl}_3$ )  $\delta$  190.2, 163.3 (d,  $J = 250.2$  Hz), 152.7, 144.2, 143.5, 141.7, 138.2, 136.5, 134.5, 131.4, 129.9, 129.6 (d,  $J = 3.5$  Hz), 128.6, 128.2 (d,  $J = 8.5$  Hz), 127.8, 127.7, 126.5, 124.0, 116.3 (d,  $J = 22.0$  Hz), 60.9, 46.7, 37.9, 19.3;

$^{19}\text{F}$  NMR (471 MHz,  $\text{CDCl}_3$ )  $\delta$  -111.6;

HRMS (ESI) calcd. for  $\text{C}_{27}\text{H}_{23}\text{FNaO}_2\text{S}$   $[\text{M}+\text{Na}]^+$   $m/z$  453.1295, found 453.1292;



IR (neat,  $\text{cm}^{-1}$ ) 3348(br), 2971, 1630, 1437, 1055, 698;

$[\alpha]_{\text{D}}^{20} = +24.4$  ( $c = 1.5$ ,  $\text{CHCl}_3$ ); 94% *ee*;

HPLC analysis CHIRALCEL AD-H column, 20% *i*PrOH in hexane, 1.0 mL/min, 220 nm UV detector,  $t_{\text{R}}$  (major) = 18.7 min,  $t_{\text{R}}$  (minor) = 22.9 min.

## 2.8. Tracing Experiment

Supplementary Table 7. Tracing experiment for the enantioselective  $\text{C}(\text{sp}^3)\text{-H}$  arylation

| Entry | Reaction time | GC yield <b>3a</b> [%] <sup>a</sup> | <b>1a</b> : <b>1a'</b> : <b>1a''</b> <sup>b</sup> |
|-------|---------------|-------------------------------------|---------------------------------------------------|
| 1     | 1 h           | 6                                   | 71:19:10                                          |
| 2     | 2 h           | 10                                  | 35:42:23                                          |
| 3     | 4 h           | 46                                  | 0:55:45                                           |
| 4     | 6 h           | 78                                  | 0:36: 64                                          |
| 5     | 12 h          | 92                                  | trace                                             |

**1a**: Ph-CH2-CH2-CH=CH2  
**1a'**: Ph-CH=CH-CH2-CH3  
**1a''**: Ph-CH2-CH=CH-CH3

<sup>a</sup>Yields were determined by GC using dodecane as the internal standard. <sup>b</sup>The ratio of **1a**, **1a'** and **1a''** was determined by GC and GC-MS analysis.

## 2.9. Olefin Isomerization in the Absence of Aryl Iodide

Supplementary Table 8. Olefin isomerization in the absence of aryl iodide for the enantioselective  $\text{C}(\text{sp}^3)\text{-H}$  arylation

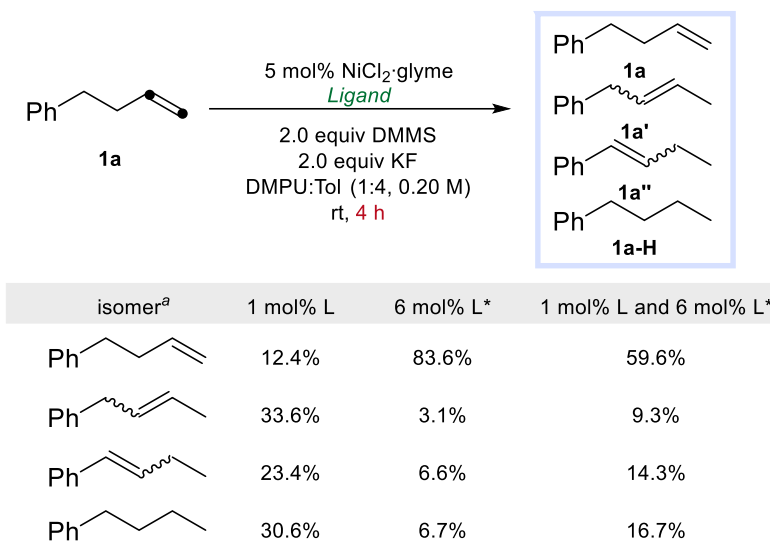

<sup>a</sup>The ratio of **1a**, **1a'**, **1a''** and **1a-H** was determined by GC and GC-MS analysis.

## 2.10. NiD Experiment

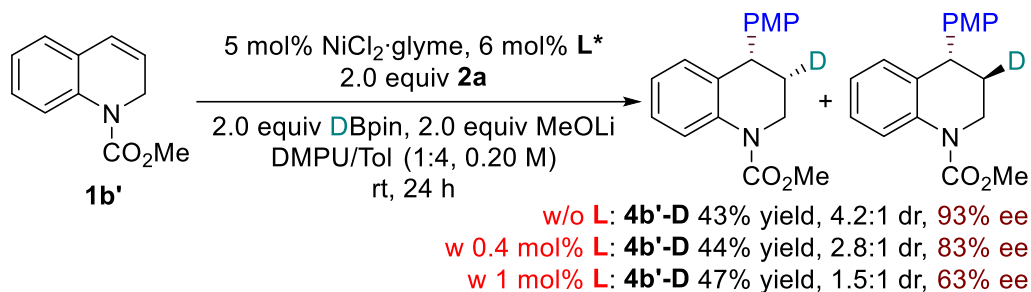

**Methyl (3*S*,4*S*)-4-(4-methoxyphenyl)-3,4-dihydroquinoline-1(2*H*)-carboxylate-3-*d*** (Figure 6, **4b'-D**). From **Methyl quinoline-1(2*H*)-carboxylate** (18.9 mg, 0.1 mmol), the title compound was prepared following the general procedure **A** using NiCl<sub>2</sub>·glyme (1.1 mg, 5.0 mol%), **L\*** (3.6 mg, 6.0 mol%), LiOMe (7.6 mg, 2.0 equiv), 4-iodoanisole (**2a**) (47.0 mg, 0.20 mmol, 2.0 equiv), DBpin (29 μL, 0.20 mmol), anhydrous toluene (0.40 mL) and DMPU (0.10 mL). The reaction mixture was stirred for 24 h at rt. The crude material was purified by flash column chromatography (0–5% EtOAc in PE) to provide the title compound as a colorless liquid in **43% yield (13.4 mg) (w/o L)**, **44% yield (13.6 mg) (w 0.4 mol% L)**, **47% yield (14.5 mg) (w 1 mol% L)**.

**w/o L:**

**<sup>1</sup>H NMR** (500 MHz, CDCl<sub>3</sub>) δ 7.78 (d, *J* = 8.4 Hz, 1H), 7.25 – 7.19 (m, 1H), 7.06 (d, *J* = 8.7 Hz, 2H), 7.01 – 6.96 (m, 1H), 6.87 (d, *J* = 8.6 Hz, 3H), 4.09 (d, *J* = 6.0 Hz, 1H), 3.91 – 3.79 (m, 7H), 3.78 – 3.73 (m, 1H), [2.30 – 2.23 (m, 0.84H) & 2.08 – 2.01 (m, 0.20H), *due to dr*];

[α]<sub>D</sub><sup>20</sup> = +33.7 (*c* = 2.0, CHCl<sub>3</sub>); 93% *ee*;

**HPLC analysis** CHIRALCEL OJ-H column, 20% <sup>i</sup>PrOH in hexane, 1.0 mL/min, 220 nm UV detector, *t*<sub>R</sub> (minor) = 13.9 min, *t*<sub>R</sub> (major) = 21.5 min.

***w* 0.4 mol% L:**

**<sup>1</sup>H NMR** (500 MHz, CDCl<sub>3</sub>) δ 7.78 (d, *J* = 8.4 Hz, 1H), 7.25 – 7.19 (m, 1H), 7.06 (d, *J* = 8.7 Hz, 2H), 7.01 – 6.96 (m, 1H), 6.87 (d, *J* = 8.6 Hz, 3H), 4.09 (d, *J* = 6.0 Hz, 1H), 3.91 – 3.79 (m, 7H), 3.78 – 3.73 (m, 1H), [2.30 – 2.23 (m, 0.72H) & 2.08 – 2.01 (m, 0.26H), *due to dr*];

[α]<sub>D</sub><sup>20</sup> = +21.1 (*c* = 2.0, CHCl<sub>3</sub>); 83% *ee*;

**HPLC analysis** CHIRALCEL OJ-H column, 20% <sup>i</sup>PrOH in hexane, 1.0 mL/min, 220 nm UV detector, *t*<sub>R</sub> (minor) = 13.8 min, *t*<sub>R</sub> (major) = 21.3 min.

***w* 1 mol% L:**

**<sup>1</sup>H NMR** (500 MHz, CDCl<sub>3</sub>) δ 7.78 (d, *J* = 8.4 Hz, 1H), 7.25 – 7.19 (m, 1H), 7.06 (d, *J* = 8.7 Hz, 2H), 7.01 – 6.96 (m, 1H), 6.87 (d, *J* = 8.6 Hz, 3H), 4.09 (d, *J* = 6.0 Hz, 1H), 3.91 – 3.79 (m, 7H), 3.78 – 3.73 (m, 1H), [2.30 – 2.23 (m, 0.61H) & 2.08 – 2.01 (m, 0.41H), *due to dr*];

[α]<sub>D</sub><sup>20</sup> = +9.9 (*c* = 2.0, CHCl<sub>3</sub>); 63% *ee*;

**HPLC analysis** CHIRALCEL OJ-H column, 20% <sup>i</sup>PrOH in hexane, 1.0 mL/min, 220 nm UV detector, *t*<sub>R</sub> (minor) = 13.9 min, *t*<sub>R</sub> (major) = 21.5 min.

## 2.11. Computational Study

### Computational details

All calculations were performed with Gaussian 09 program<sup>3</sup>. Geometry optimizations were performed using (U)B3LYP functionals<sup>4,5</sup>, and LANL2DZ pseudo-potential<sup>6,7</sup> was set for Ni and I atoms and 6-31G(d) basis set for all the other atoms. After optimization, frequency calculations were subsequently performed to confirm that all stationary points had correct number of imaginary frequencies (zero for minima and one for transition

states) and to provide thermodynamic corrections at 298 K, 1 atm. For all transition states, Intrinsic Reaction Coordinate (IRC)<sup>8</sup> were calculated to confirm that they indeed connected between correct minima. Single-point energies of optimized structures were calculated using (U)M06 functionals<sup>9</sup> with SDD<sup>10,11</sup> for Ni and I atoms and 6-311+G(d,p) for all the other atoms. SMD solvation model<sup>12</sup> was used in single-point energy calculations to consider solvent effect, while dichloromethane ( $\epsilon = 8.93$ ) was set as implicit solvent to fit the polarity of the mixed solvent in experiments (DMPU [ $\epsilon = 36.12$ ]<sup>13</sup>: toluene [ $\epsilon = 2.37$ ] = 1:4). The final Gibbs free energy was calculated as the sum of Gibbs free energy correction (from frequency calculation) and the single point energy in solution. For each species, extensive conformational search was done and the reported value is from the conformer with the lowest Gibbs free energy. See supplementary data 1 for detailed energies and atom coordinates for all computed species.

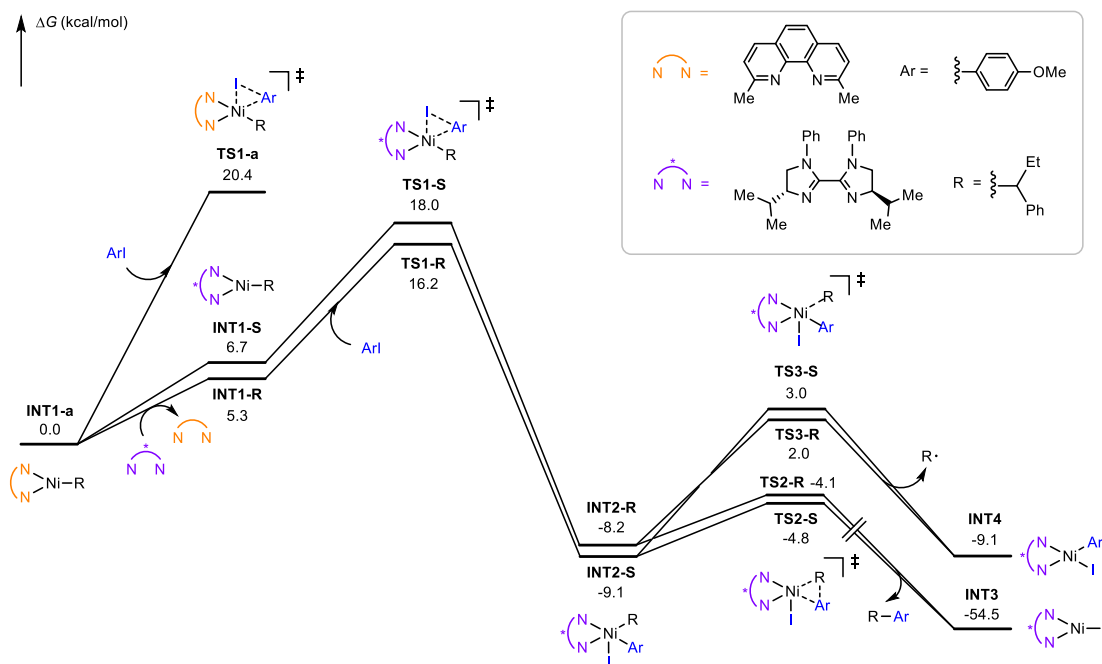

**Supplementary Fig 4.** Potential energy surface of multi-ligand enabled asymmetric arylation. Computed at SMD(DCM)-(U)M06/6-311+G(d,p)[SDD for Ni and I]/(U)B3LYP/6-31G(d)[LANL2DZ for Ni and I]. Values are relative Gibbs free energies in kcal/mol.

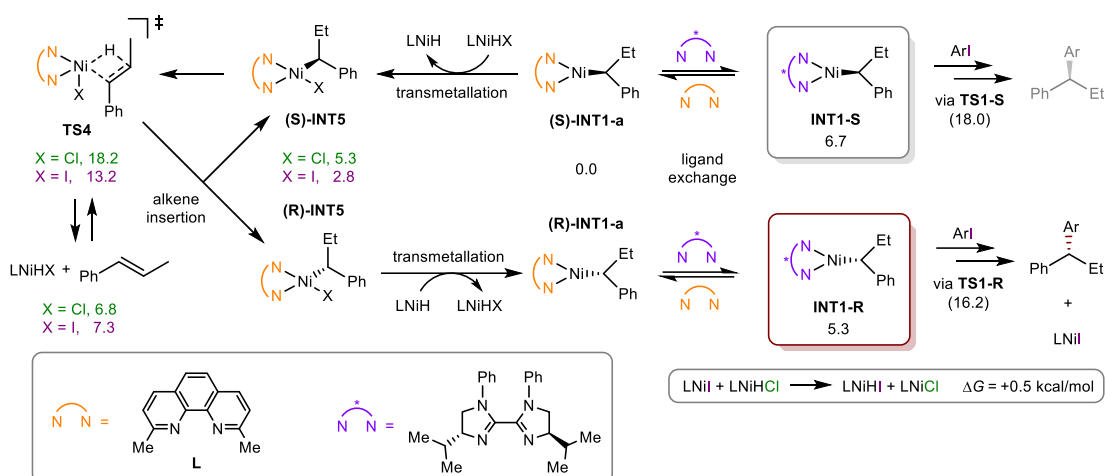

**Supplementary Fig 5.** Conversion of **INT1-S** to **INT1-R** via a reversible ligand exchange, transmetalation and alkene insertion process. Computed at SMD(DCM)-(U)M06/6-311+G(d,p)[SDD for Ni and I]/(U)B3LYP/6-31G(d)[LANL2DZ for Ni and I]. Values are relative Gibbs free energies in kcal/mol. When X = Cl (from NiCl<sub>2</sub>), the interconversion needs an activation free energy of 18.2 kcal/mol, which is very close to that of the undesired oxidative addition via **TS1-S** (18.0 kcal/mol). However, as the reaction proceeds, LNiI generates, which can undergo the exchange reaction with LNiHCl to give LNiHI. This process is approximately neutral in energy (+0.5 kcal/mol). When X = I, the barrier for the interconversion is lowered to 13.2 kcal/mol, ensuring a fast conversion of **INT1-S** to **INT1-R**.

## 2.12. Spectroscopic Data (NMR Spectrum)

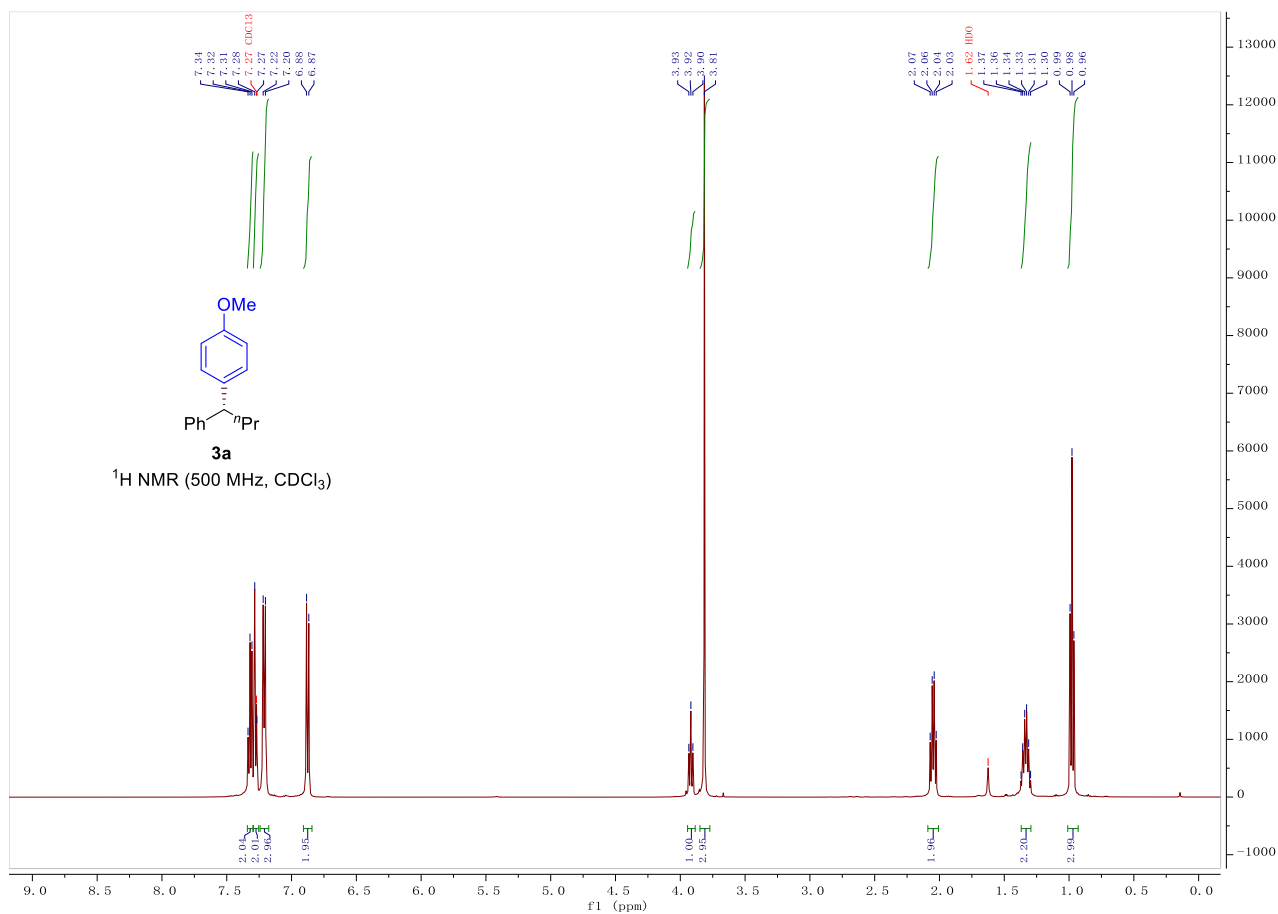

Supplementary Fig. 6. <sup>1</sup>H NMR of compound 3a

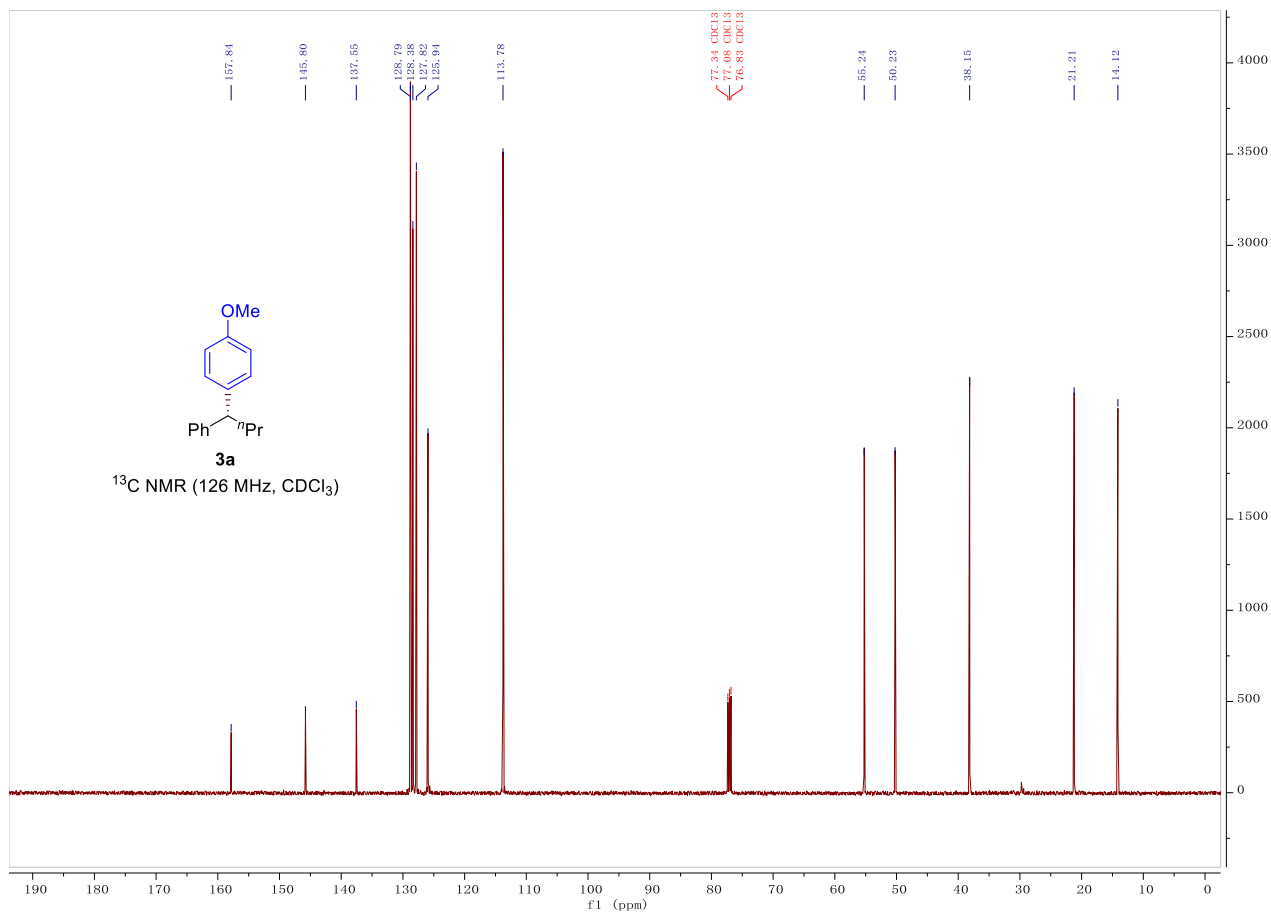

Supplementary Fig. 7. <sup>13</sup>C NMR of compound 3a

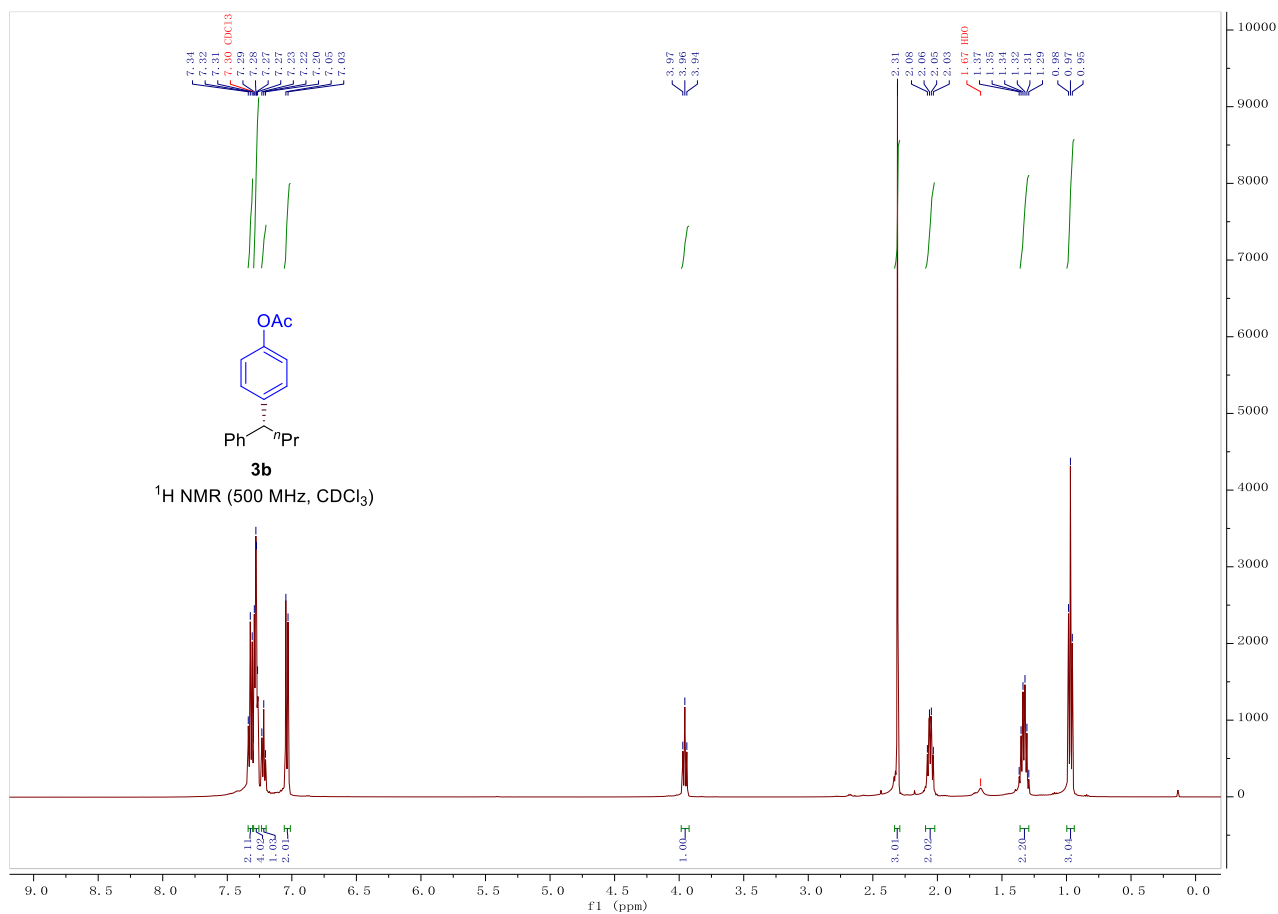

Supplementary Fig. 8. <sup>1</sup>H NMR of compound **3b**

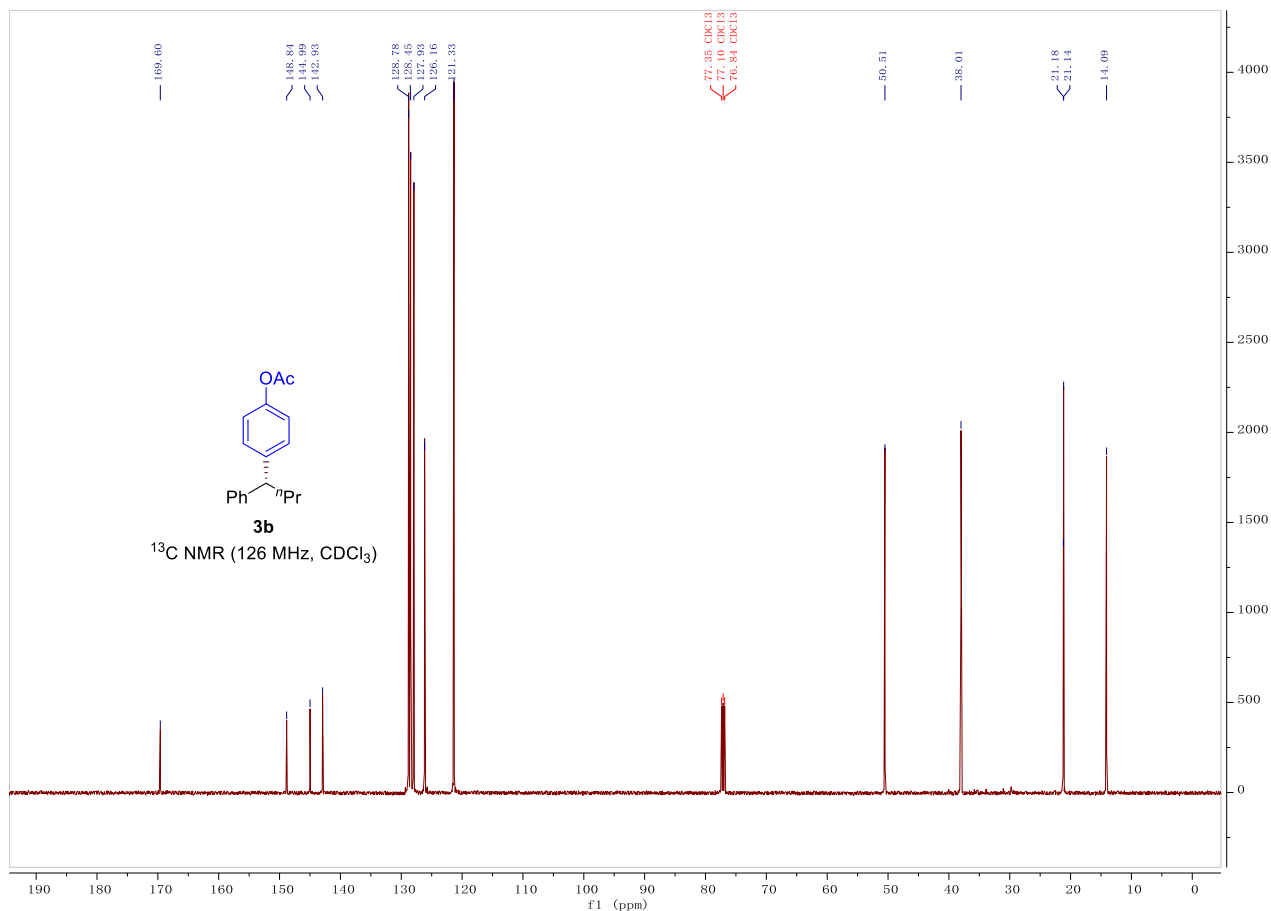

Supplementary Fig. 9. <sup>13</sup>C NMR of compound **3b**

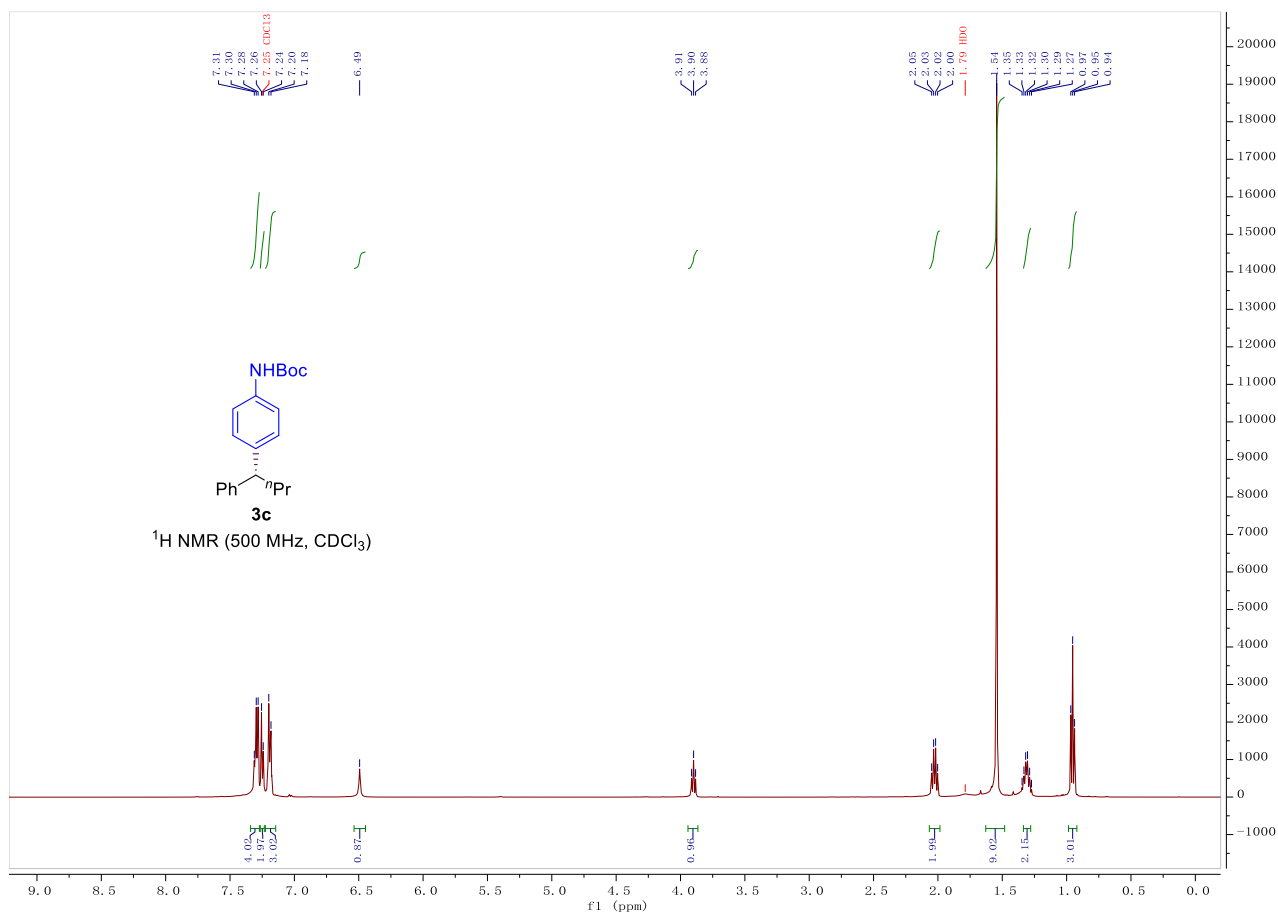

**Supplementary Fig. 10.** <sup>1</sup>H NMR of compound **3c**

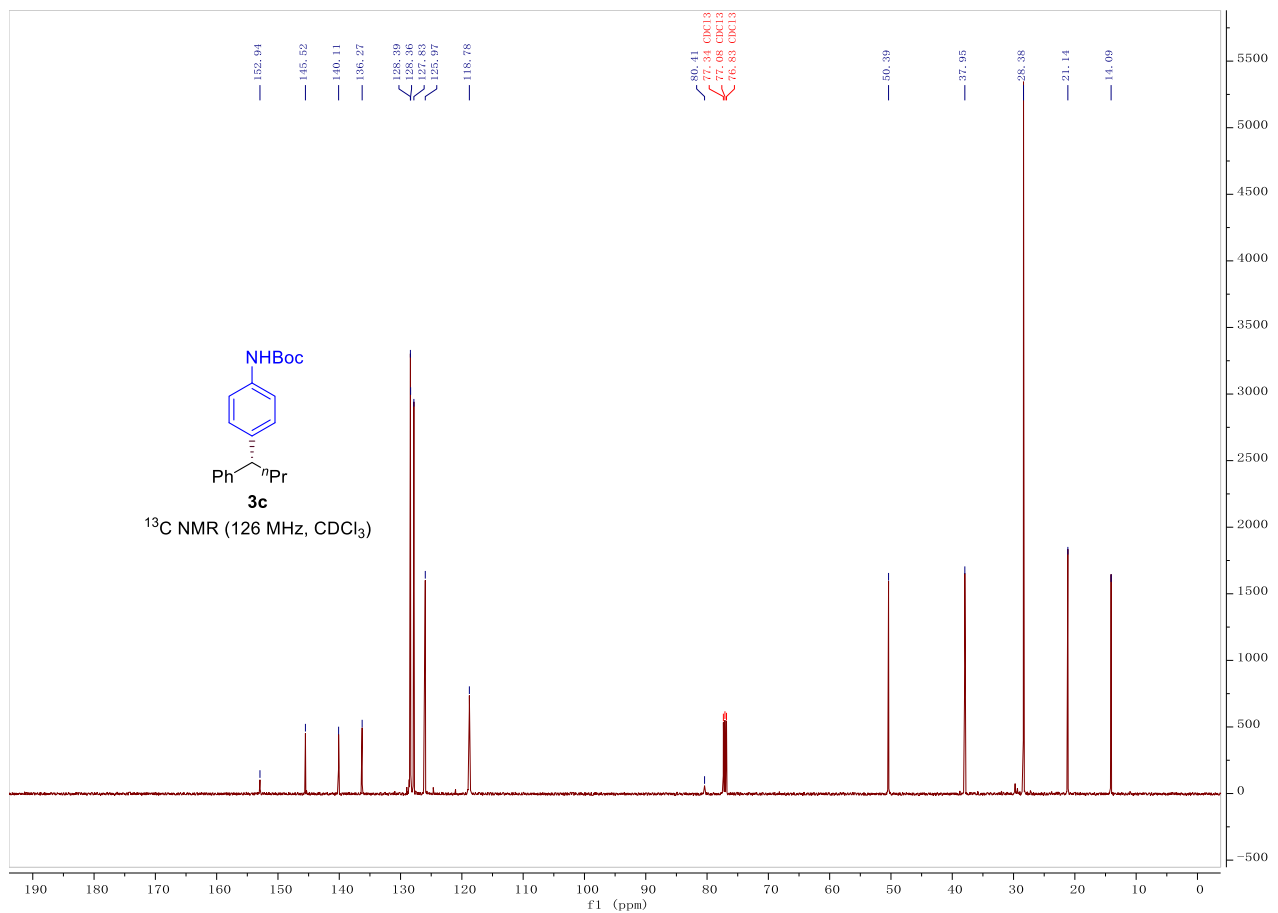

**Supplementary Fig. 11.** <sup>13</sup>C NMR of compound **3c**



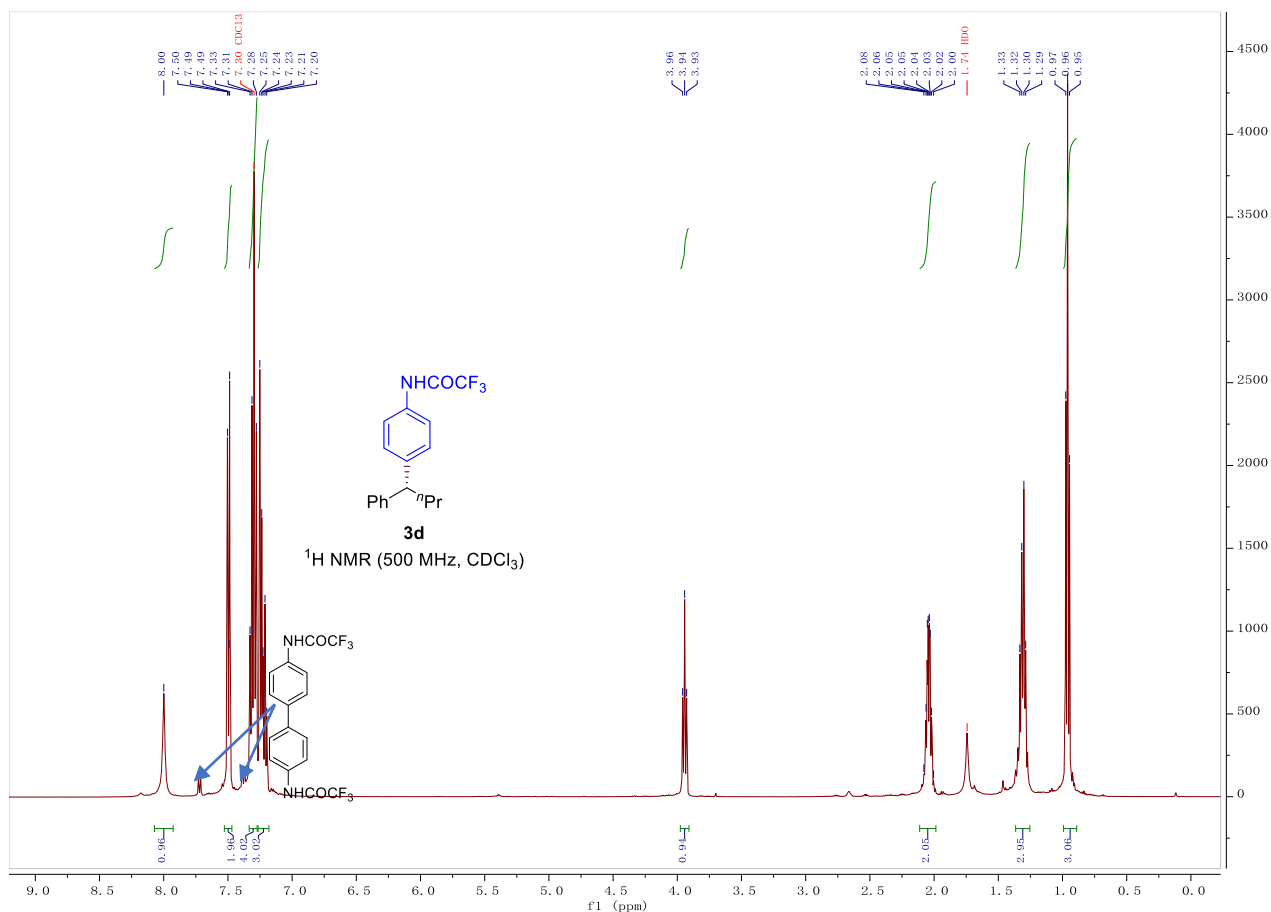

**Supplementary Fig. 12.** <sup>1</sup>H NMR of compound **3d**

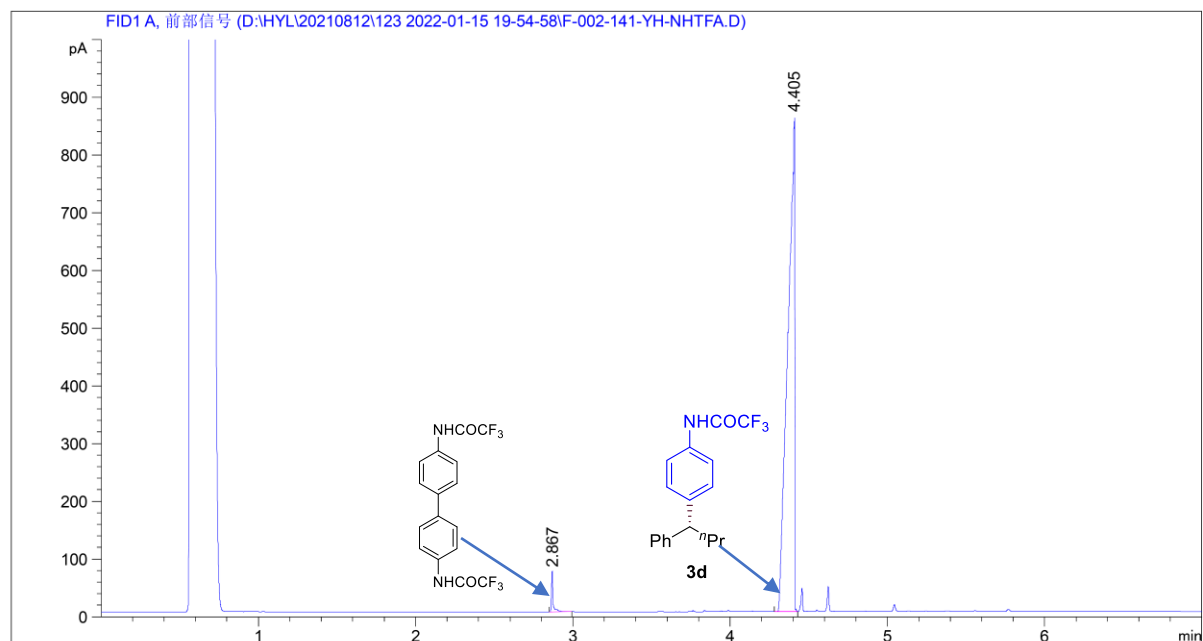

| Peak # | RetTime [min] | Type | Width [min] | Area [pA*s] | Height [pA] | Area %   |
|--------|---------------|------|-------------|-------------|-------------|----------|
| 1      | 2.867         | BB   | 0.0115      | 49.50231    | 69.88297    | 1.85979  |
| 2      | 4.405         | BV   | 0.0379      | 2612.21851  | 857.58795   | 98.14021 |

**Supplementary Fig. 13.** GC trace of compound **3d**

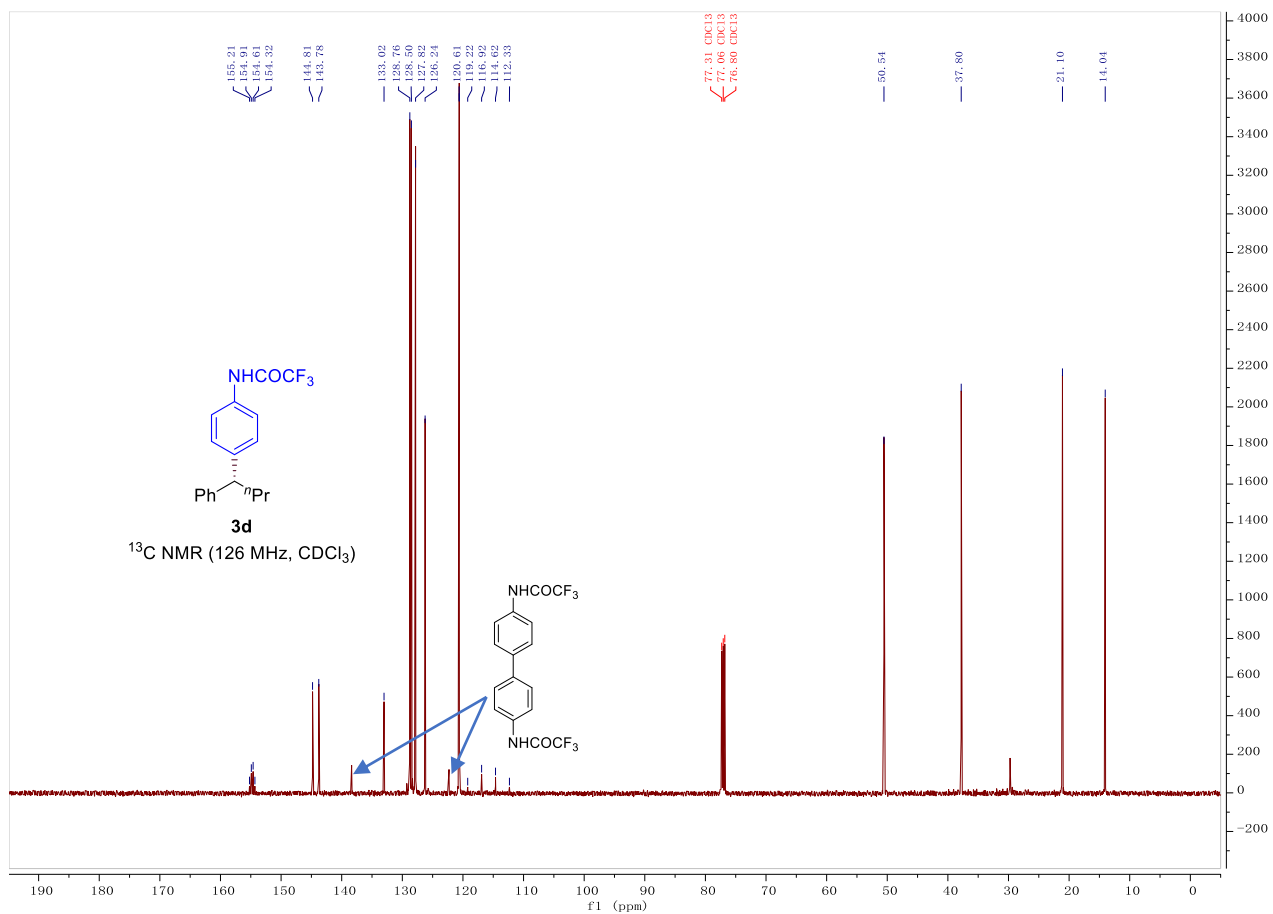

**Supplementary Fig. 14.** <sup>13</sup>C NMR of compound **3d**

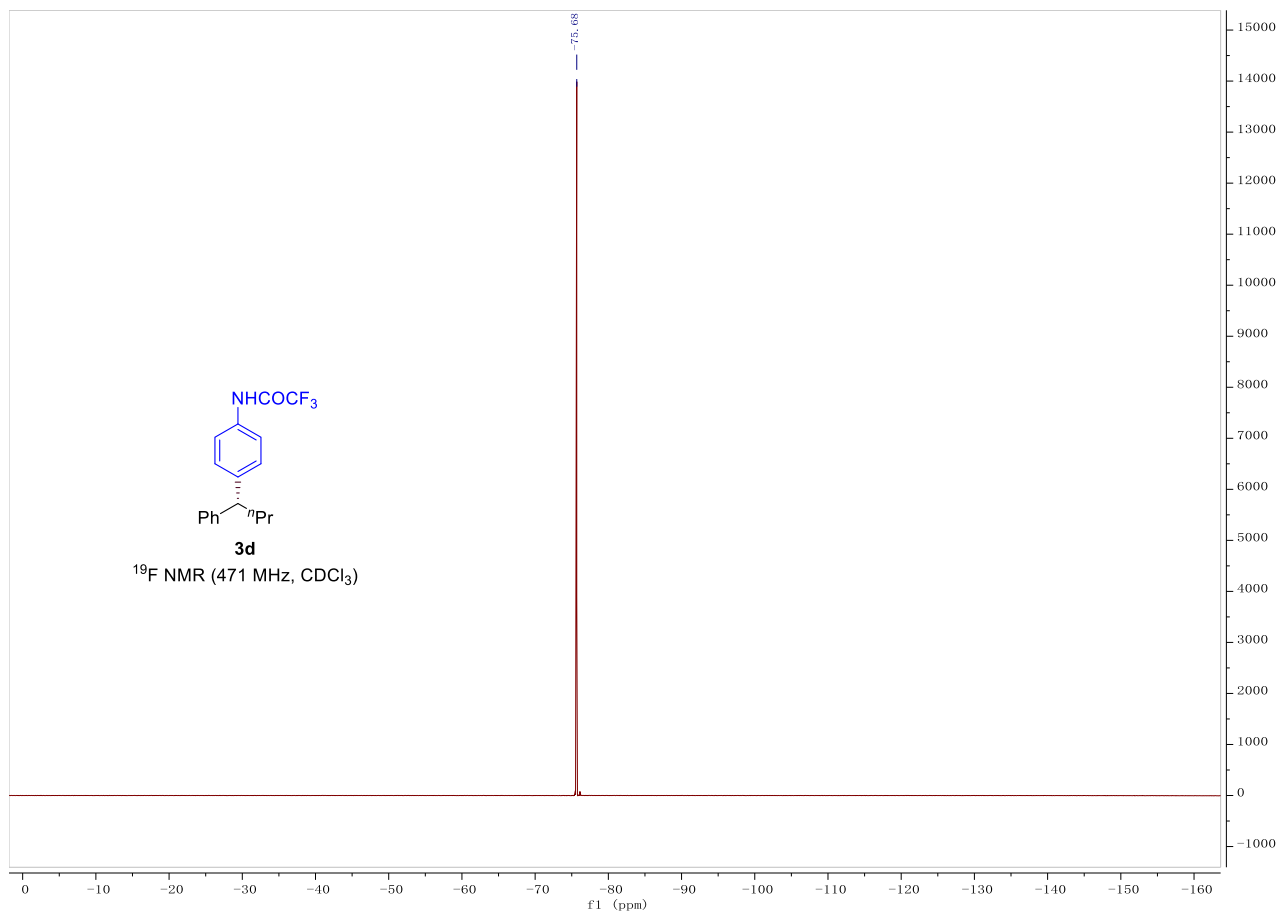

**Supplementary Fig. 15.** <sup>19</sup>F NMR of compound **3d**

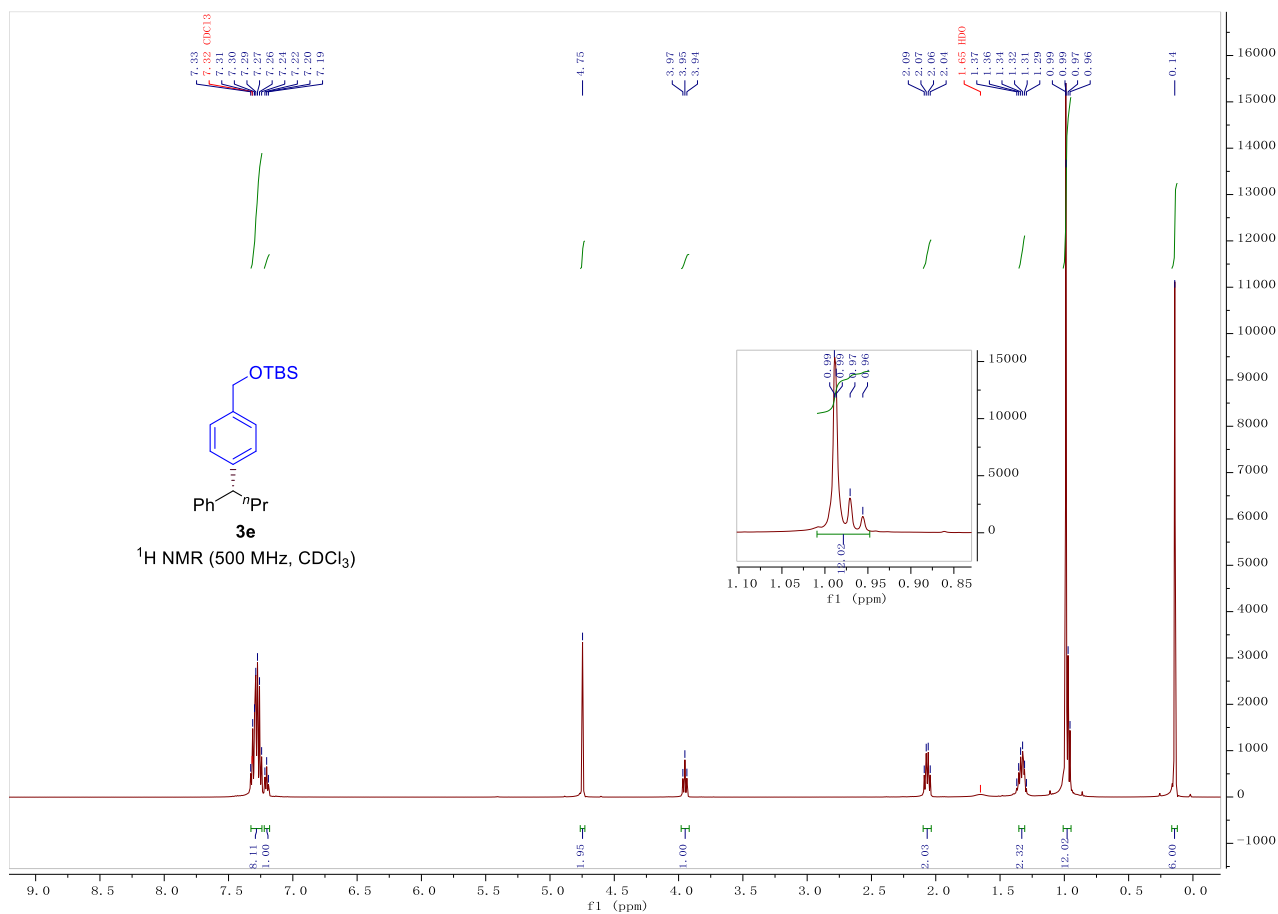

**Supplementary Fig. 16.  $^1\text{H}$  NMR of compound **3e****

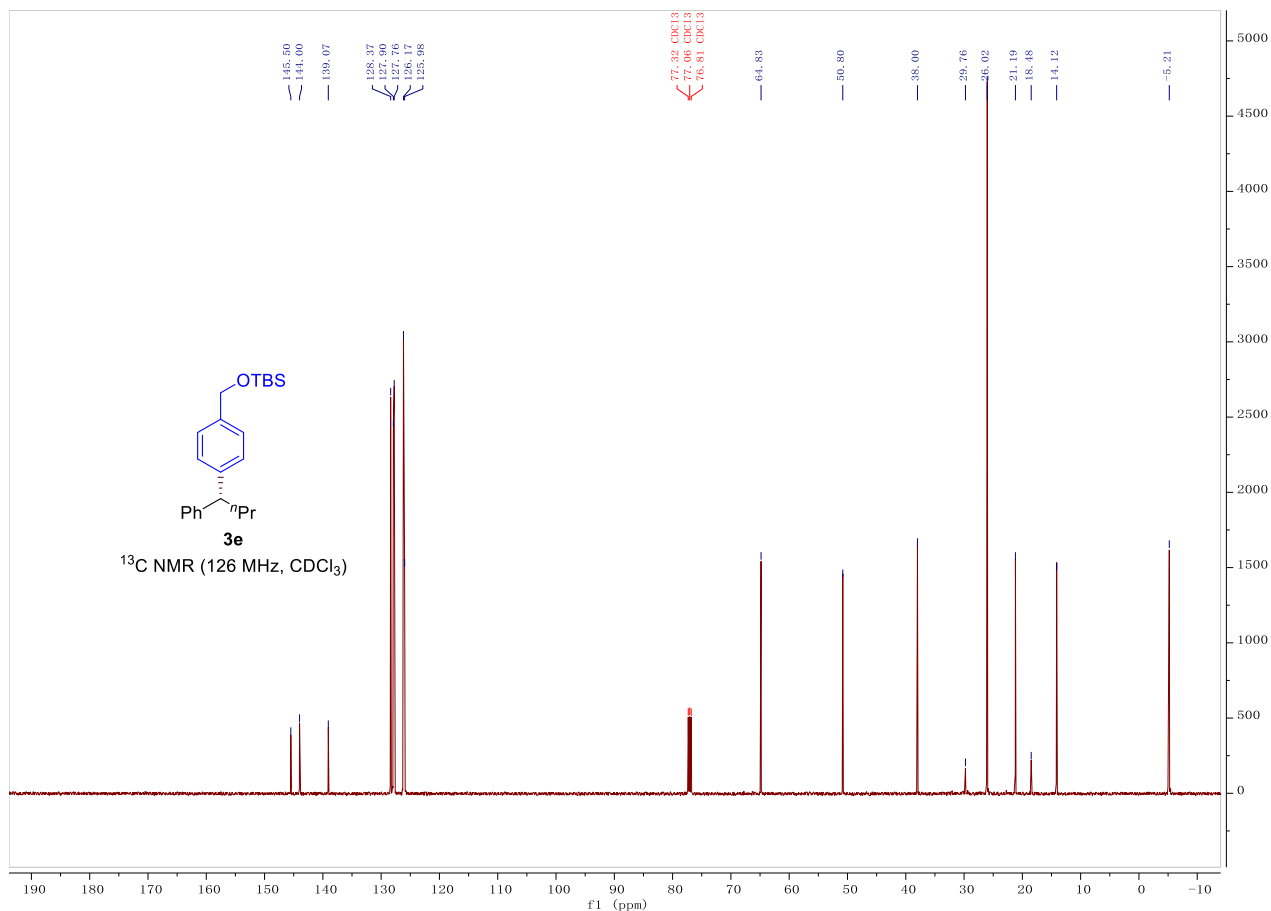

**Supplementary Fig. 17.  $^{13}\text{C}$  NMR of compound **3e****

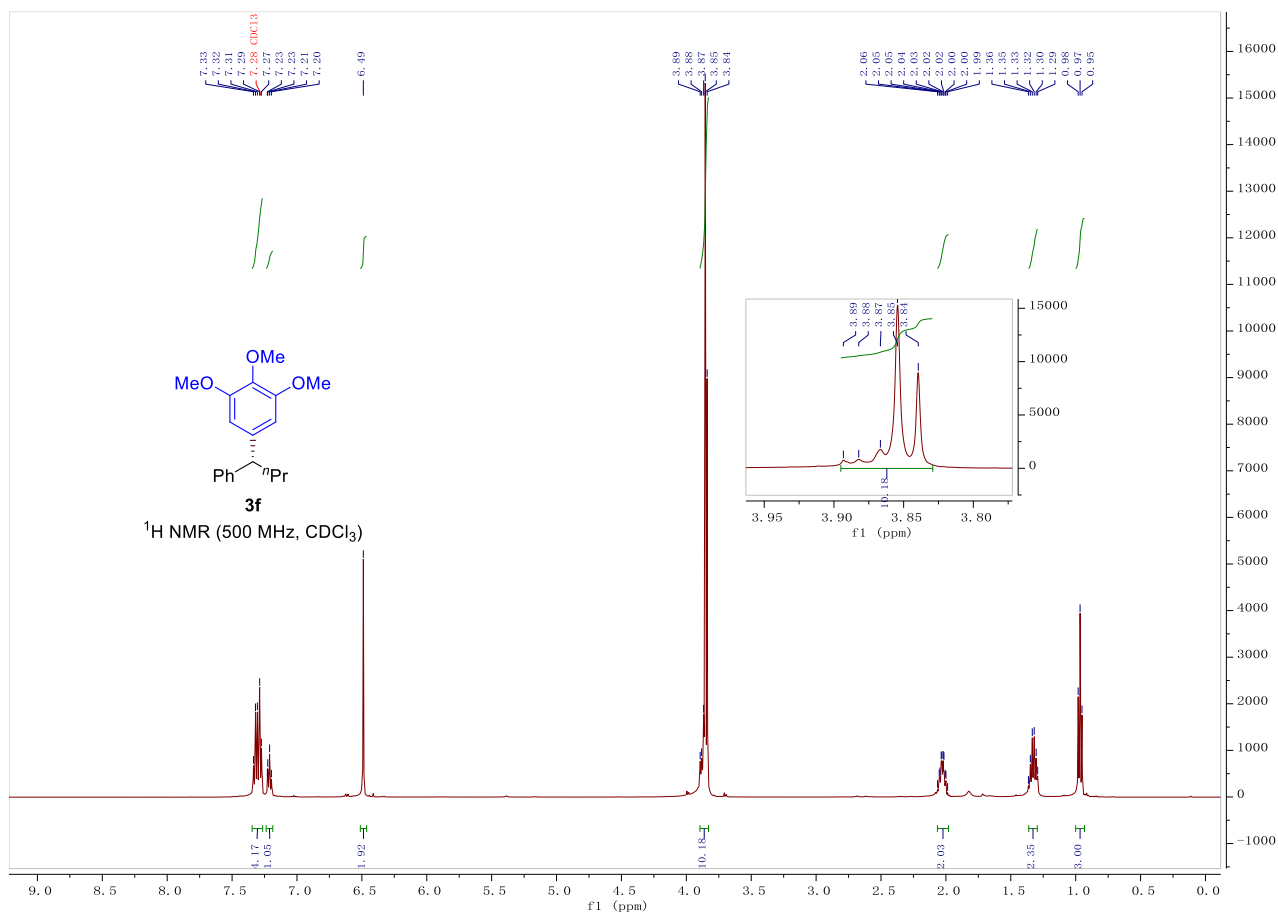

**Supplementary Fig. 18.** <sup>1</sup>H NMR of compound **3f**

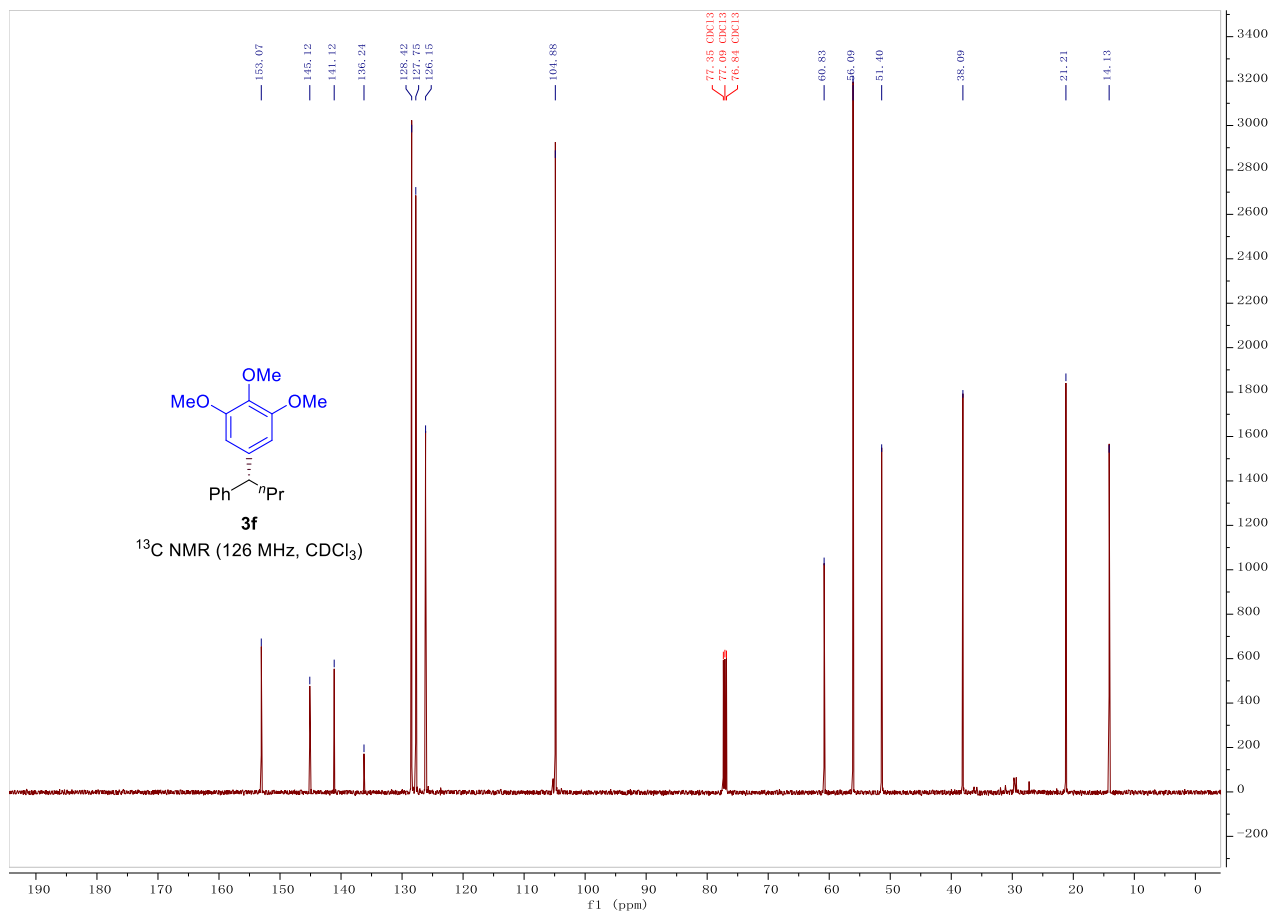

**Supplementary Fig. 19.** <sup>13</sup>C NMR of compound **3f**

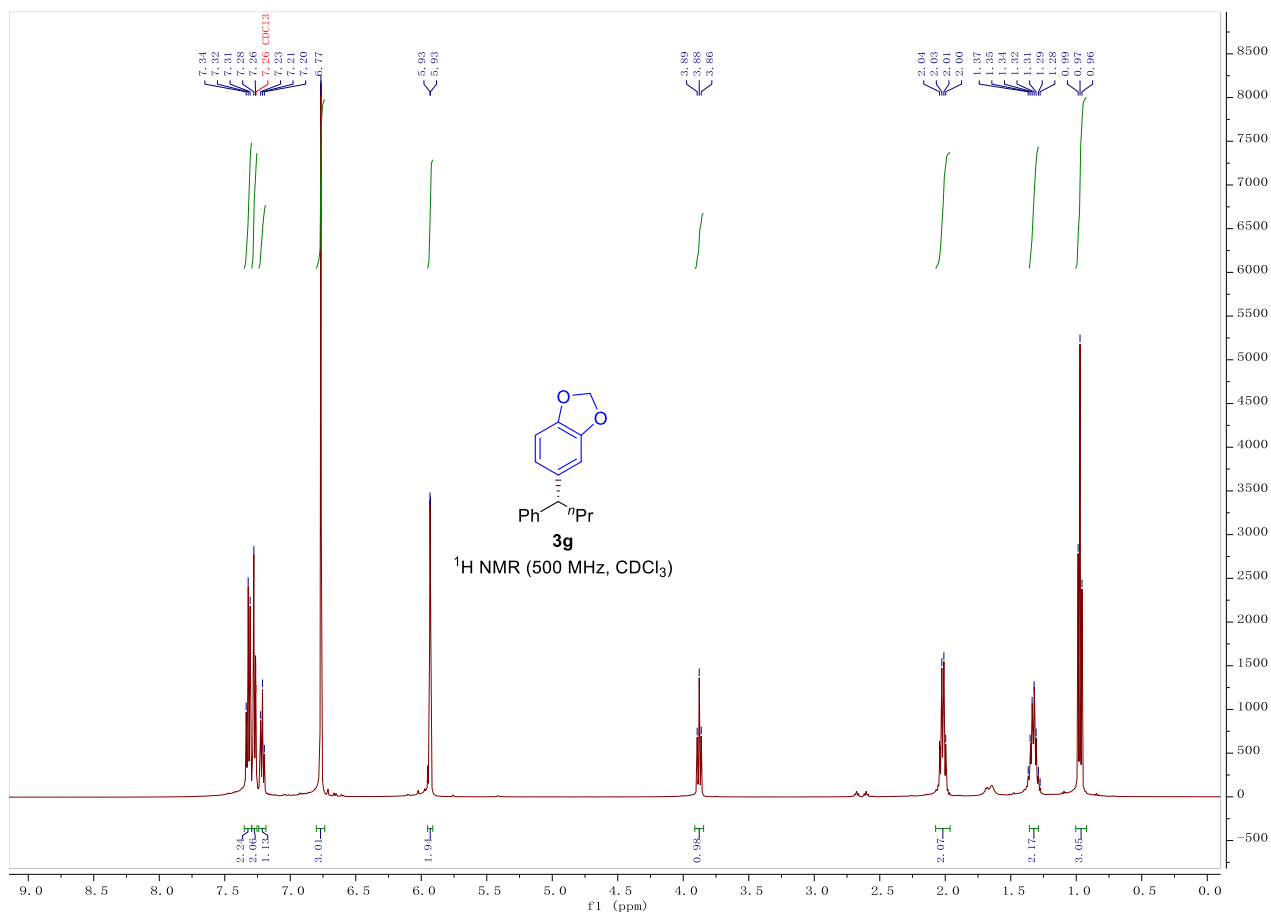

**Supplementary Fig. 20.** <sup>1</sup>H NMR of compound **3g**

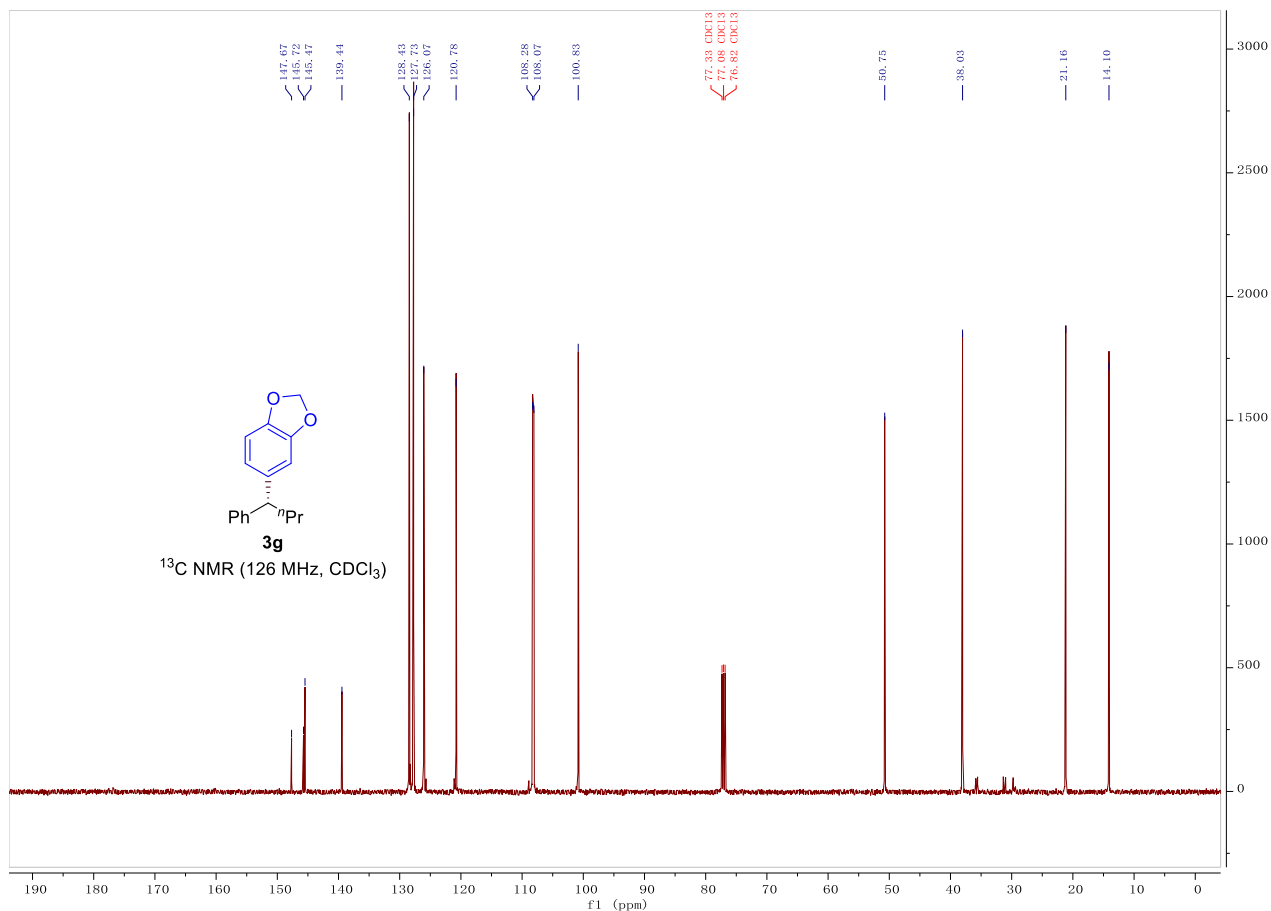

**Supplementary Fig. 21.** <sup>13</sup>C NMR of compound **3g**

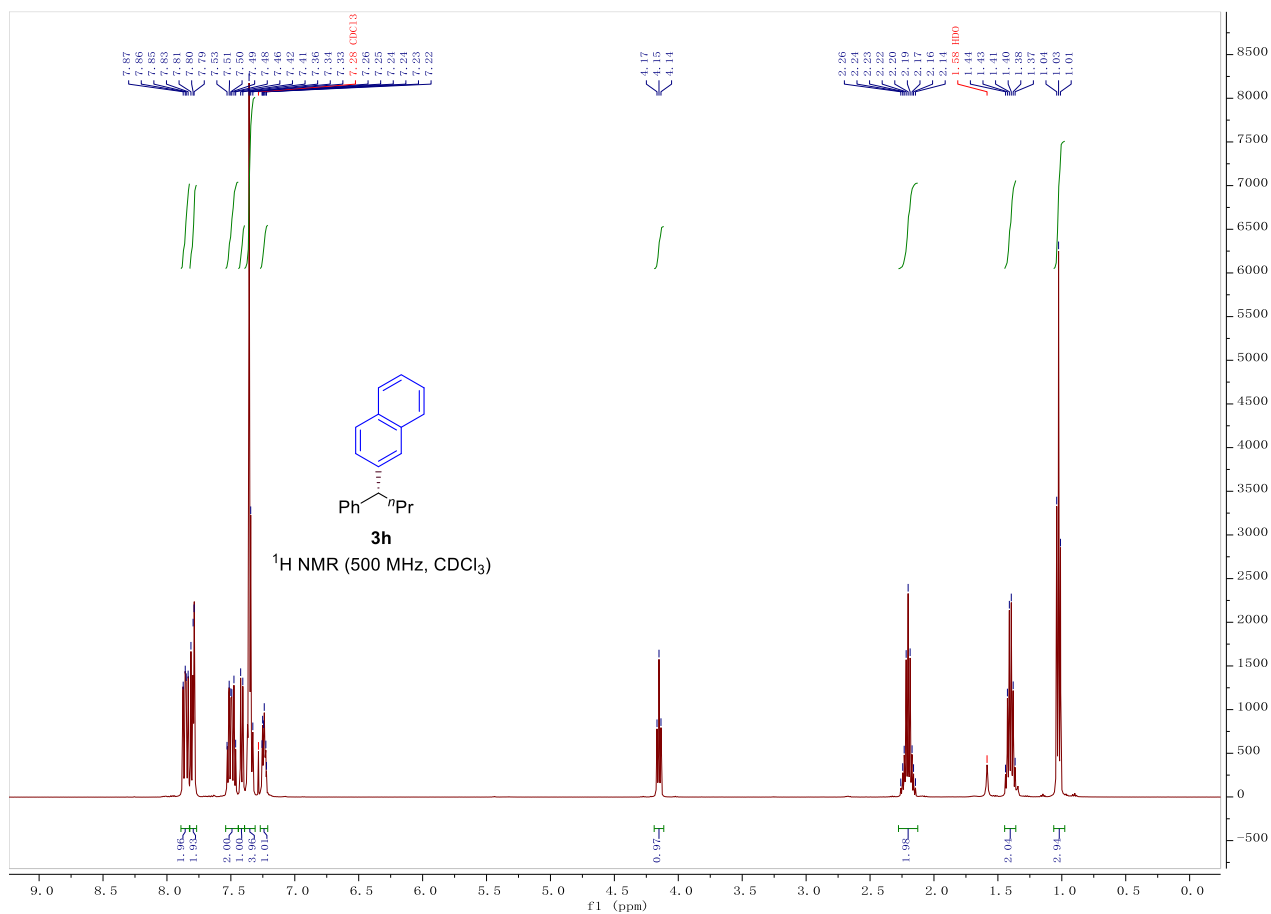

**Supplementary Fig. 22.** <sup>1</sup>H NMR of compound **3h**

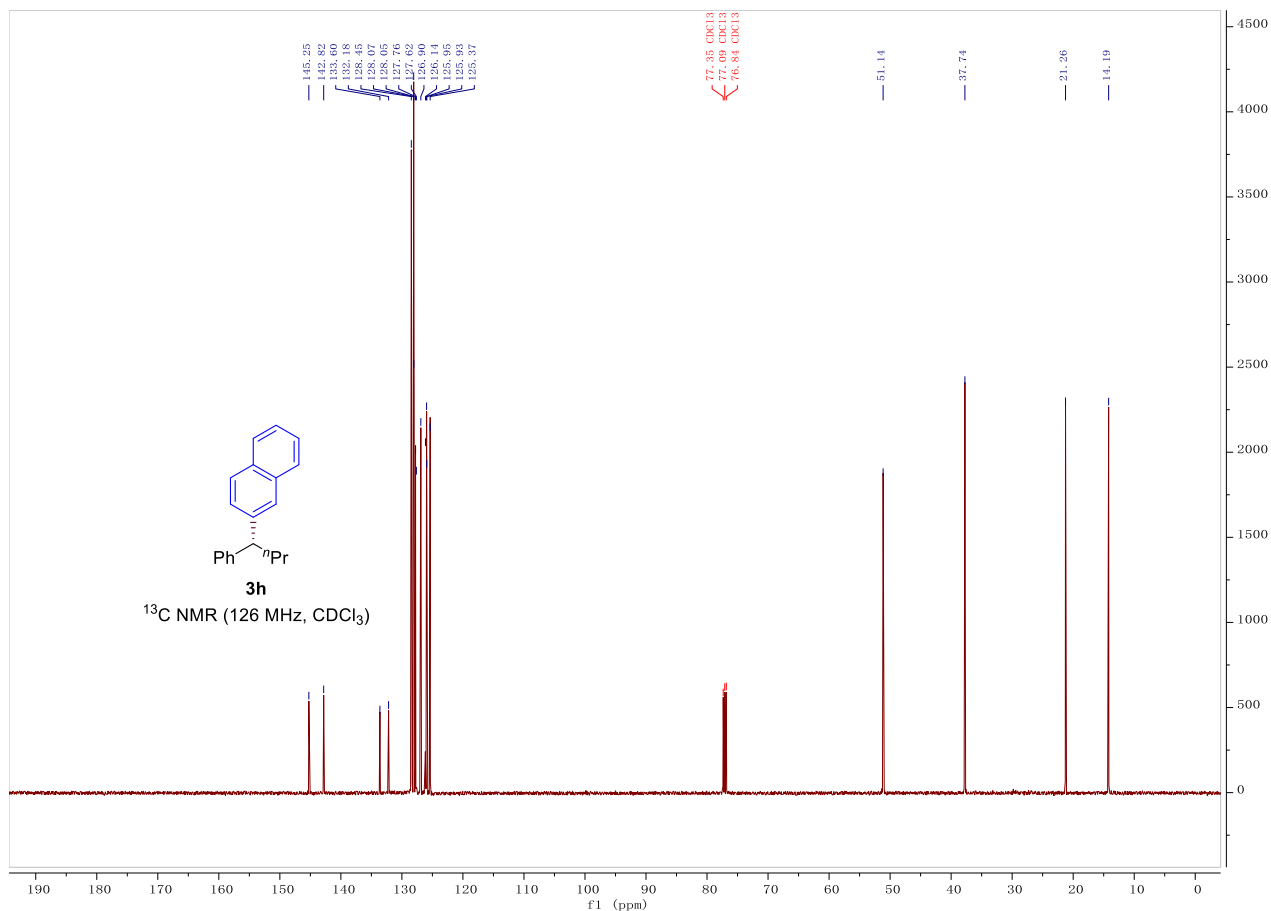

**Supplementary Fig. 23.** <sup>13</sup>C NMR of compound **3h**

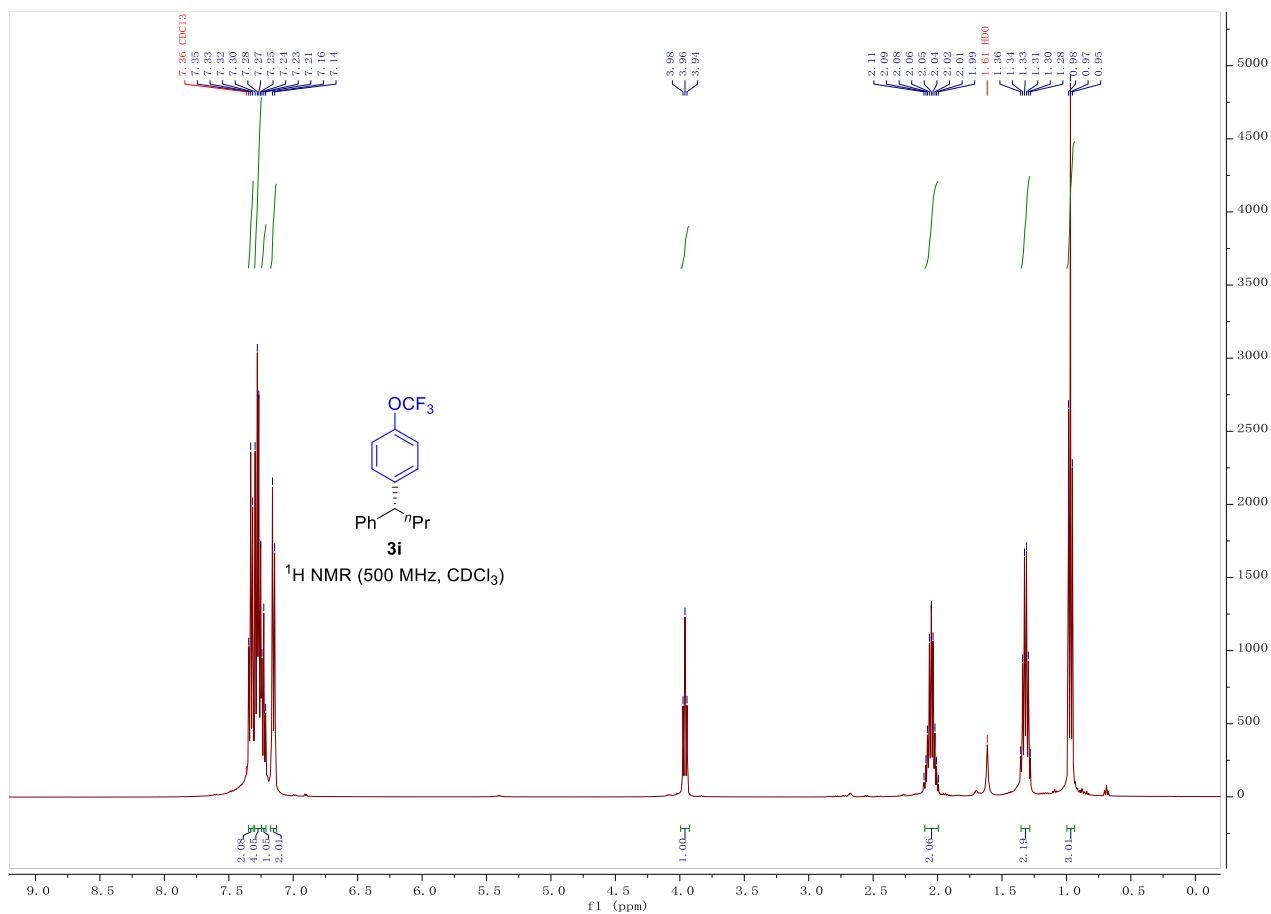

**Supplementary Fig. 24. <sup>1</sup>H NMR of compound **3i****

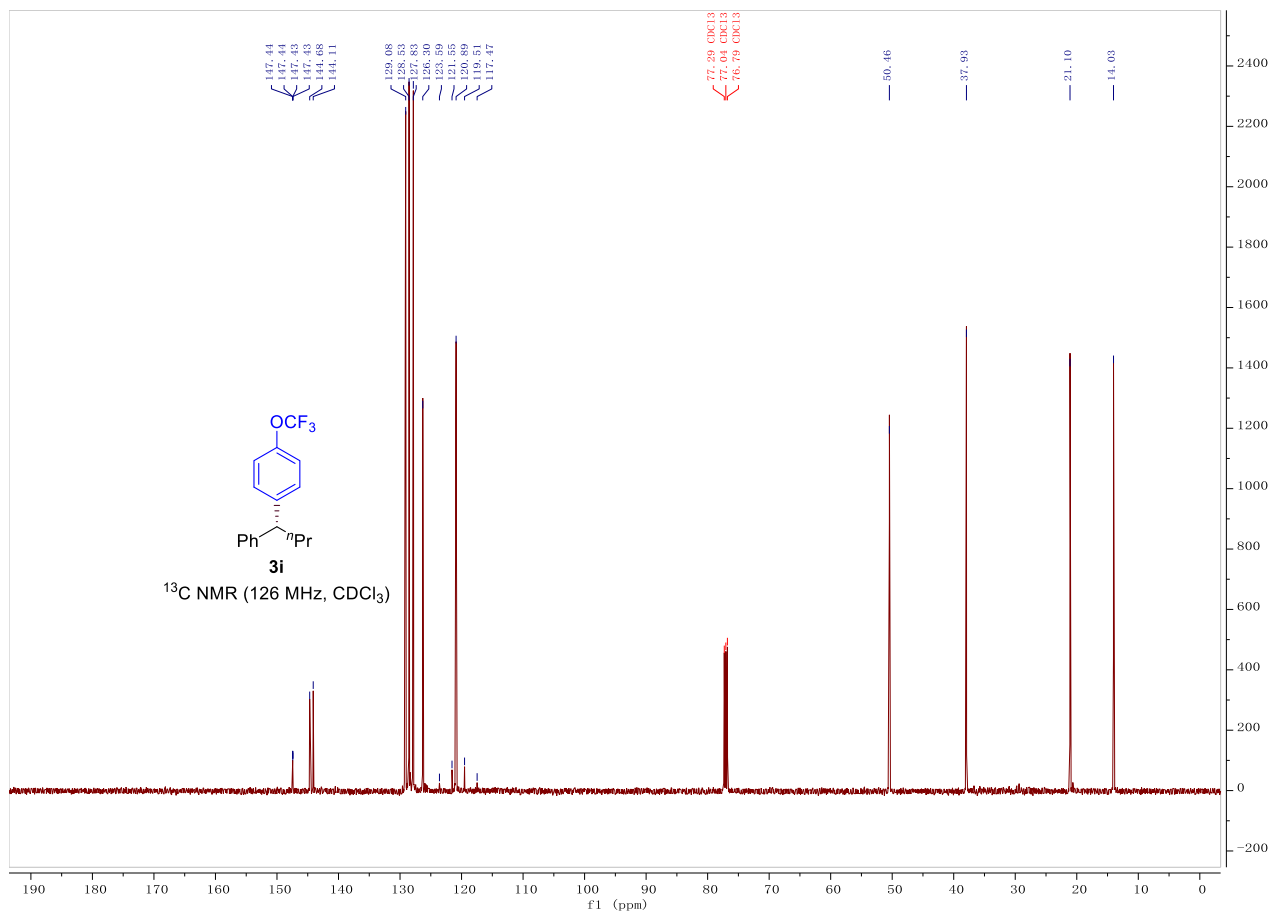

**Supplementary Fig. 25. <sup>13</sup>C NMR of compound **3i****

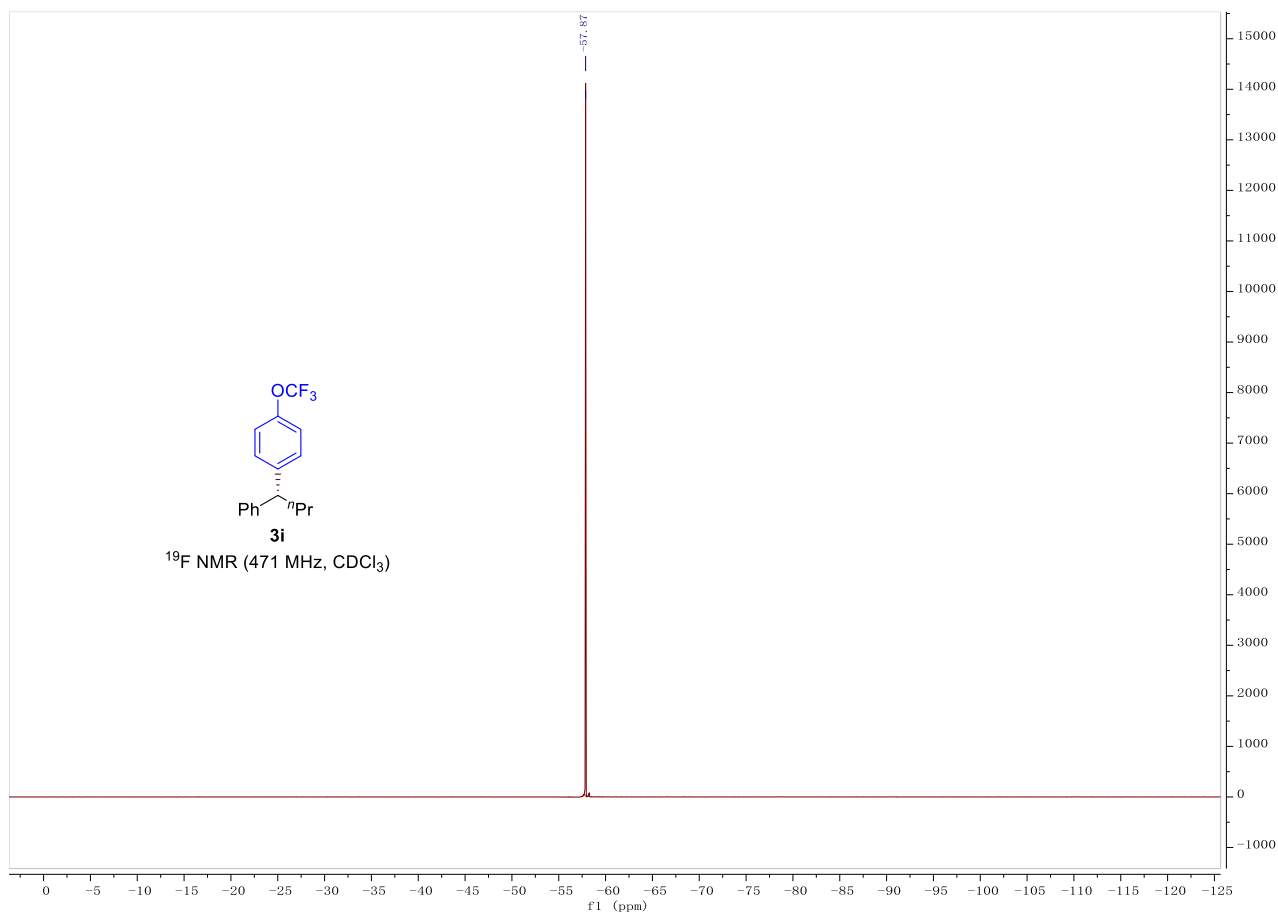

Supplementary Fig. 26. <sup>19</sup>F NMR of compound **3i**

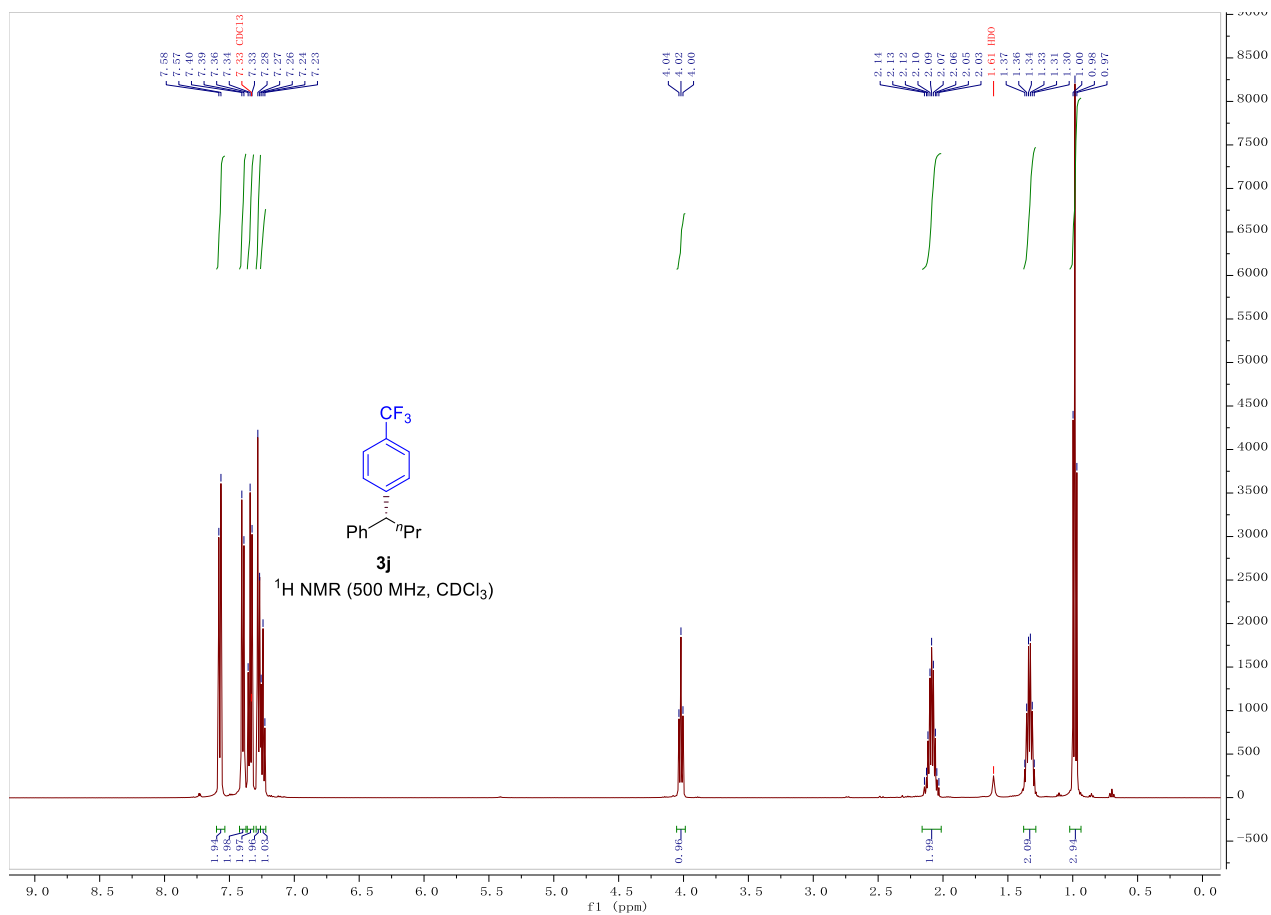

Supplementary Fig. 27. <sup>1</sup>H NMR of compound **3j**



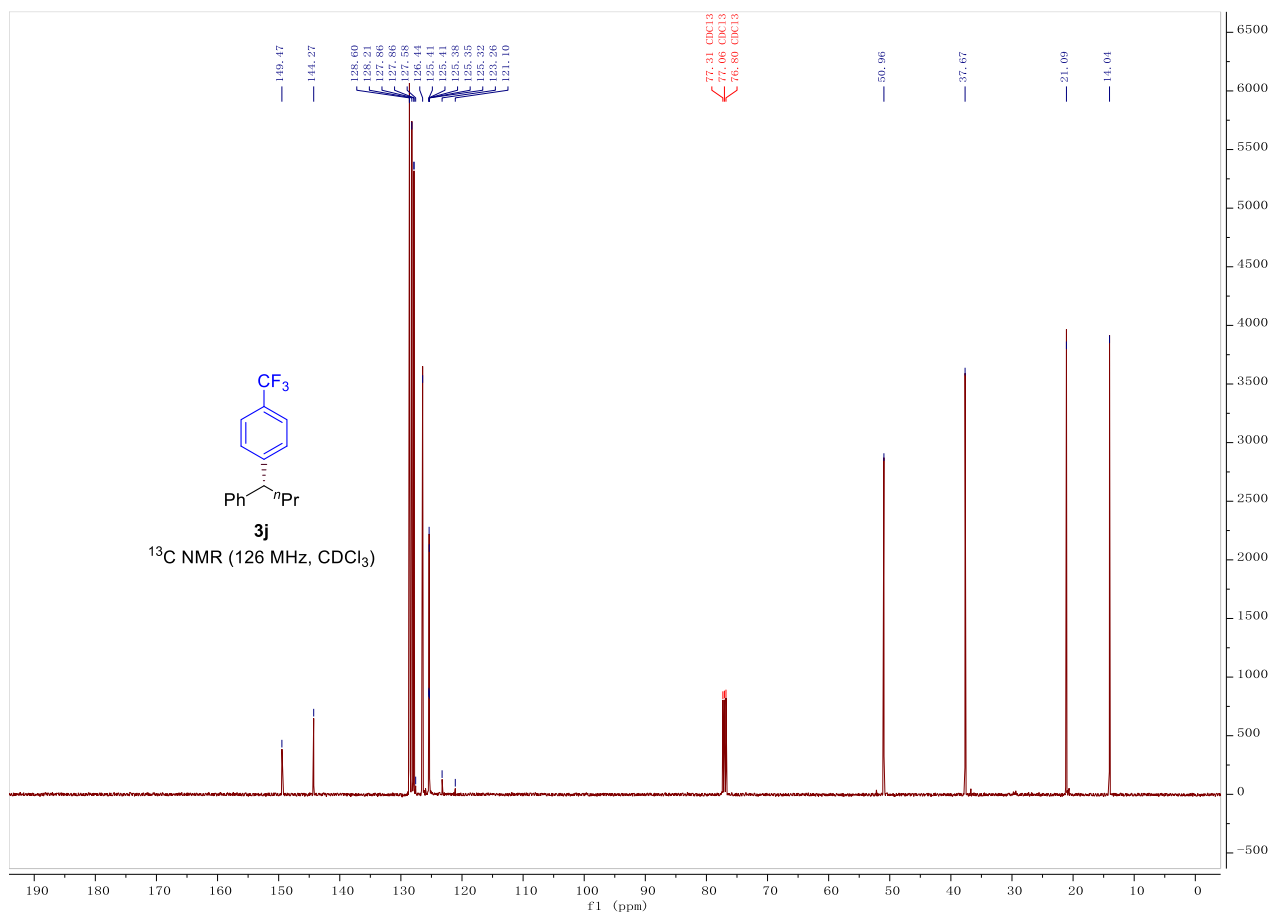

**Supplementary Fig. 28.**  $^{13}\text{C}$  NMR of compound **3j**

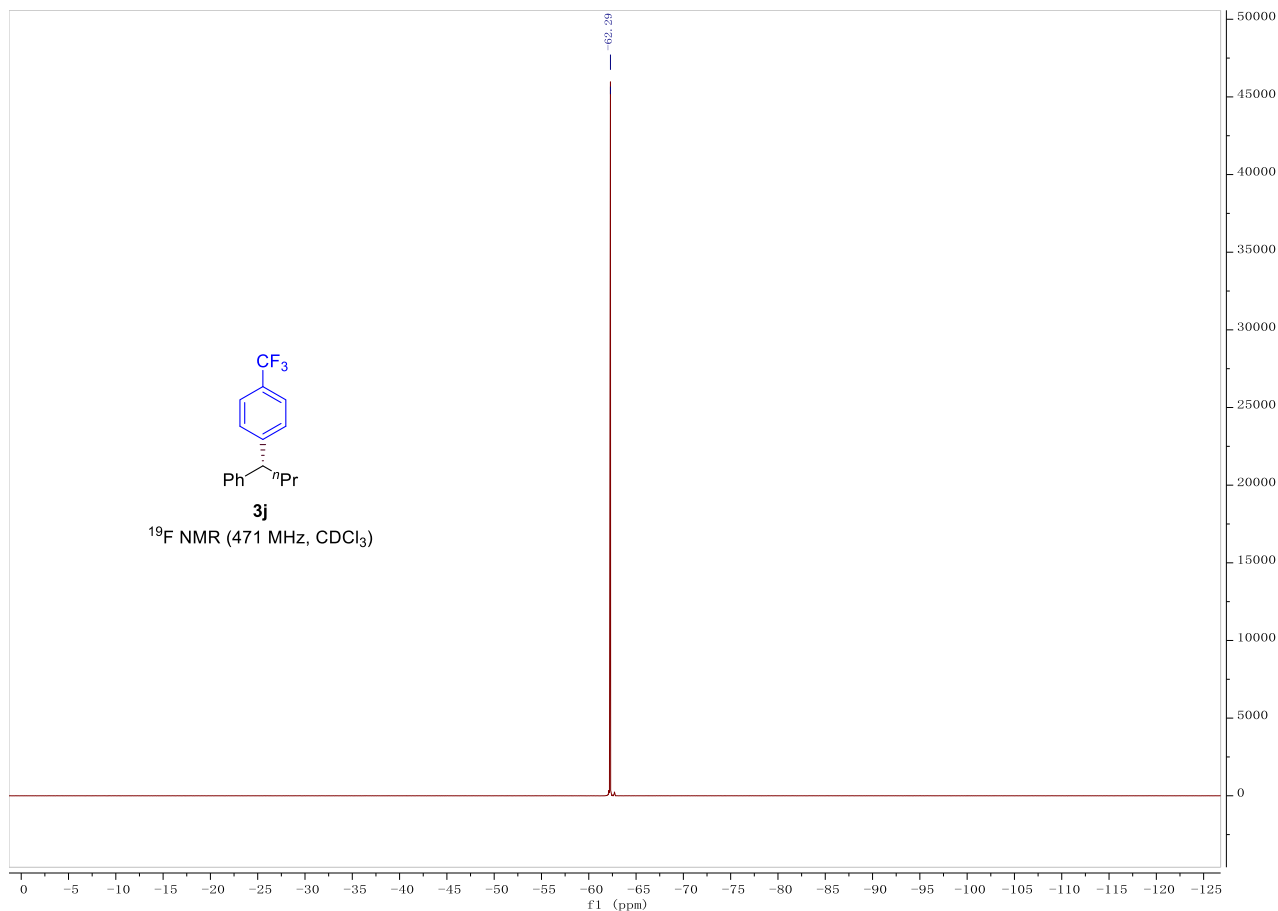

**Supplementary Fig. 29.**  $^{19}\text{F}$  NMR of compound **3j**

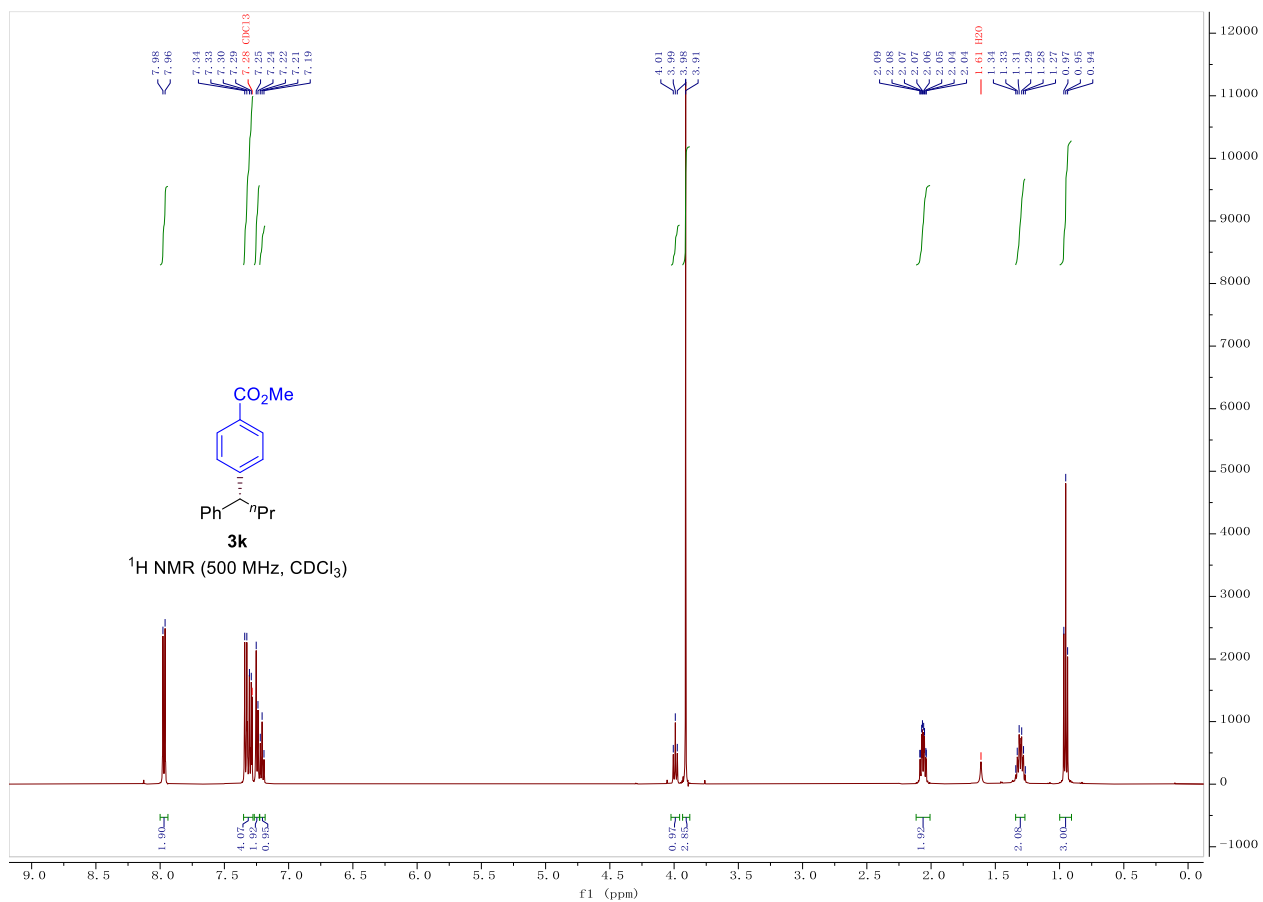

Supplementary Fig. 30. <sup>1</sup>H NMR of compound **3k**

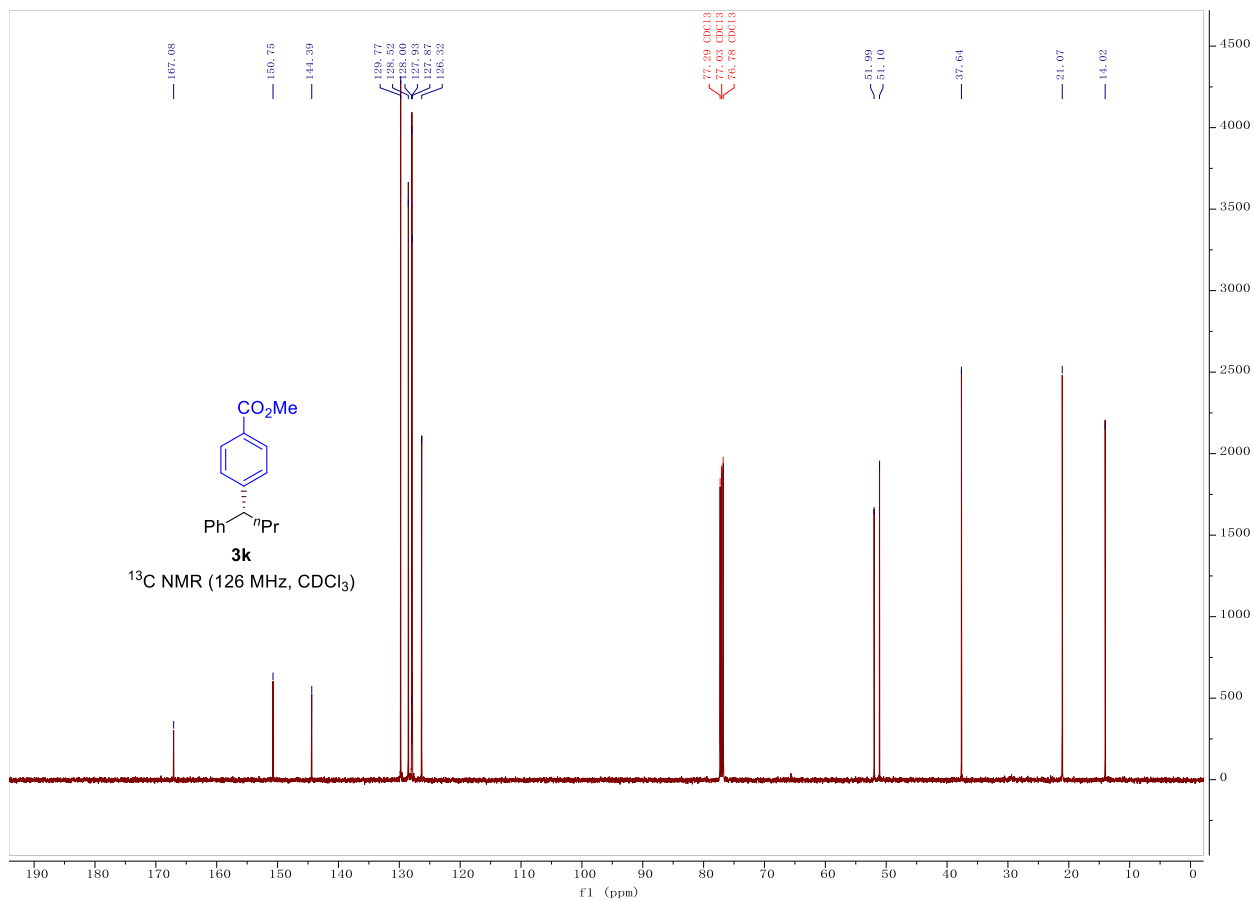

Supplementary Fig. 31. <sup>13</sup>C NMR of compound **3k**



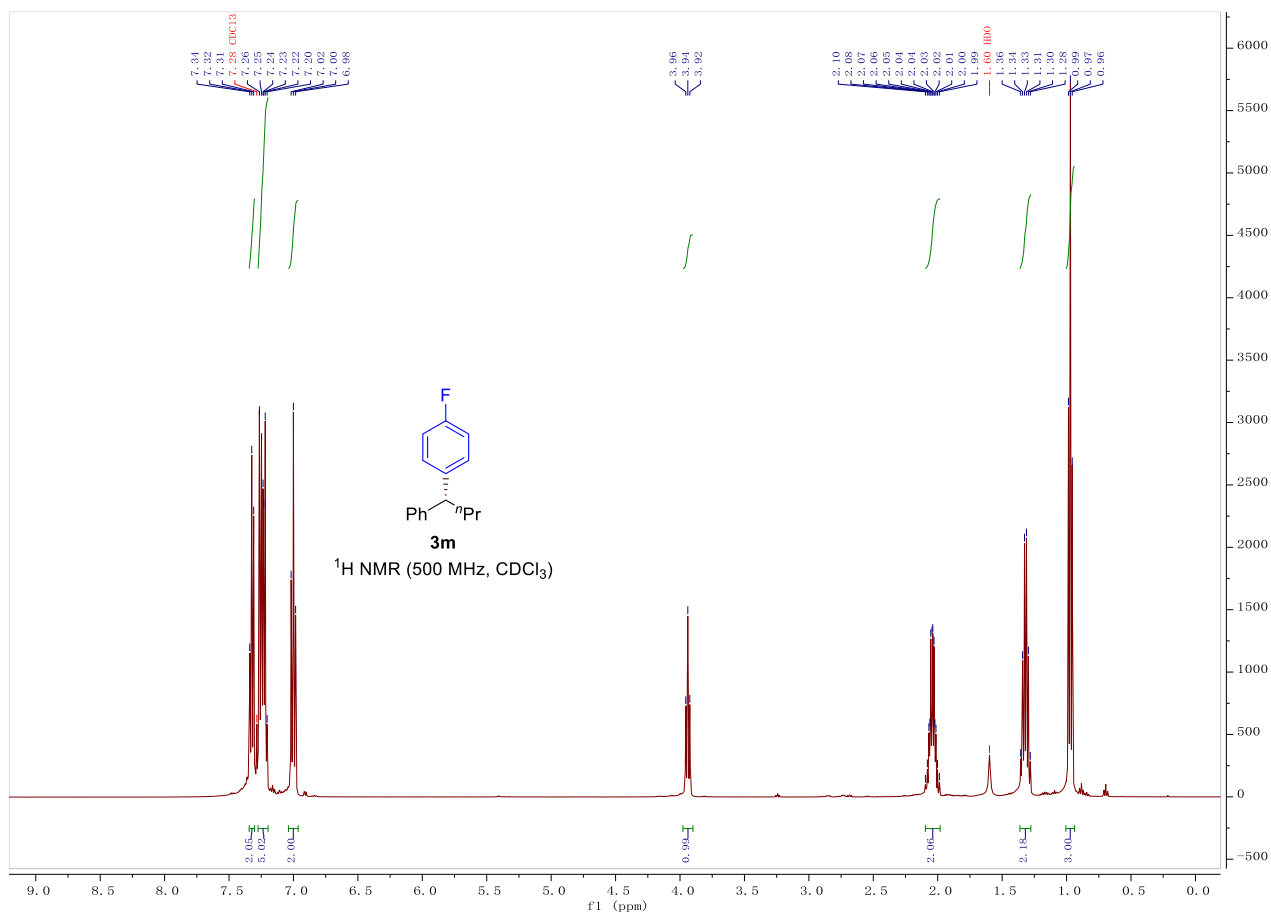

Supplementary Fig. 34. <sup>1</sup>H NMR of compound 3m

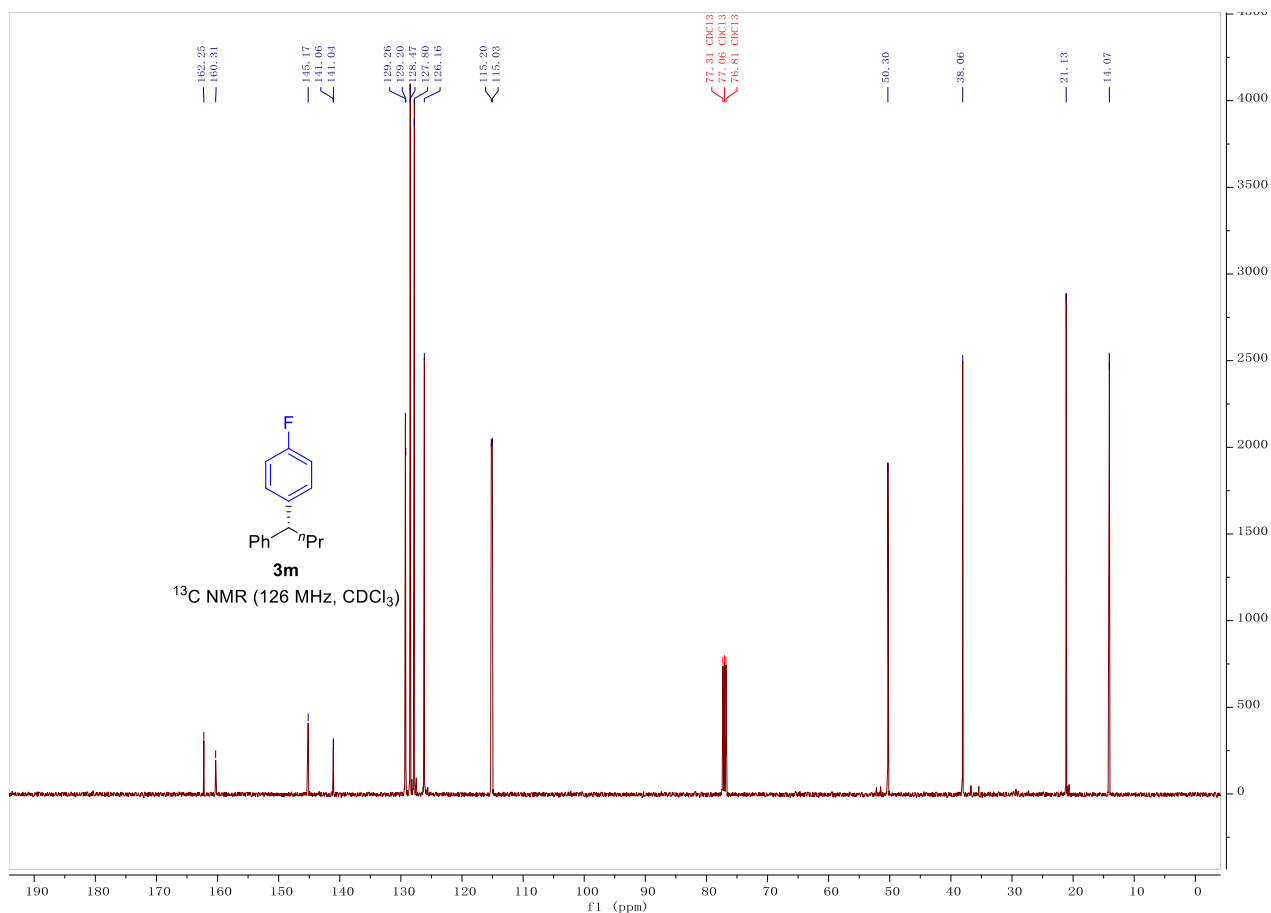

Supplementary Fig. 35. <sup>13</sup>C NMR of compound 3m

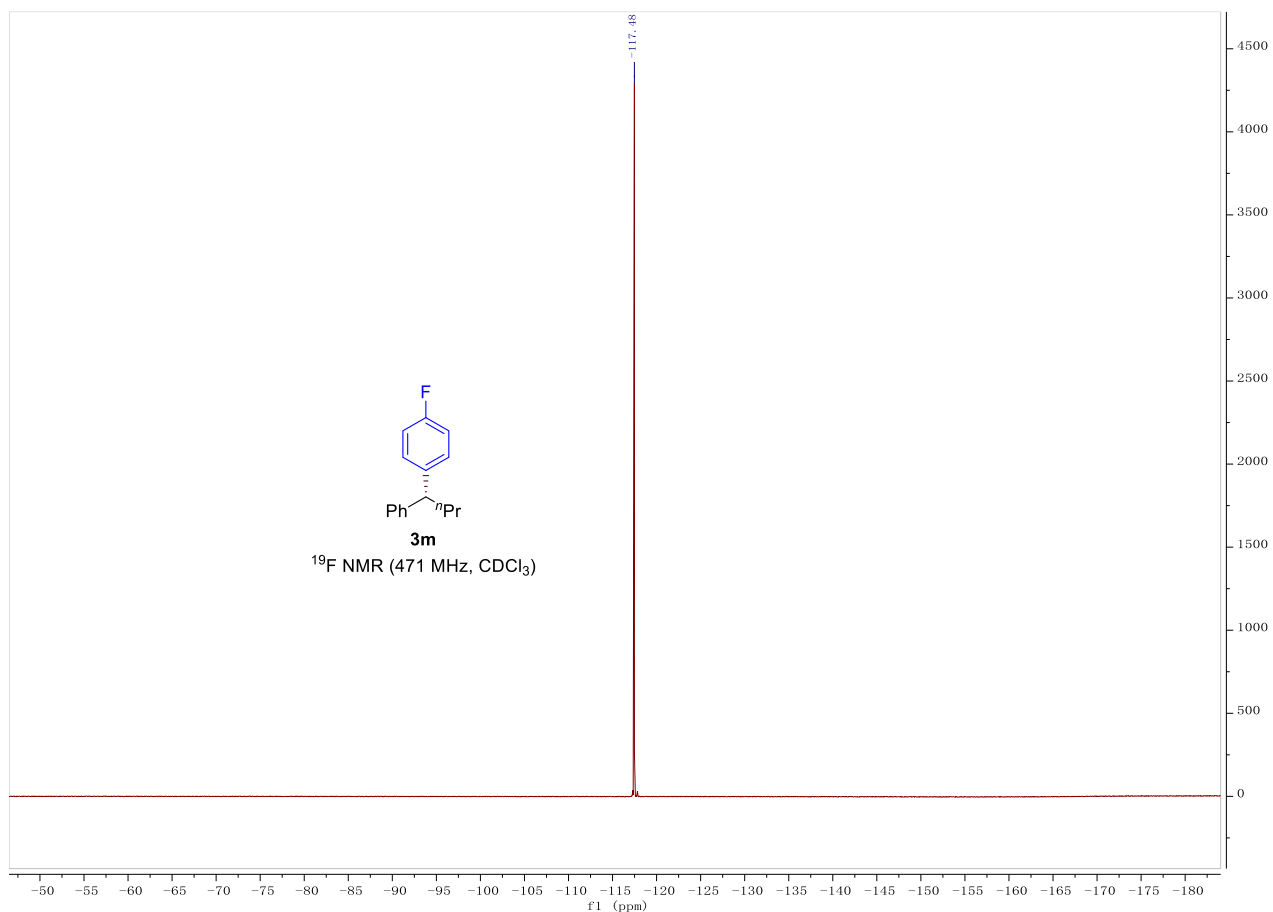

Supplementary Fig. 36. <sup>19</sup>F NMR of compound **3m**

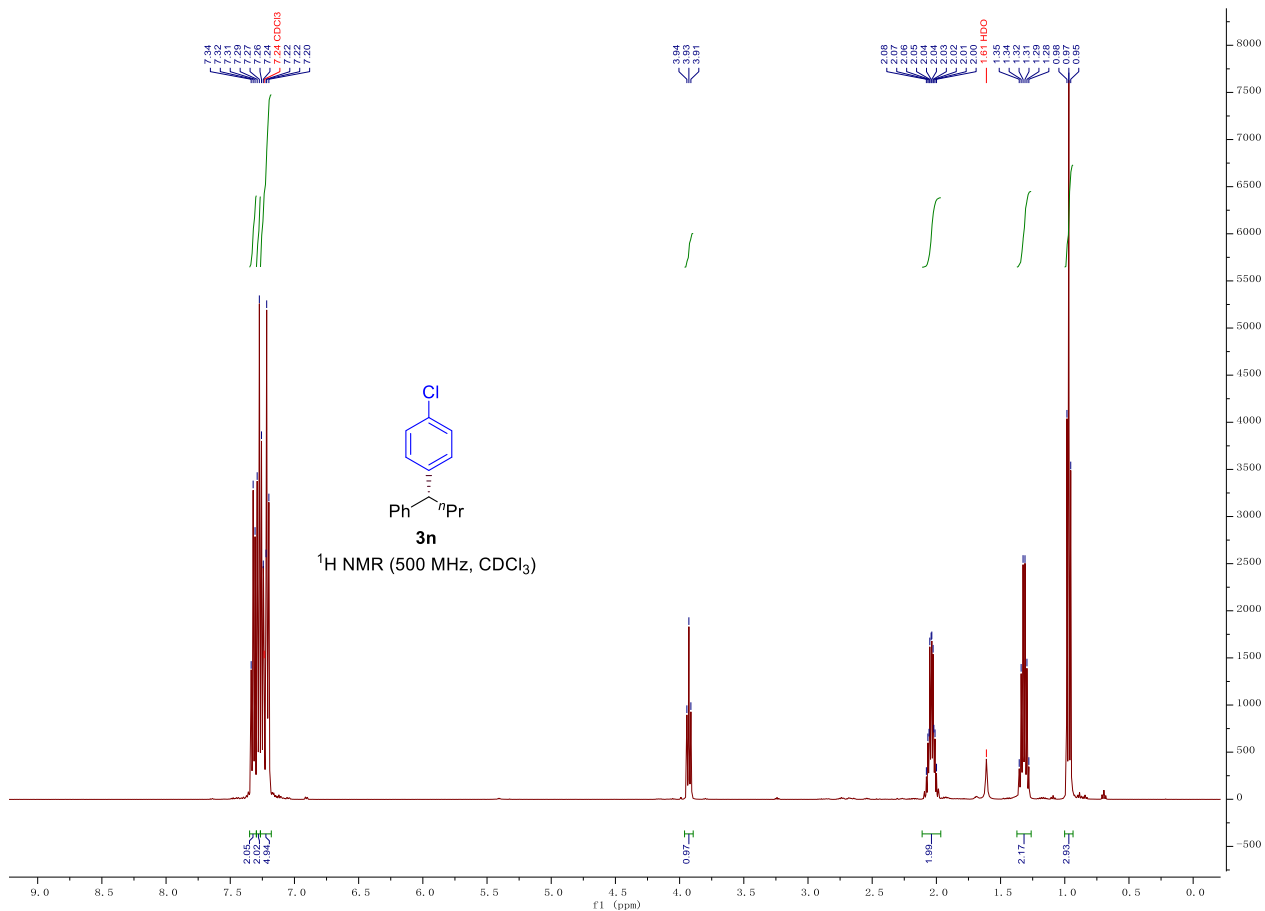

Supplementary Fig. 37. <sup>1</sup>H NMR of compound **3n**

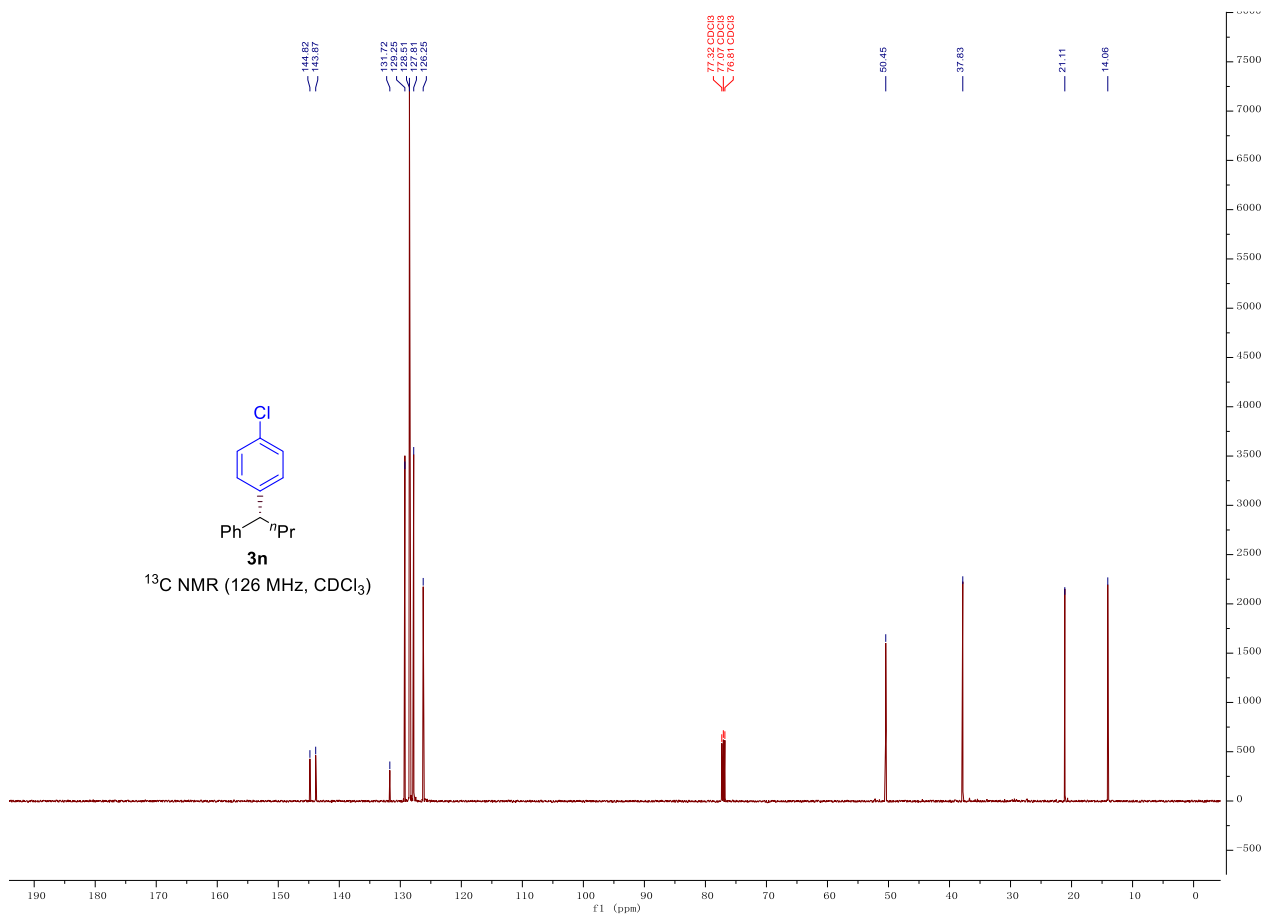

Supplementary Fig. 38.  $^{13}\text{C}$  NMR of compound **3n**

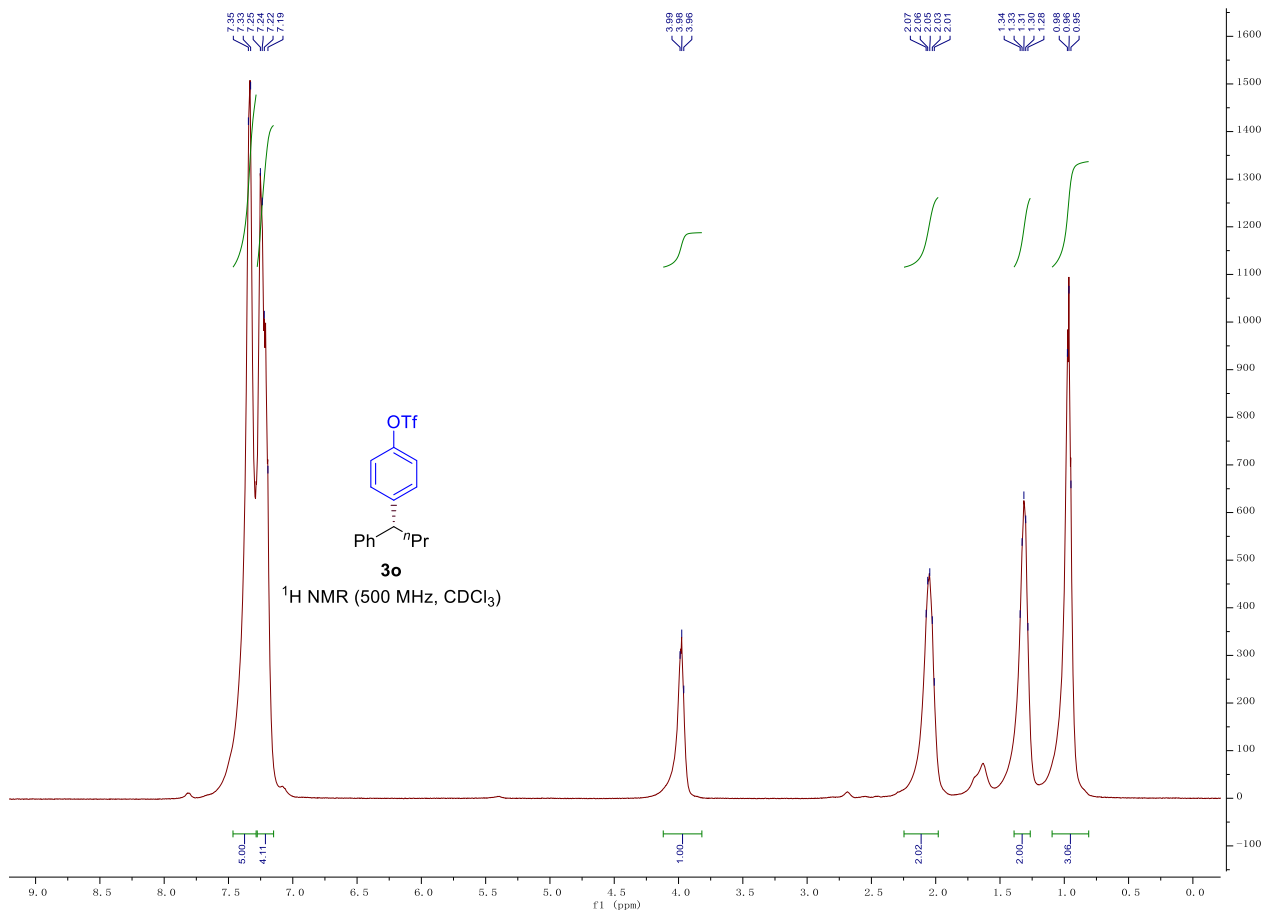

Supplementary Fig. 39.  $^1\text{H}$  NMR of compound **3o**

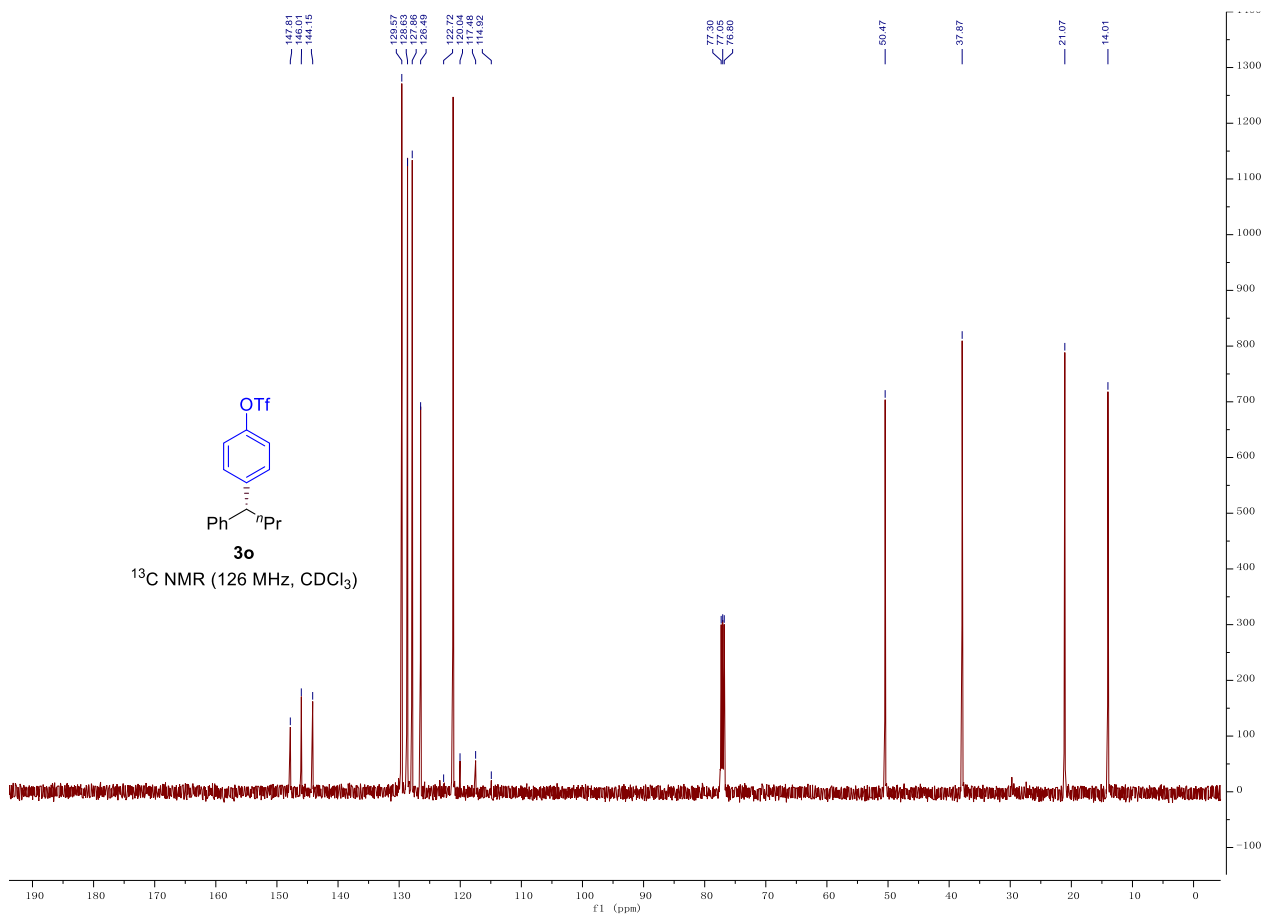

Supplementary Fig. 40. <sup>13</sup>C NMR of compound **3o**

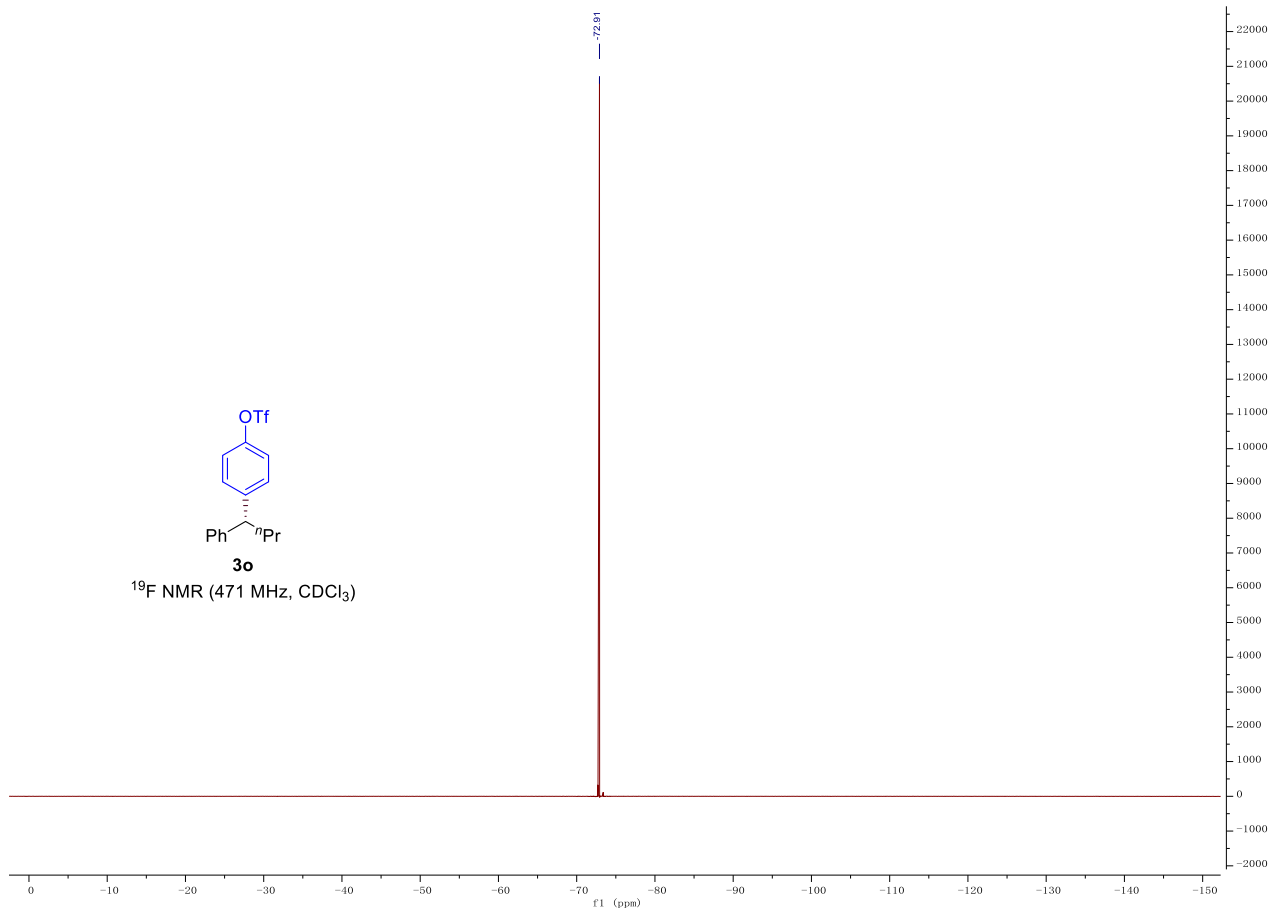

Supplementary Fig. 41. <sup>19</sup>F NMR of compound **3o**

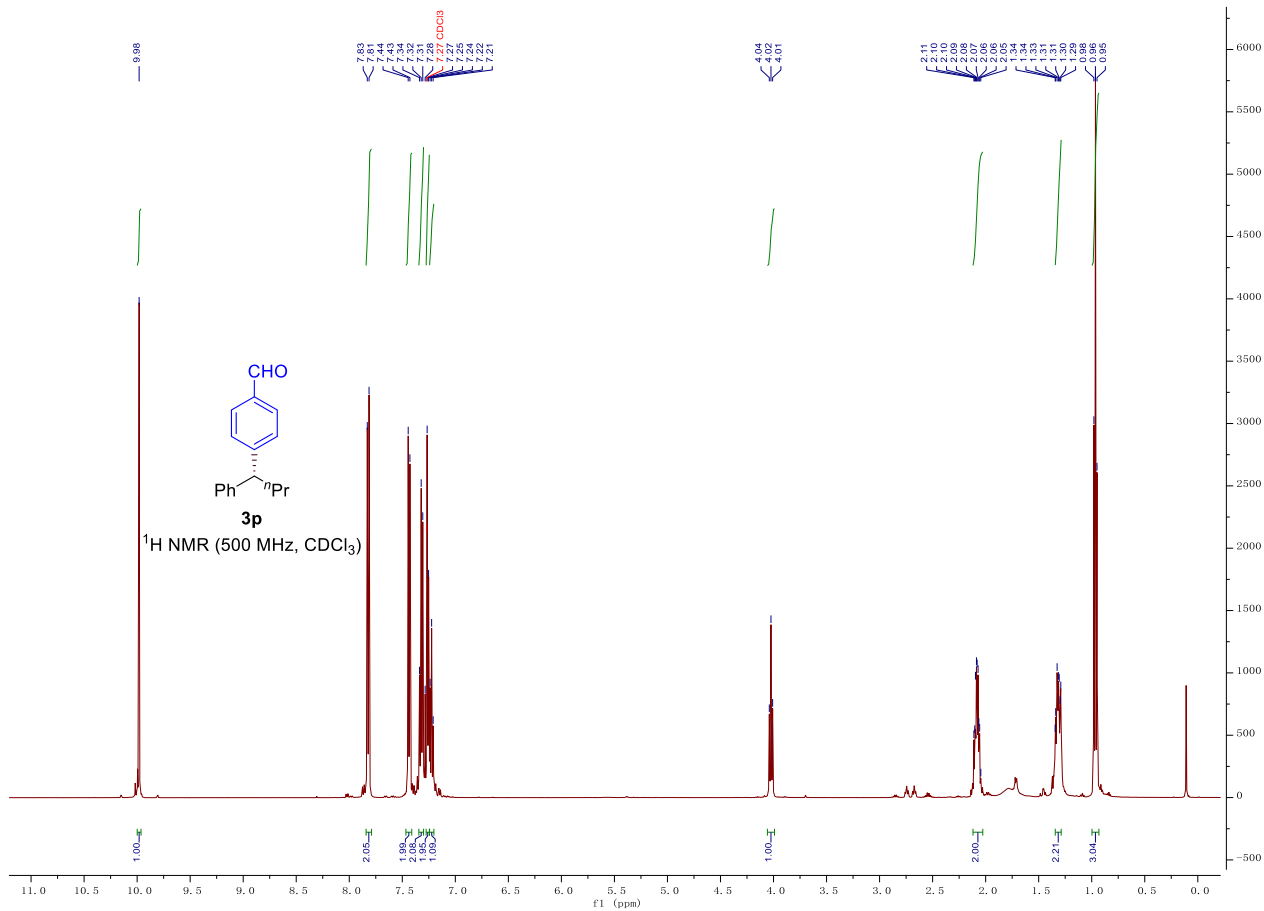

**Supplementary Fig. 42.** <sup>1</sup>H NMR of compound **3p**

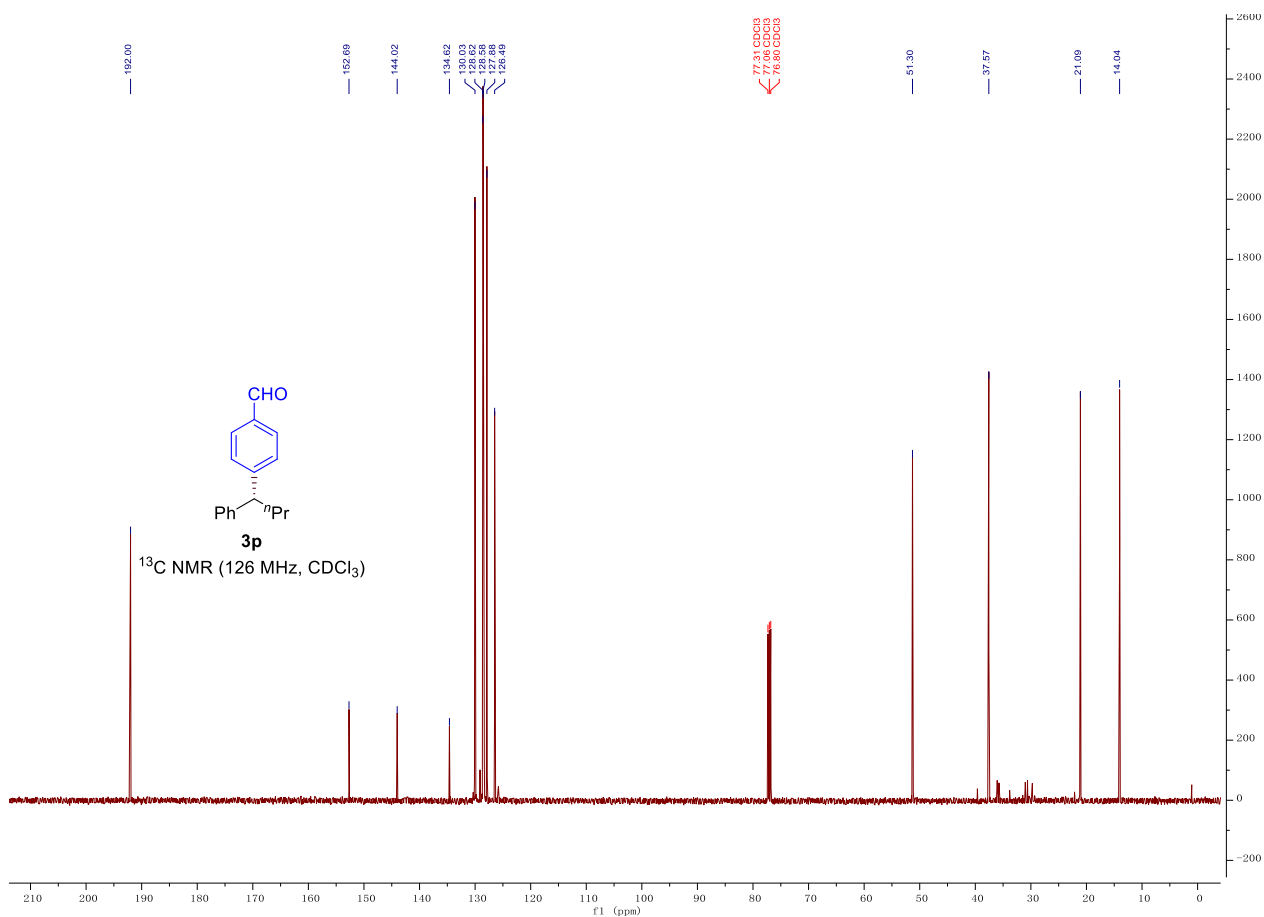

**Supplementary Fig. 43.** <sup>13</sup>C NMR of compound **3p**



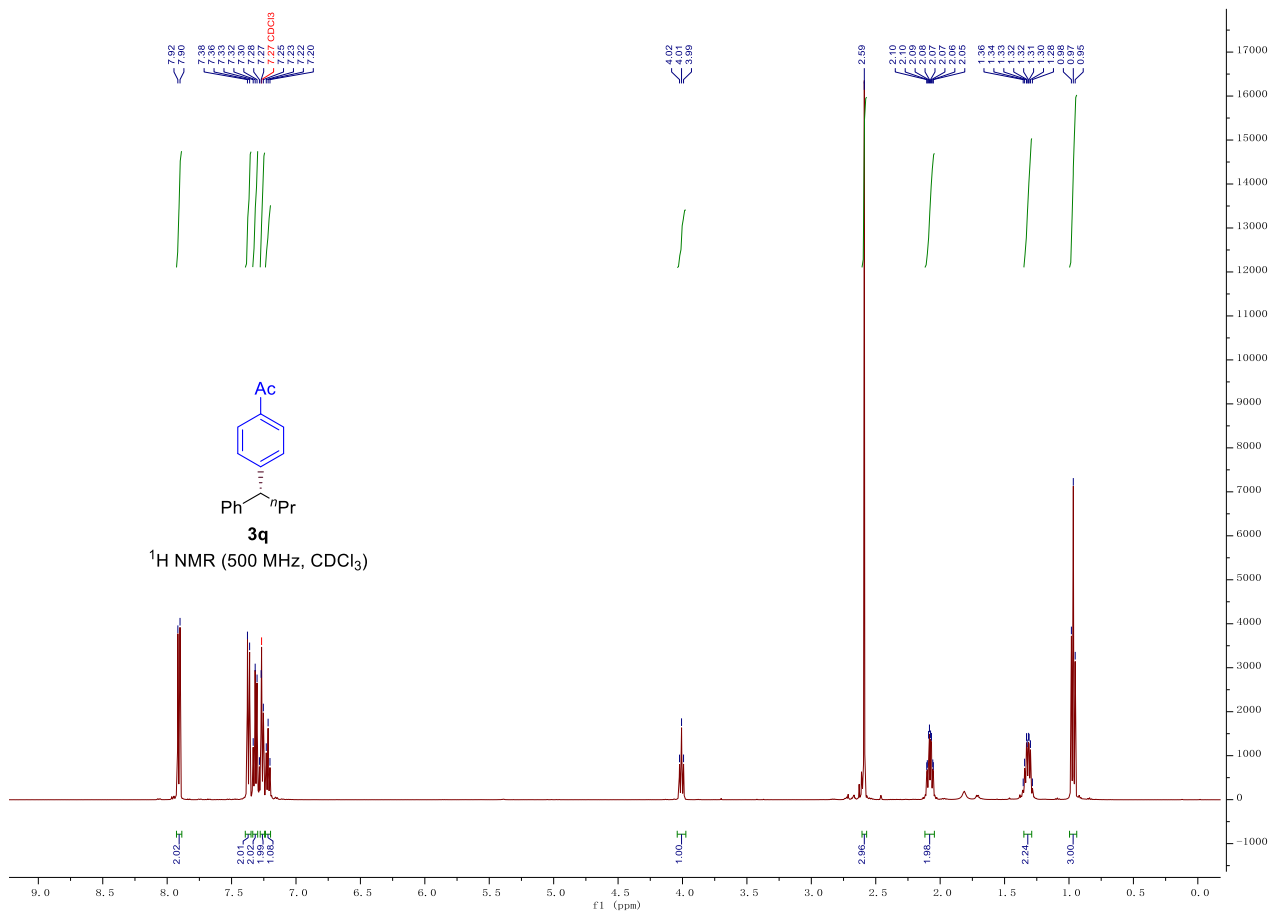

Supplementary Fig. 44. <sup>1</sup>H NMR of compound 3q

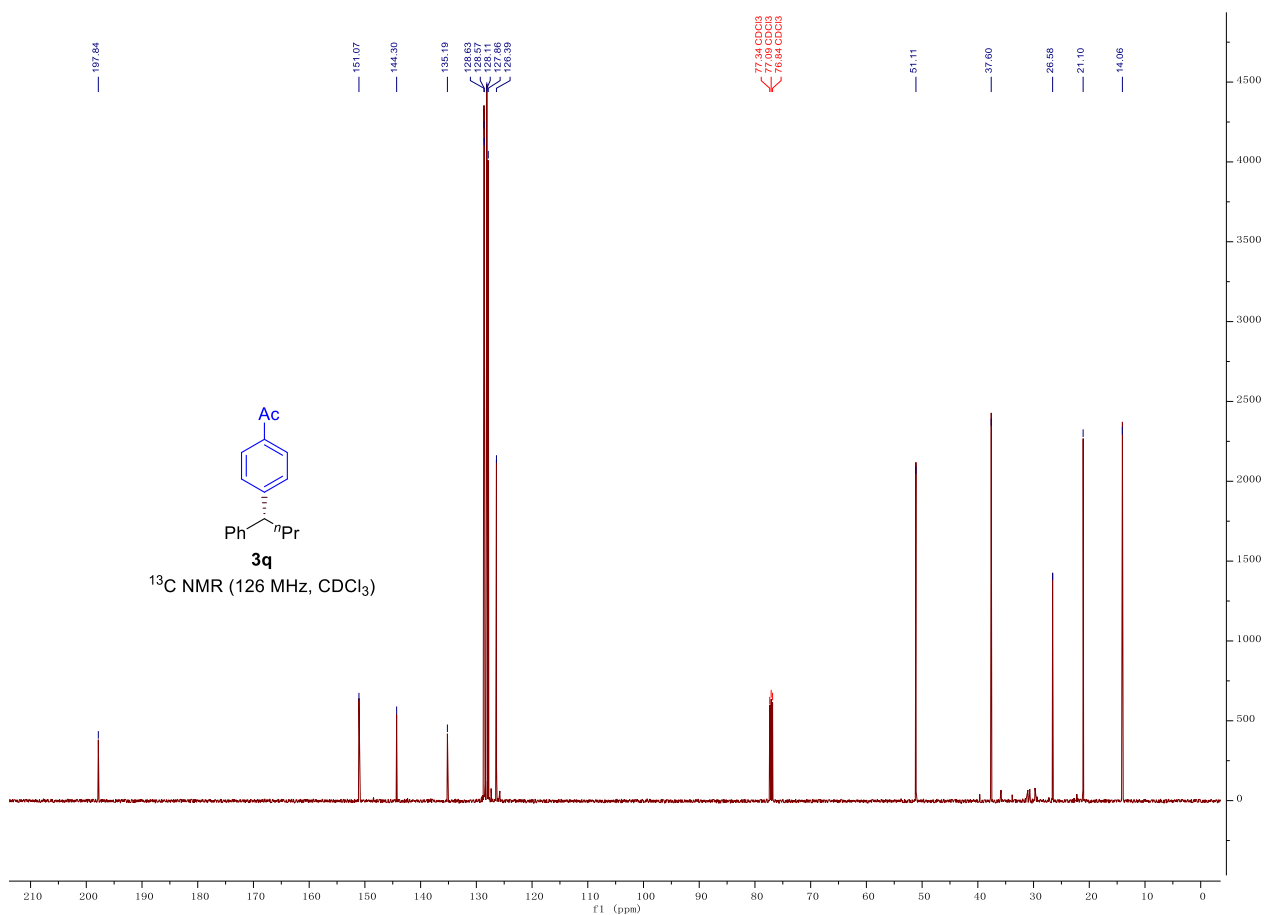

Supplementary Fig. 45. <sup>13</sup>C NMR of compound 3q

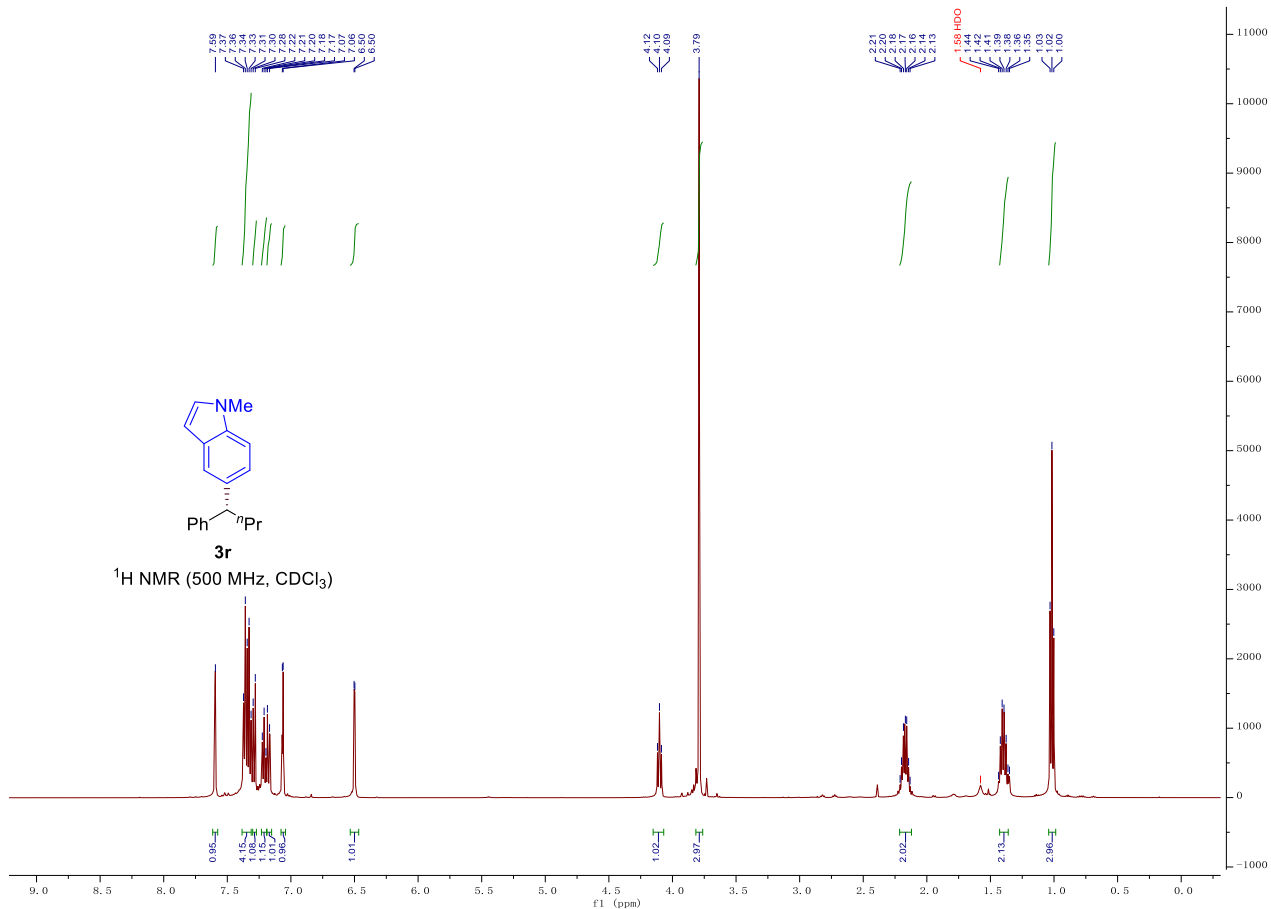

**Supplementary Fig. 46. <sup>1</sup>H NMR of compound 3r**

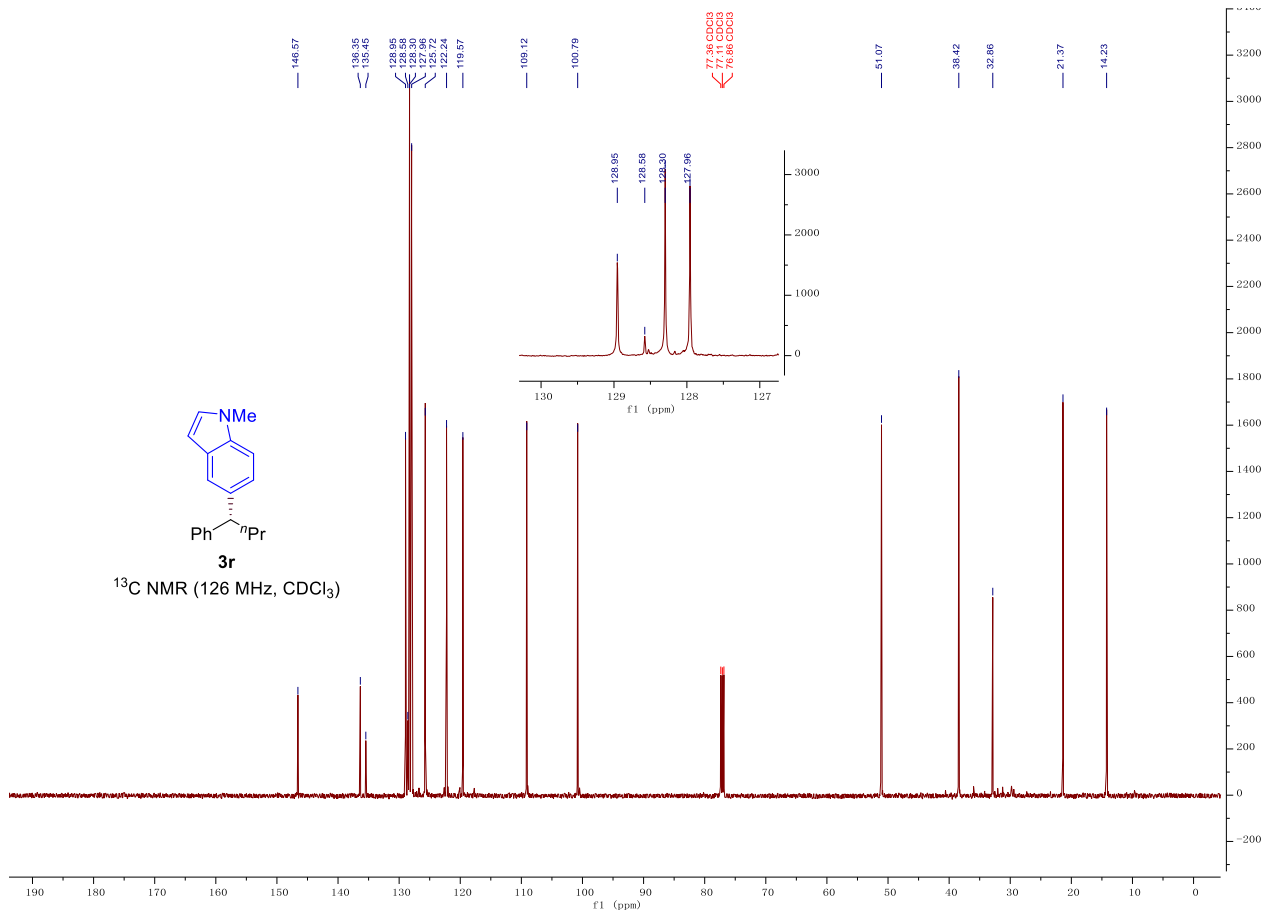

**Supplementary Fig. 47. <sup>13</sup>C NMR of compound 3r**

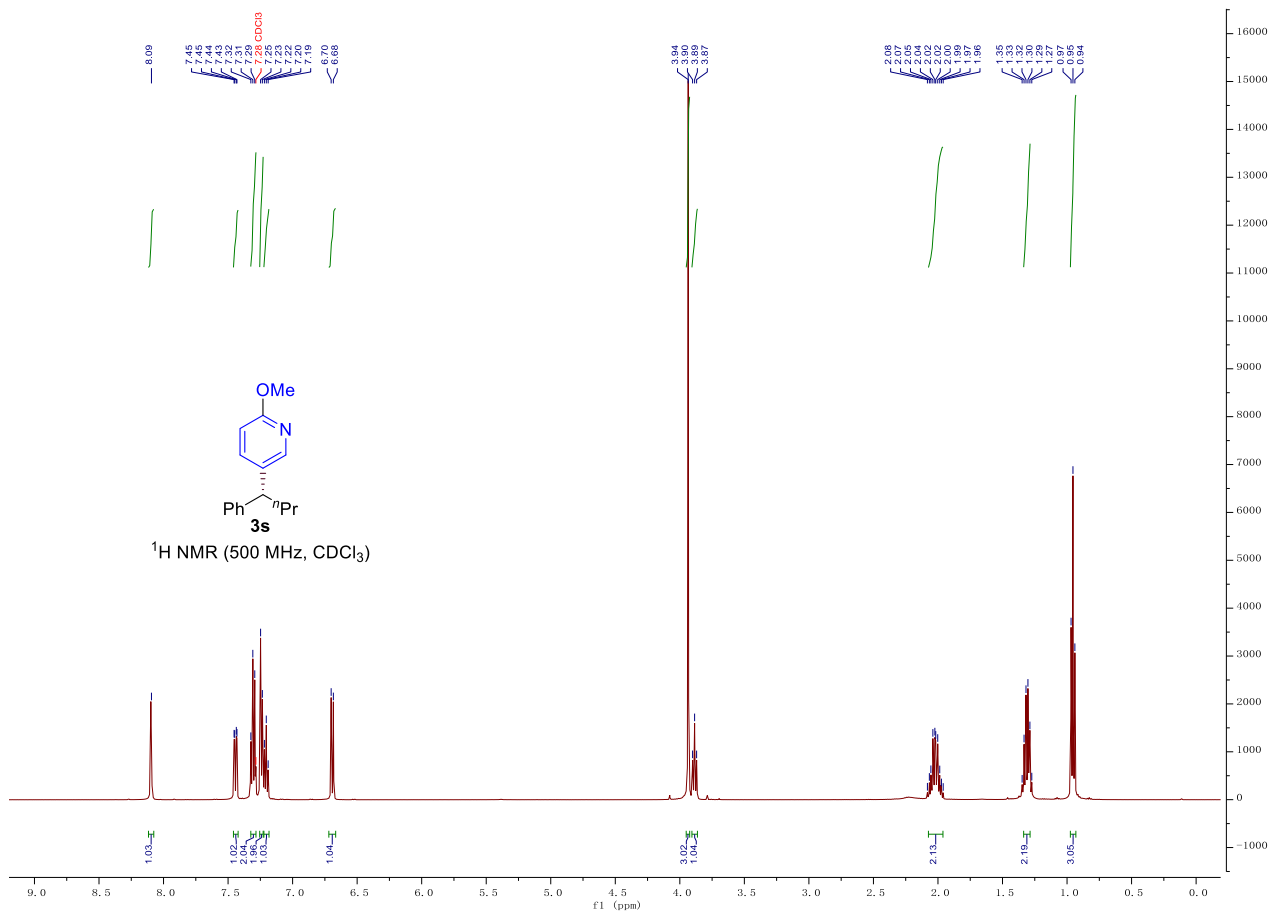

**Supplementary Fig. 48. <sup>1</sup>H NMR of compound 3s**

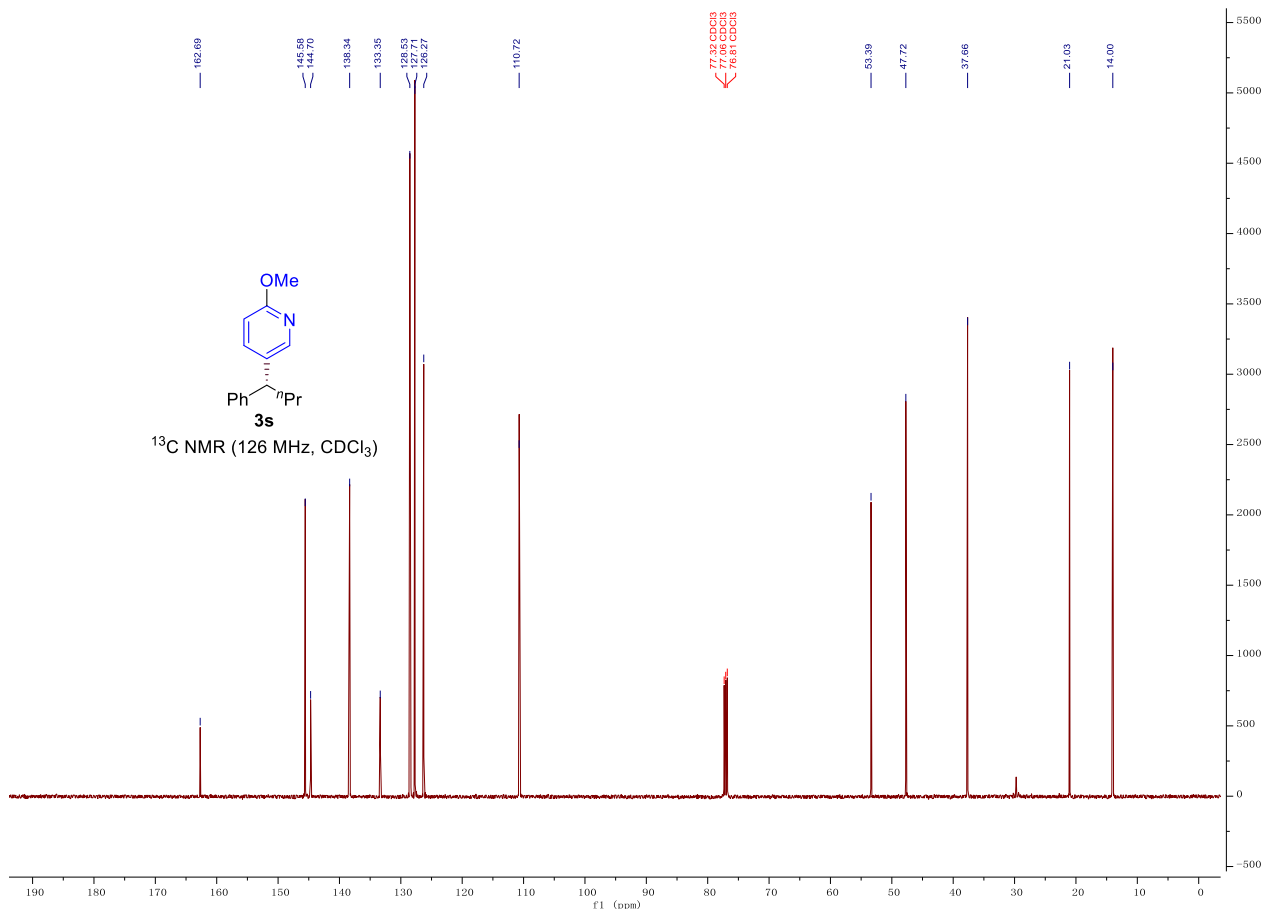

**Supplementary Fig. 49. <sup>13</sup>C NMR of compound 3s**

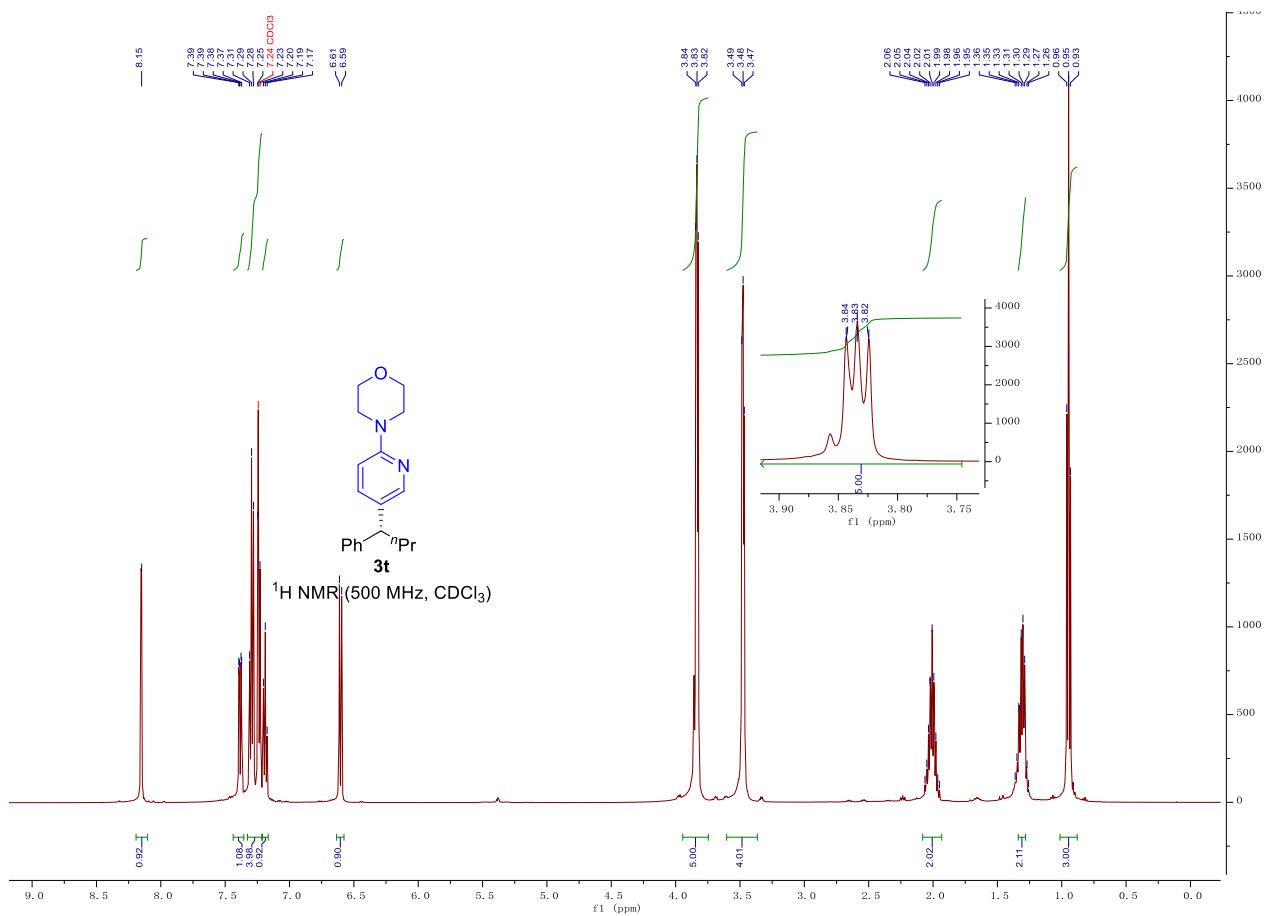

**Supplementary Fig. 50. <sup>1</sup>H NMR of compound 3t**

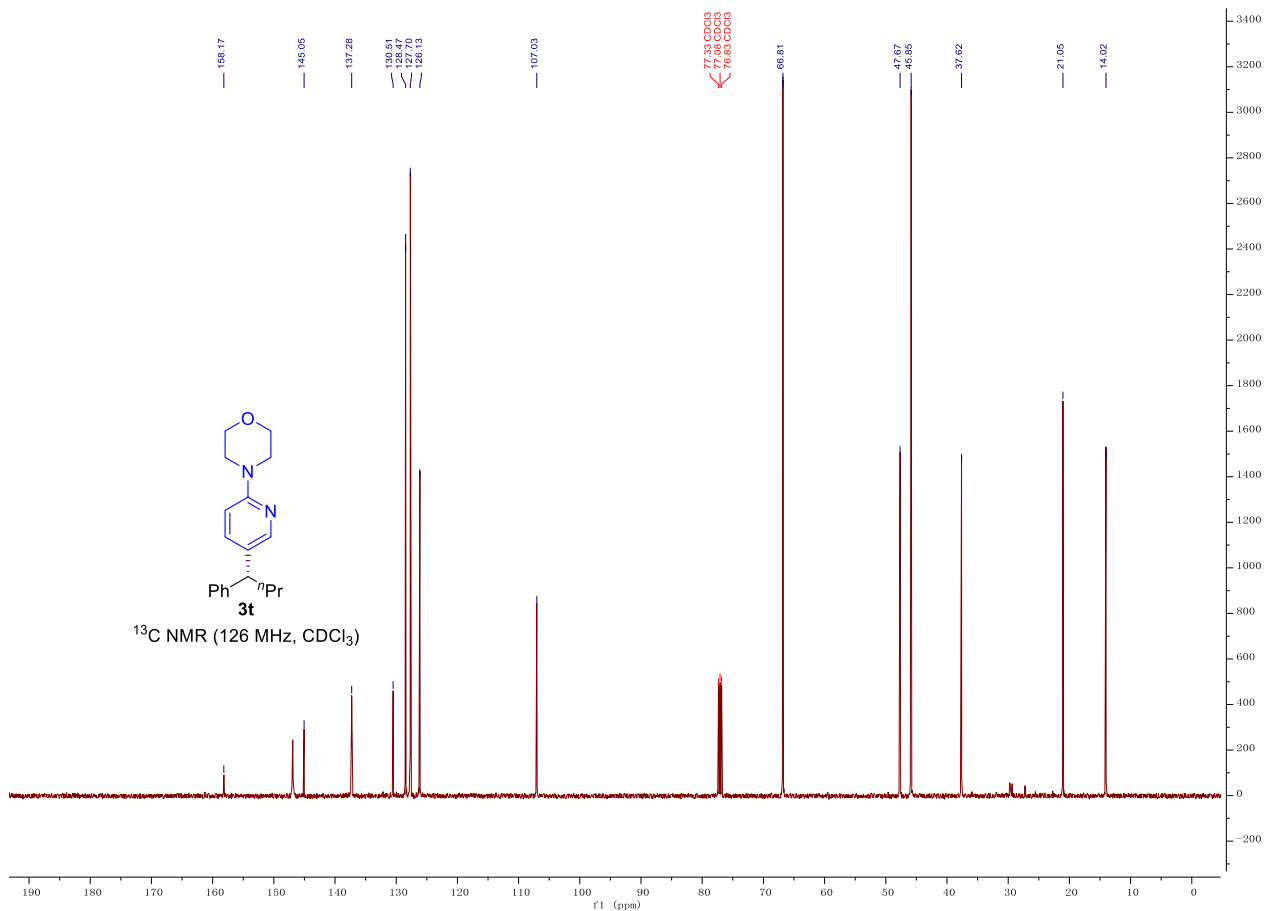

**Supplementary Fig. 51. <sup>13</sup>C NMR of compound 3t**

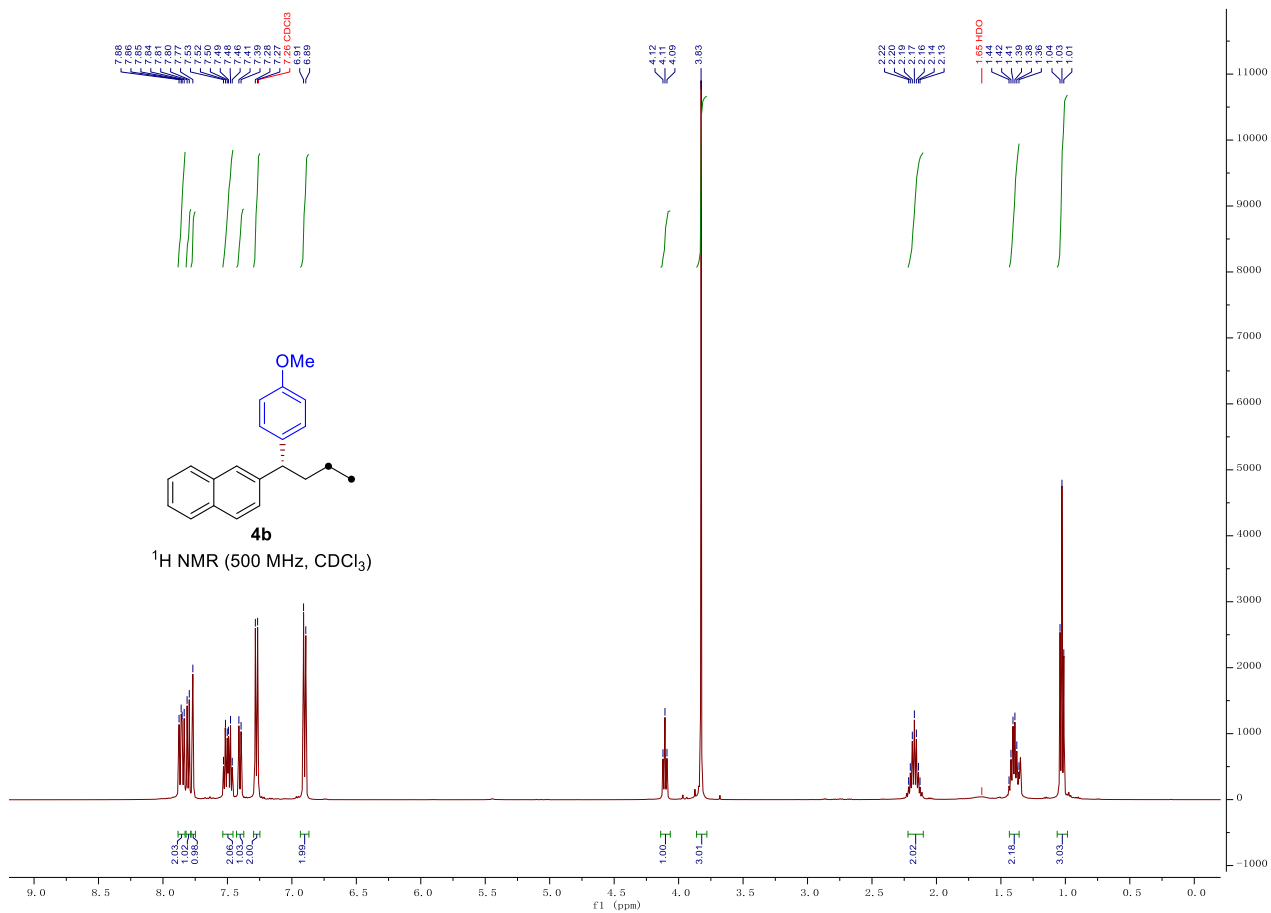

**Supplementary Fig. 52.  $^1\text{H}$  NMR of compound 4b**

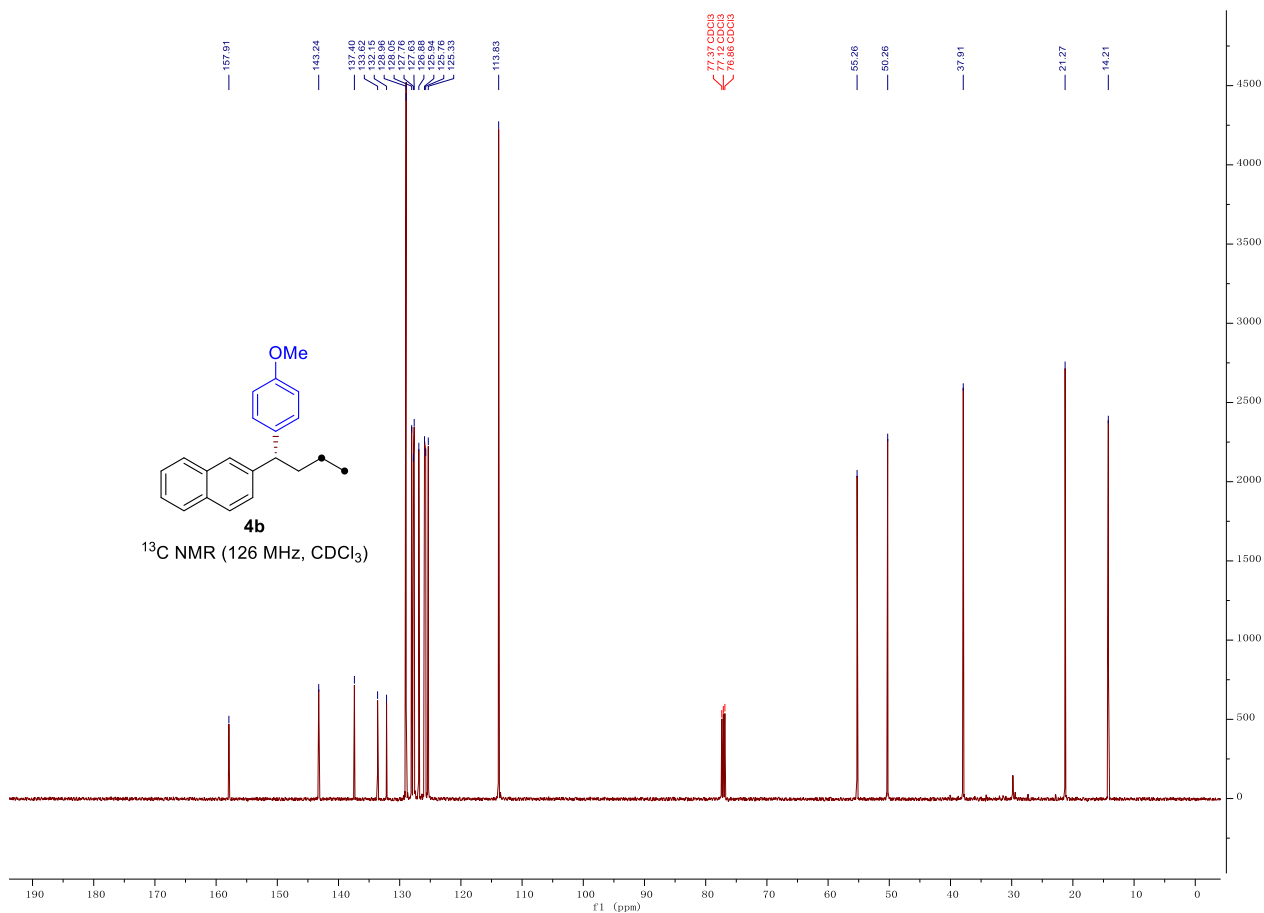

**Supplementary Fig. 53.  $^{13}\text{C}$  NMR of compound 4b**

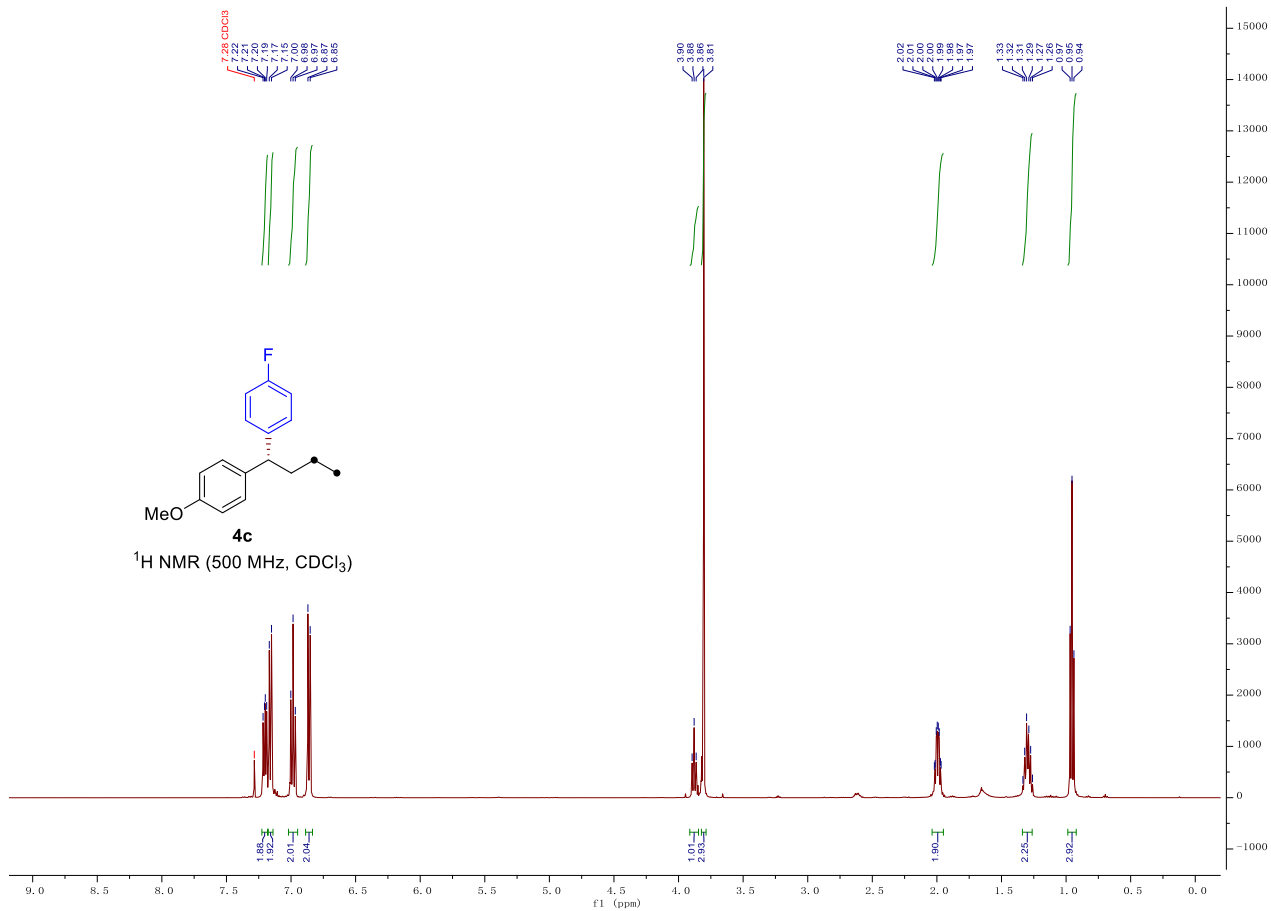

Supplementary Fig. 54. <sup>1</sup>H NMR of compound 4c

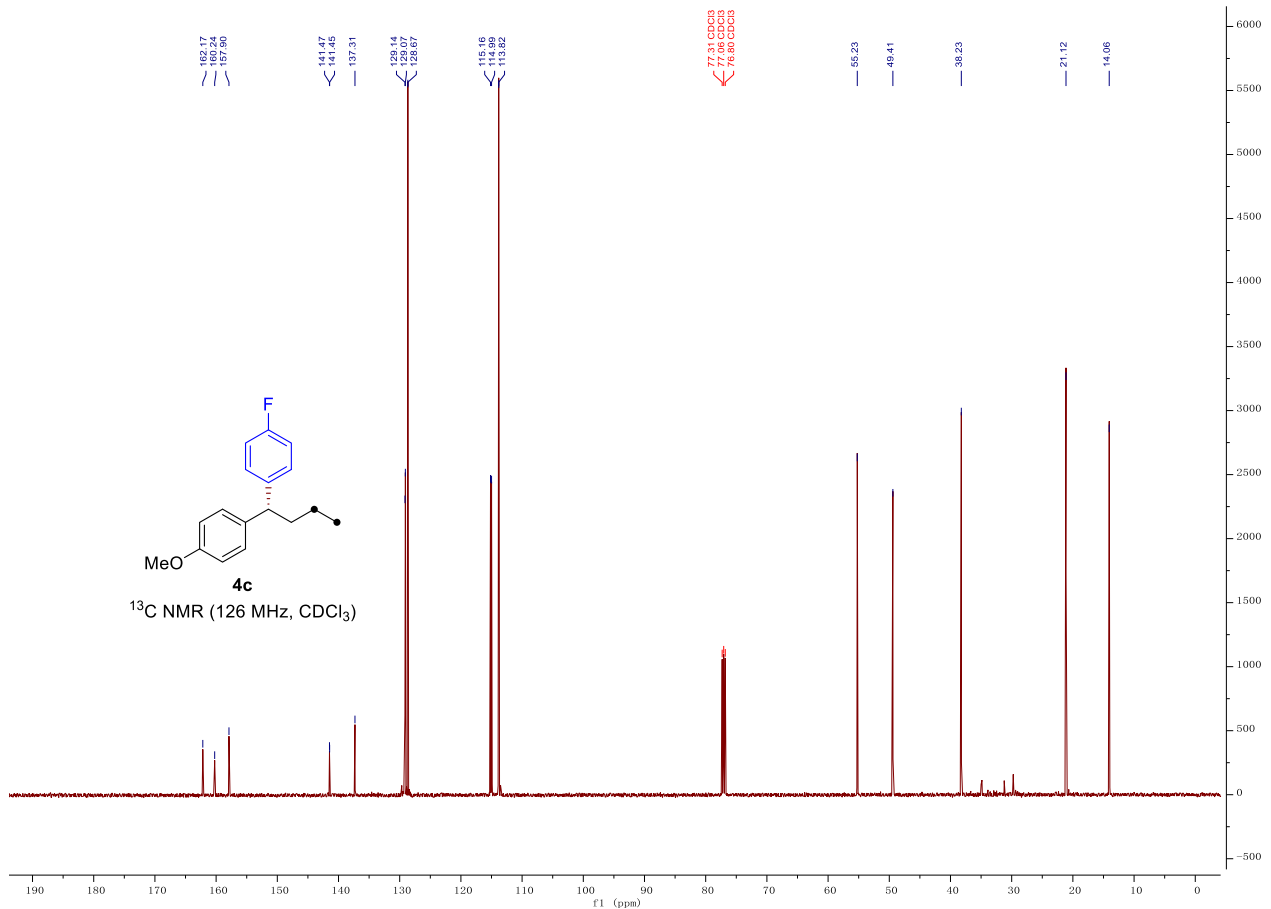

Supplementary Fig. 55. <sup>13</sup>C NMR of compound 4c

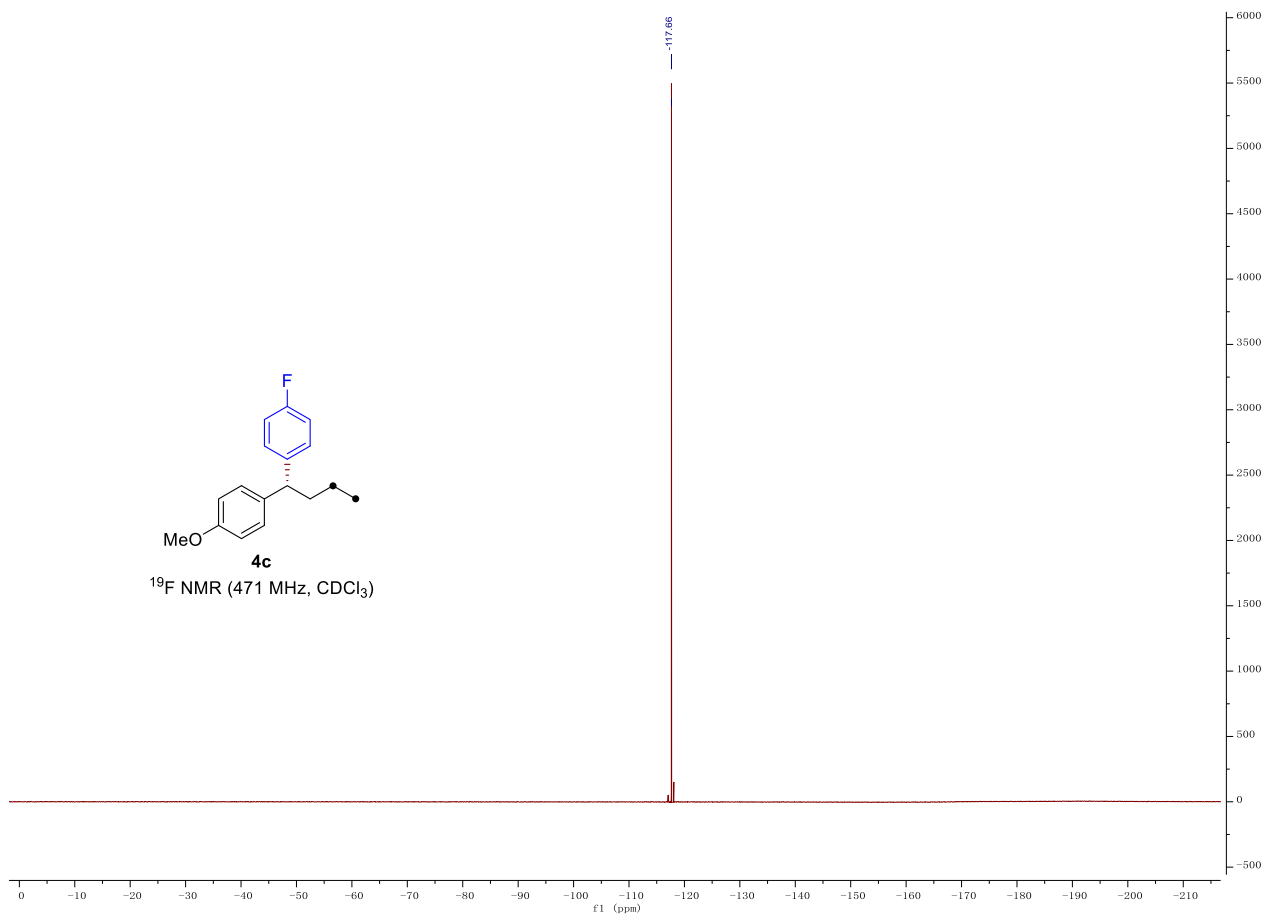

Supplementary Fig. 56.  $^{19}\text{F}$  NMR of compound **4c**

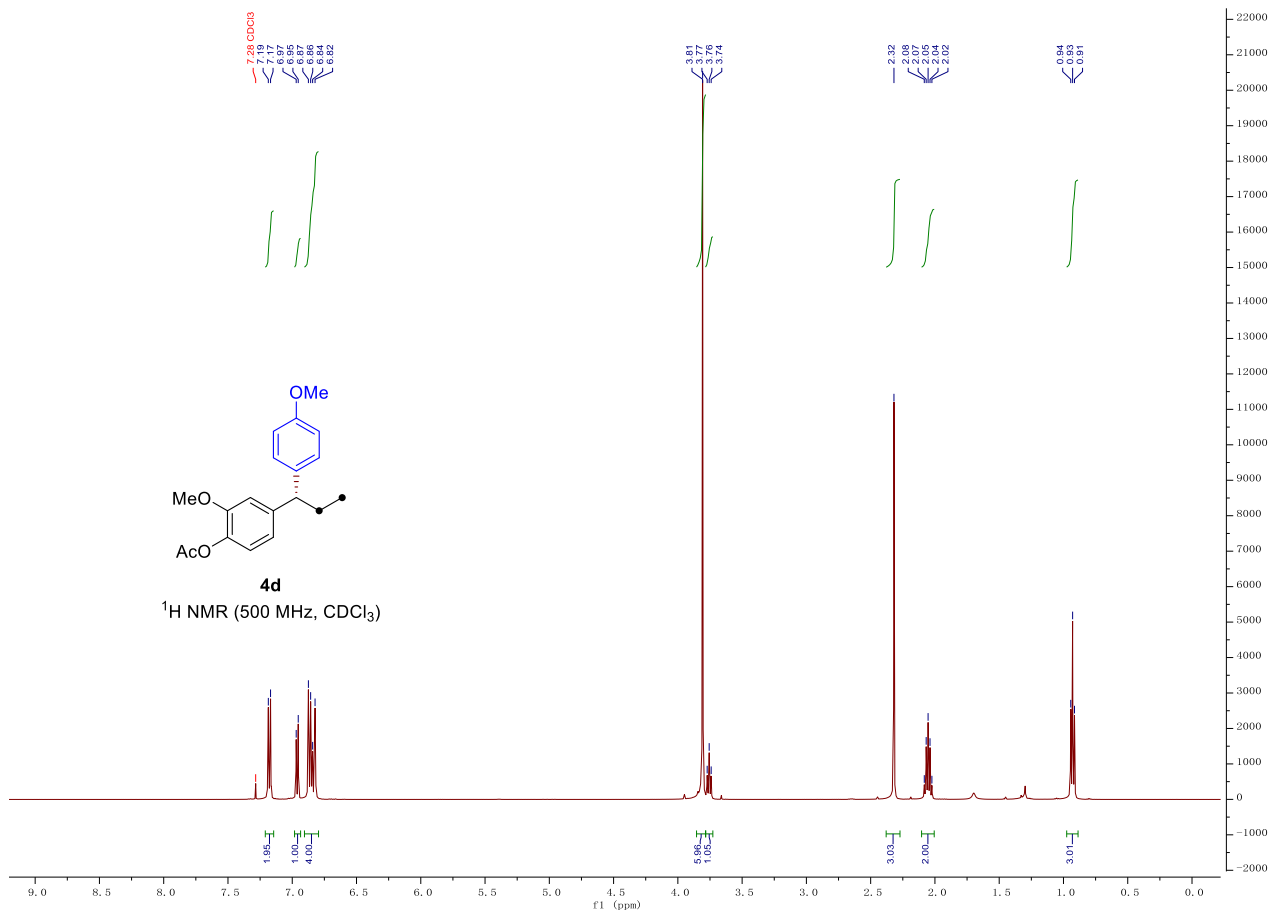

Supplementary Fig. 57.  $^1\text{H}$  NMR of compound **4d**

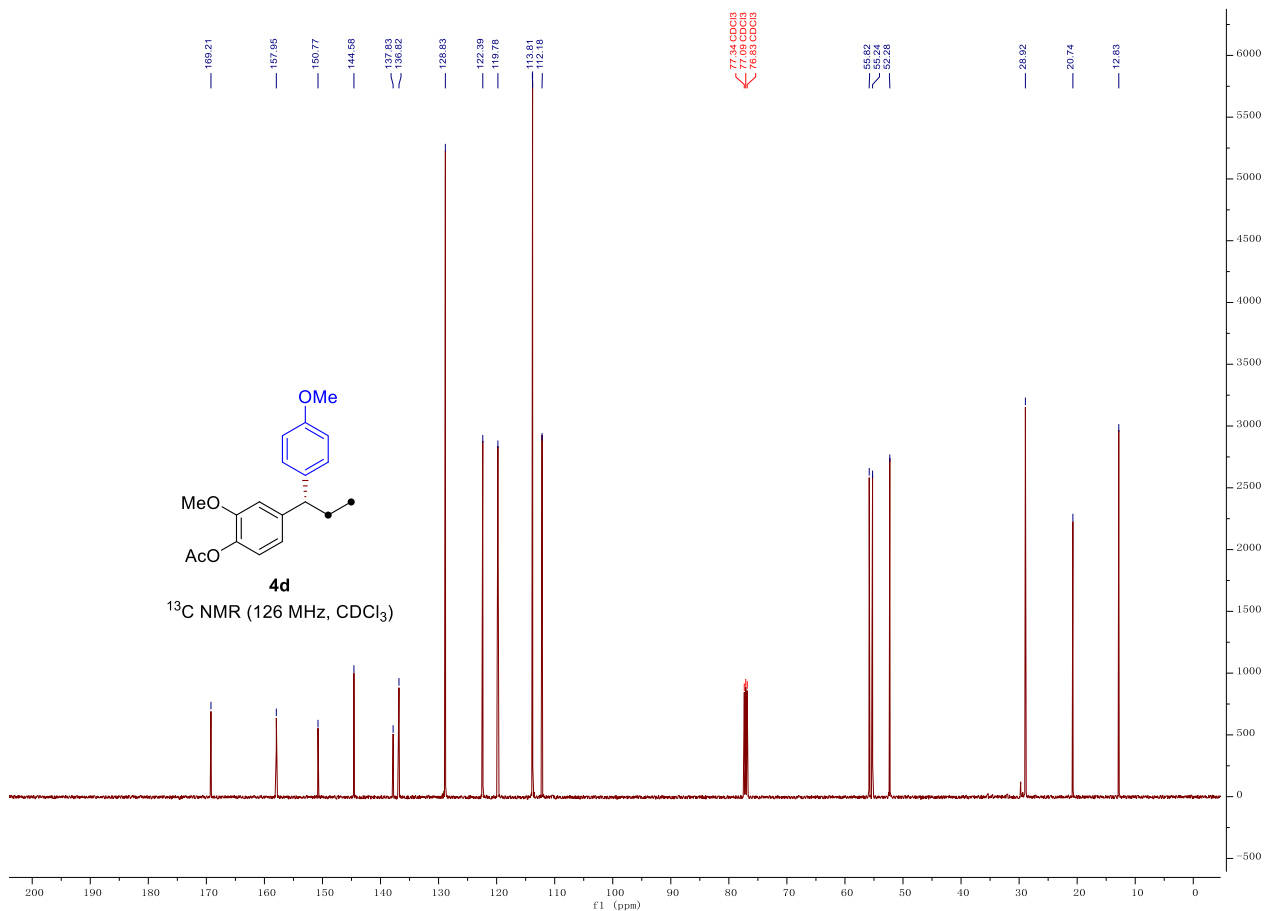

Supplementary Fig. 58.  $^{13}\text{C}$  NMR of compound **4d**

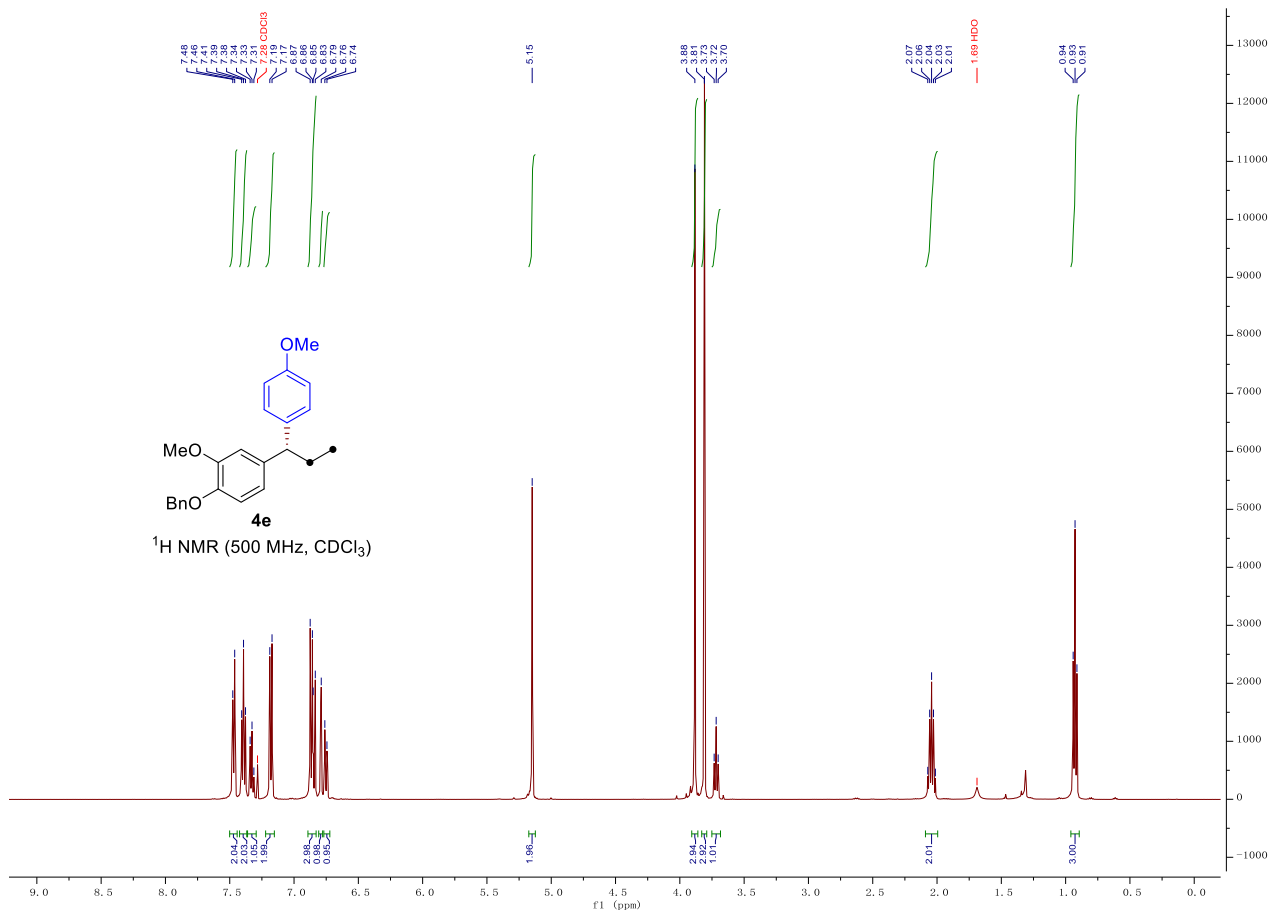

Supplementary Fig. 59.  $^1\text{H}$  NMR of compound **4e**



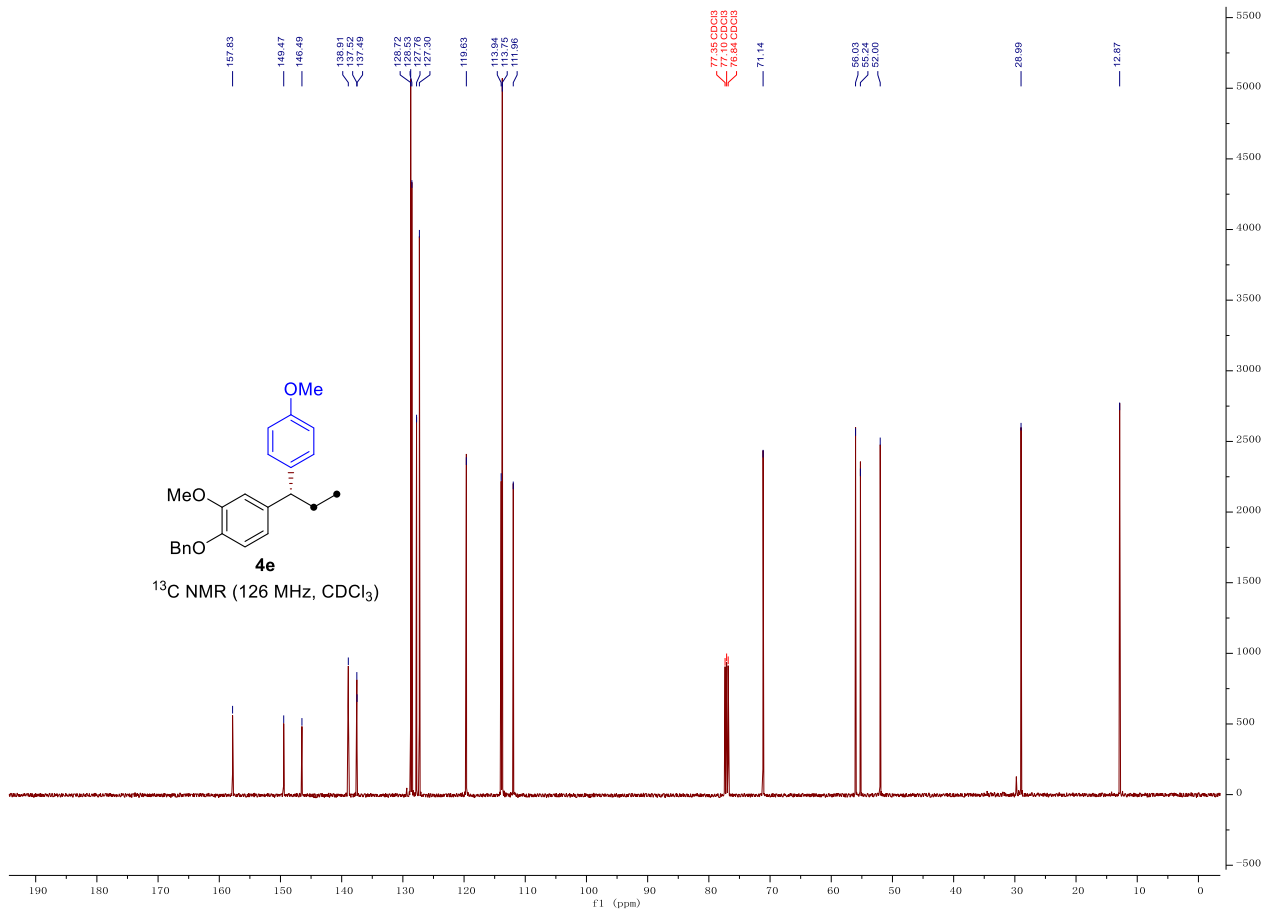

**Supplementary Fig. 60.  $^{13}\text{C}$  NMR of compound 4e**

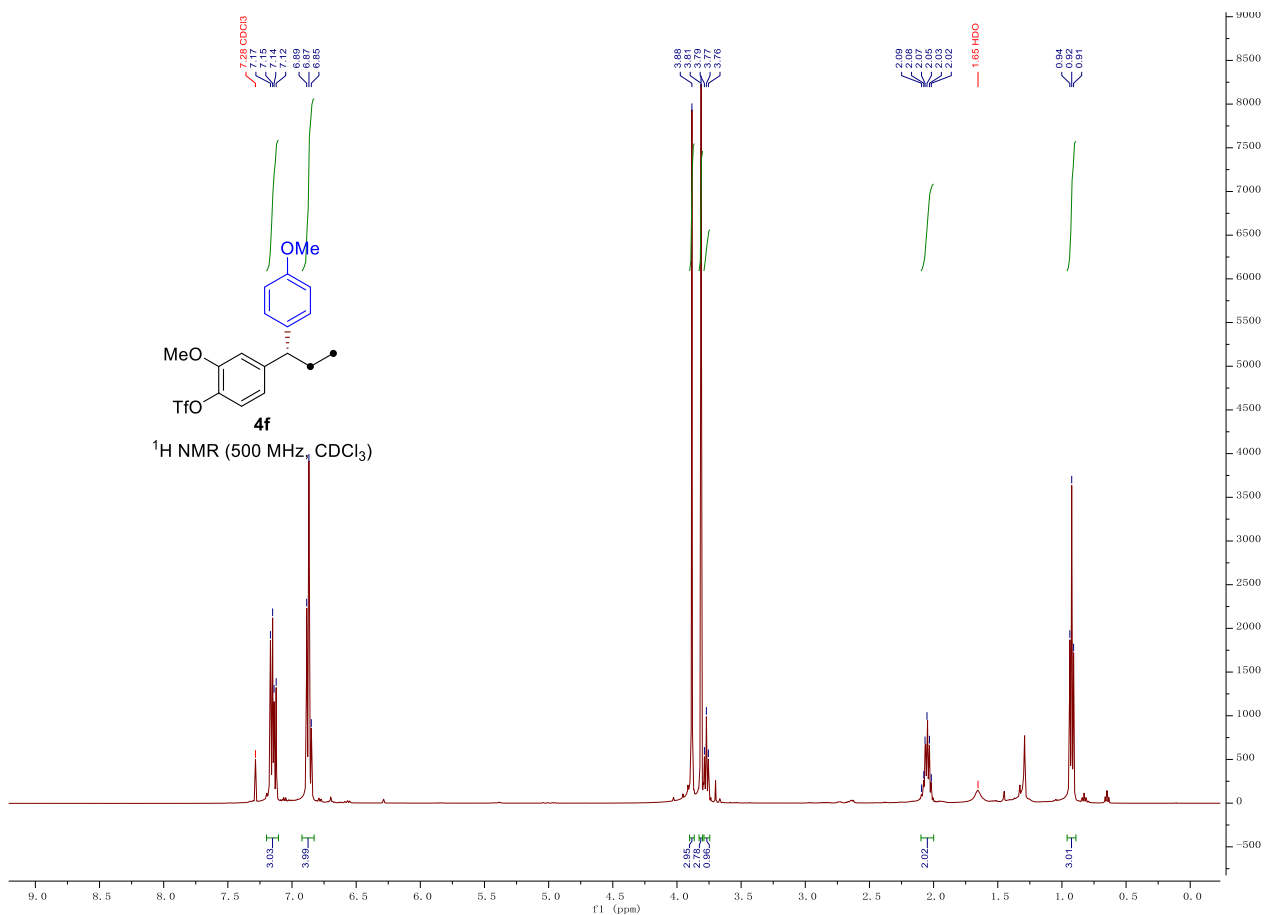

**Supplementary Fig. 61.  $^1\text{H}$  NMR of compound 4f**

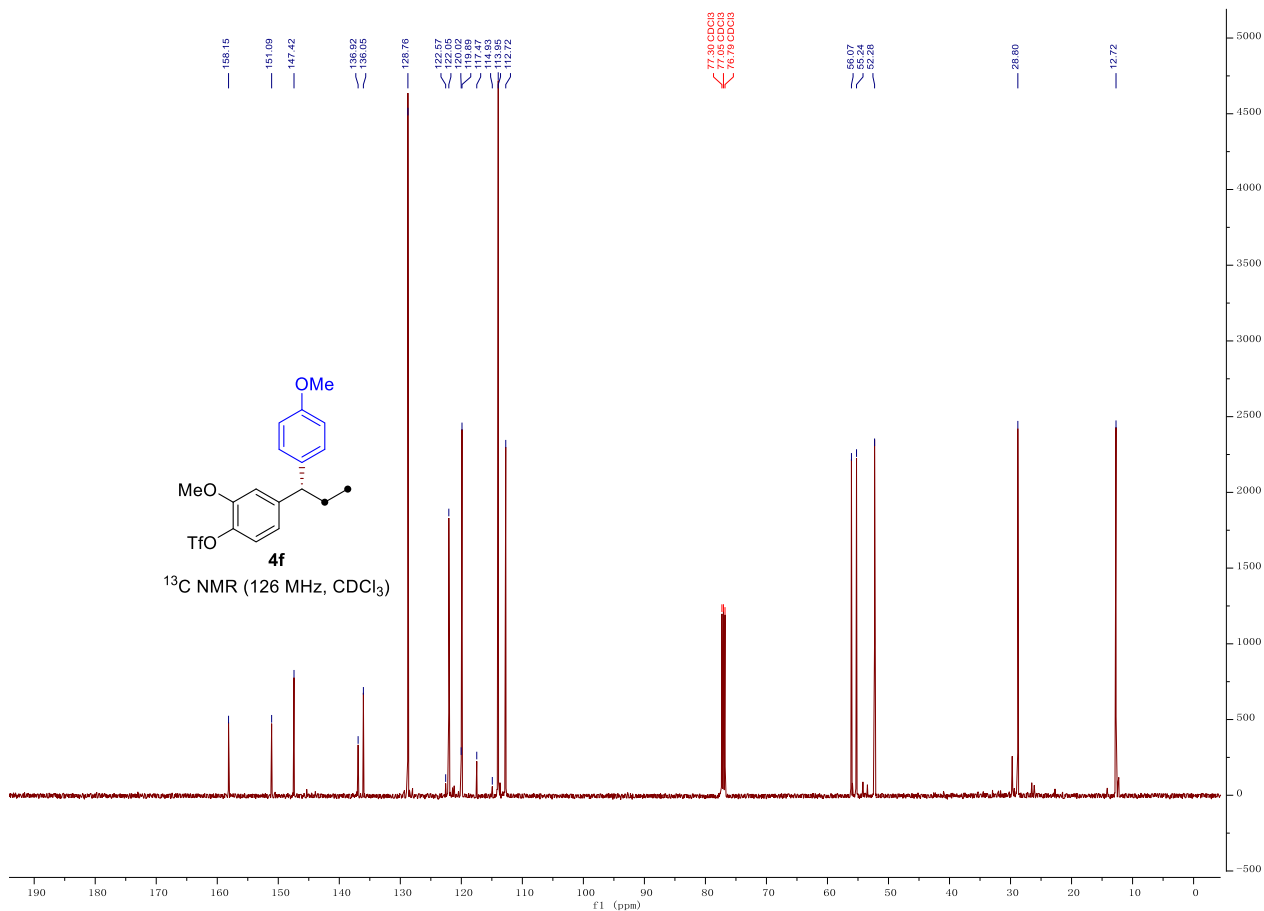

Supplementary Fig. 62. <sup>13</sup>C NMR of compound **4f**

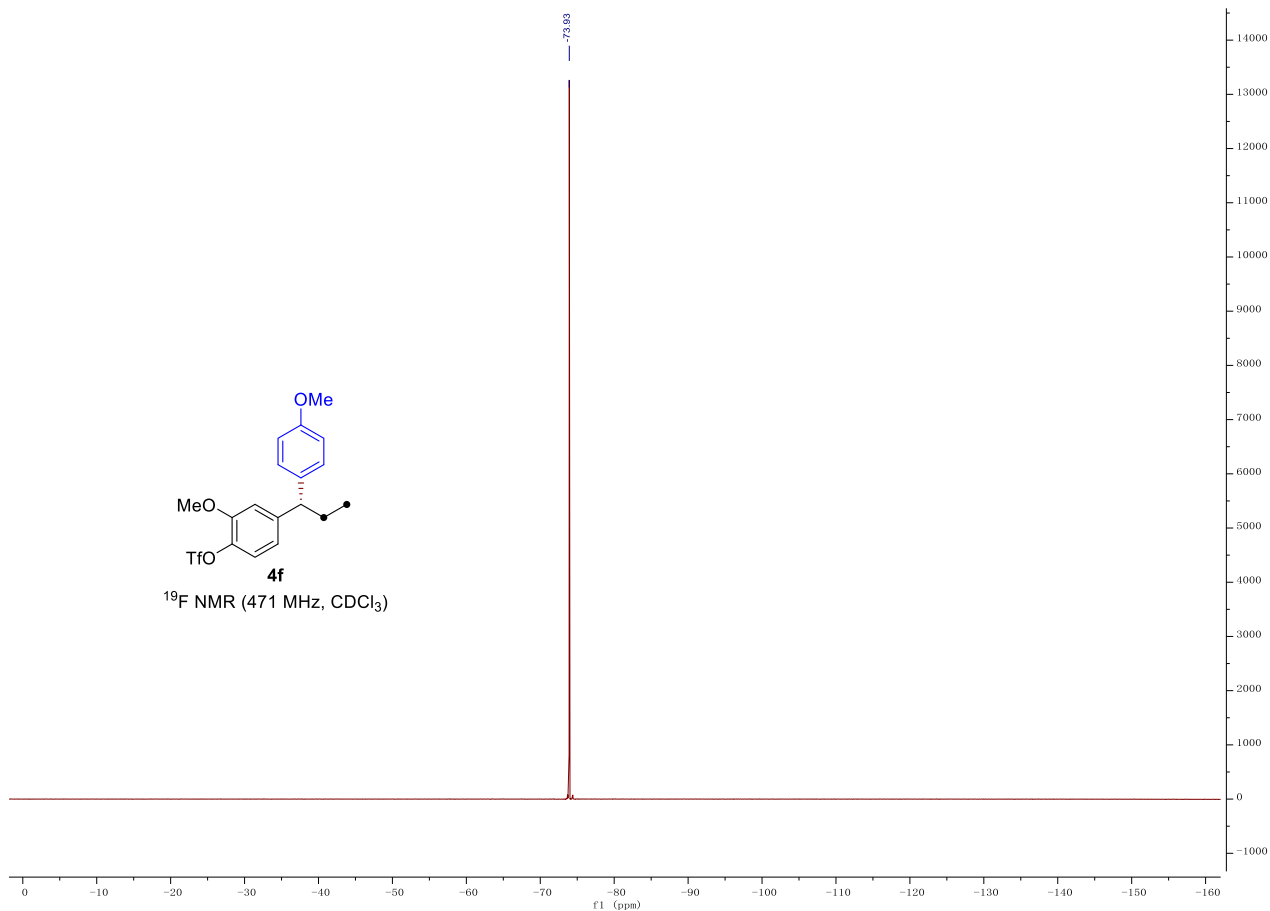

Supplementary Fig. 63. <sup>19</sup>F NMR of compound **4f**

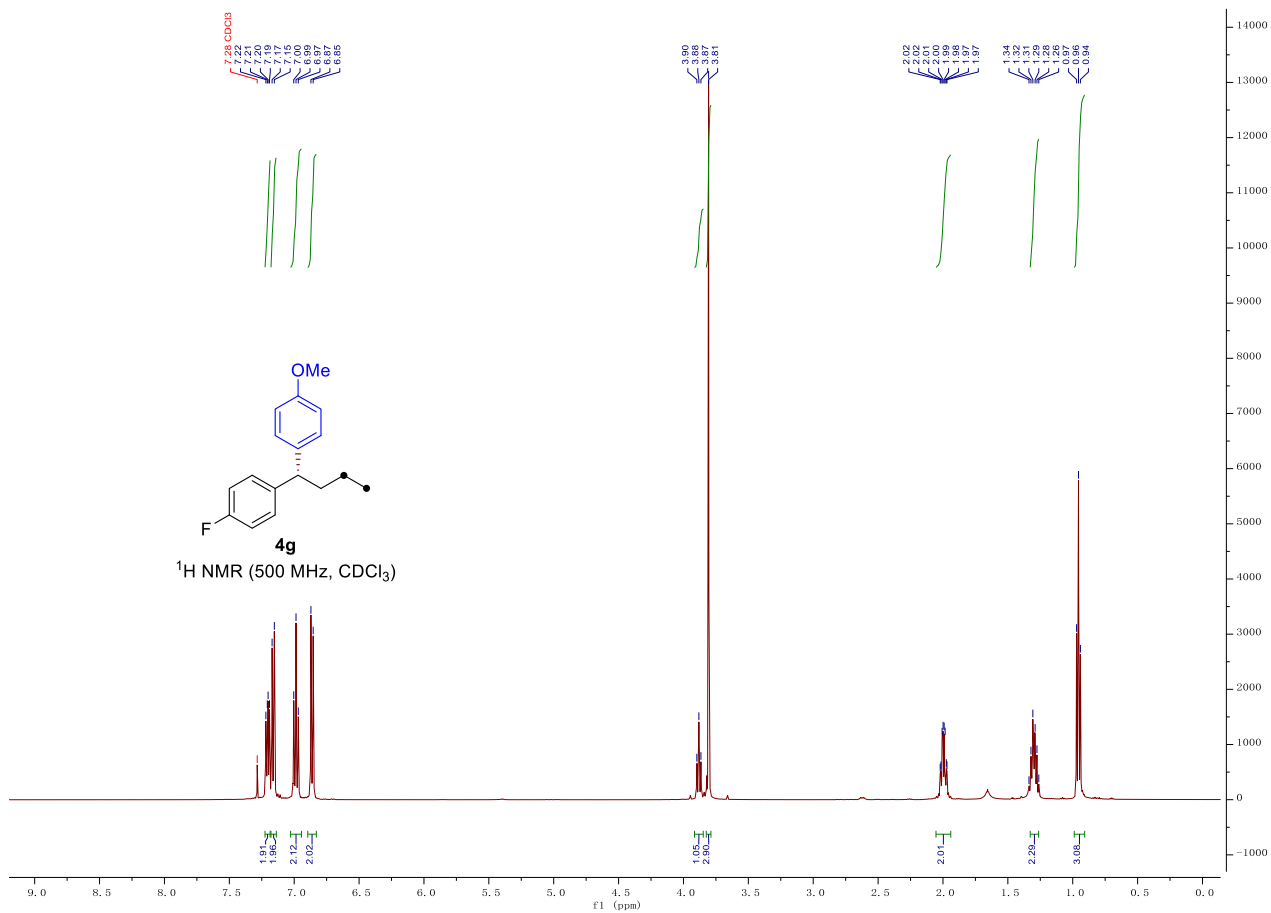

Supplementary Fig. 64. <sup>1</sup>H NMR of compound 4g

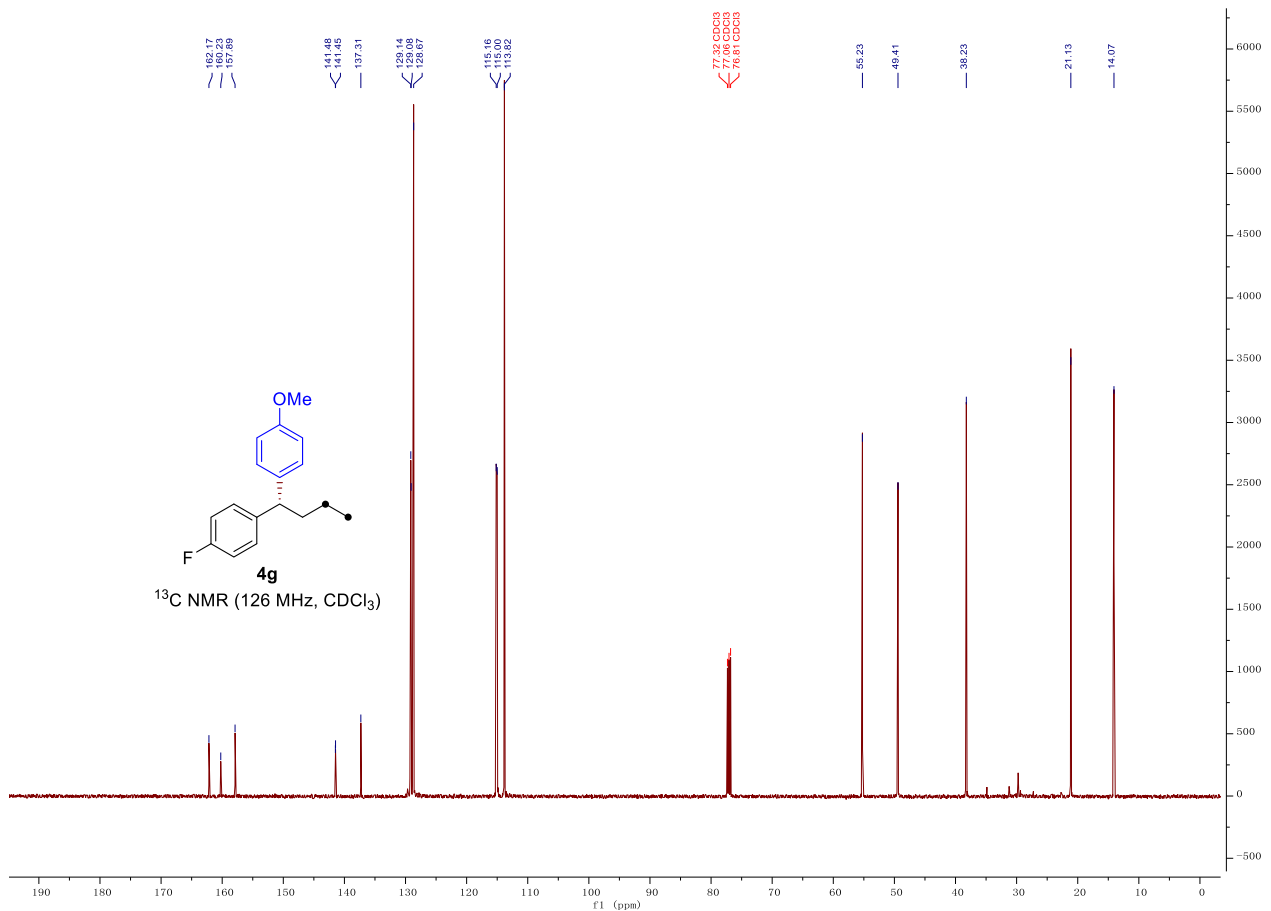

Supplementary Fig. 65. <sup>13</sup>C NMR of compound 4g

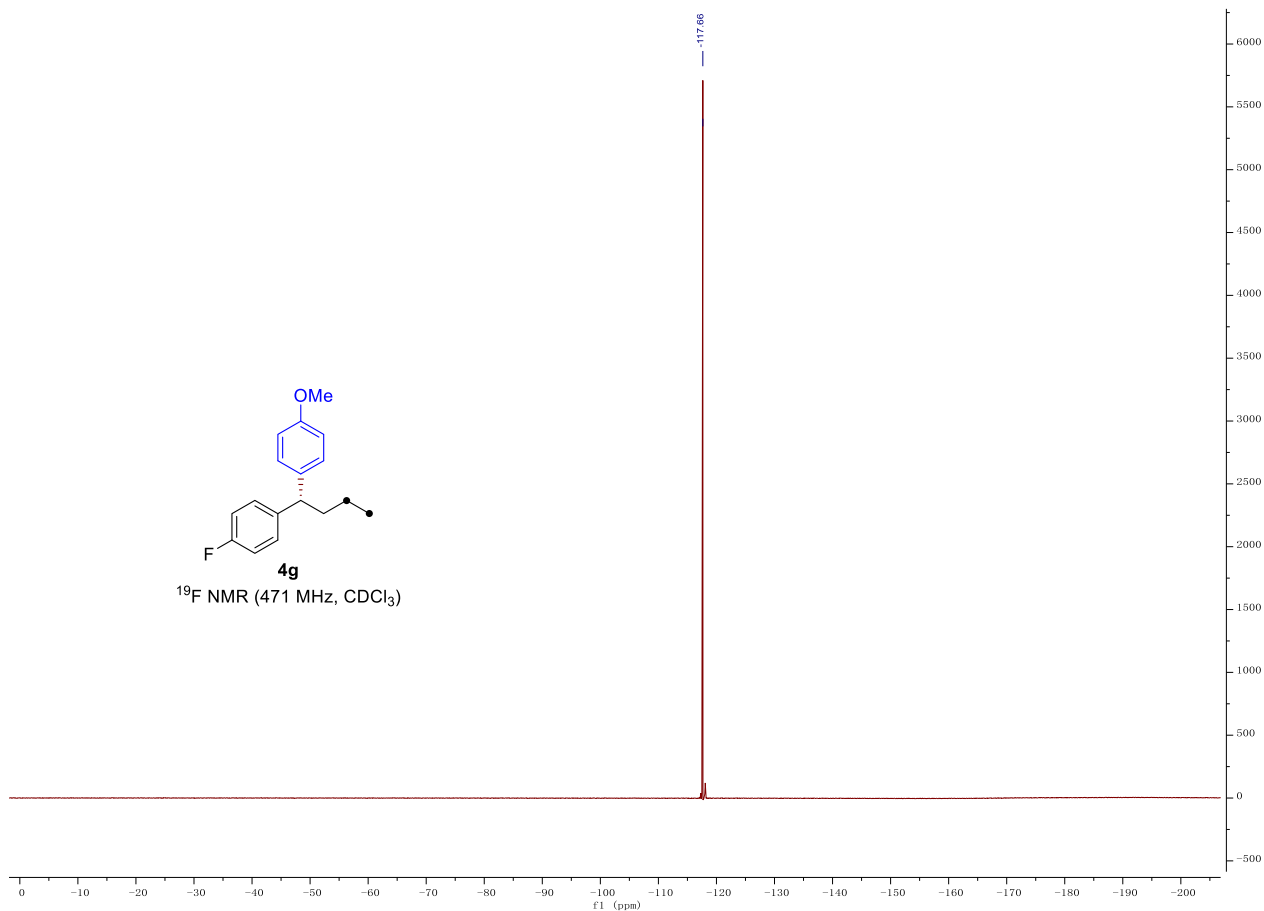

Supplementary Fig. 66. <sup>19</sup>F NMR of compound **4g**

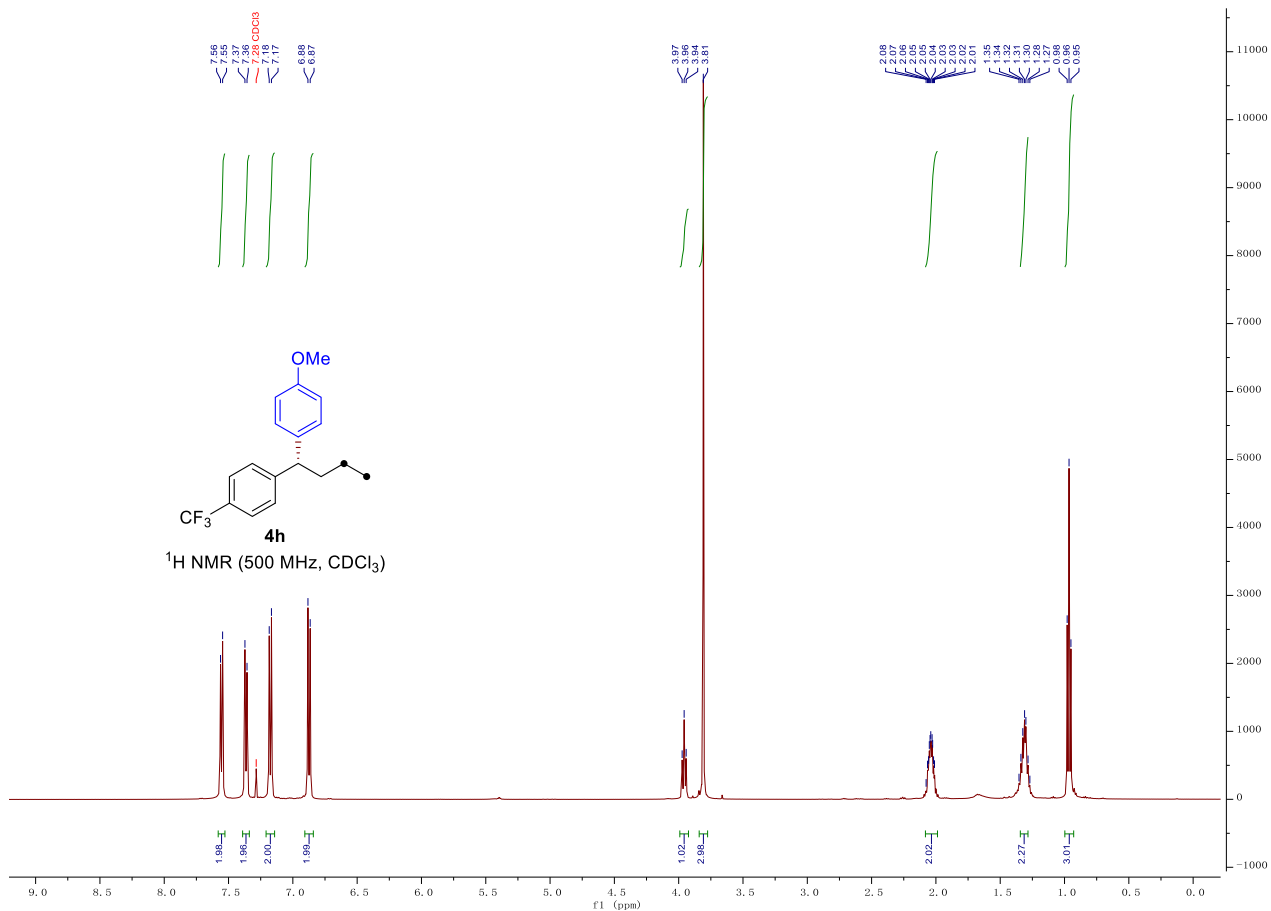

Supplementary Fig. 67. <sup>1</sup>H NMR of compound **4h**

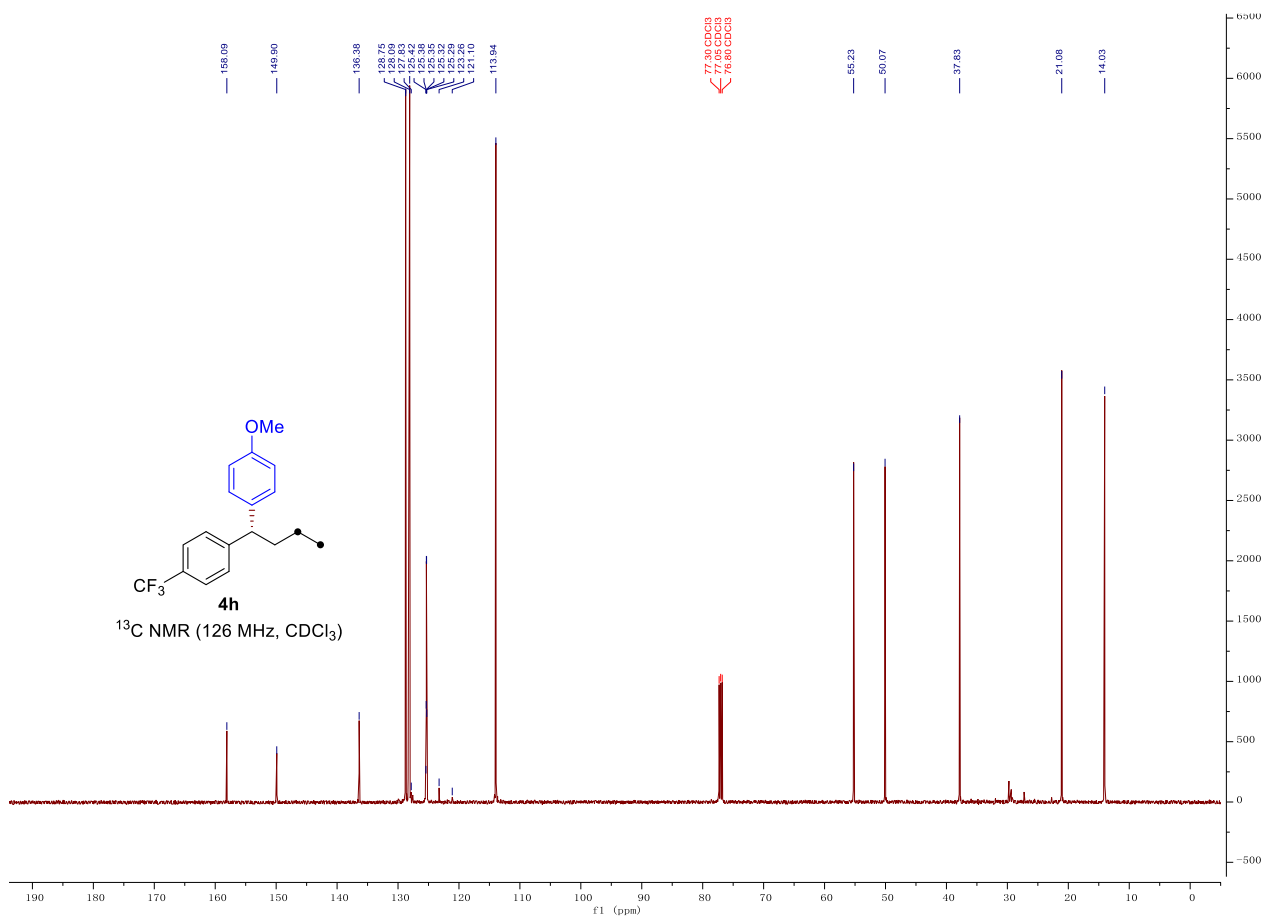

Supplementary Fig. 68. <sup>13</sup>C NMR of compound **4h**

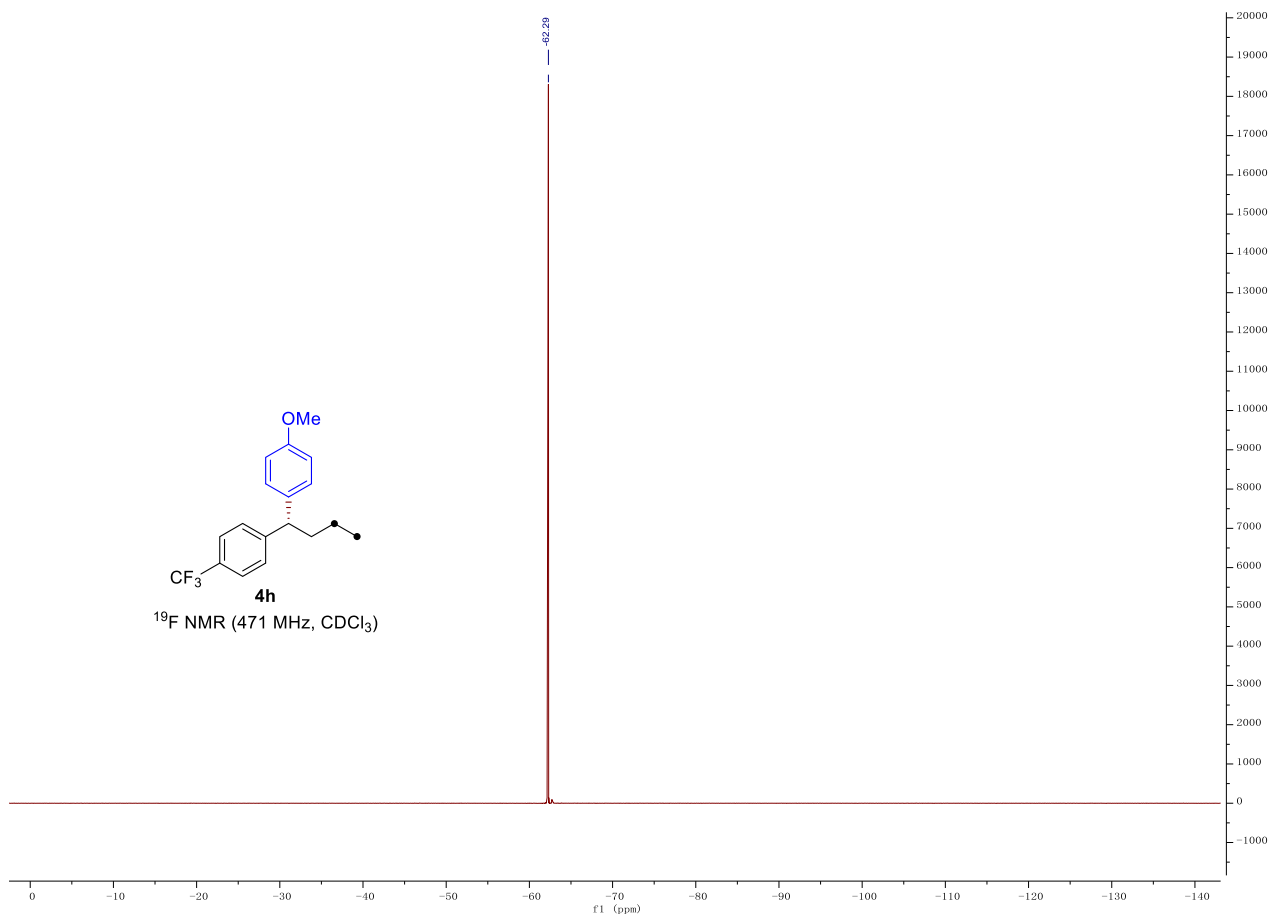

Supplementary Fig. 69. <sup>19</sup>F NMR of compound **4h**

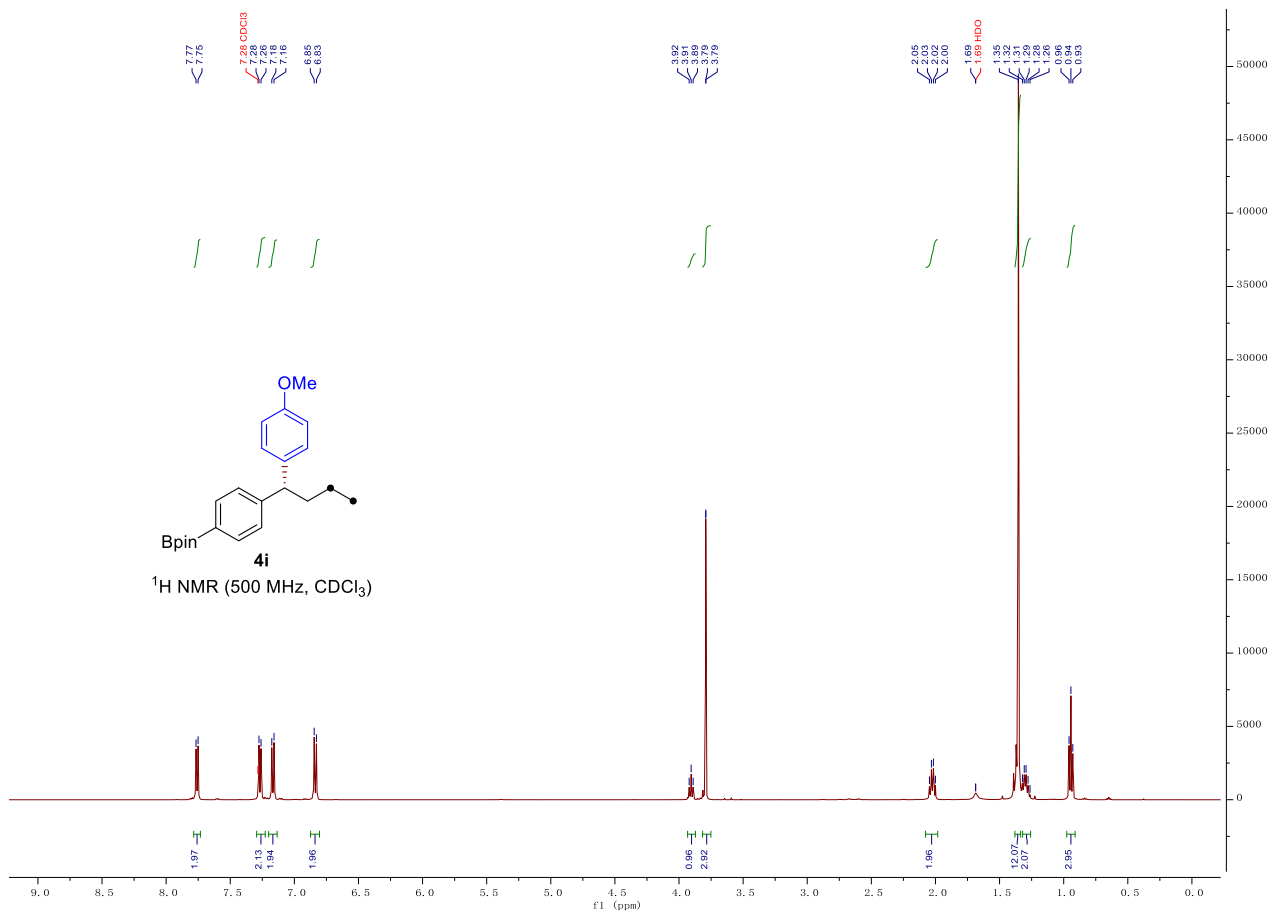

**Supplementary Fig. 70. <sup>1</sup>H NMR of compound 4i**

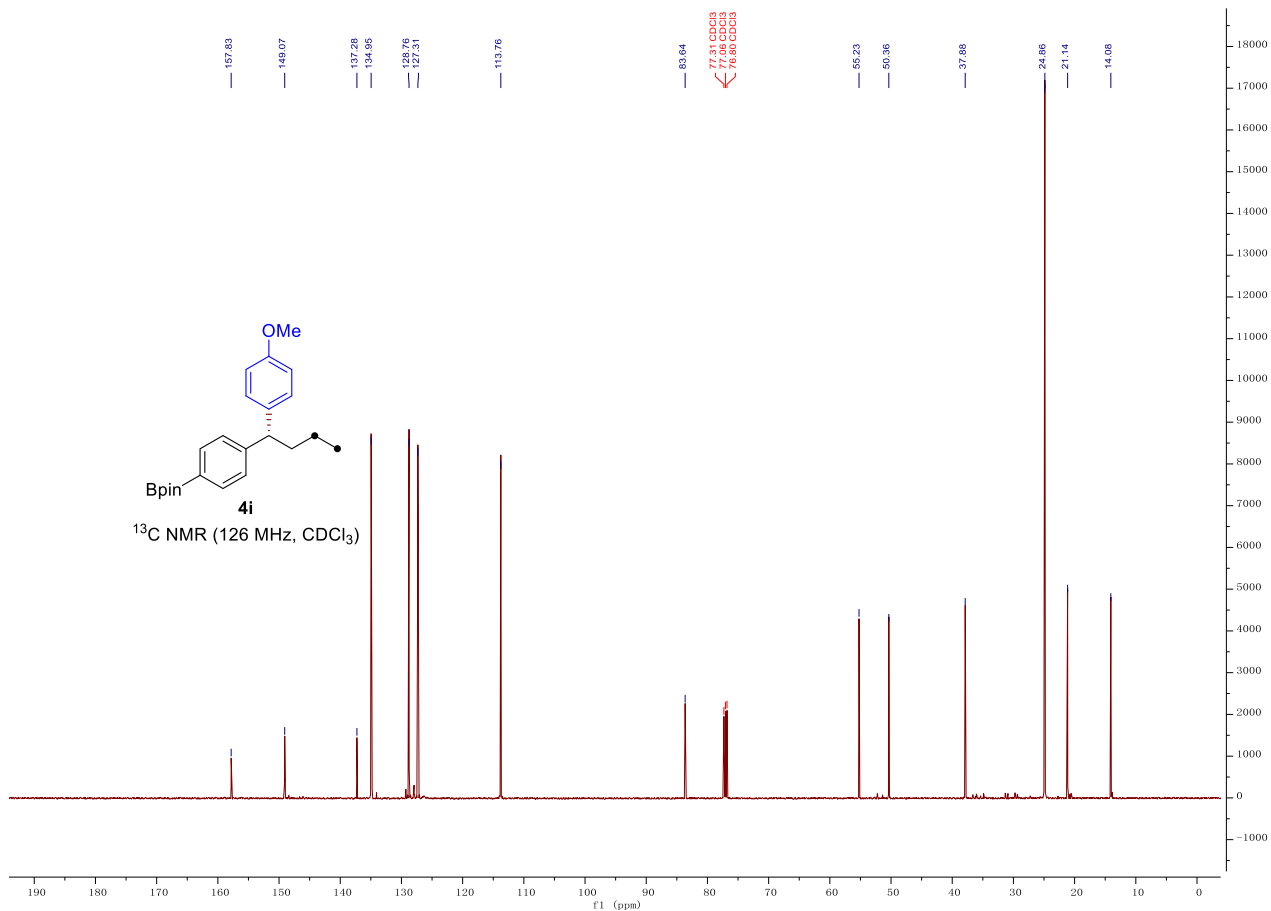

**Supplementary Fig. 71. <sup>13</sup>C NMR of compound 4i**

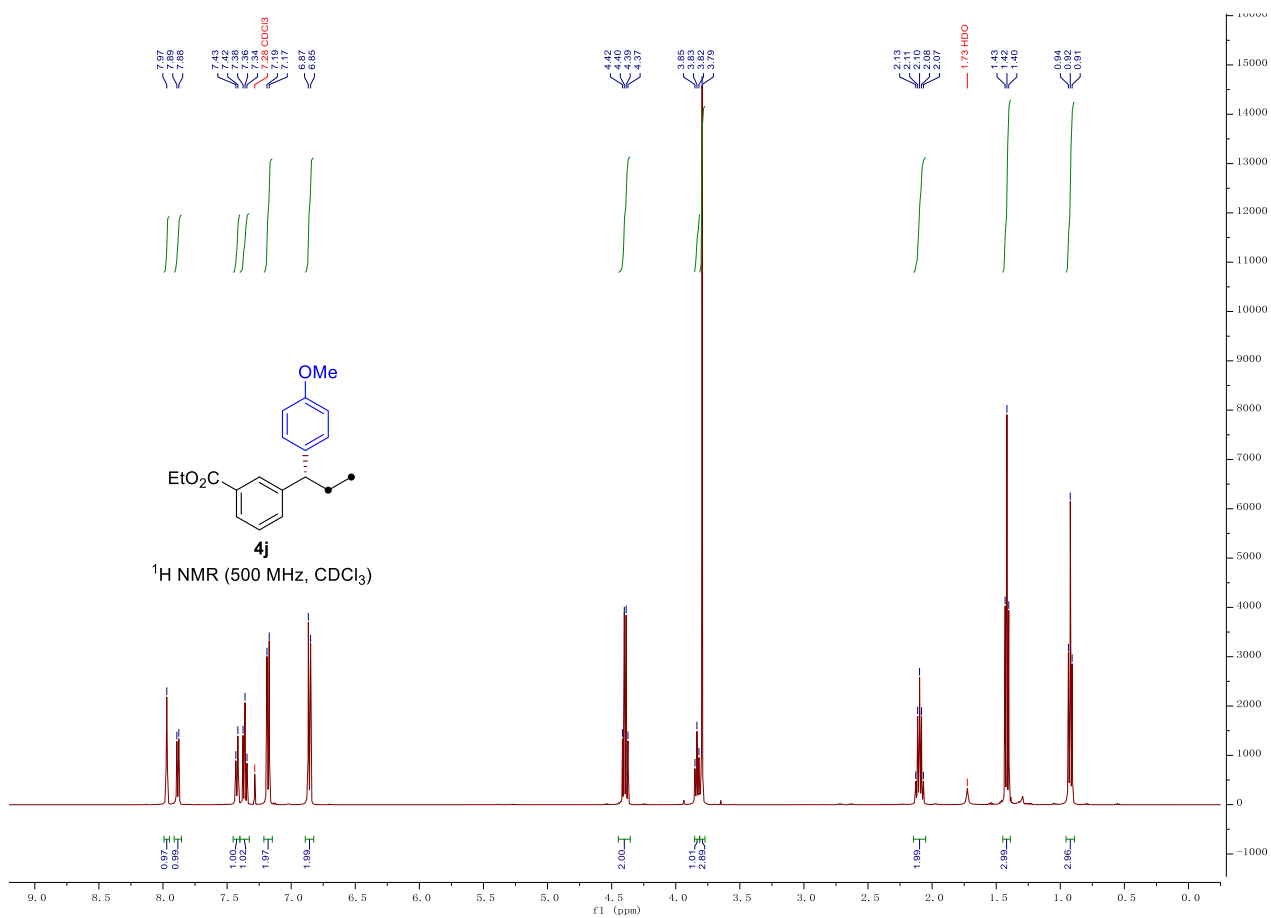

**Supplementary Fig. 72.  $^1\text{H}$  NMR of compound 4j**

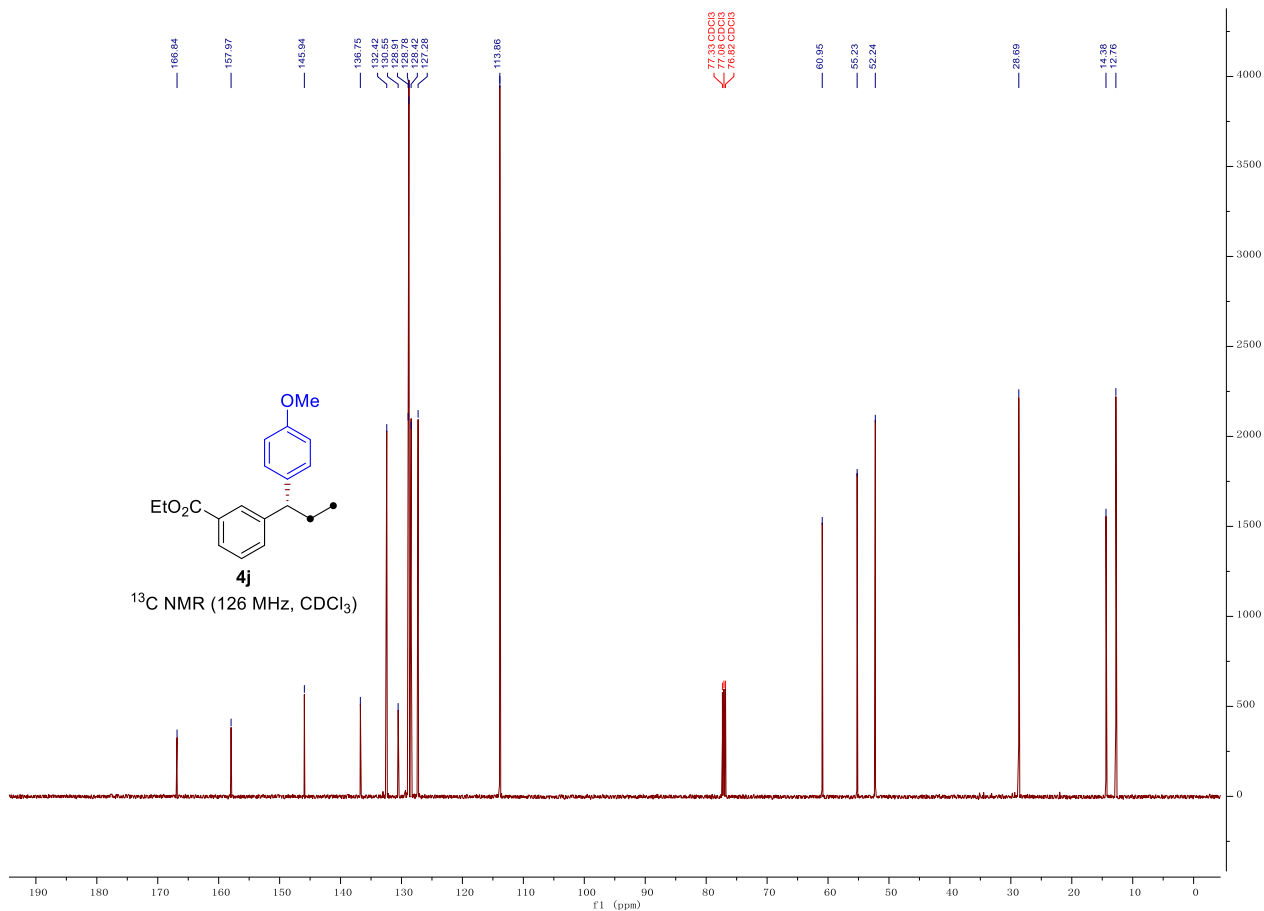

**Supplementary Fig. 73.  $^{13}\text{C}$  NMR of compound 4j**

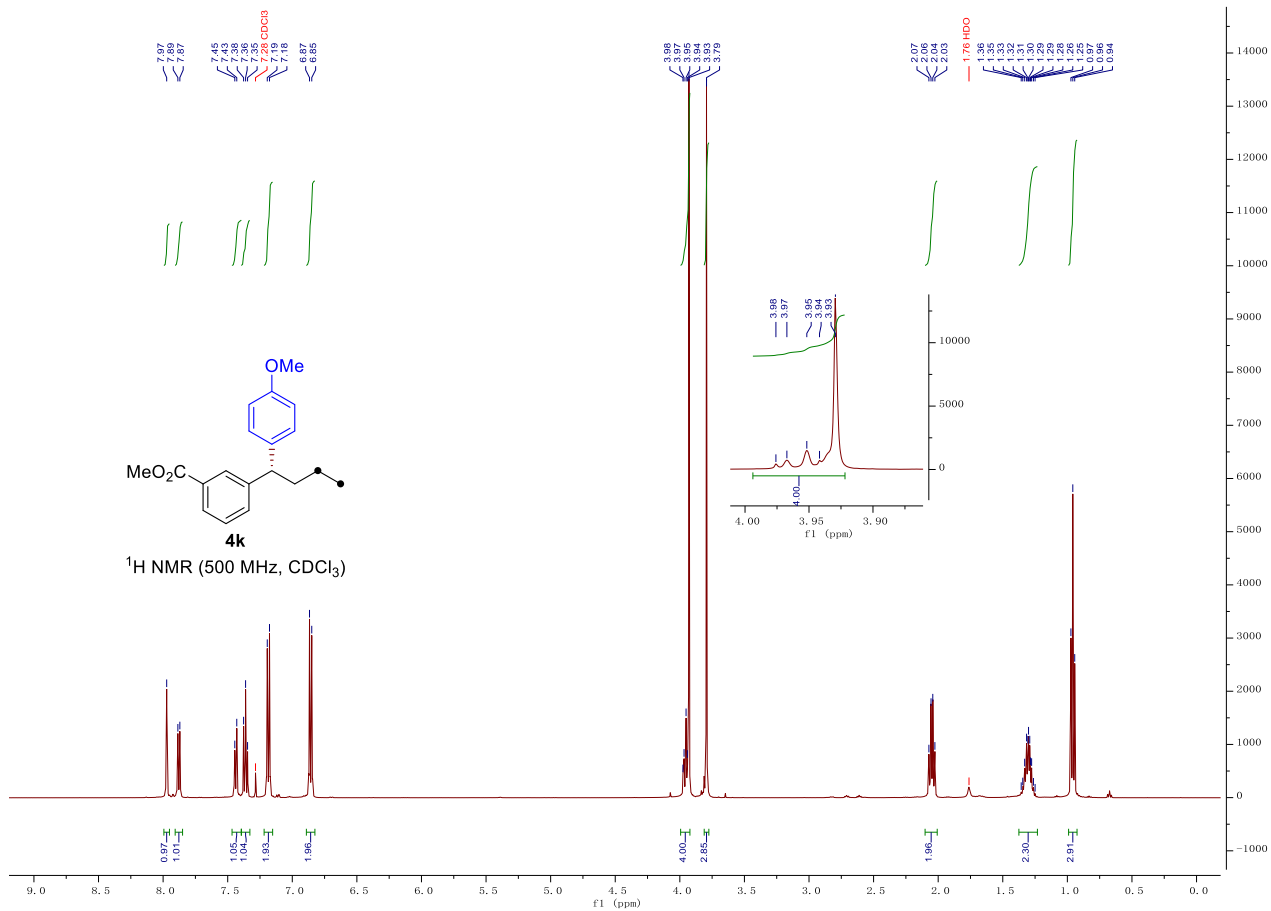

Supplementary Fig. 74. <sup>1</sup>H NMR of compound **4k**

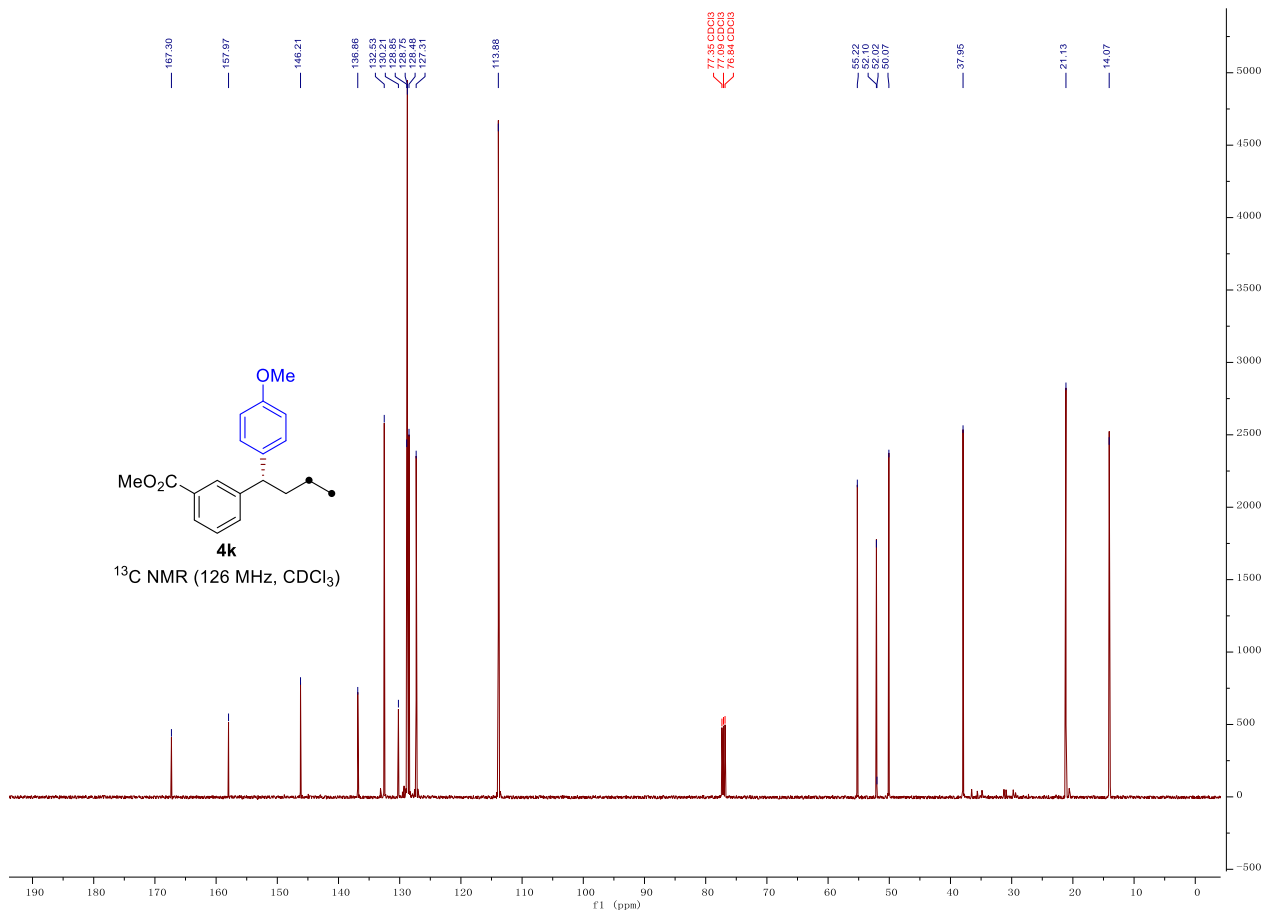

Supplementary Fig. 75. <sup>13</sup>C NMR of compound **4k**



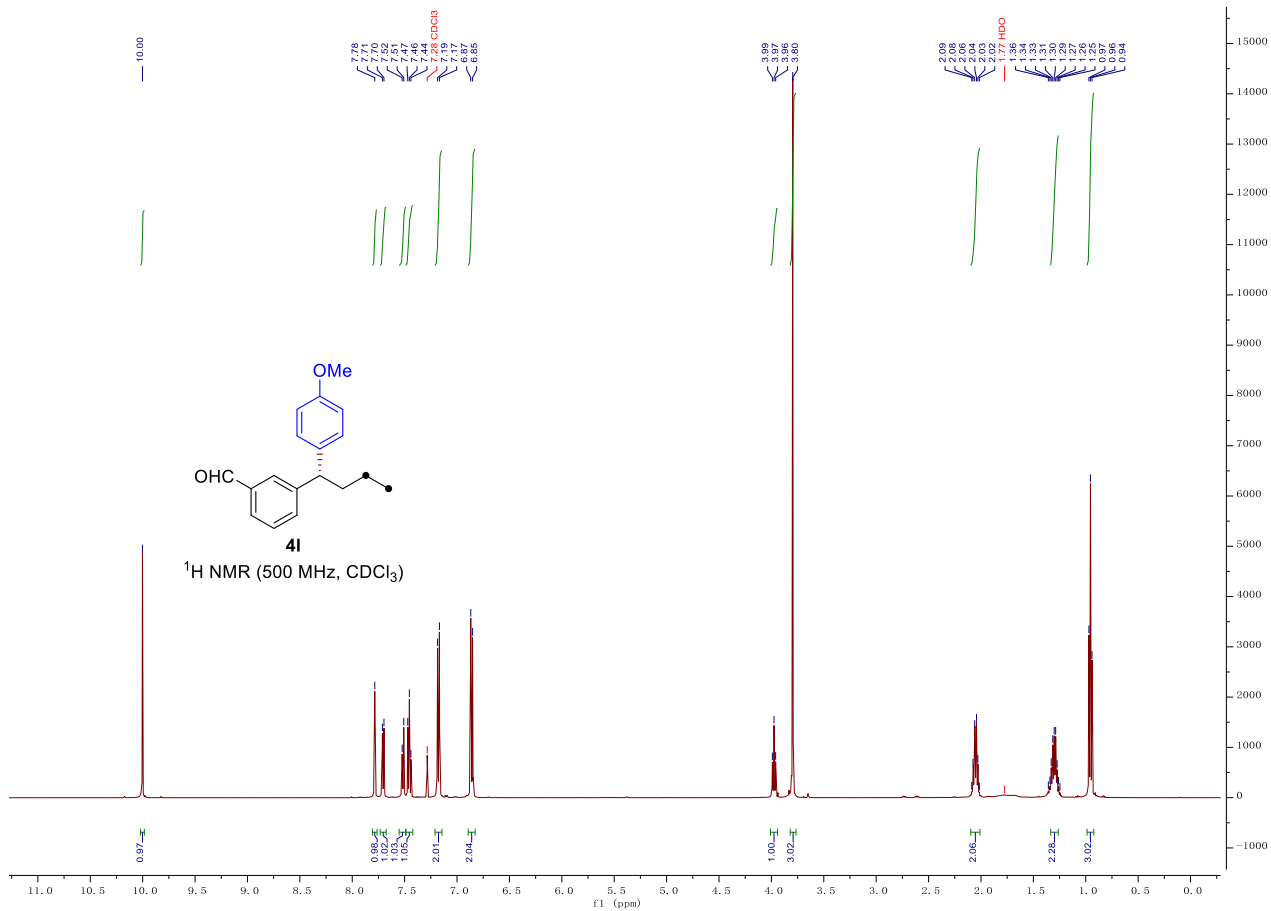

Supplementary Fig. 76. <sup>1</sup>H NMR of compound **4I**

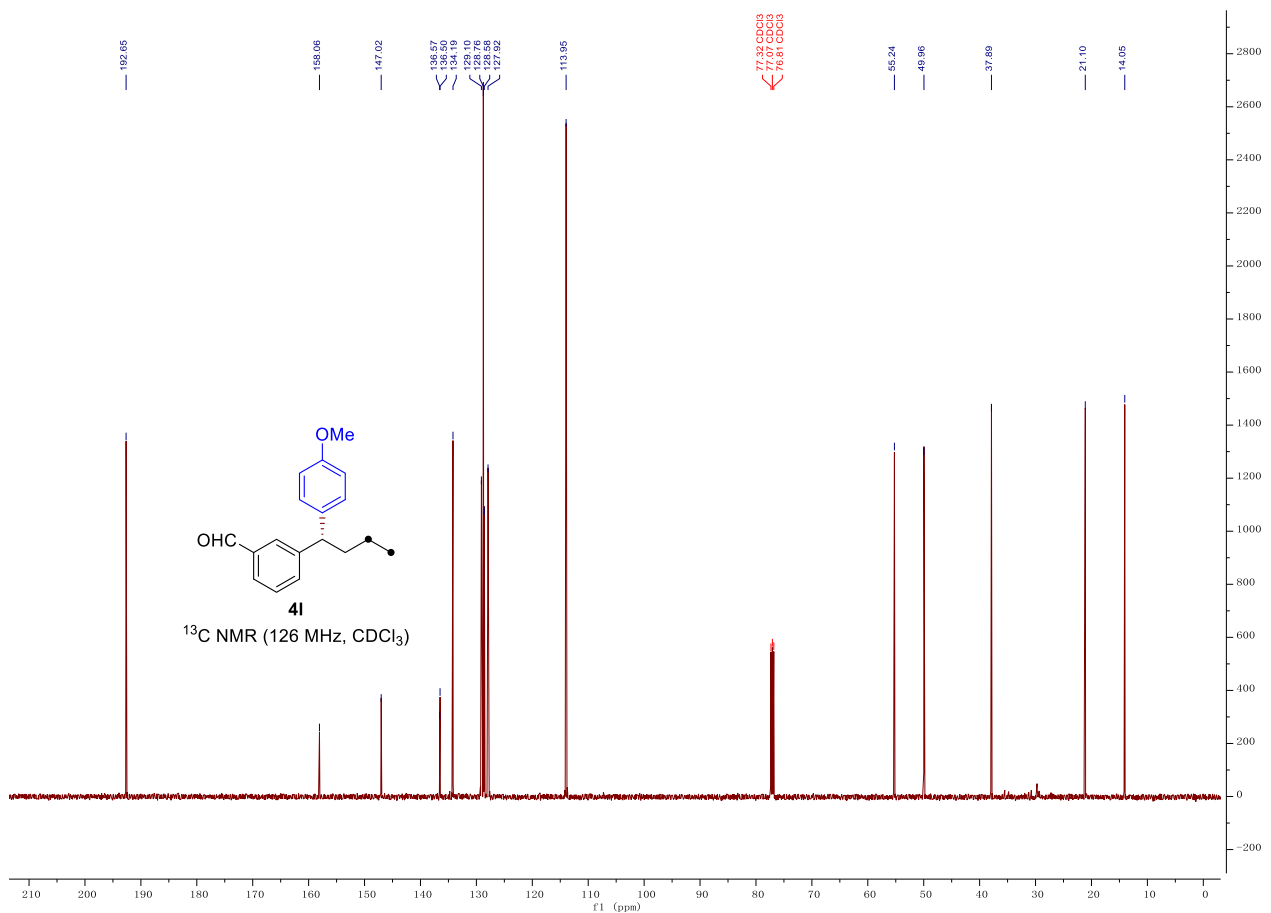

Supplementary Fig. 77. <sup>13</sup>C NMR of compound **4I**

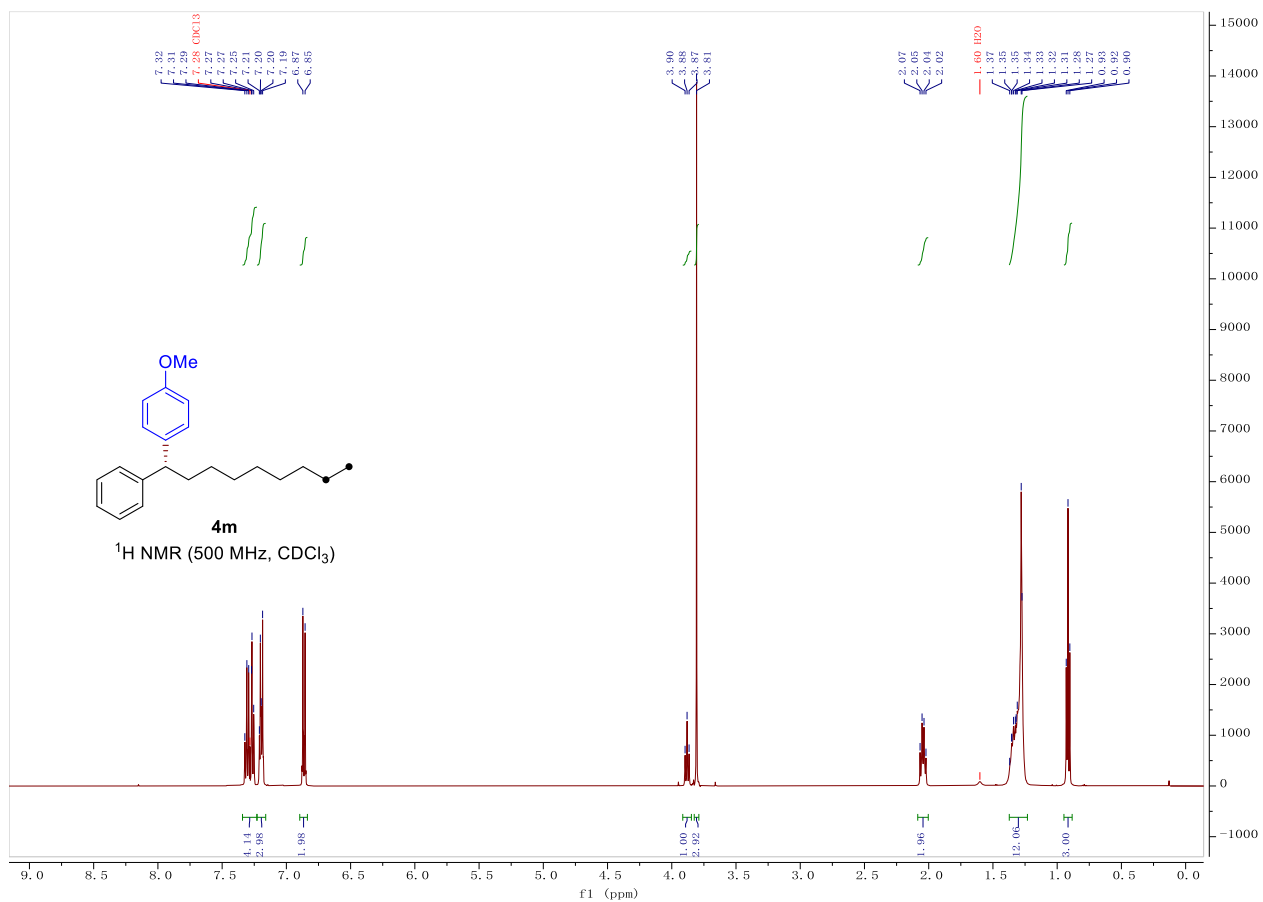

Supplementary Fig. 78.  $^1\text{H NMR}$  of compound **4m**

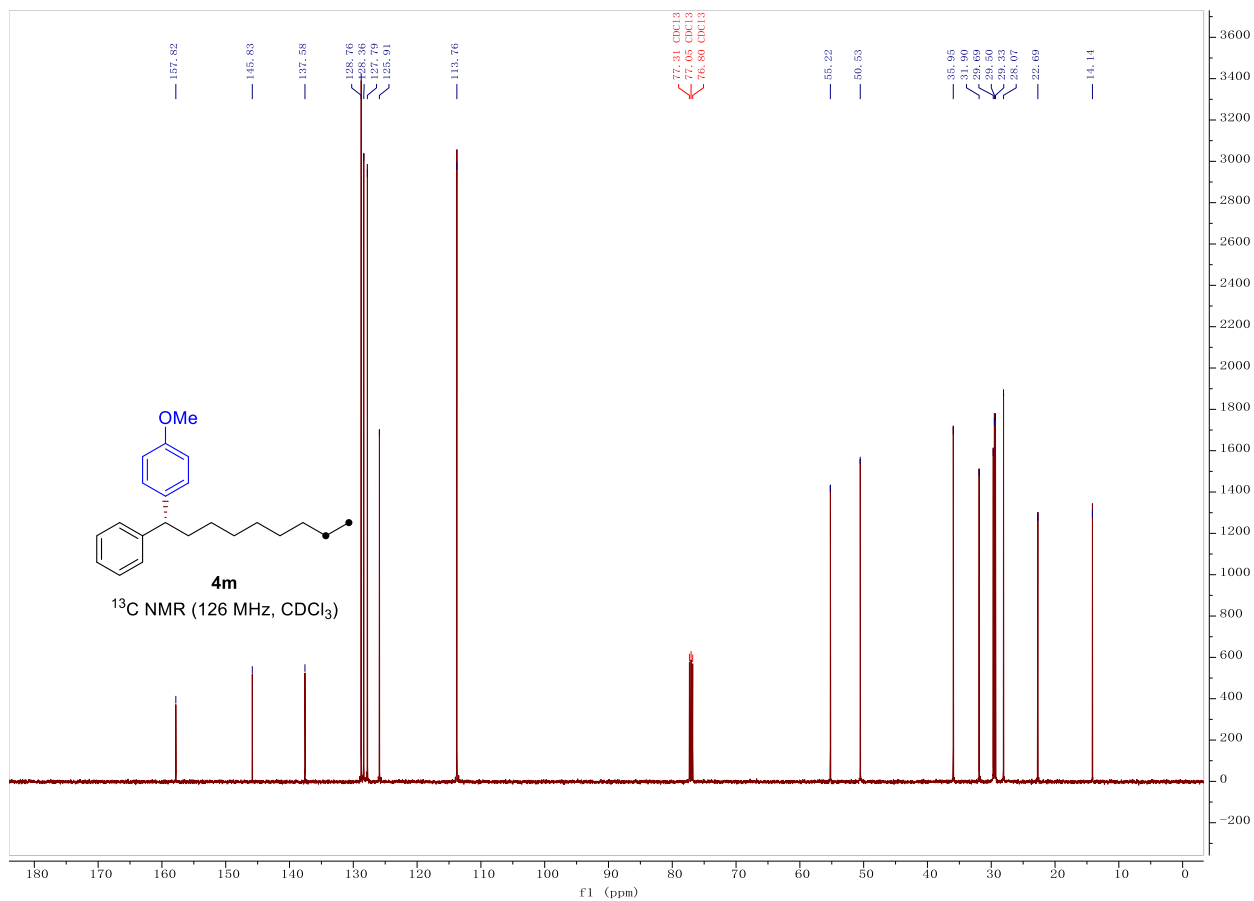

Supplementary Fig. 79.  $^{13}\text{C NMR}$  of compound **4m**

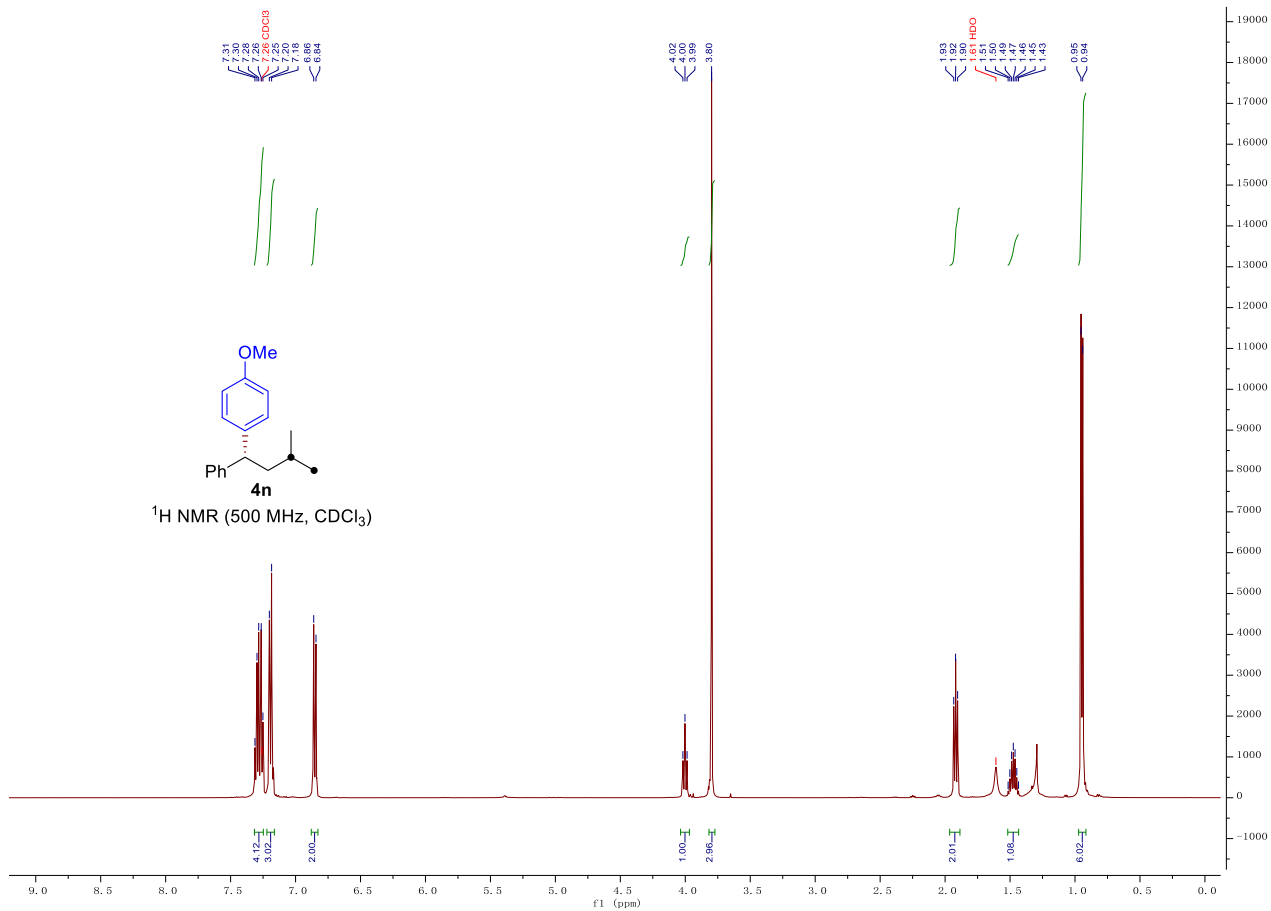

**Supplementary Fig. 80. <sup>1</sup>H NMR of compound 4n**

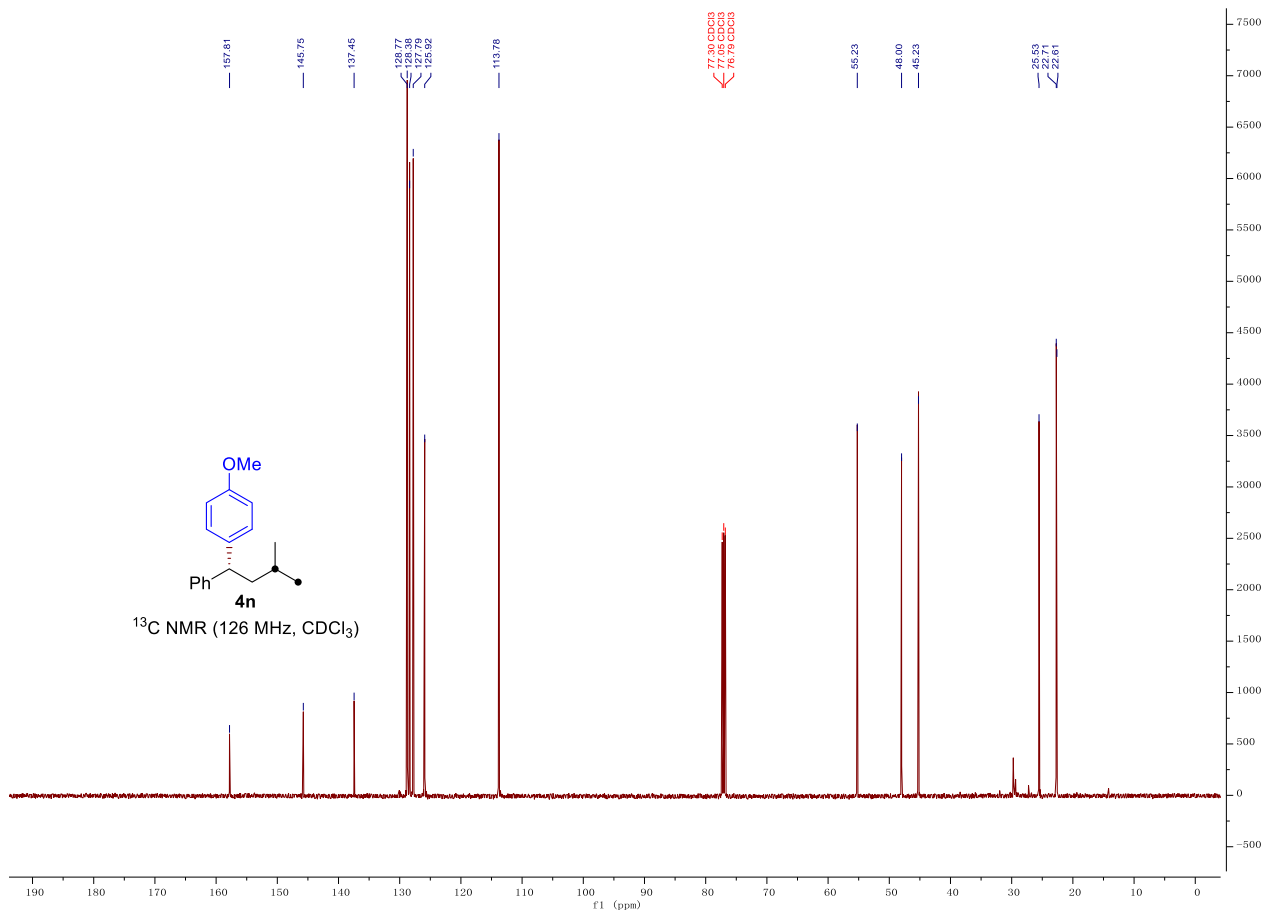

**Supplementary Fig. 81. <sup>13</sup>C NMR of compound 4n**

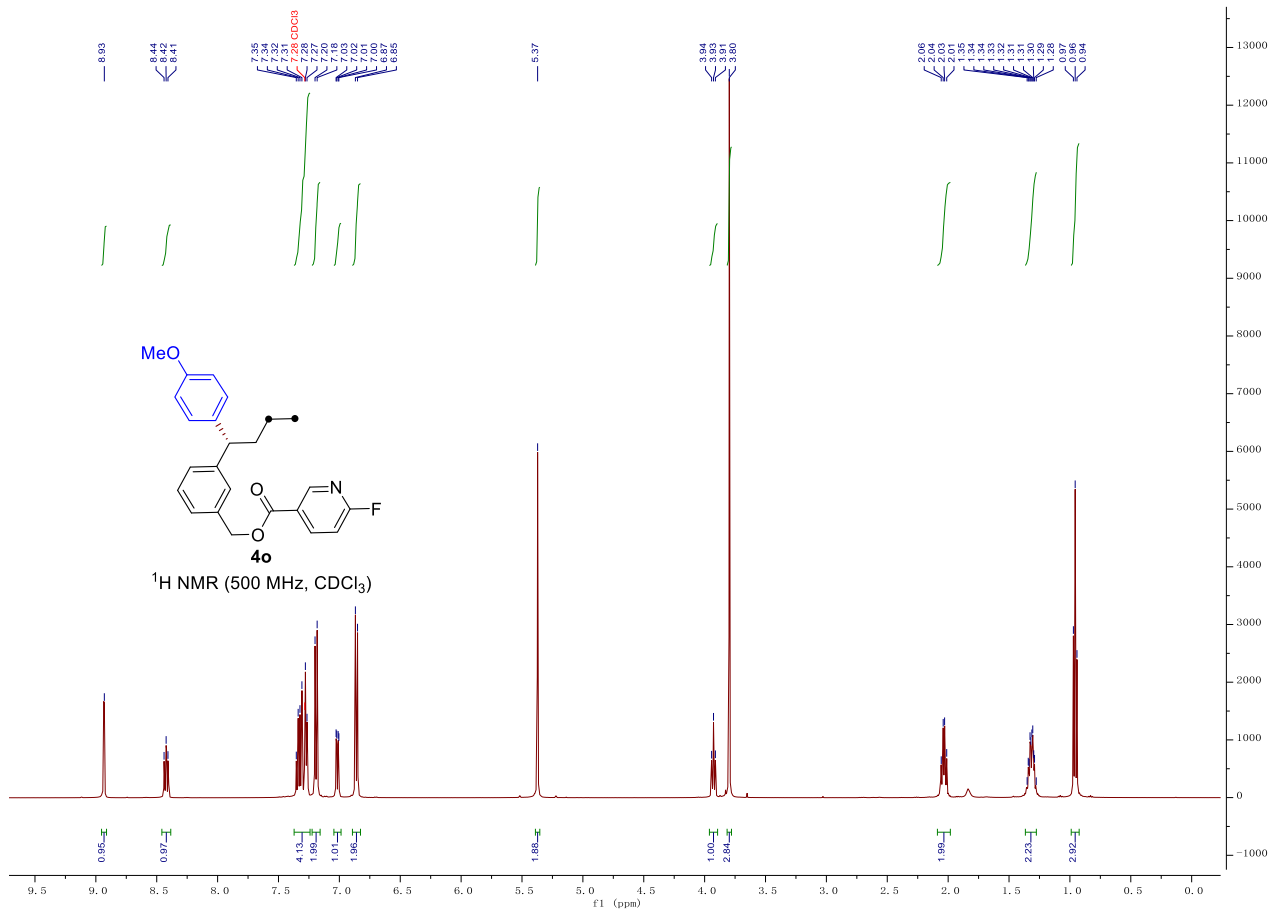

**Supplementary Fig. 82.** <sup>1</sup>H NMR of compound **4o**

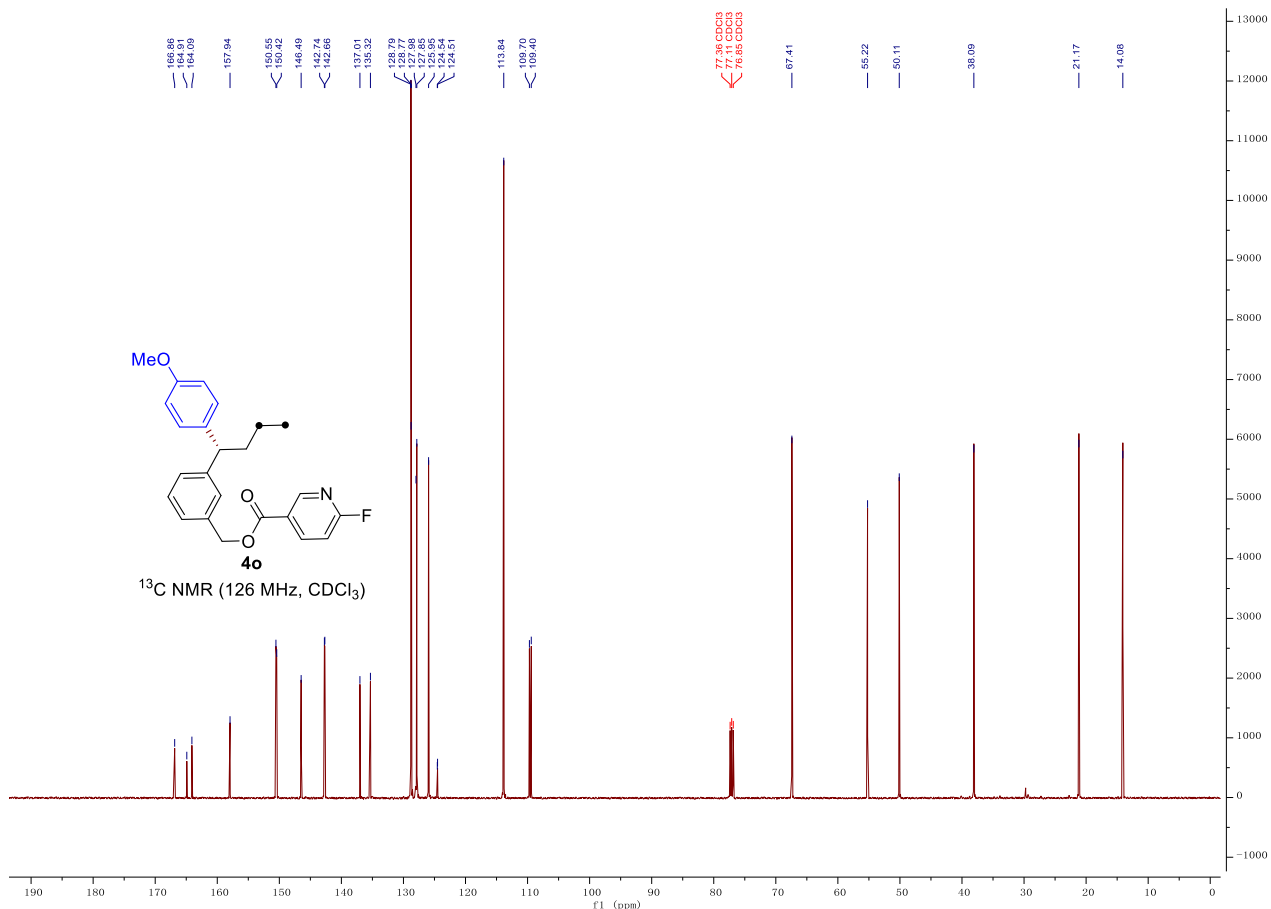

**Supplementary Fig. 83.** <sup>13</sup>C NMR of compound **4o**

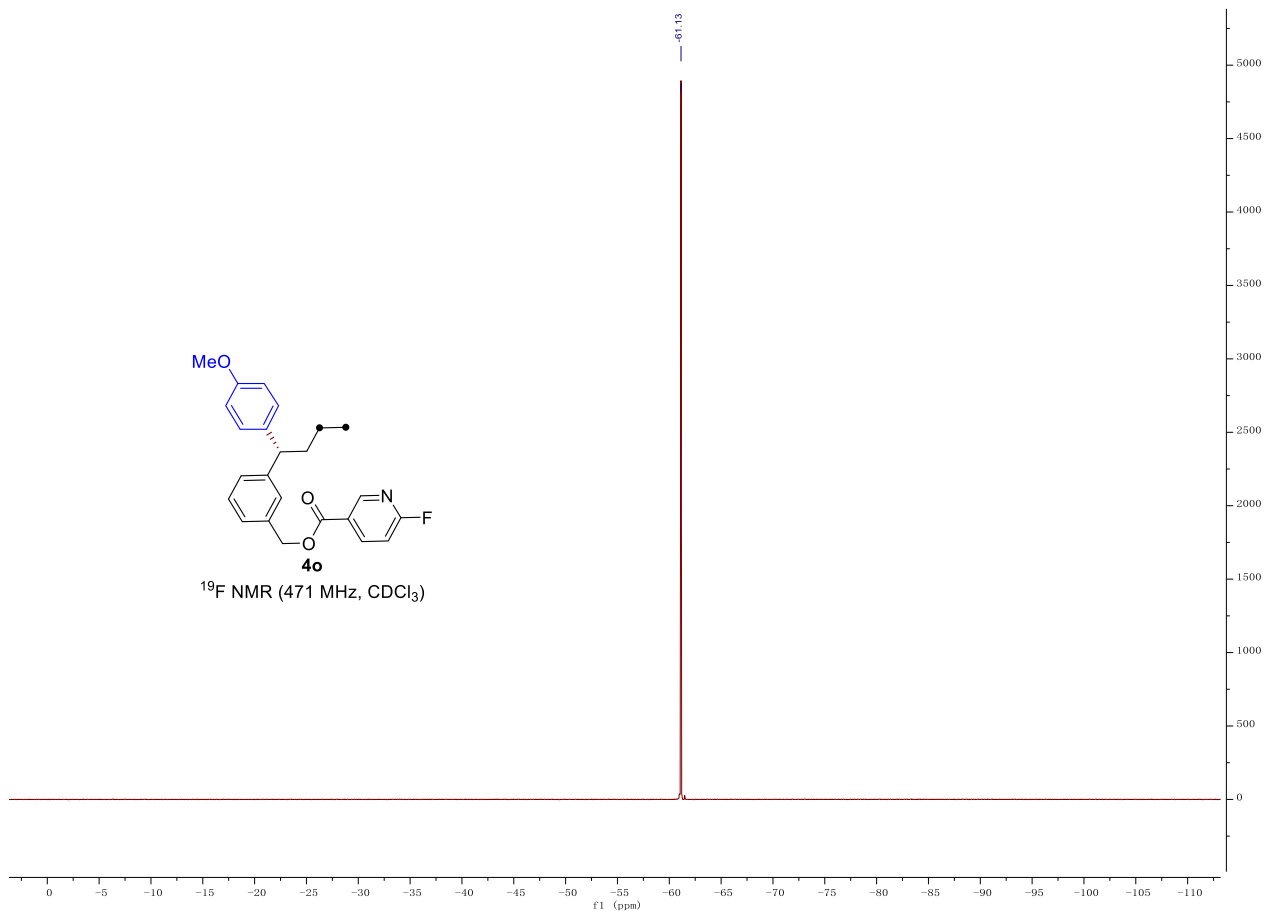

Supplementary Fig. 84. <sup>19</sup>F NMR of compound **4o**

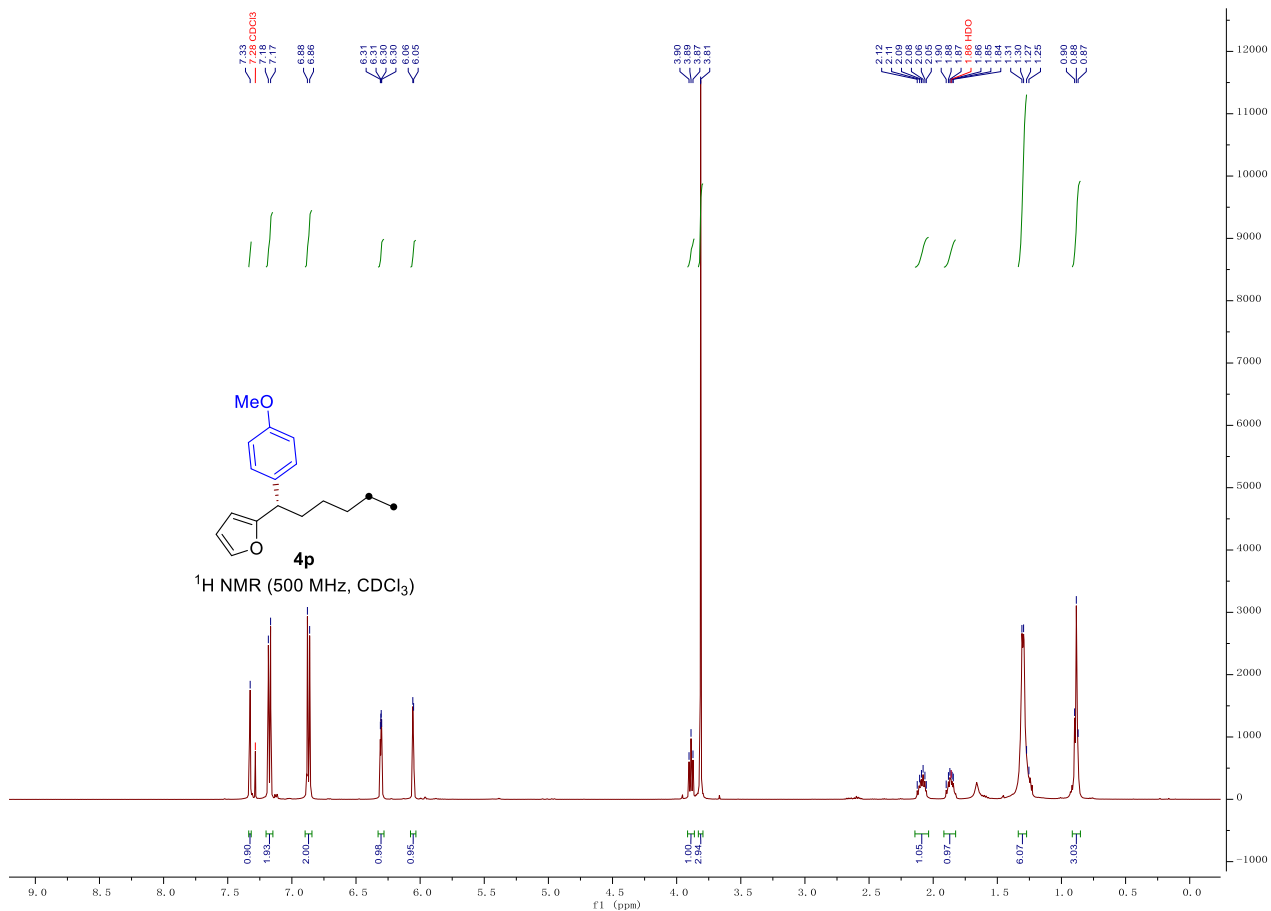

Supplementary Fig. 85. <sup>1</sup>H NMR of compound **4p**

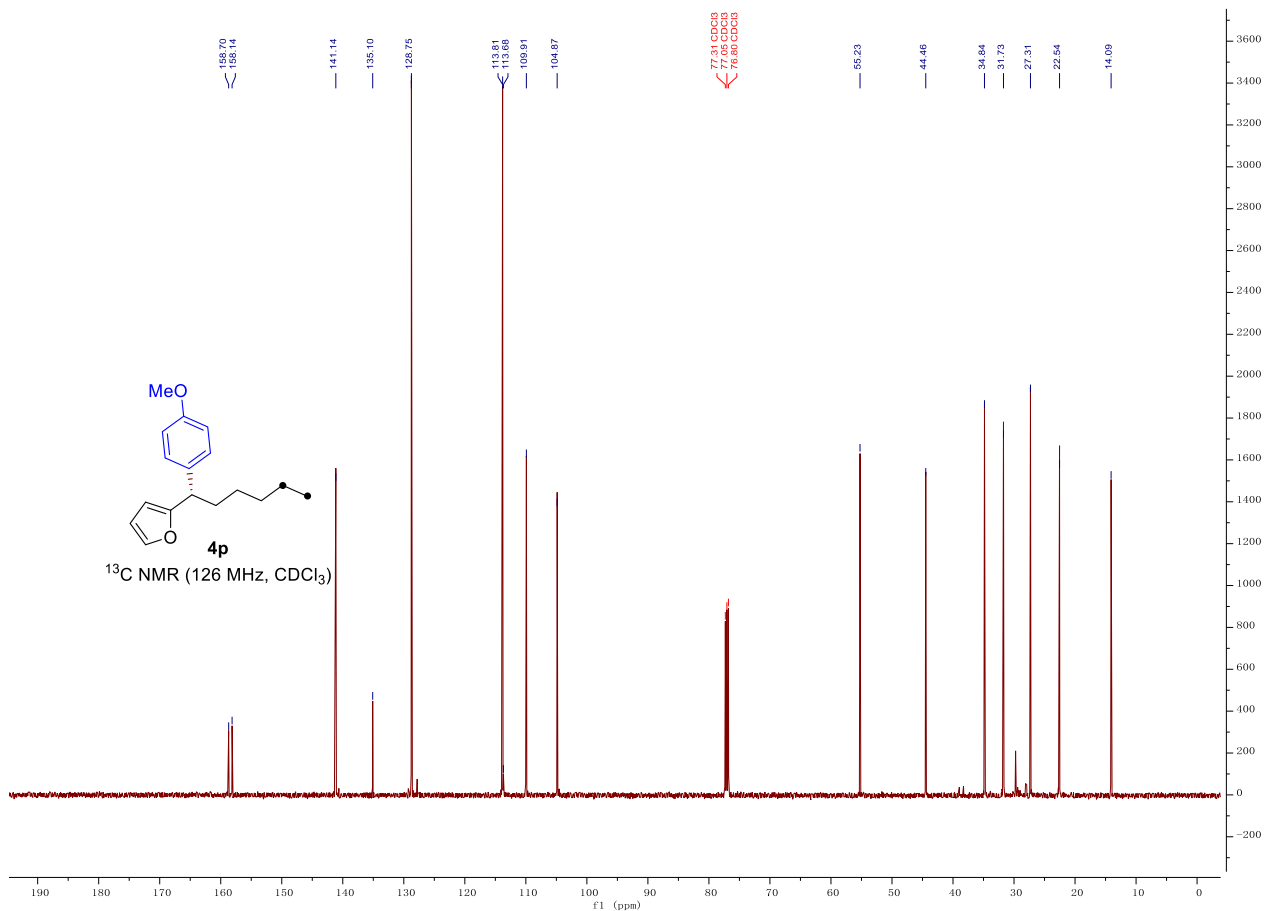

Supplementary Fig. 86. <sup>13</sup>C NMR of compound **4p**

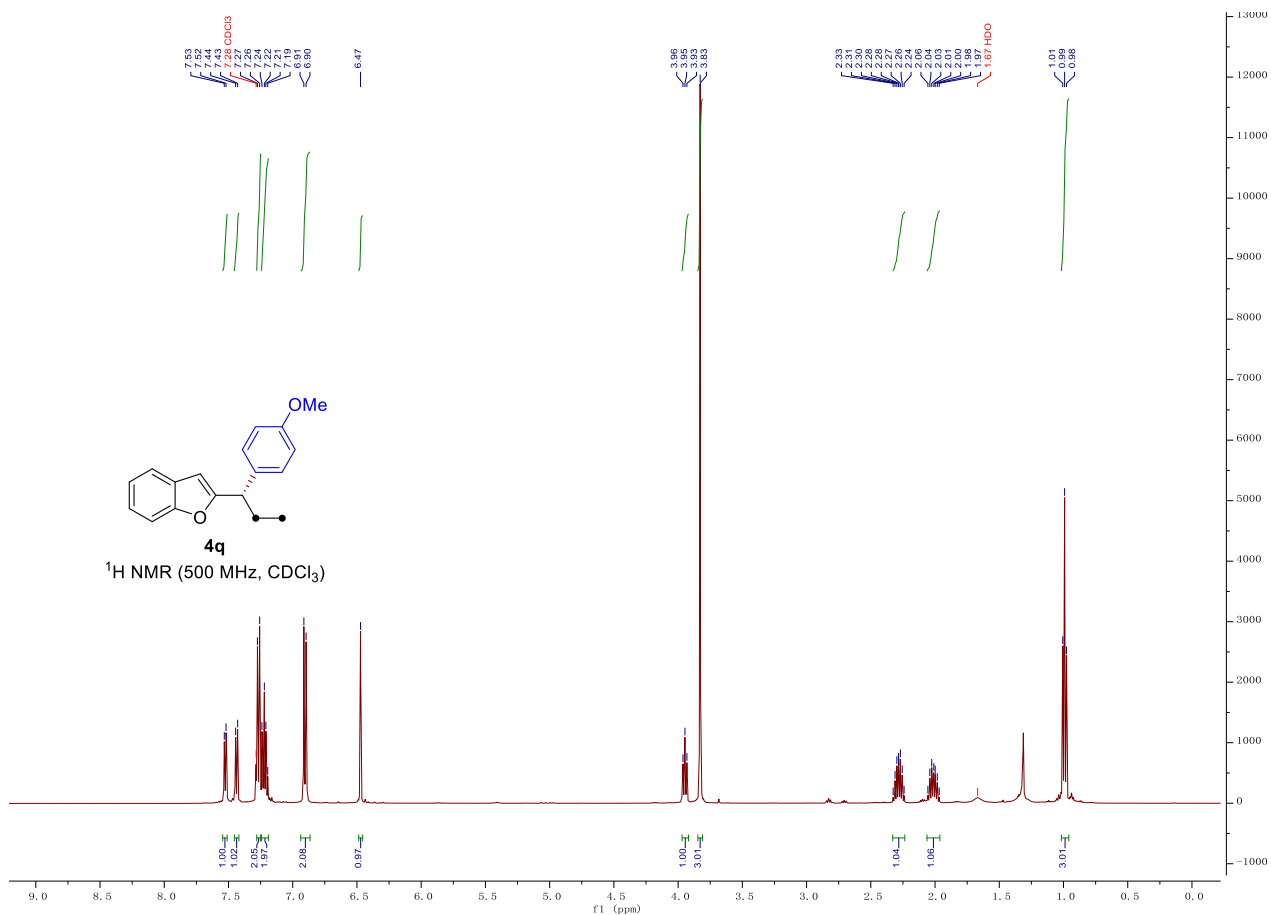

Supplementary Fig. 87. <sup>1</sup>H NMR of compound **4q**

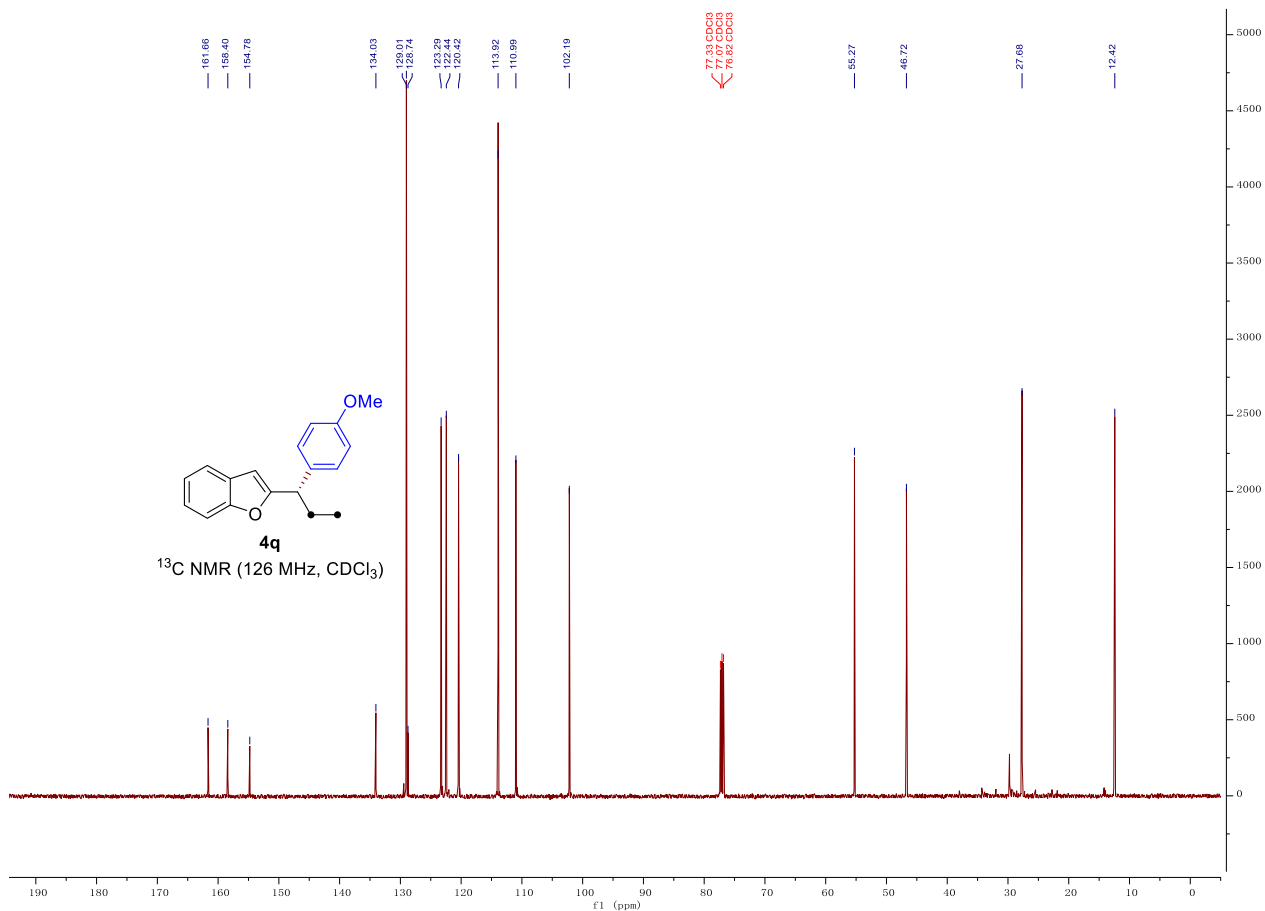

Supplementary Fig. 88.  $^{13}\text{C}$  NMR of compound **4q**

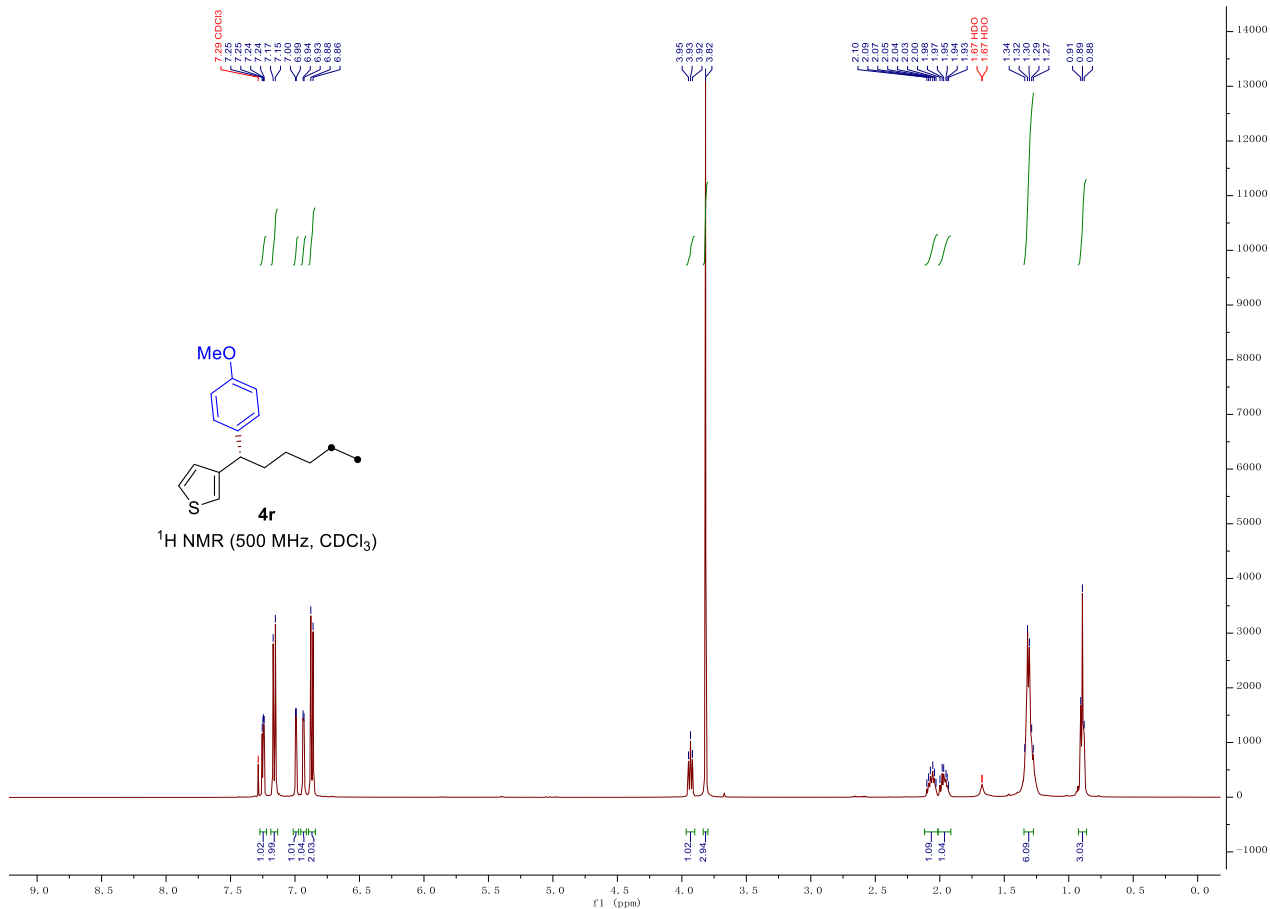

Supplementary Fig. 89.  $^1\text{H}$  NMR of compound **4r**

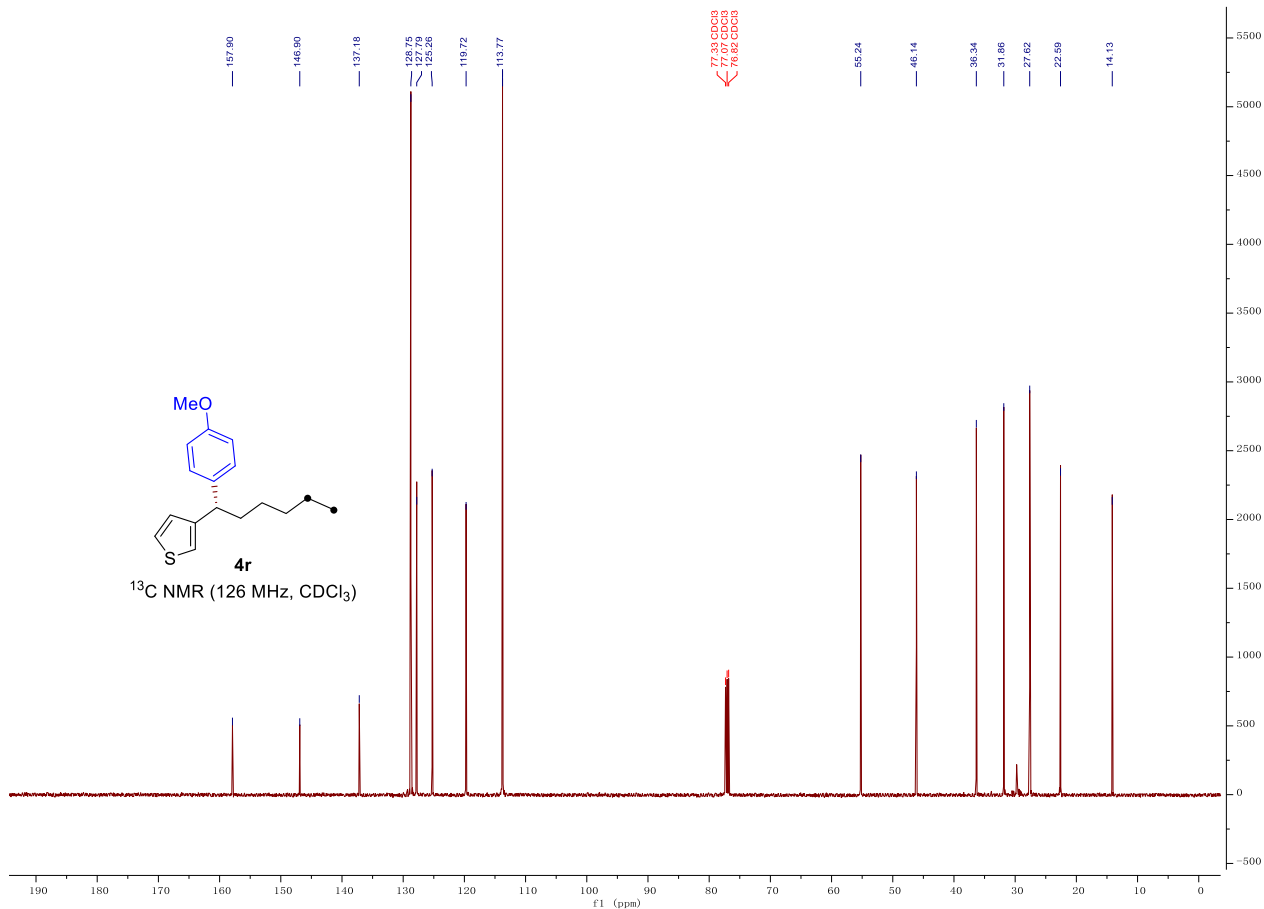

Supplementary Fig. 90. <sup>13</sup>C NMR of compound 4r

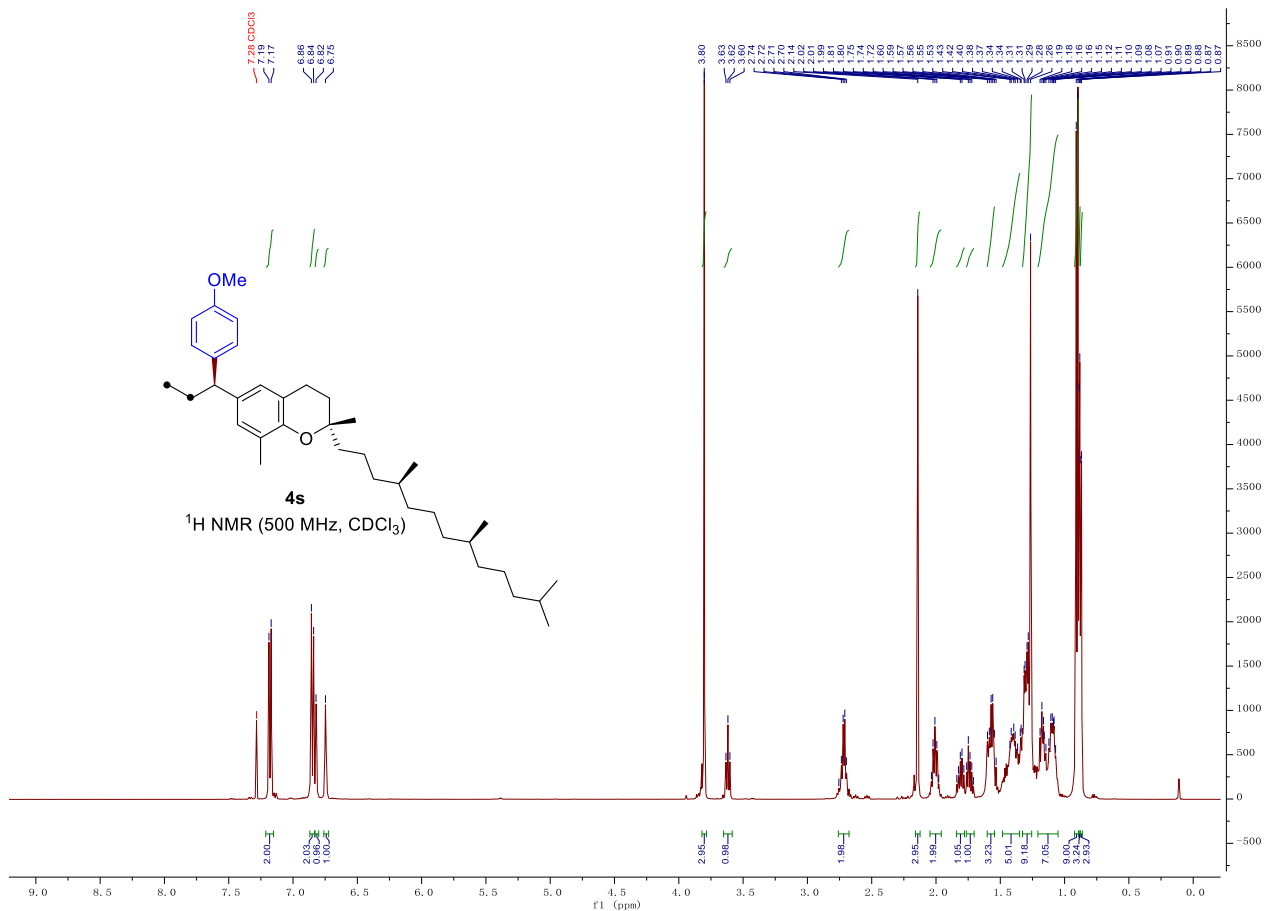

Supplementary Fig. 91. <sup>1</sup>H NMR of compound 4s



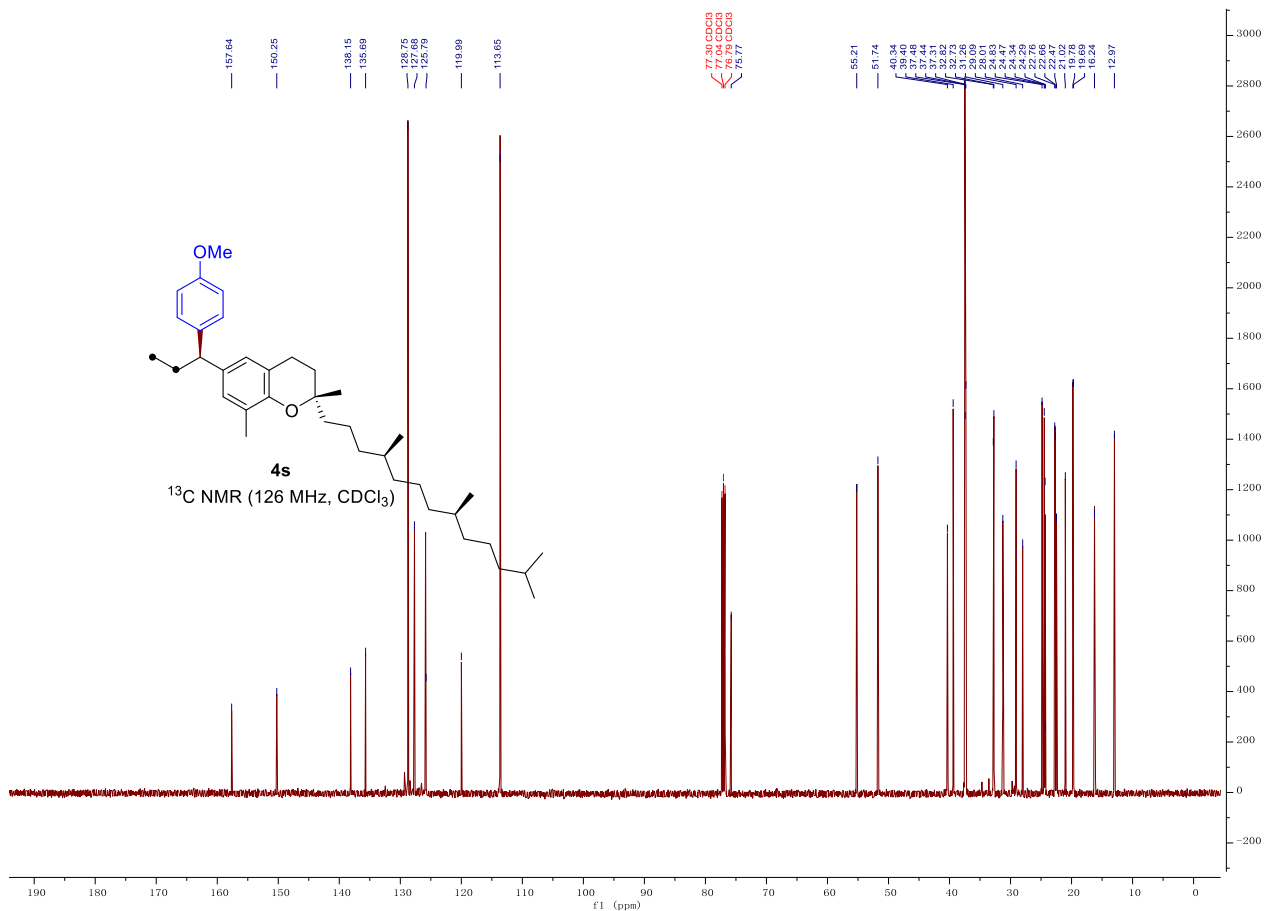

Supplementary Fig. 92.  $^{13}\text{C}$  NMR of compound **4s**

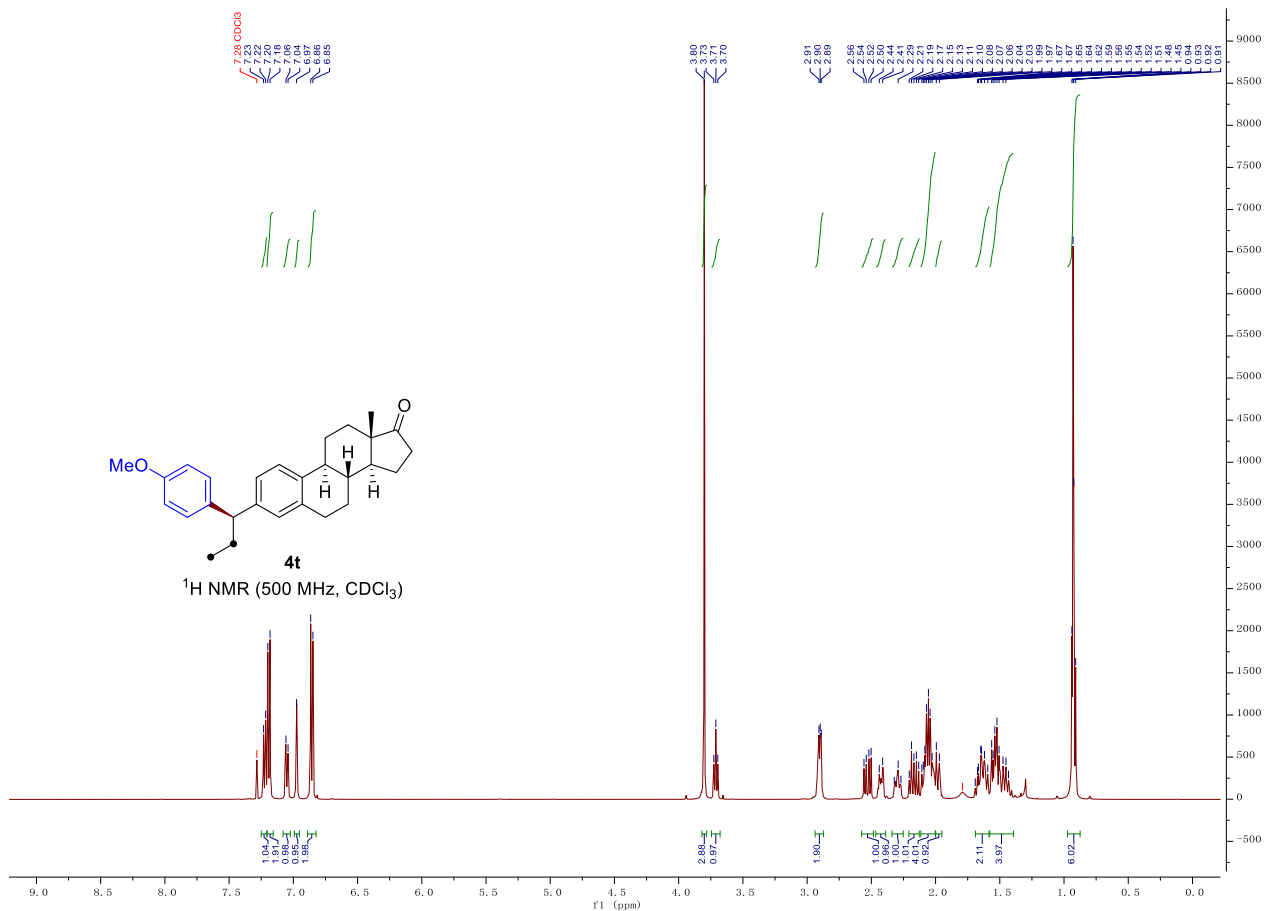

Supplementary Fig. 93.  $^1\text{H}$  NMR of compound **4t**

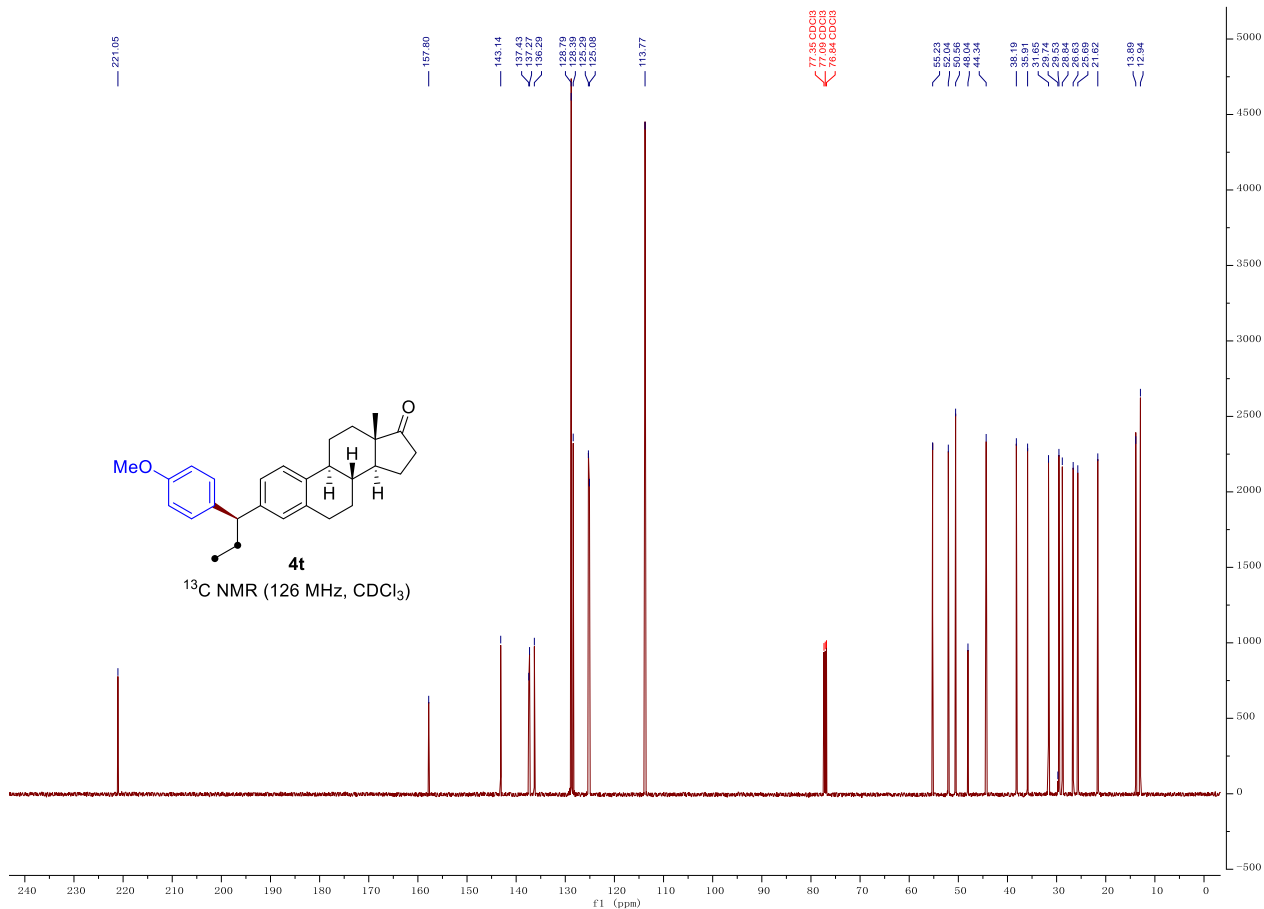

Supplementary Fig. 94. <sup>13</sup>C NMR of compound **4t**

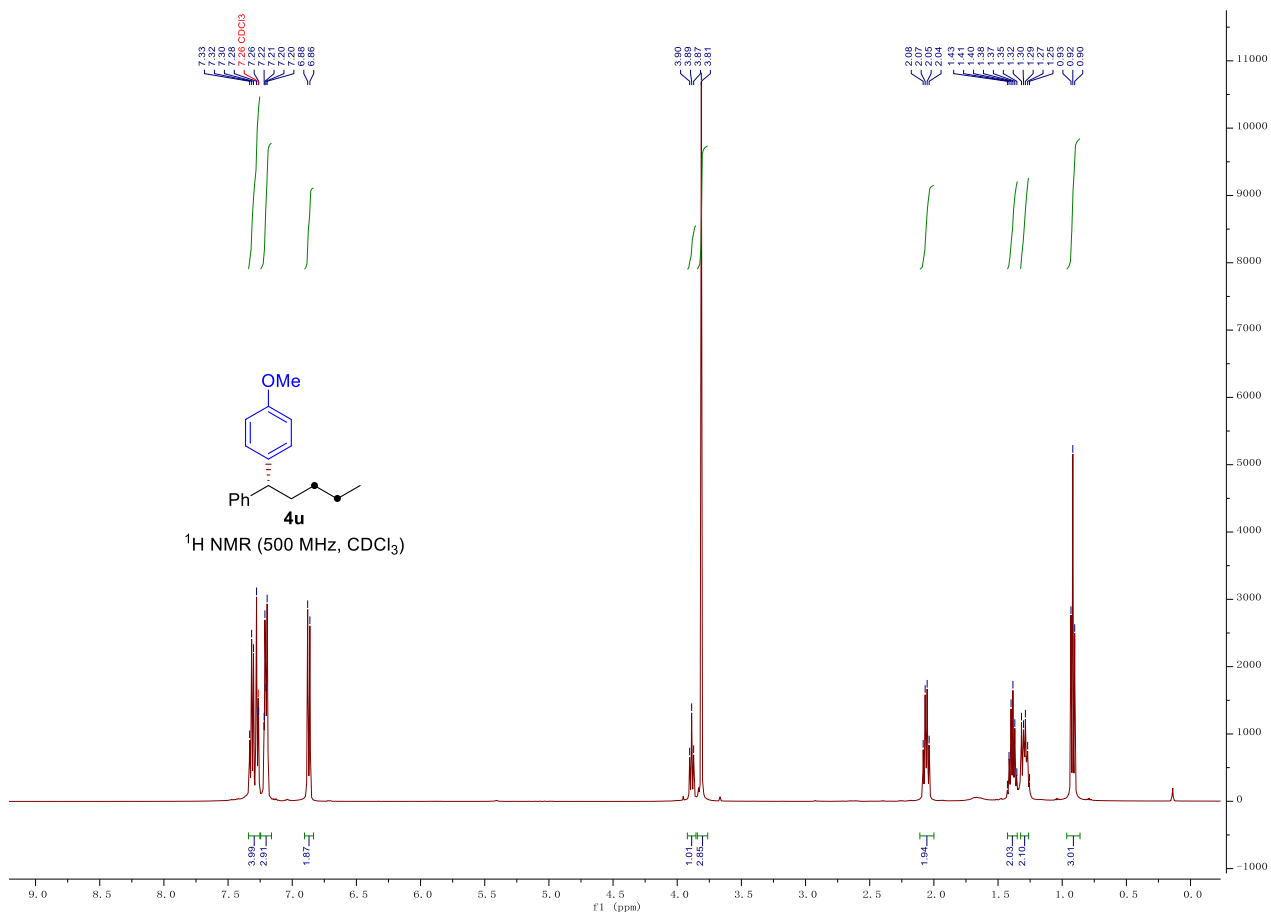

Supplementary Fig. 95. <sup>1</sup>H NMR of compound **4u**

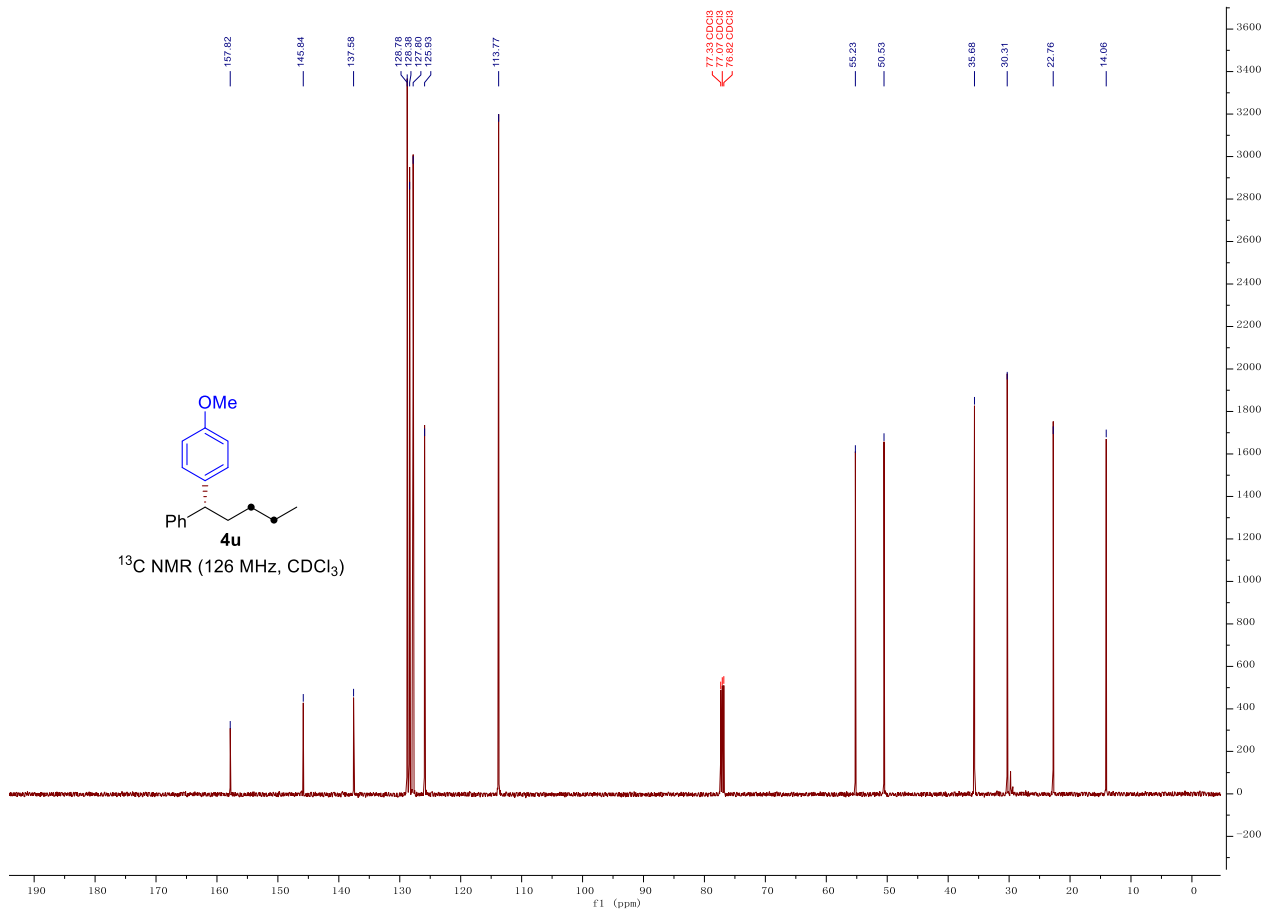

Supplementary Fig. 96. <sup>13</sup>C NMR of compound **4u**

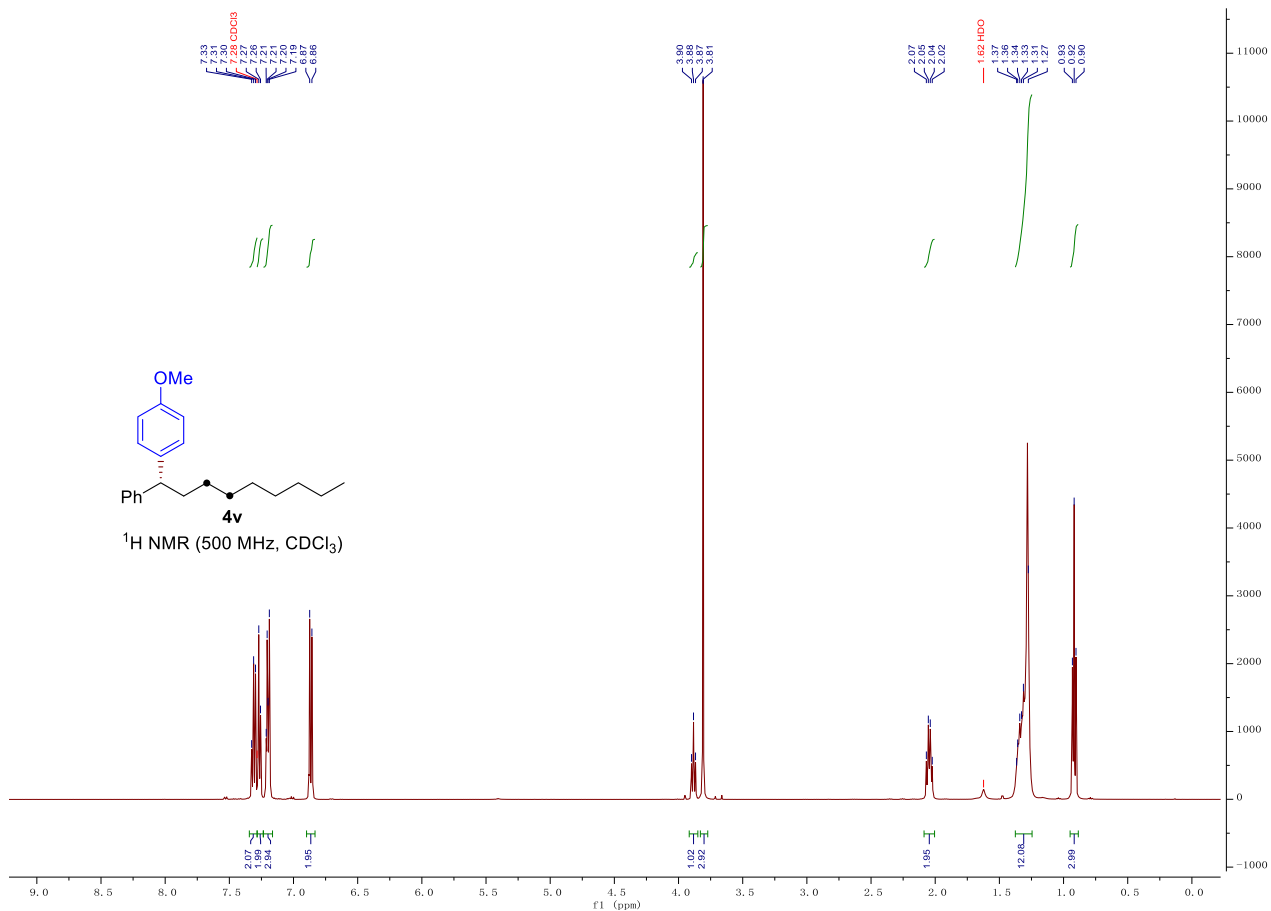

Supplementary Fig. 97. <sup>1</sup>H NMR of compound **4v**

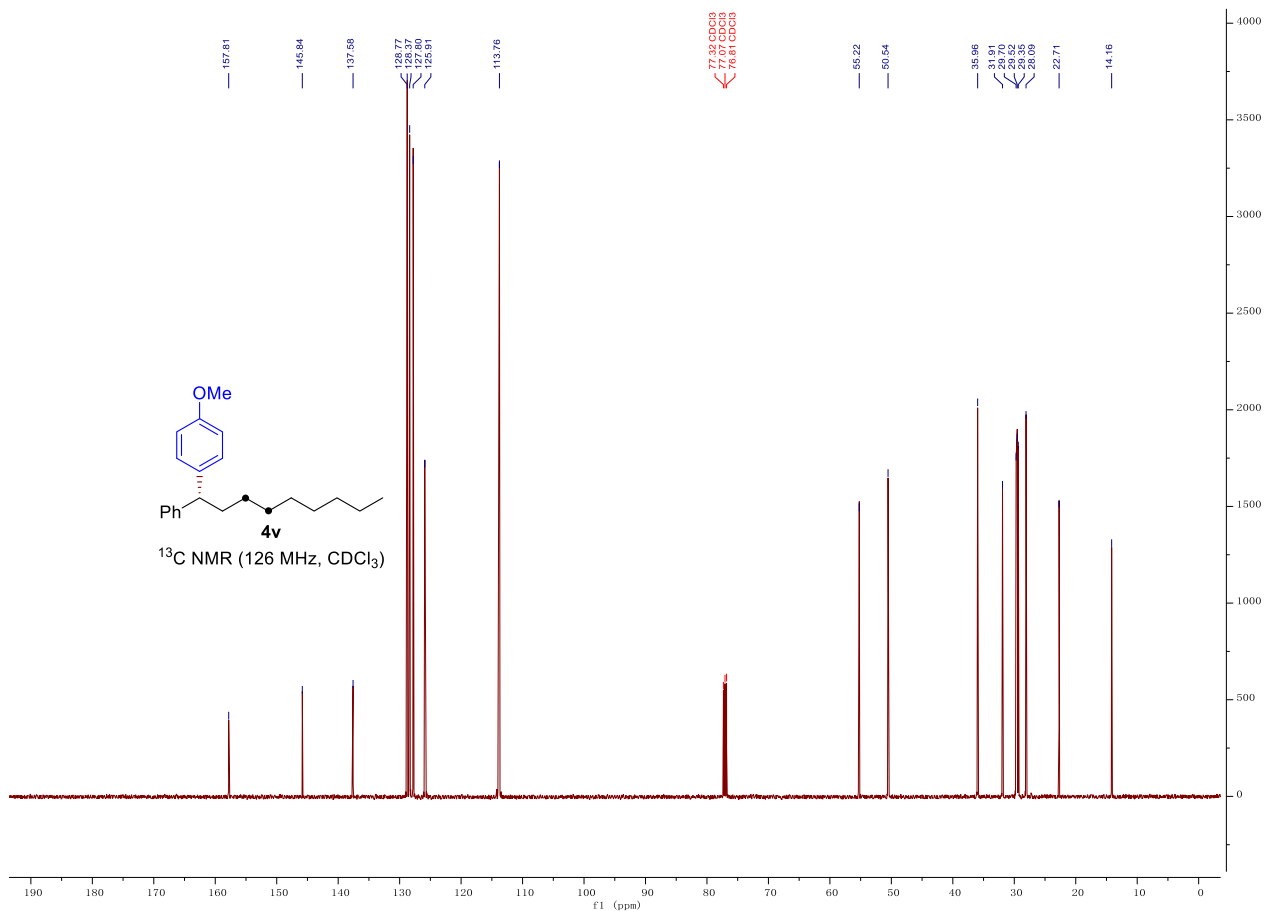

Supplementary Fig. 98. <sup>13</sup>C NMR of compound **4v**

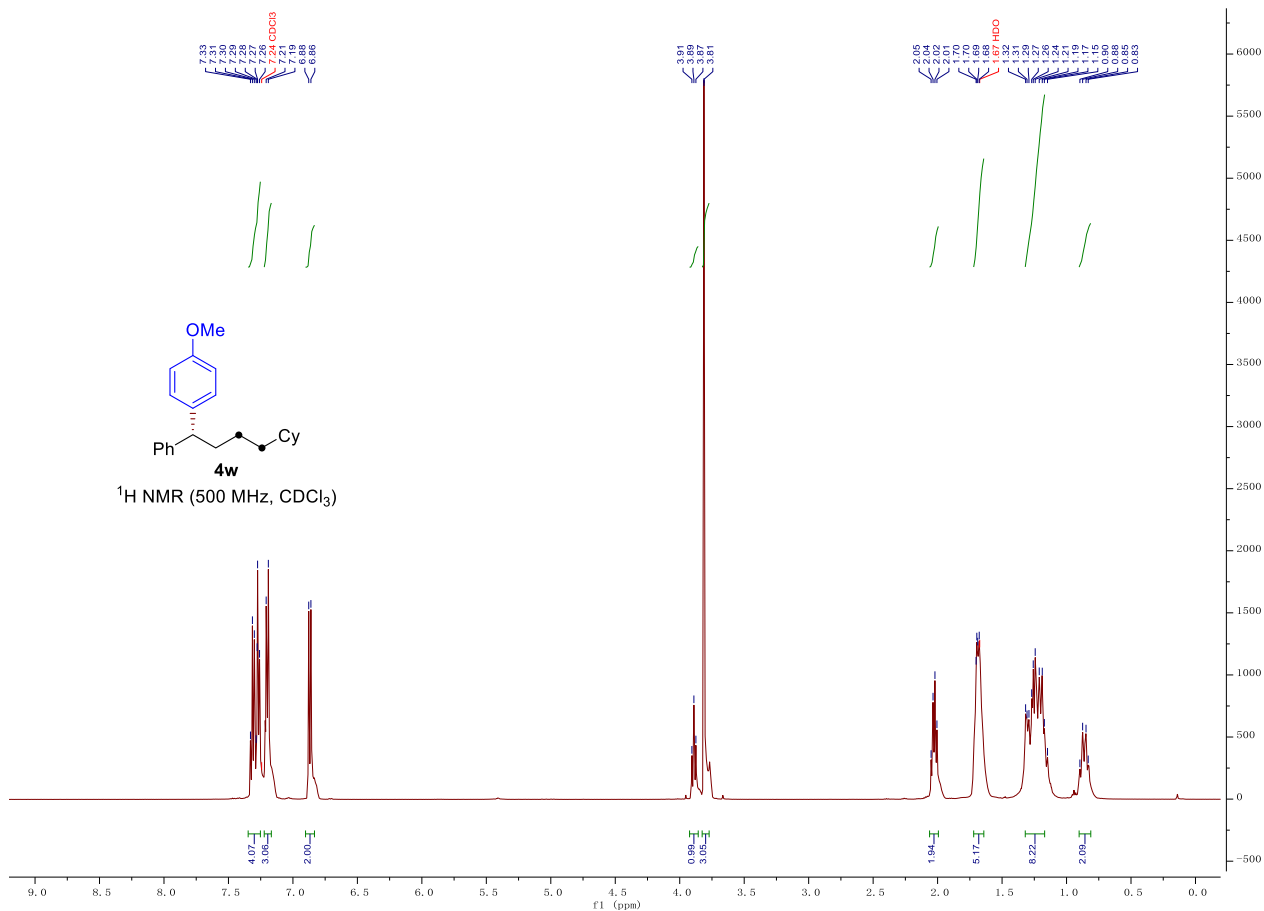

Supplementary Fig. 99. <sup>1</sup>H NMR of compound **4w**

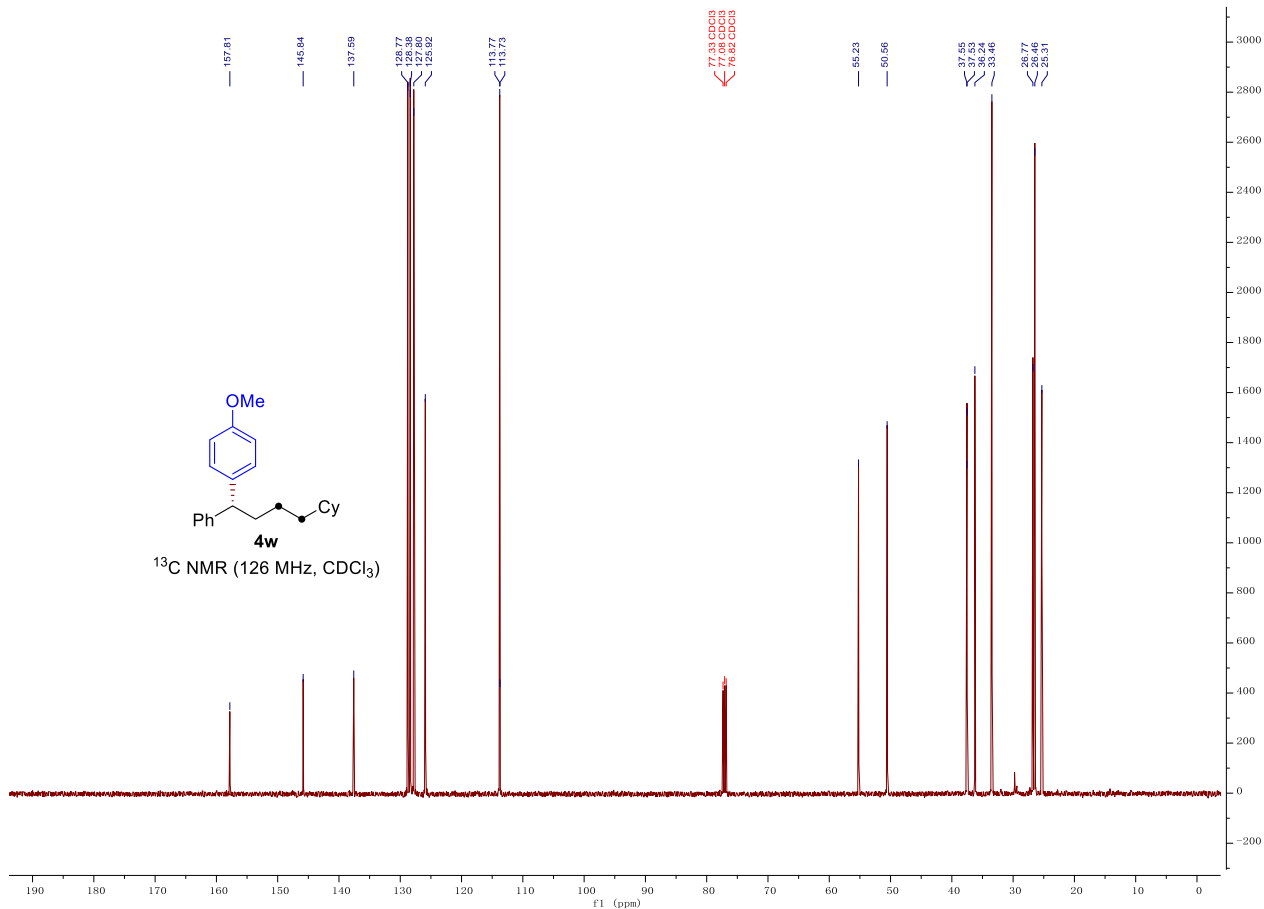

Supplementary Fig. 100. <sup>13</sup>C NMR of compound **4w**

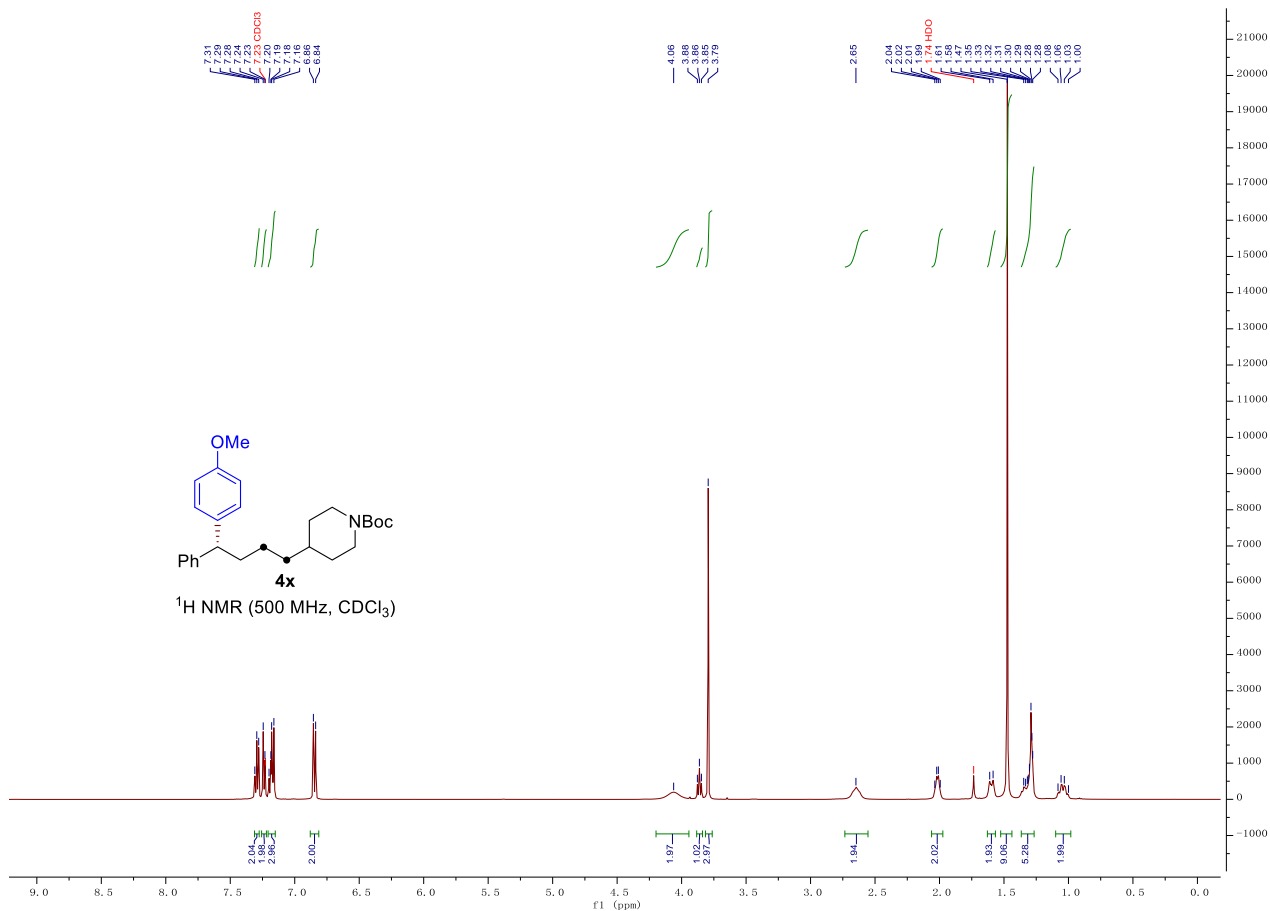

Supplementary Fig. 101. <sup>1</sup>H NMR of compound **4x**

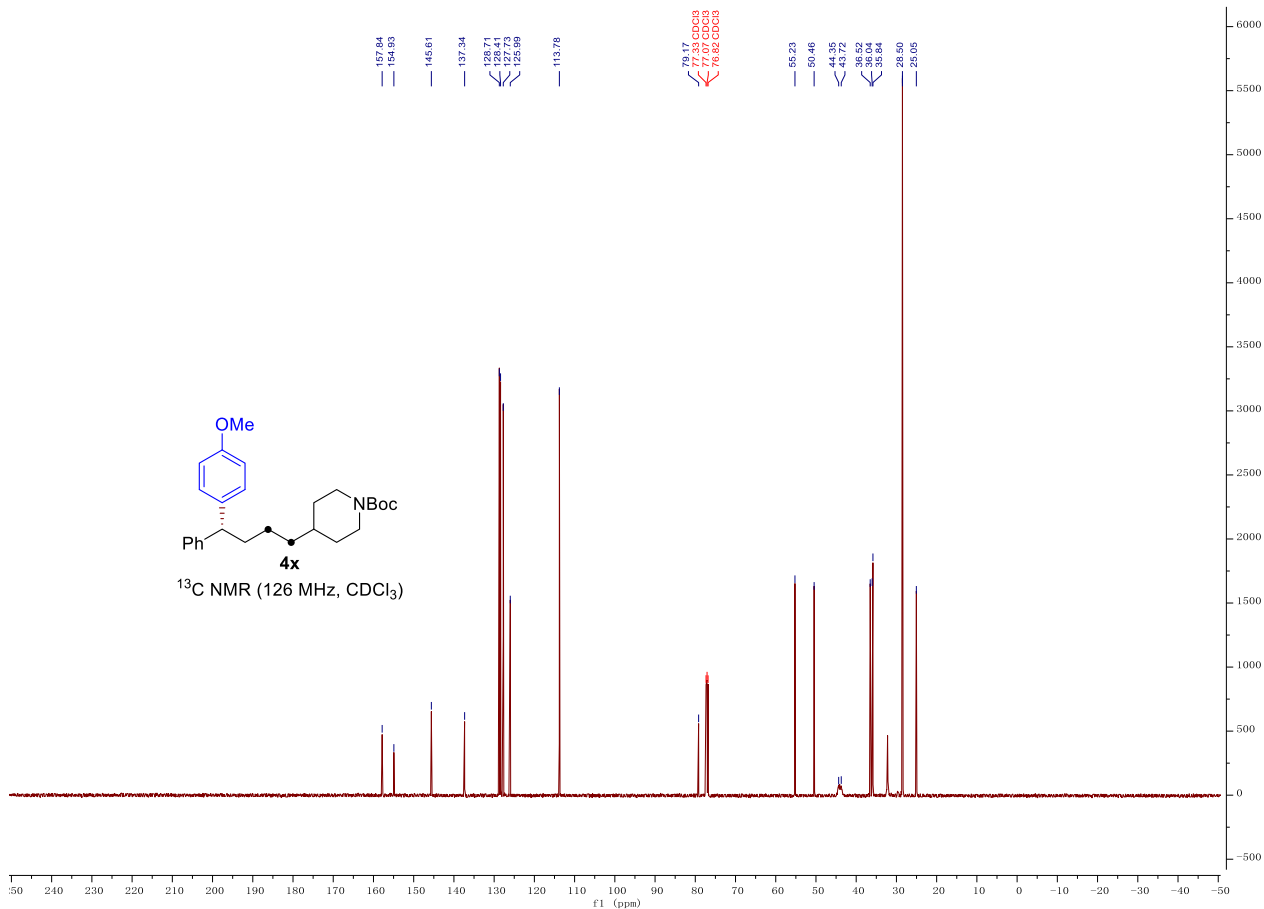

**Supplementary Fig. 102.** <sup>13</sup>C NMR of compound **4x**

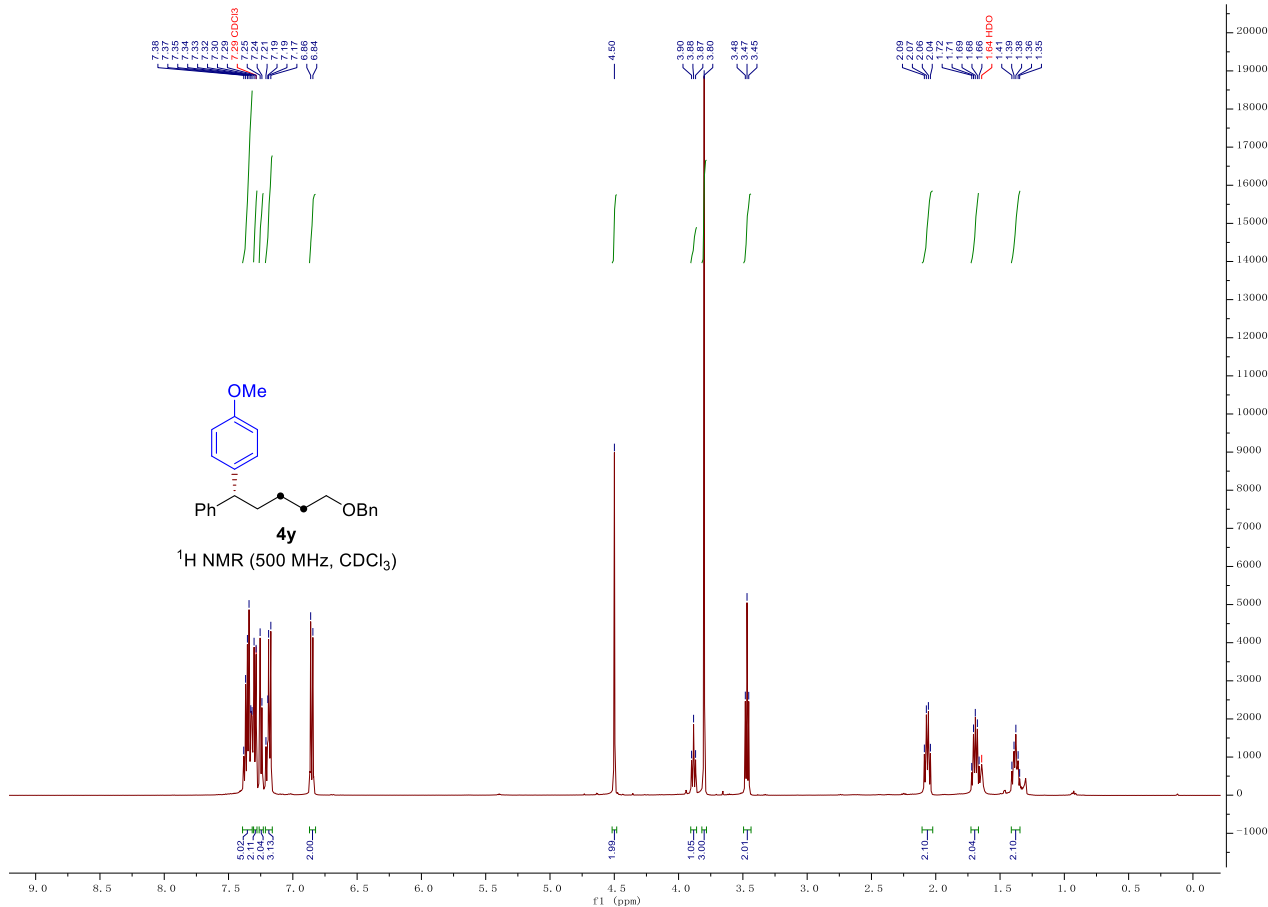

**Supplementary Fig. 103.** <sup>1</sup>H NMR of compound **4y**

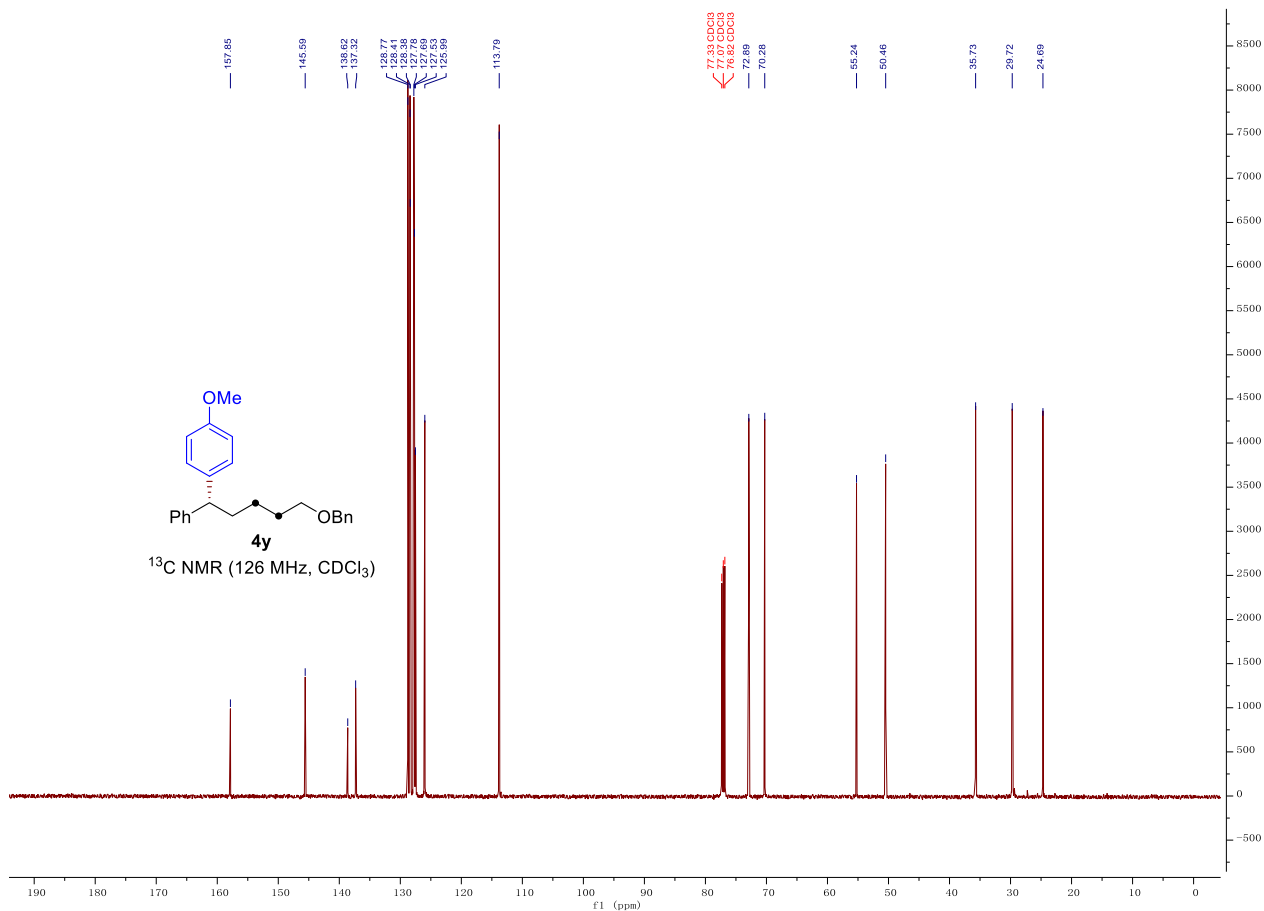

Supplementary Fig. 104. <sup>13</sup>C NMR of compound **4y**

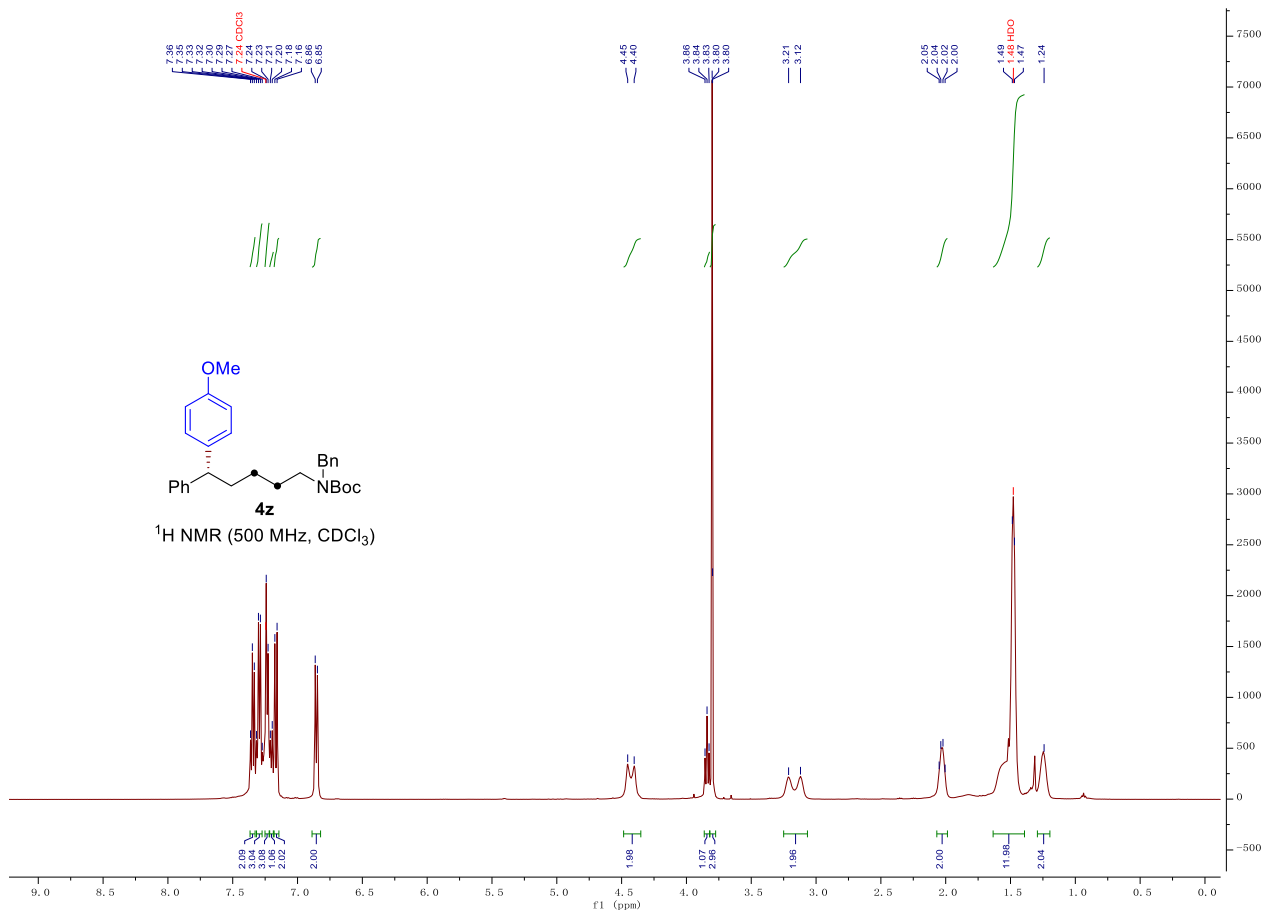

Supplementary Fig. 105. <sup>1</sup>H NMR of compound **4z**

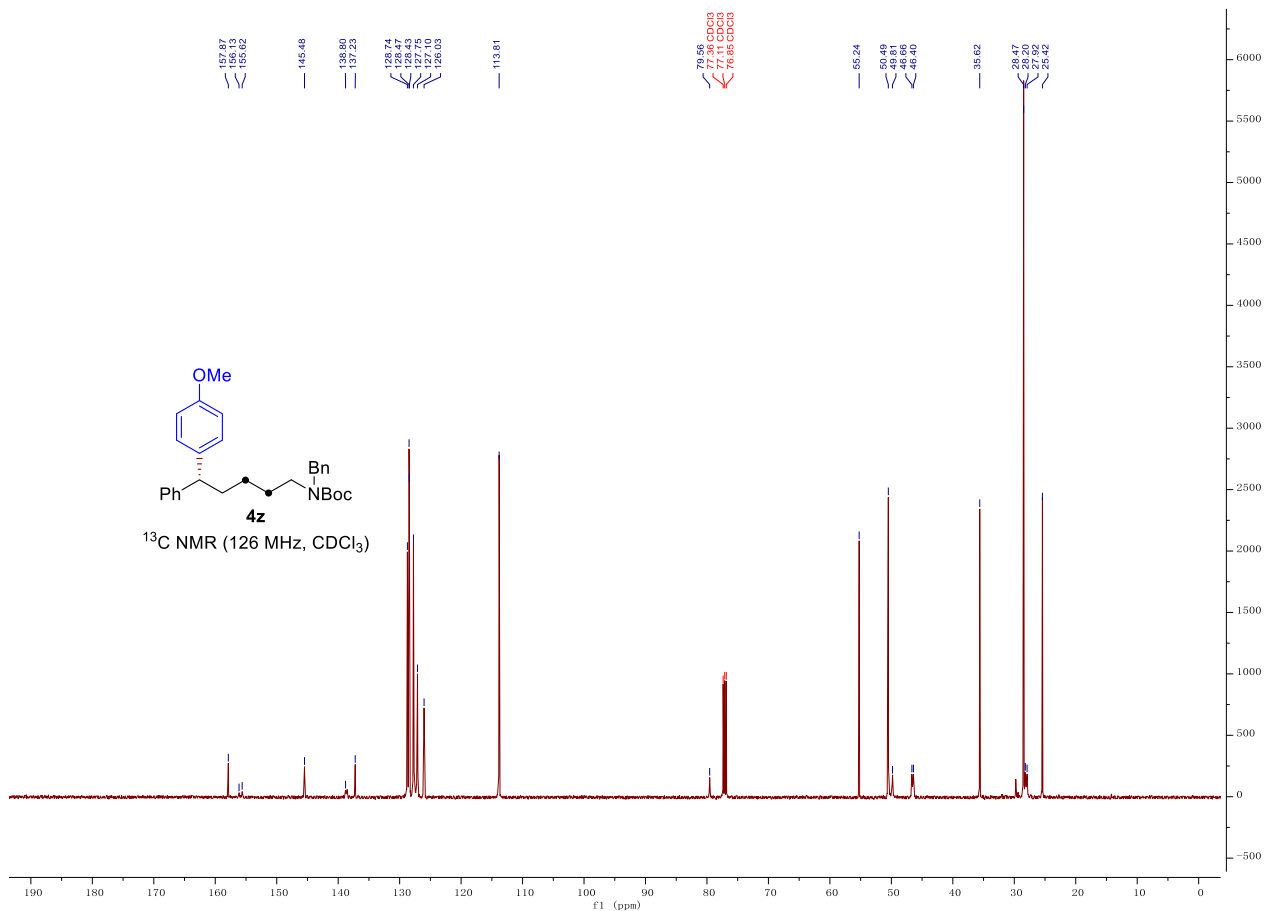

Supplementary Fig. 106. <sup>13</sup>C NMR of compound **4z**

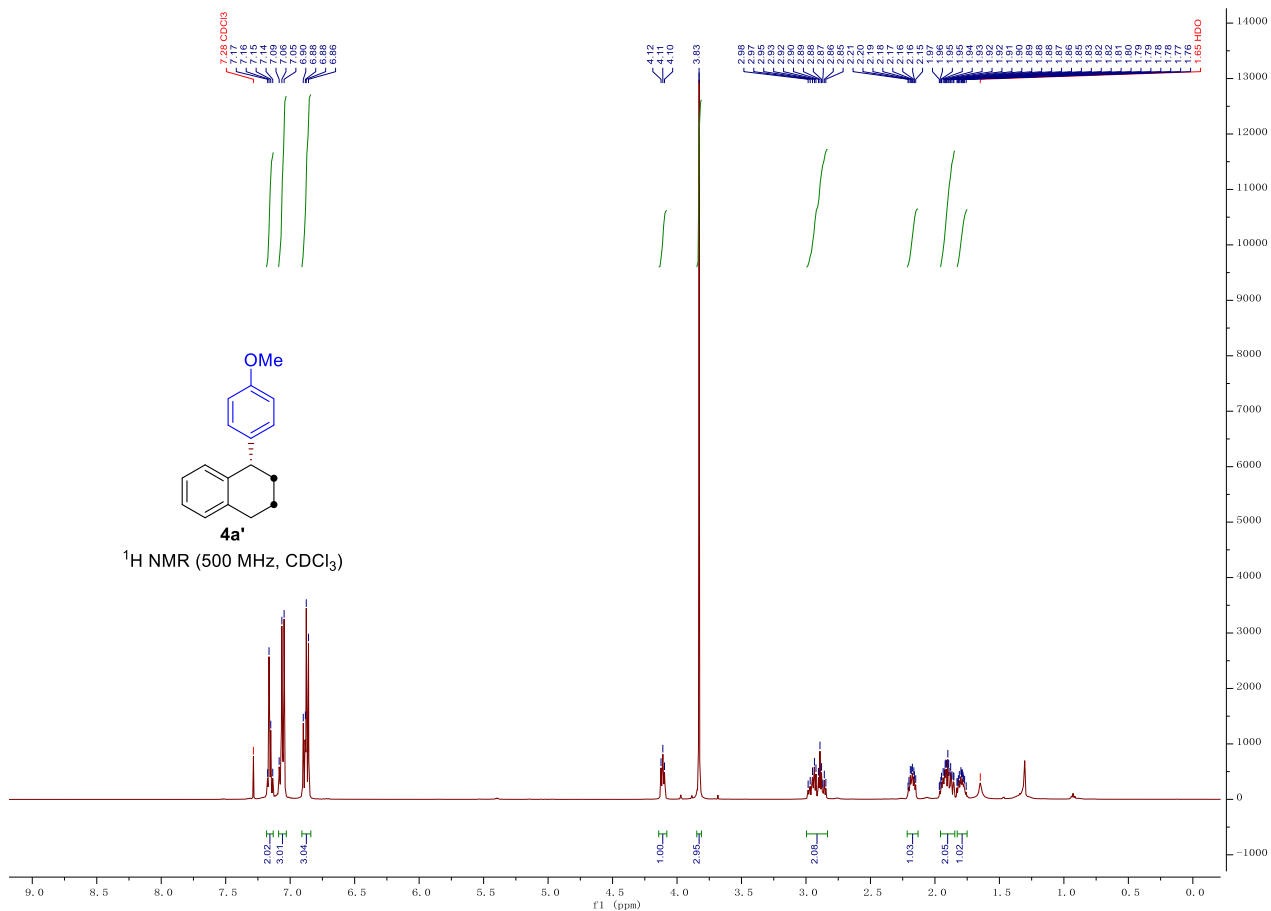

Supplementary Fig. 107. <sup>1</sup>H NMR of compound **4a'**



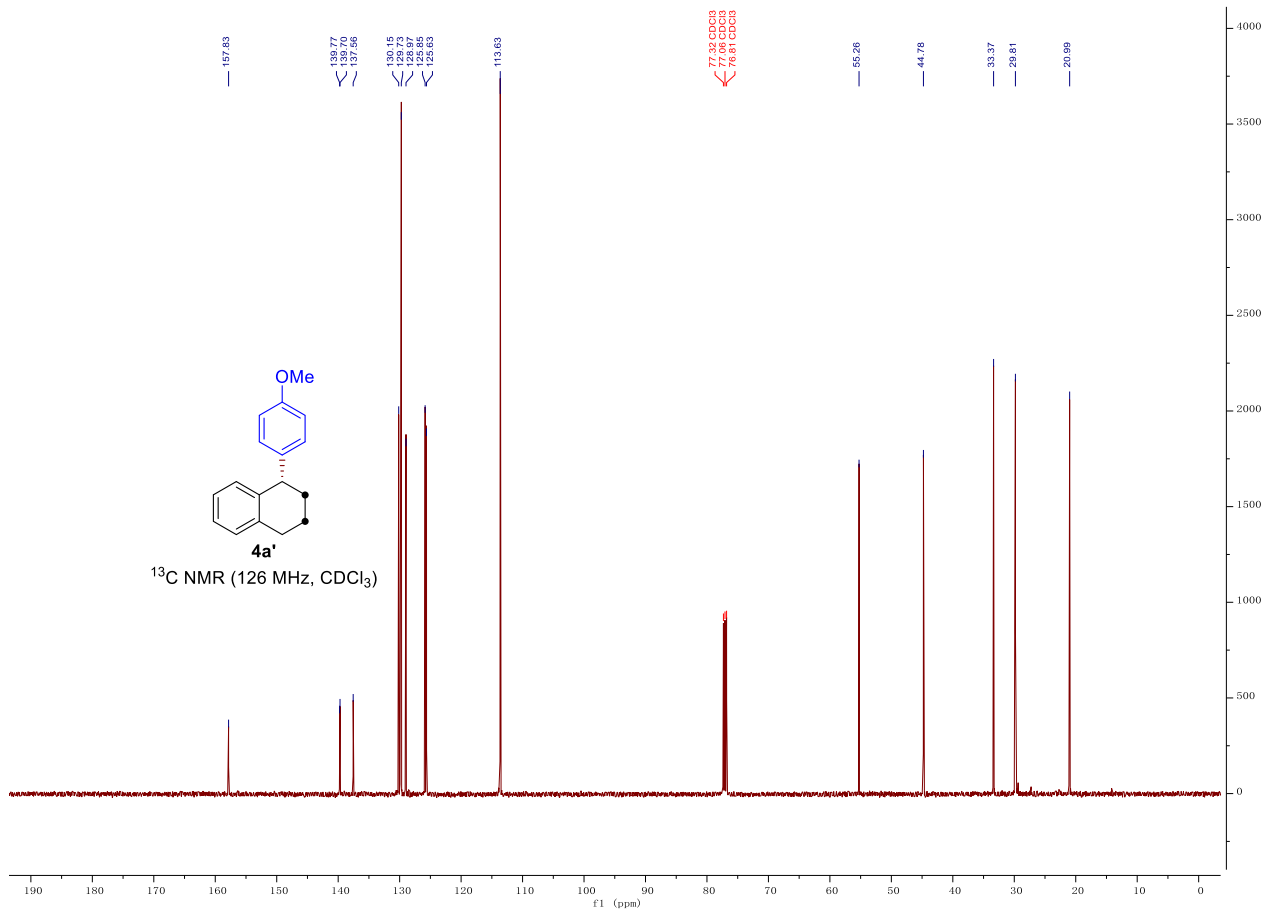

Supplementary Fig. 108. <sup>13</sup>C NMR of compound **4a'**

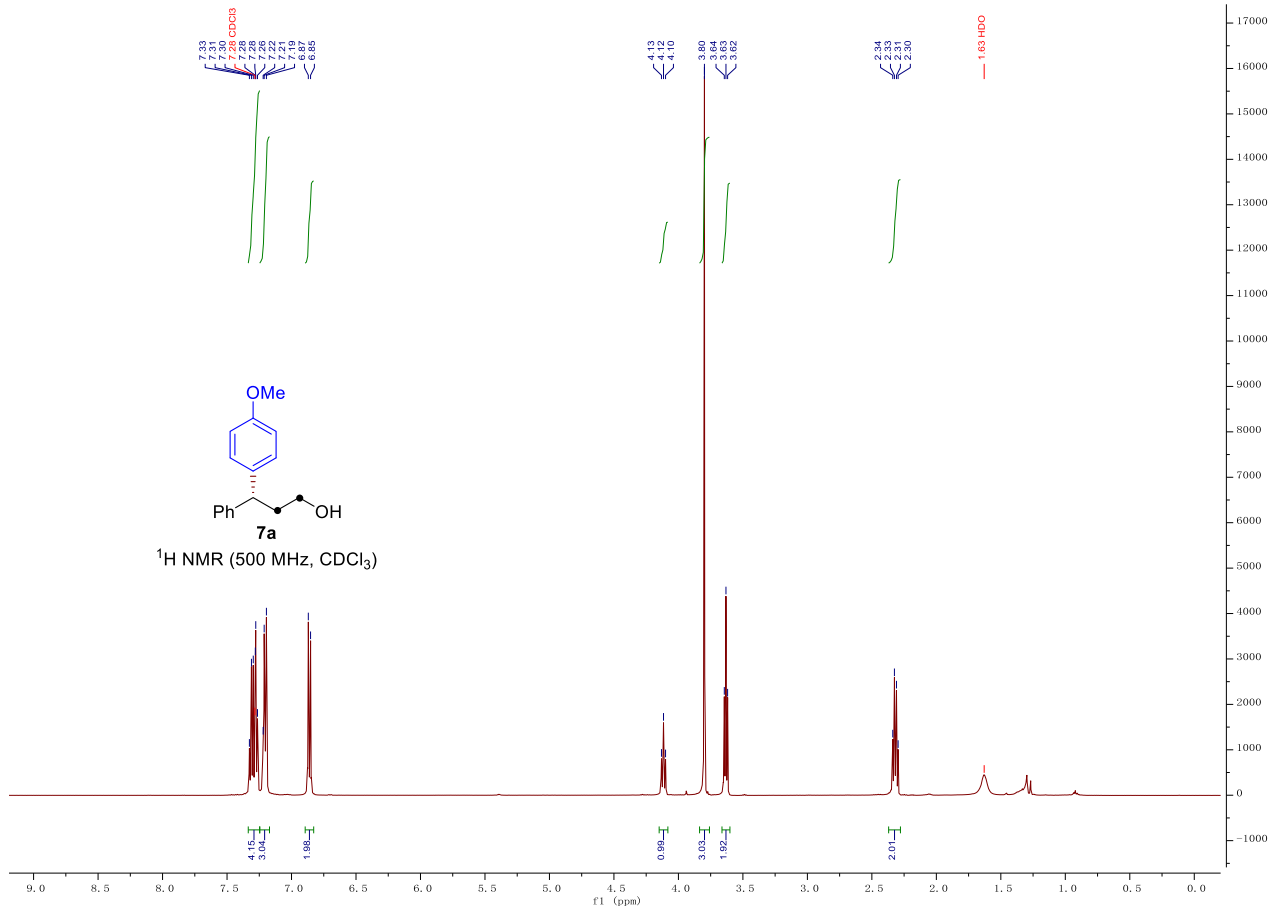

Supplementary Fig. 109. <sup>1</sup>H NMR of compound **7a**

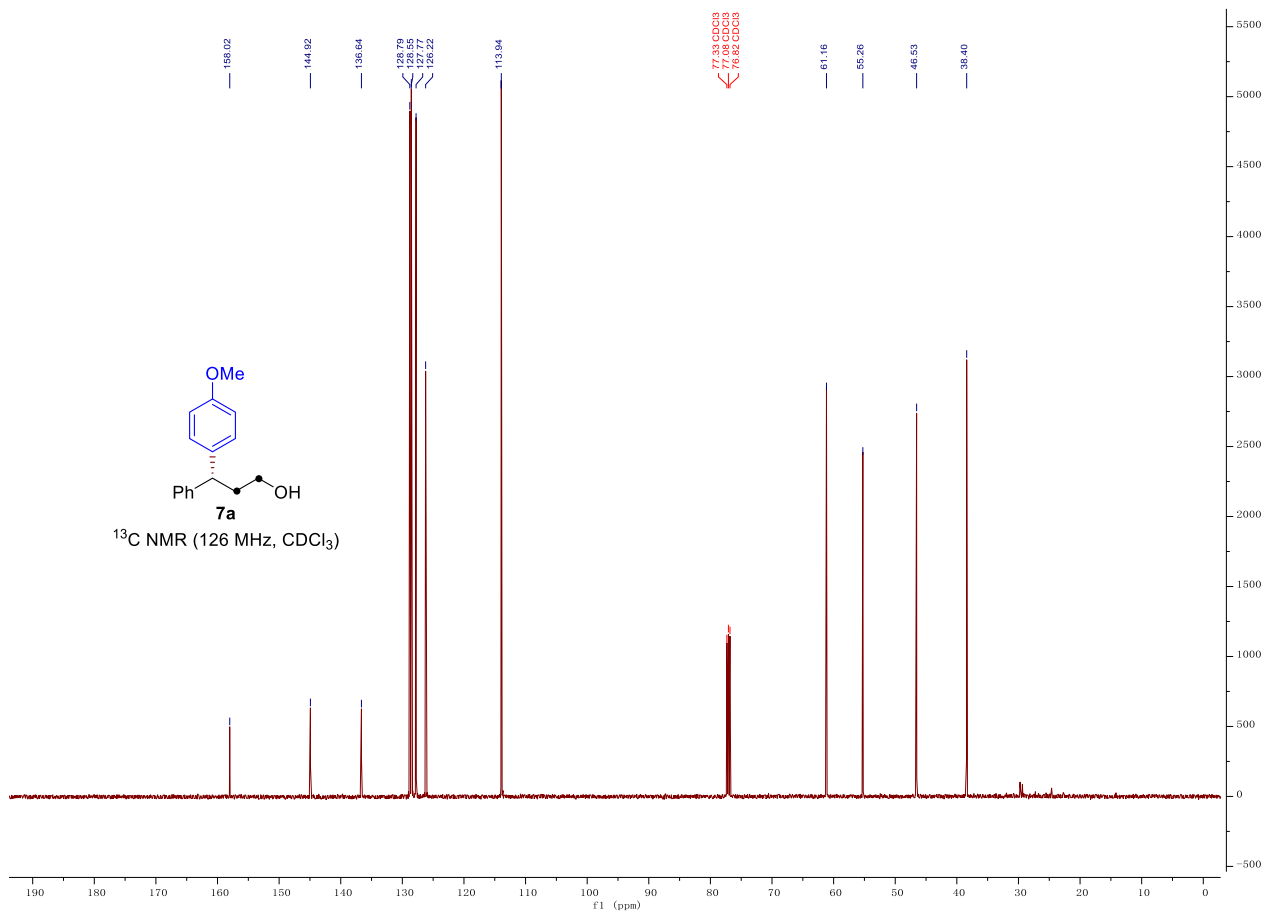

**Supplementary Fig. 110.** <sup>13</sup>C NMR of compound **7a**

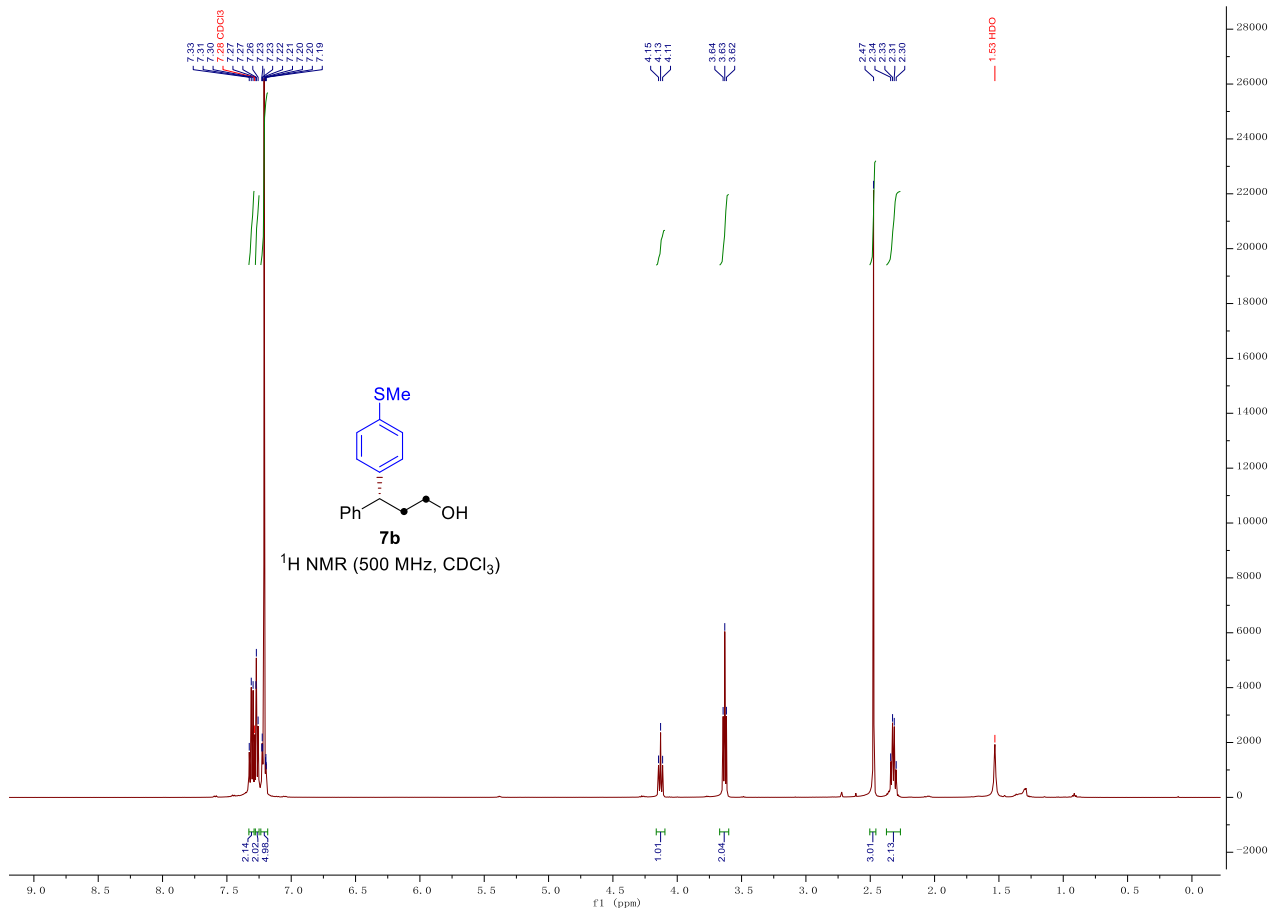

**Supplementary Fig. 111.** <sup>1</sup>H NMR of compound **7b**

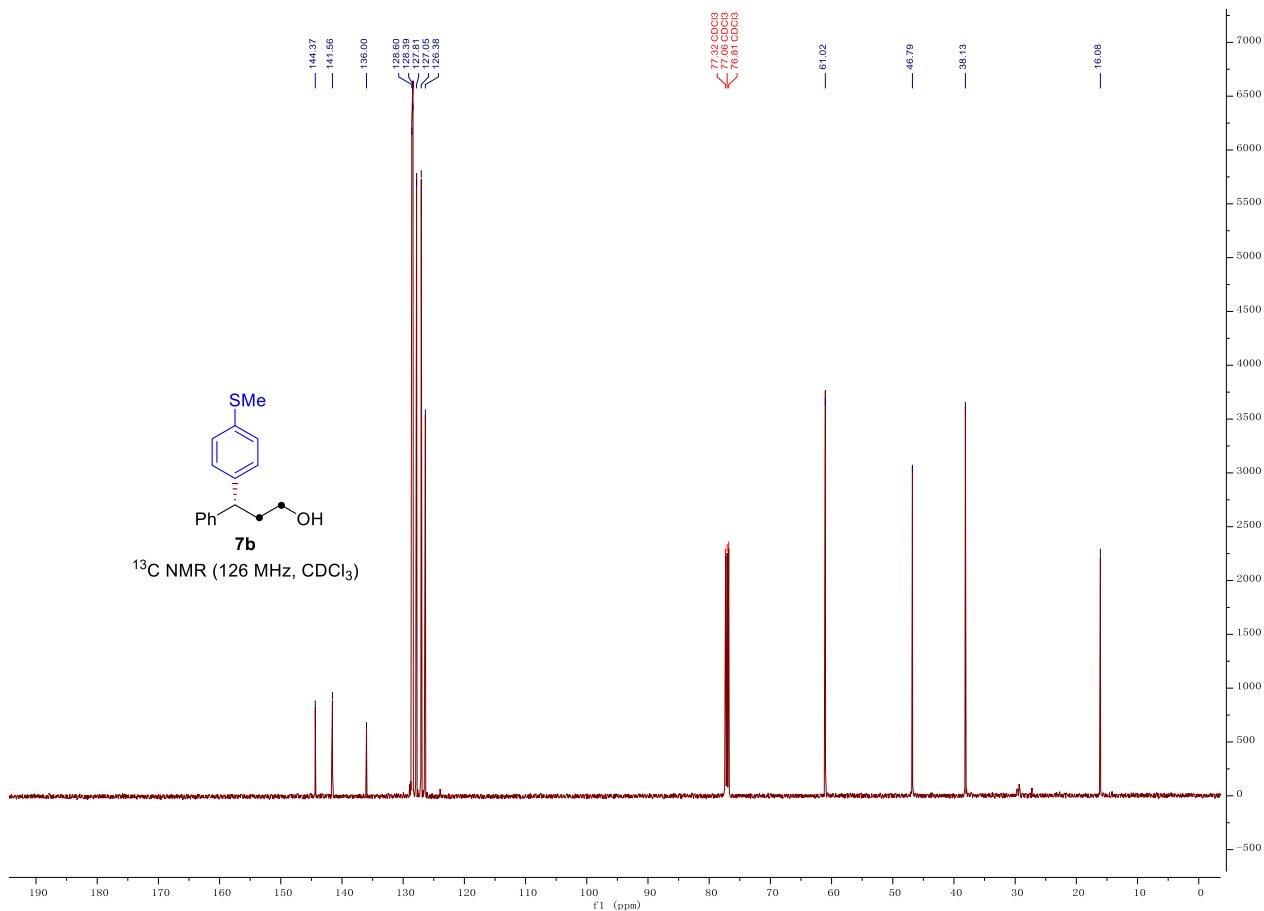

Supplementary Fig. 112.  $^{13}\text{C}$  NMR of compound **7b**

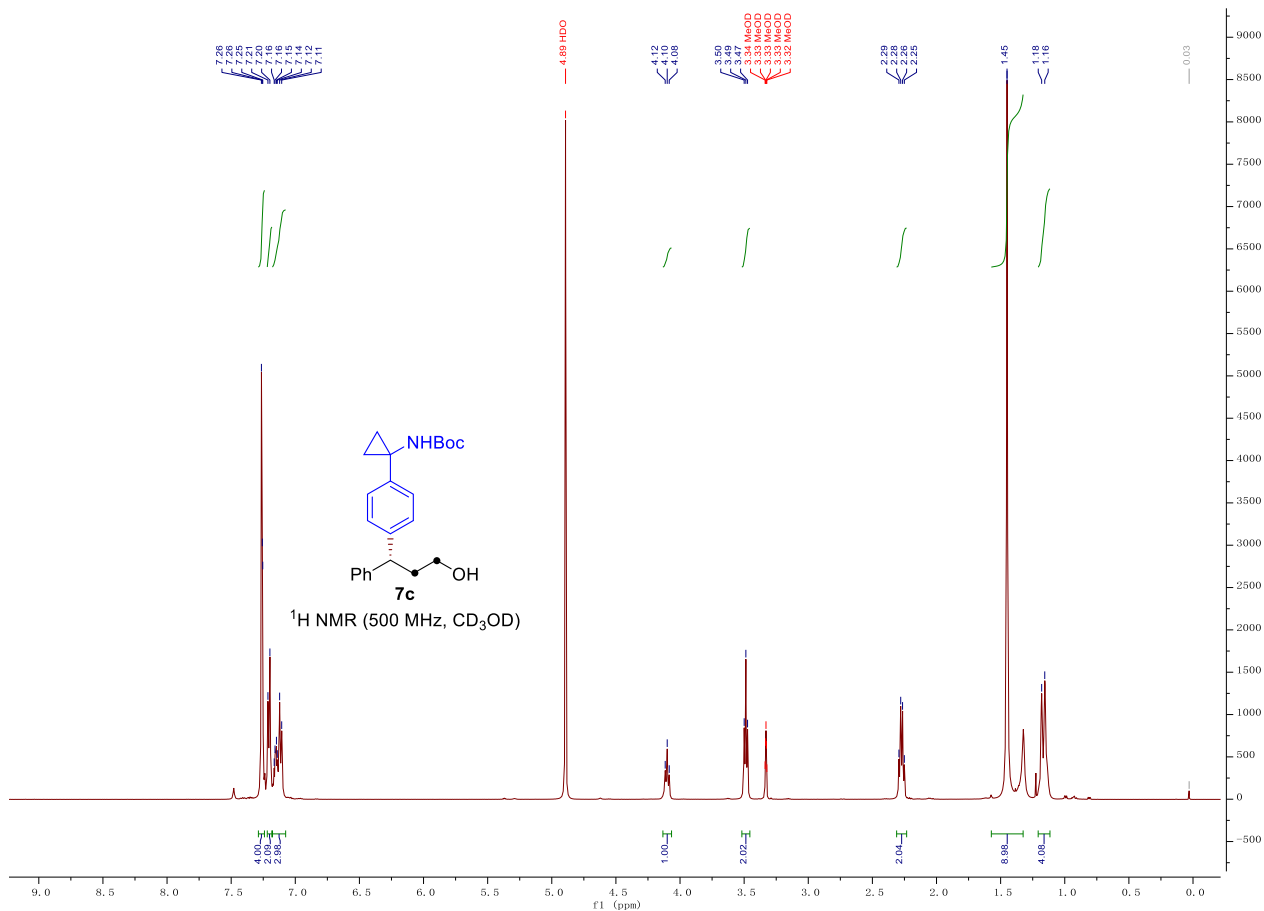

Supplementary Fig. 113.  $^1\text{H}$  NMR of compound **7c**

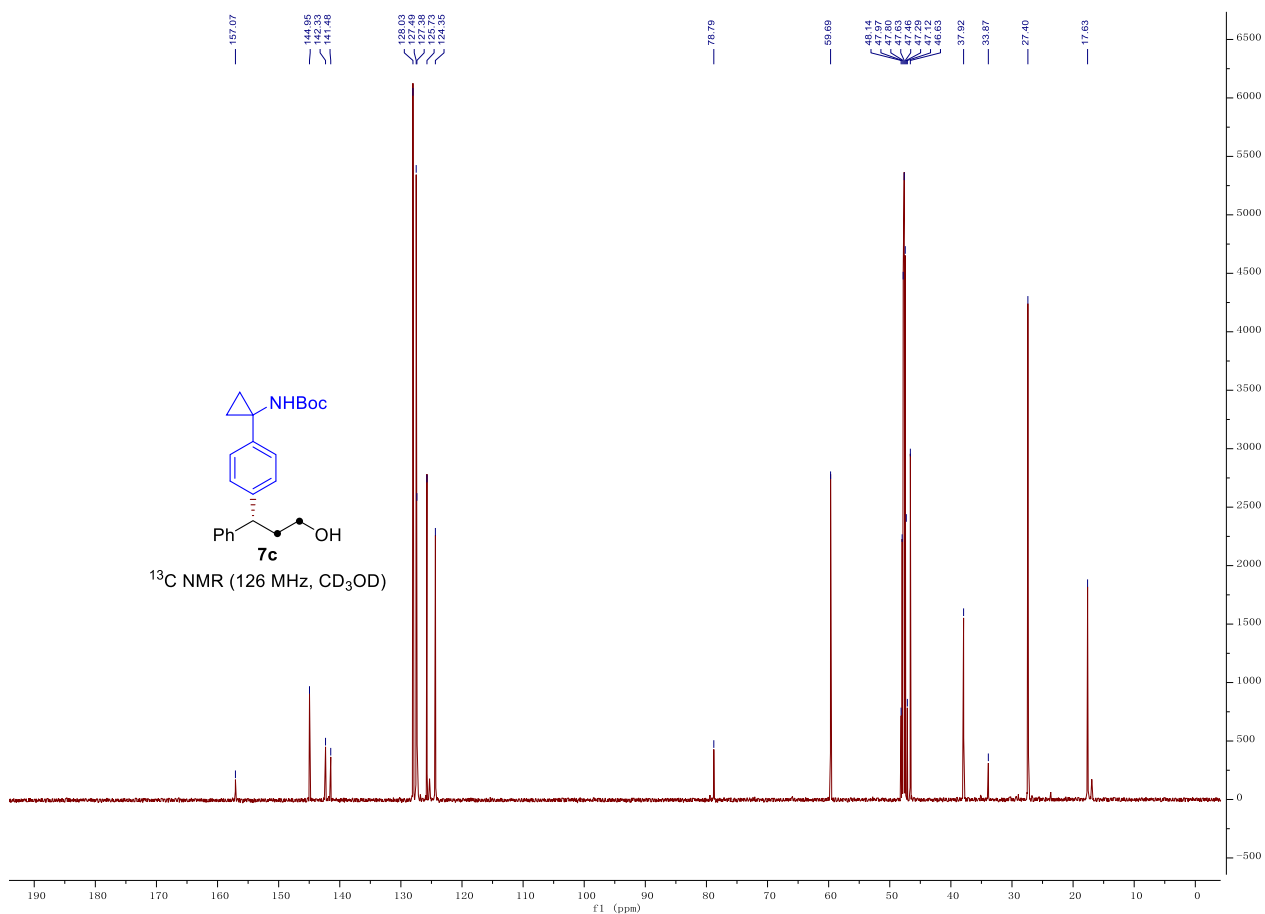

Supplementary Fig. 114.  $^{13}\text{C}$  NMR of compound **7c**

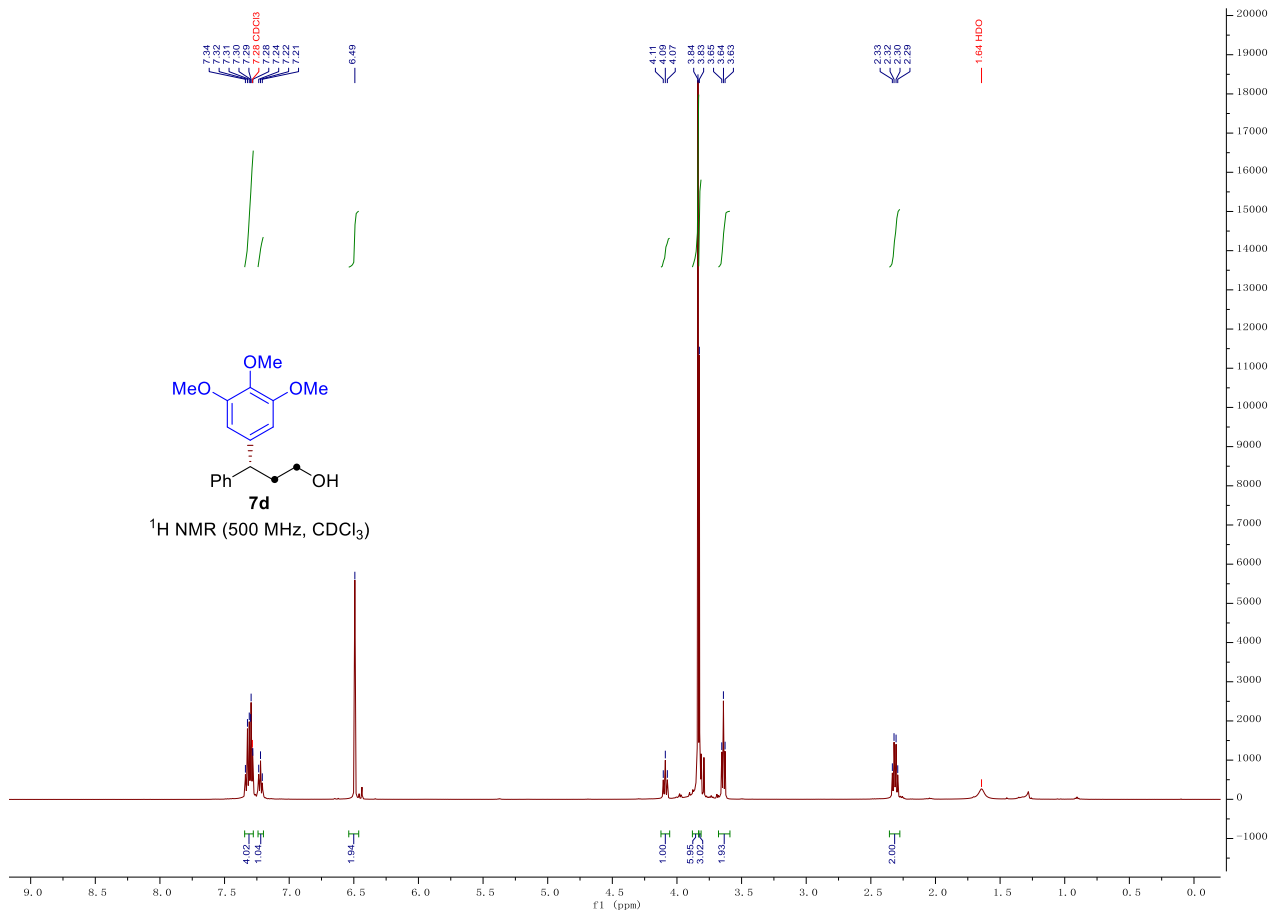

Supplementary Fig. 115.  $^1\text{H}$  NMR of compound **7d**

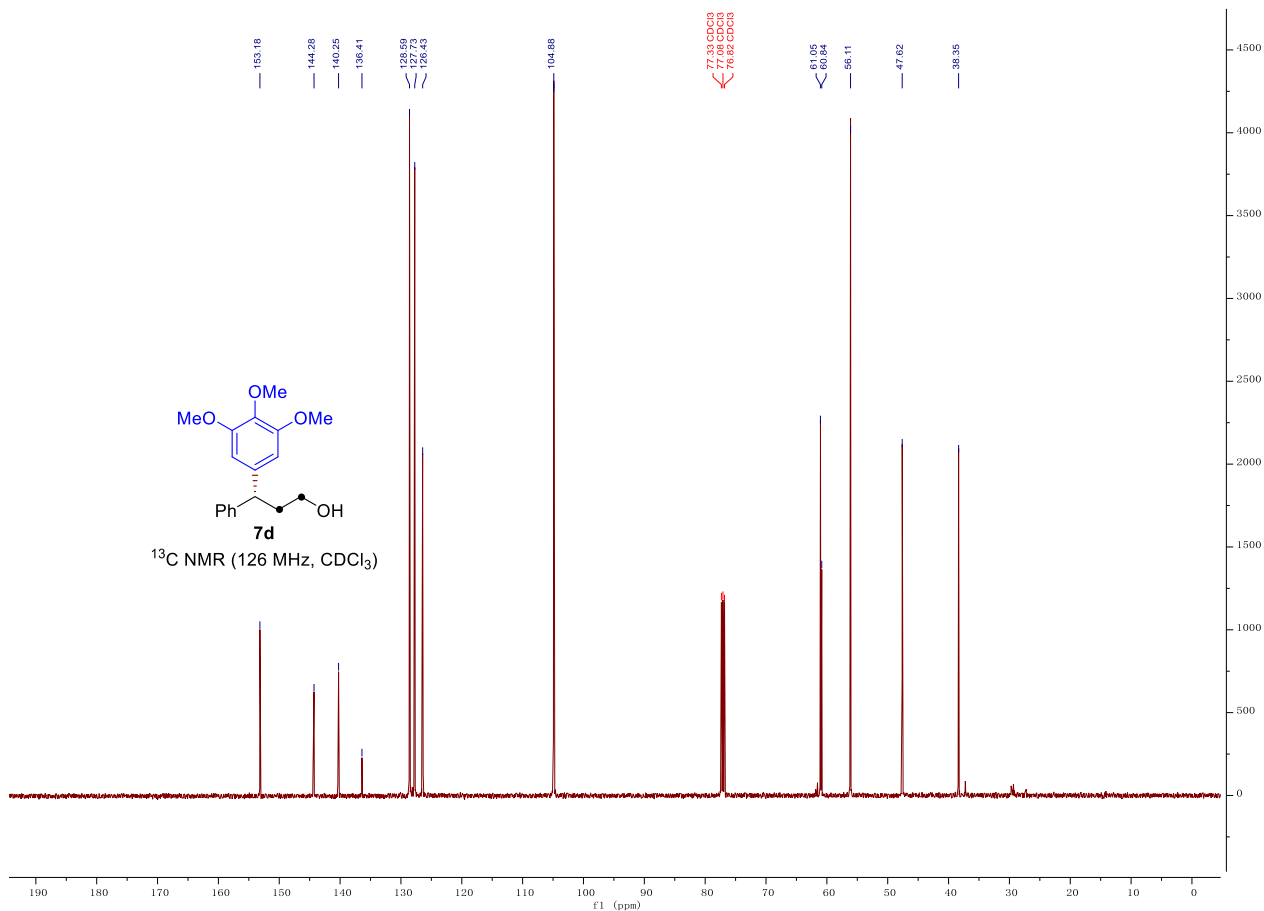

**Supplementary Fig. 116.** <sup>13</sup>C NMR of compound **7d**

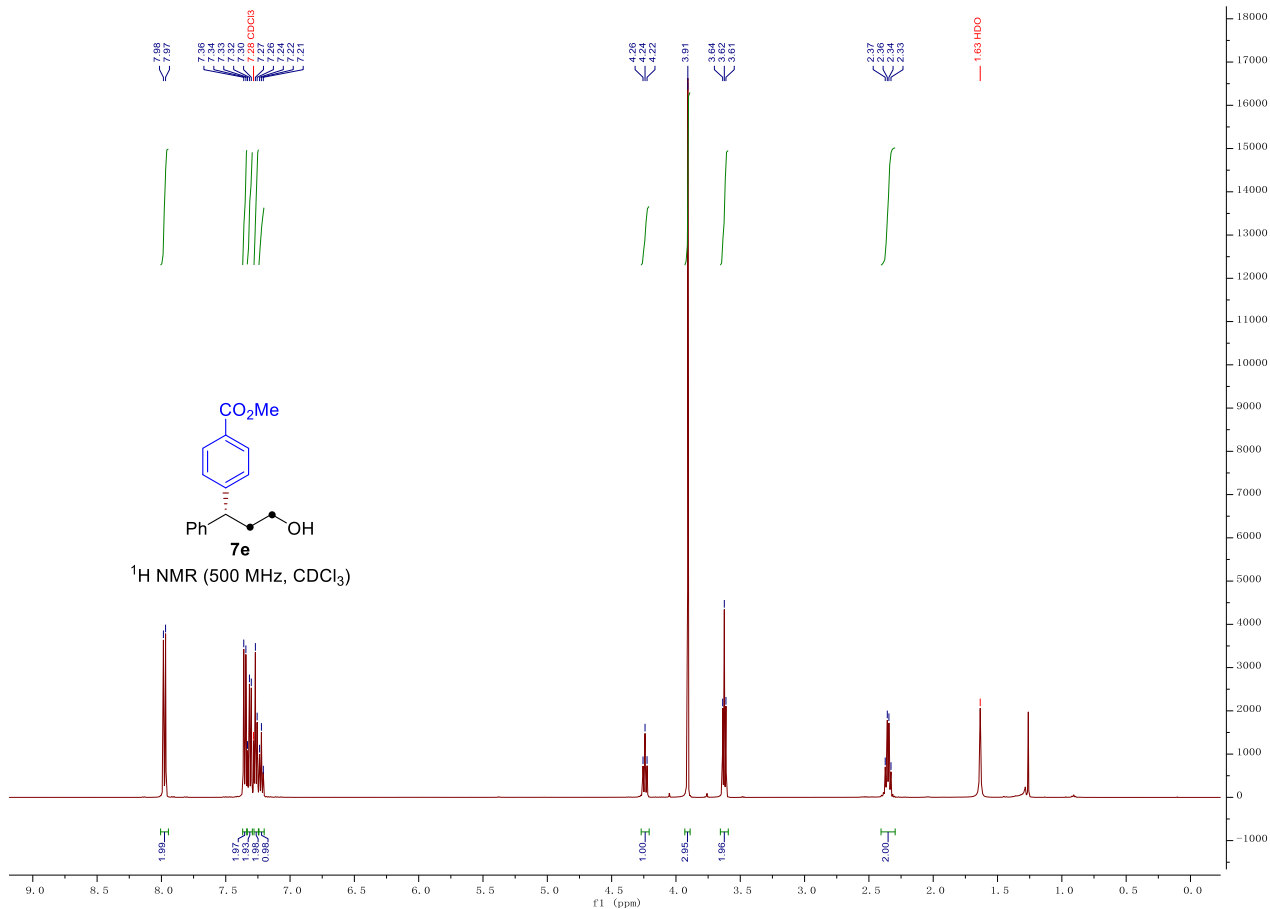

**Supplementary Fig. 117.** <sup>1</sup>H NMR of compound **7e**

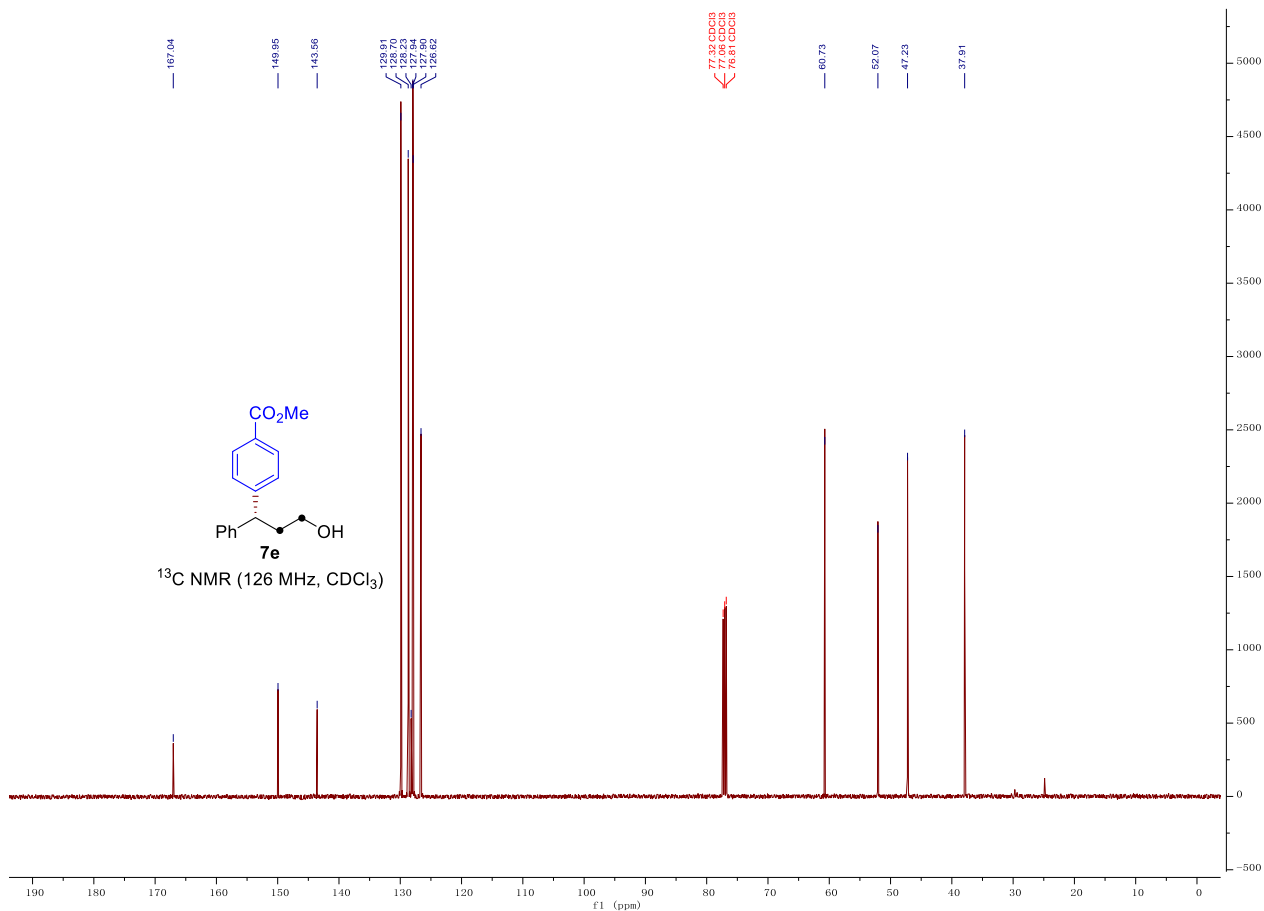

**Supplementary Fig. 118.** <sup>13</sup>C NMR of compound **7e**

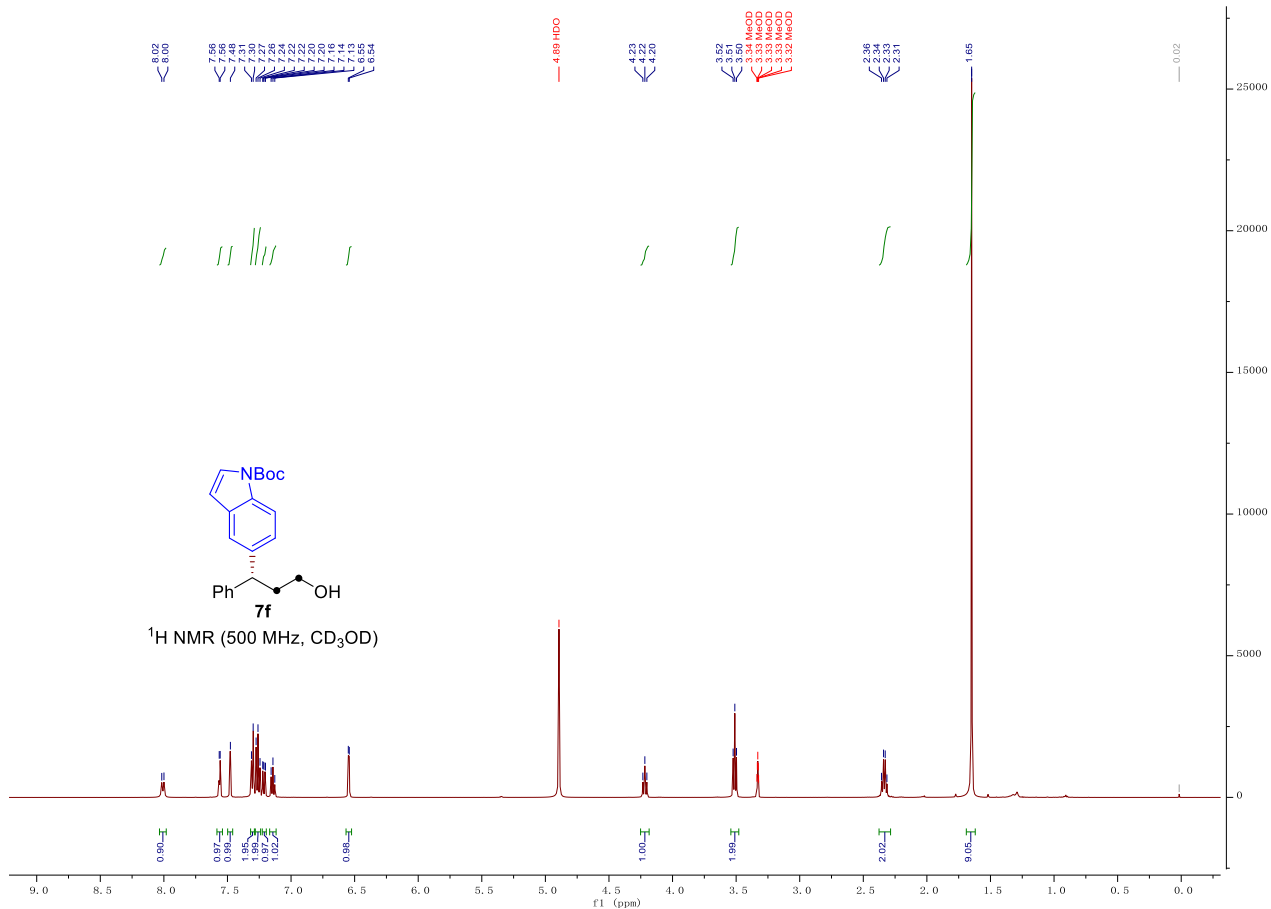

**Supplementary Fig. 119.** <sup>1</sup>H NMR of compound **7f**

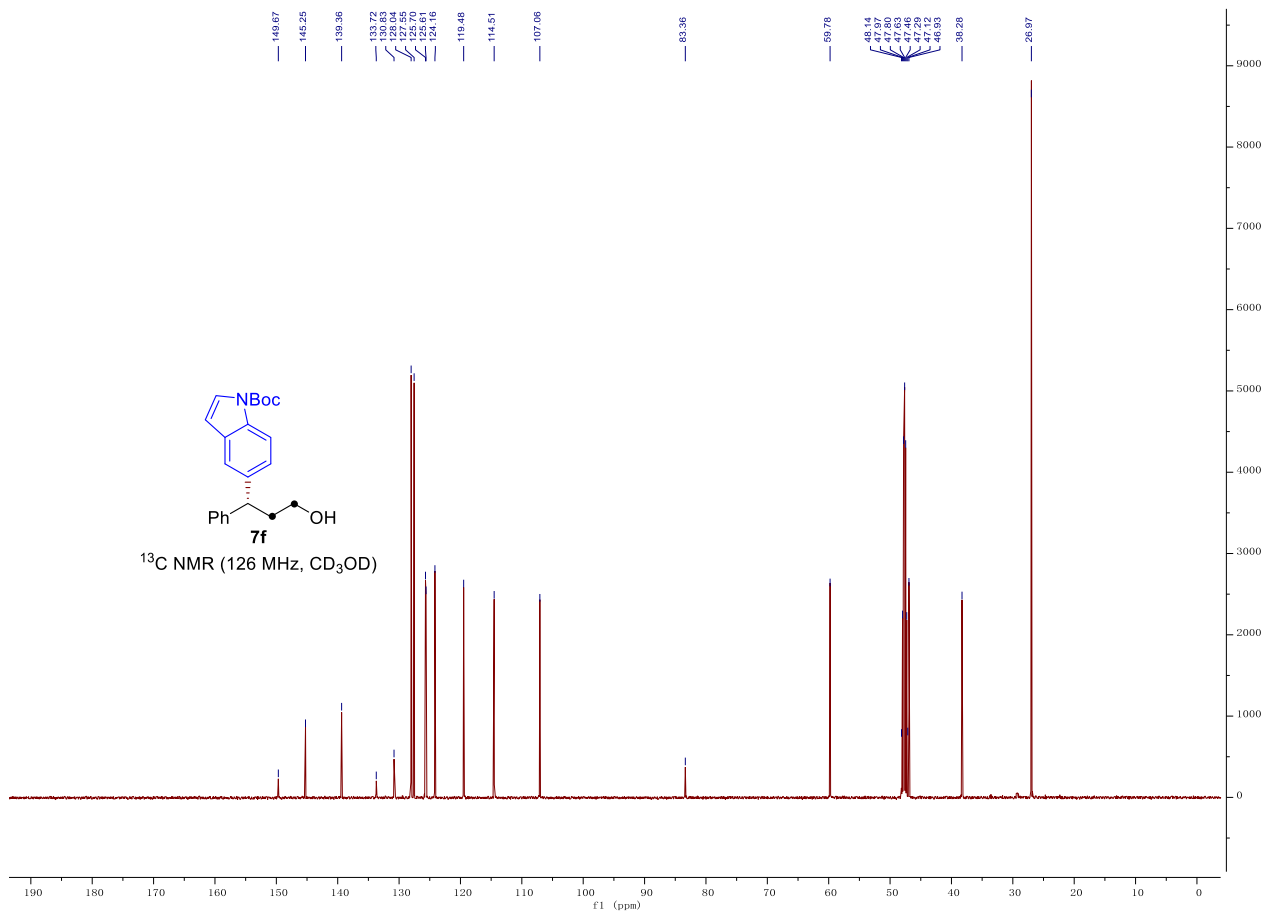

**Supplementary Fig. 120.** <sup>13</sup>C NMR of compound **7f**

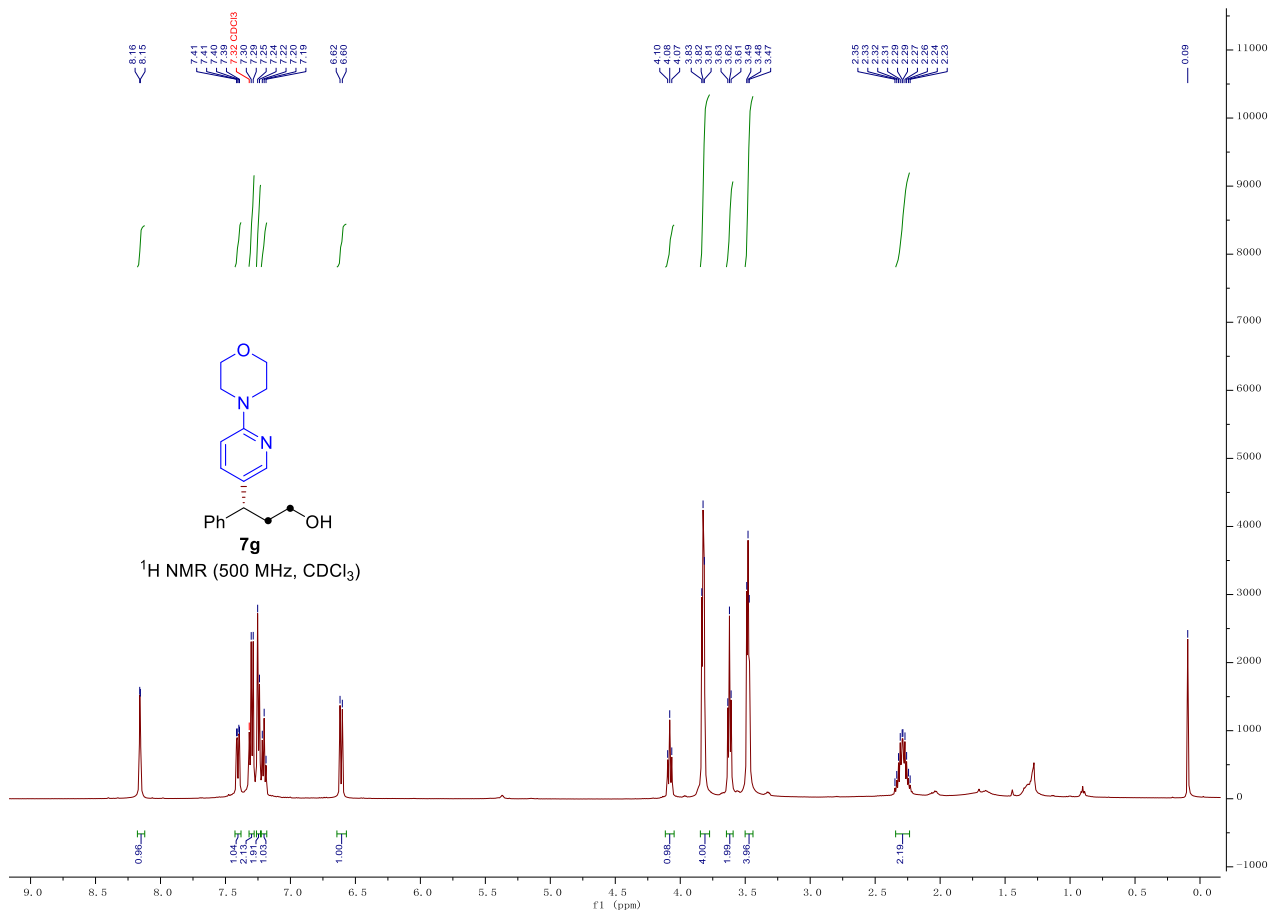

**Supplementary Fig. 121.** <sup>1</sup>H NMR of compound **7g**

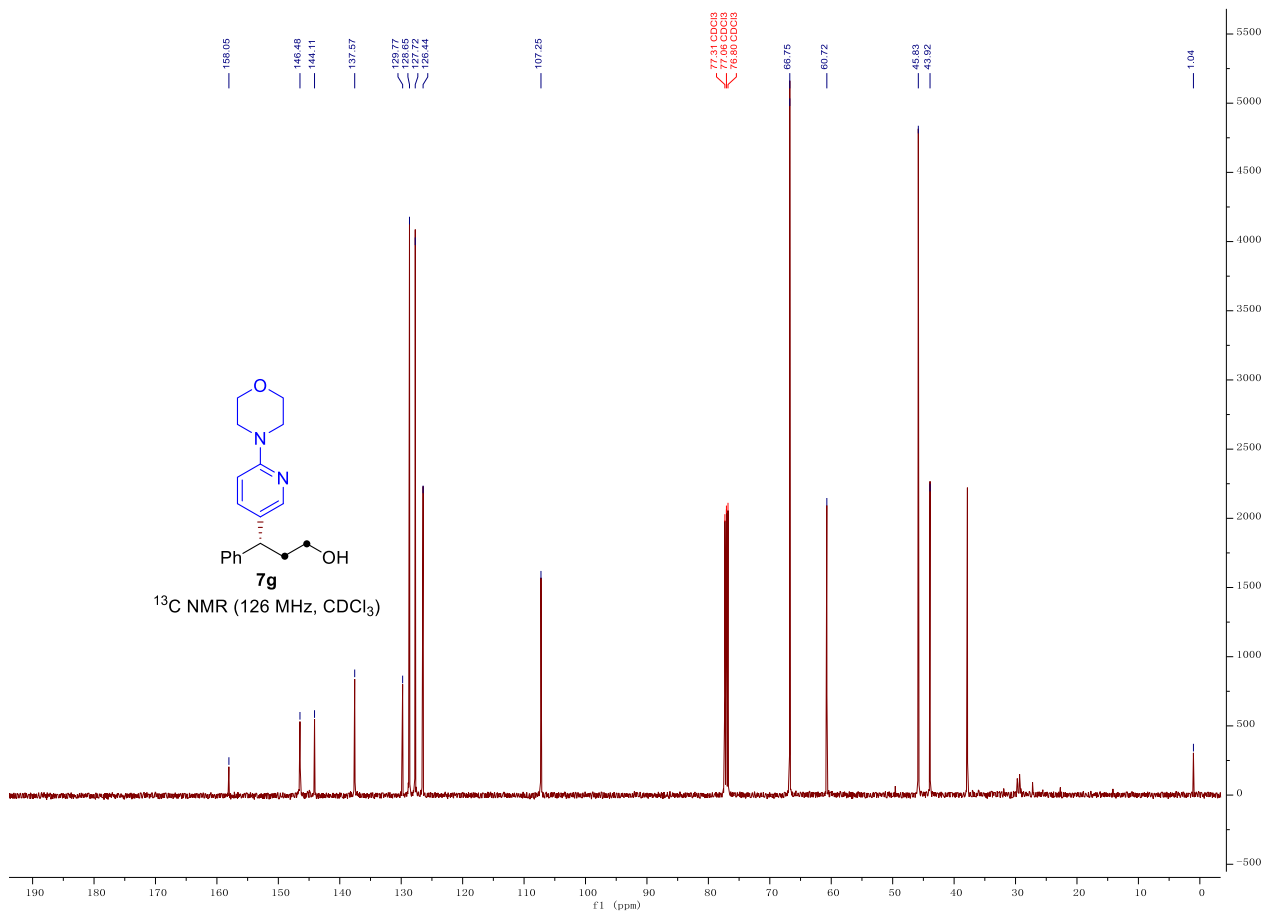

Supplementary Fig. 122.  $^{13}\text{C}$  NMR of compound **7g**

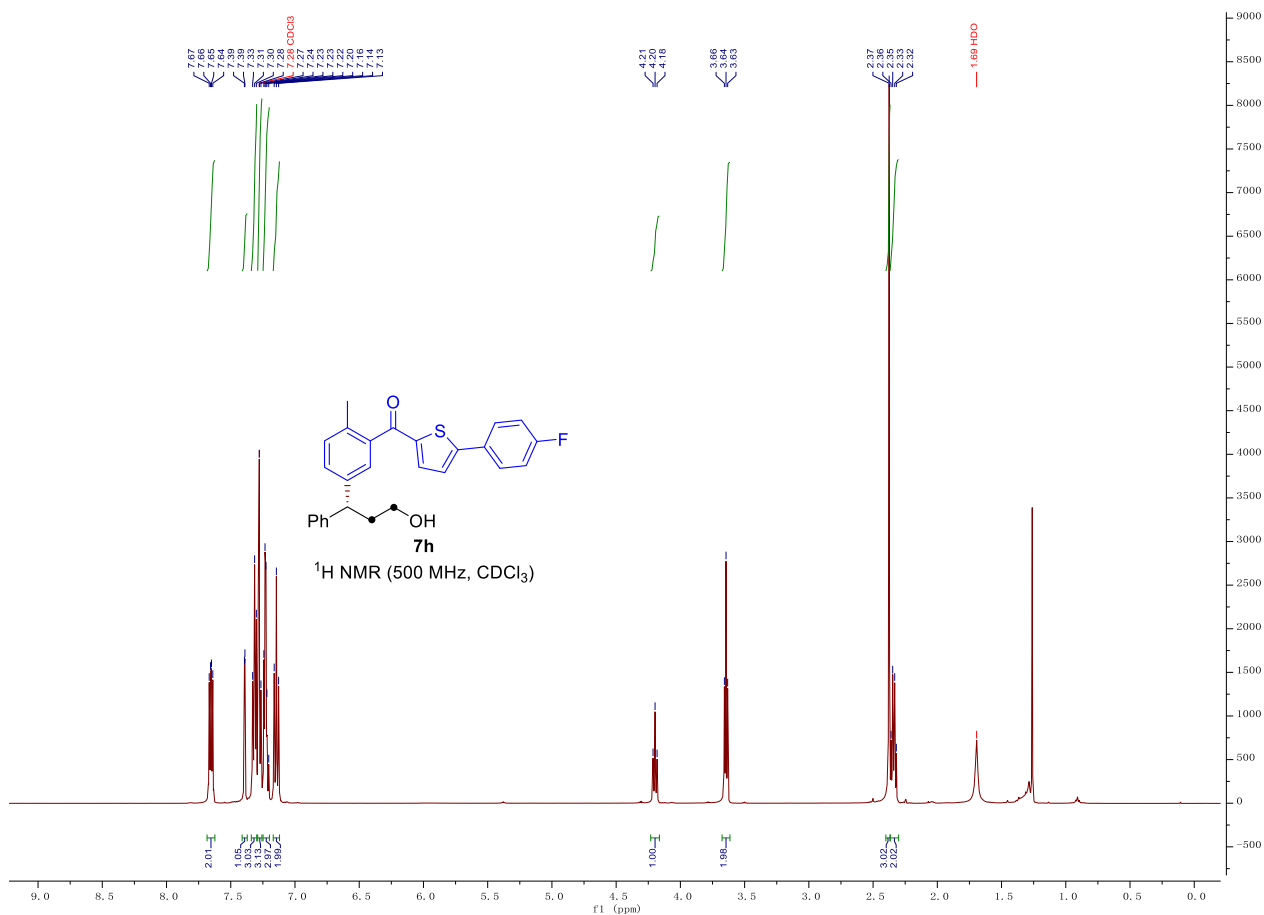

Supplementary Fig. 123.  $^1\text{H}$  NMR of compound **7h**



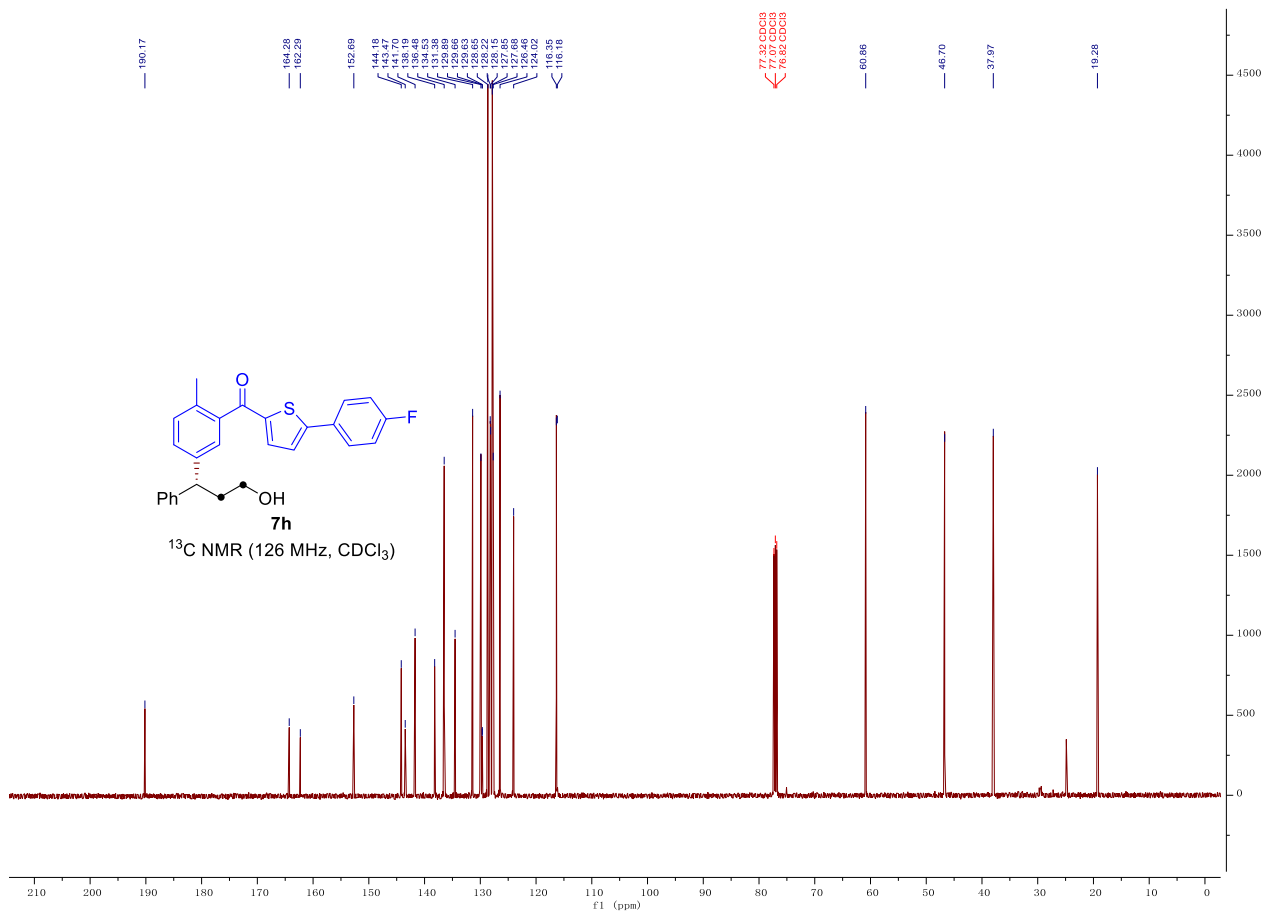

Supplementary Fig. 124. <sup>13</sup>C NMR of compound **7h**

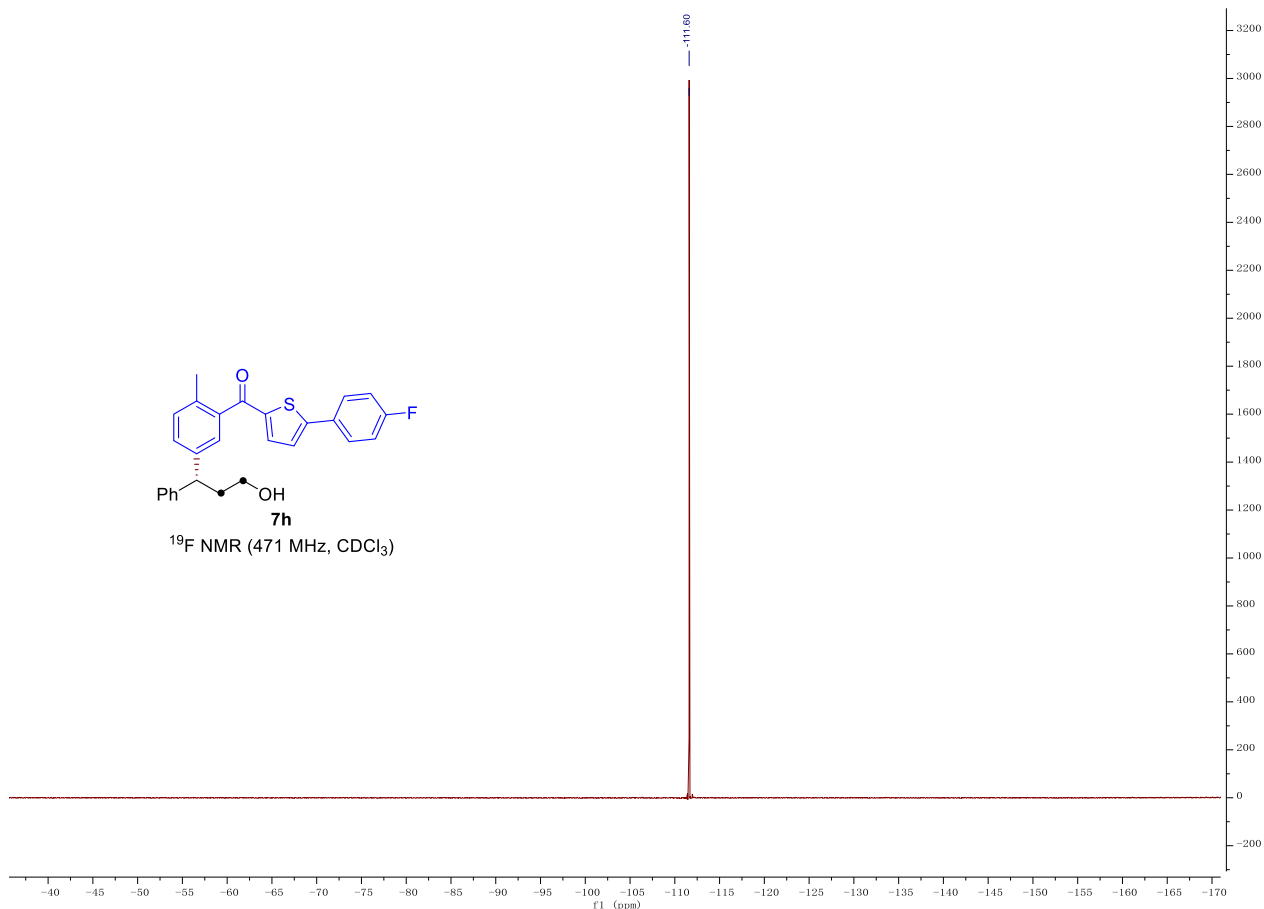

Supplementary Fig. 125. <sup>19</sup>F NMR of compound **7h**

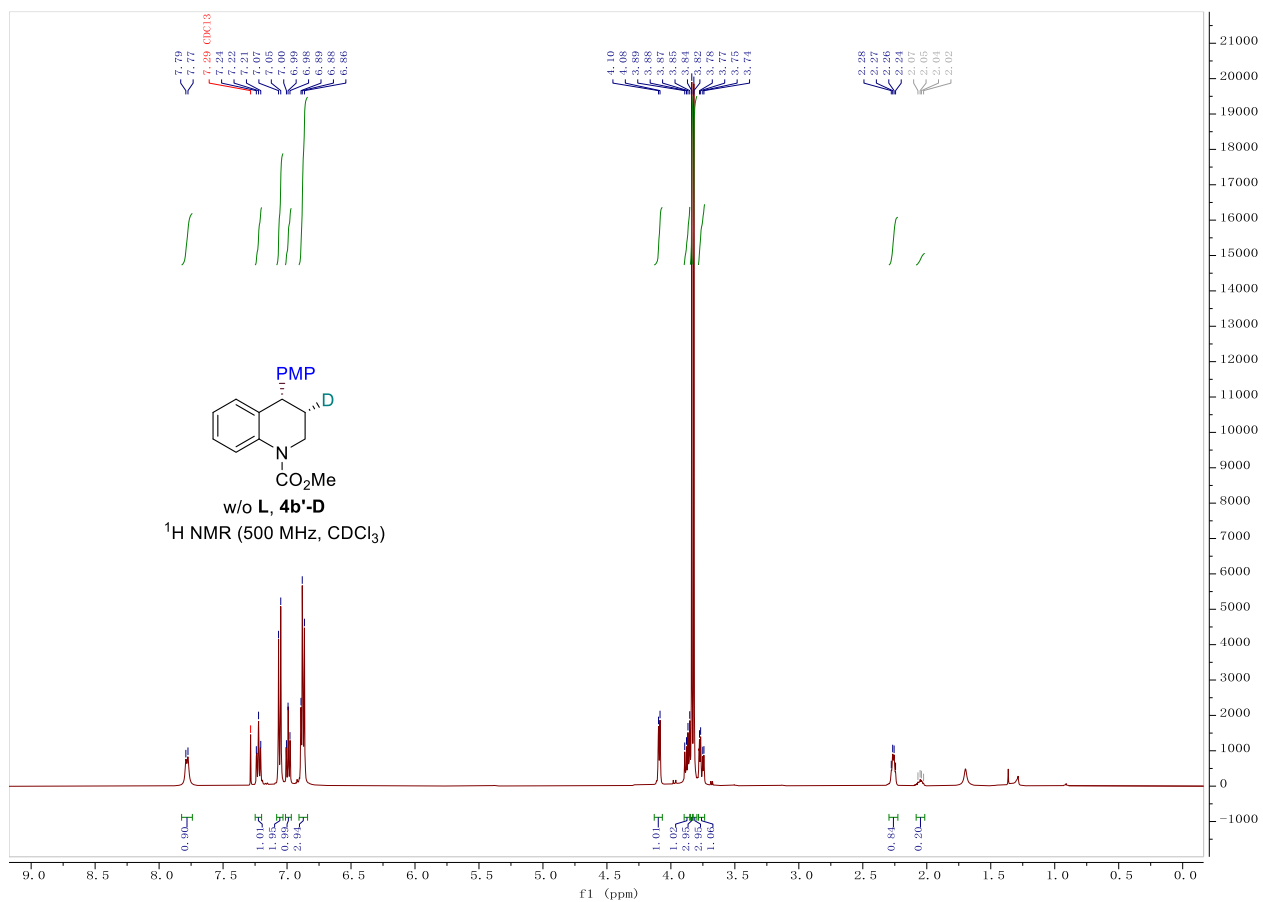

Supplementary Fig. 126. <sup>1</sup>H NMR of compound **4b'-D** (w/o L)

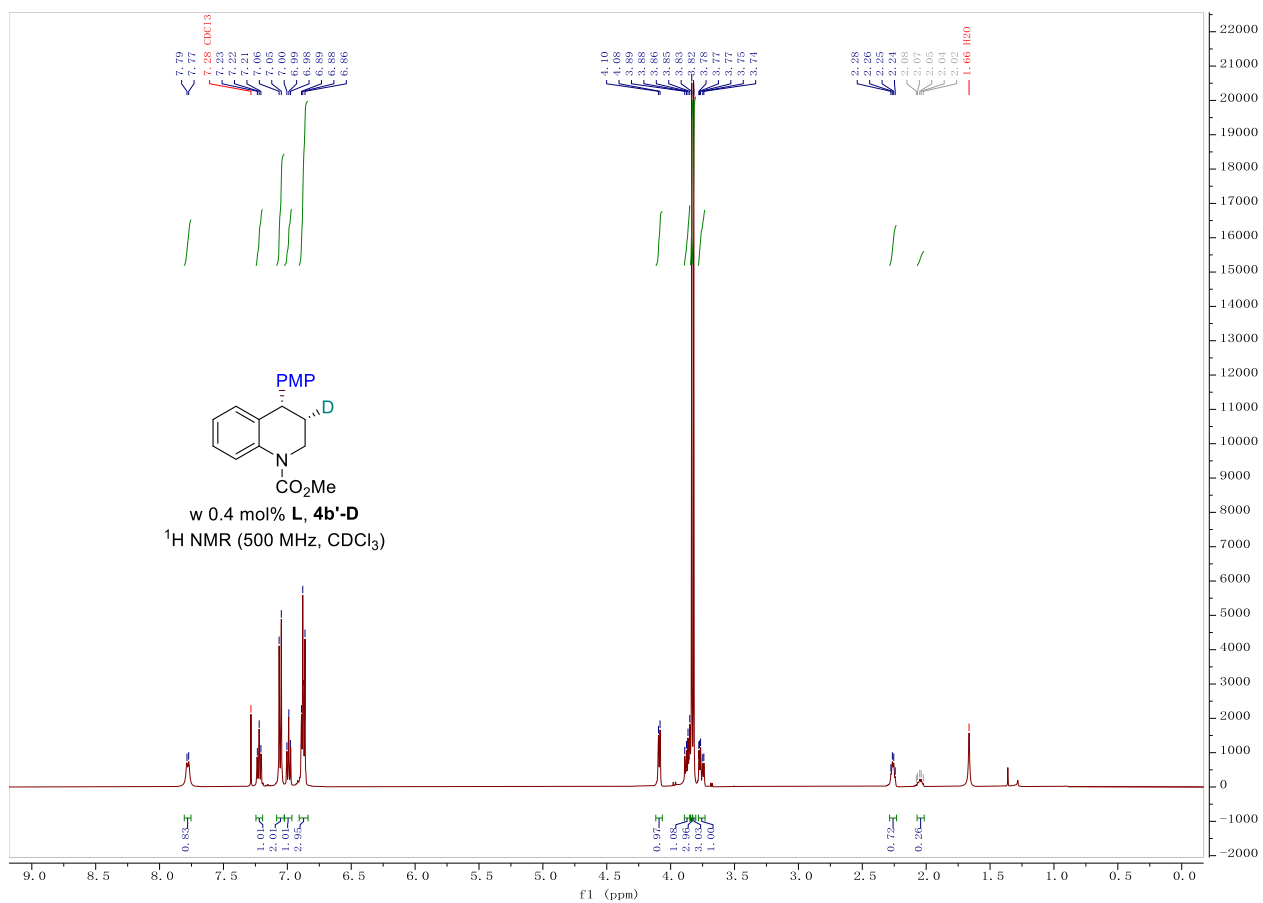

Supplementary Fig. 127. <sup>1</sup>H NMR of compound **4b'-D** (w 0.4 mol% L)

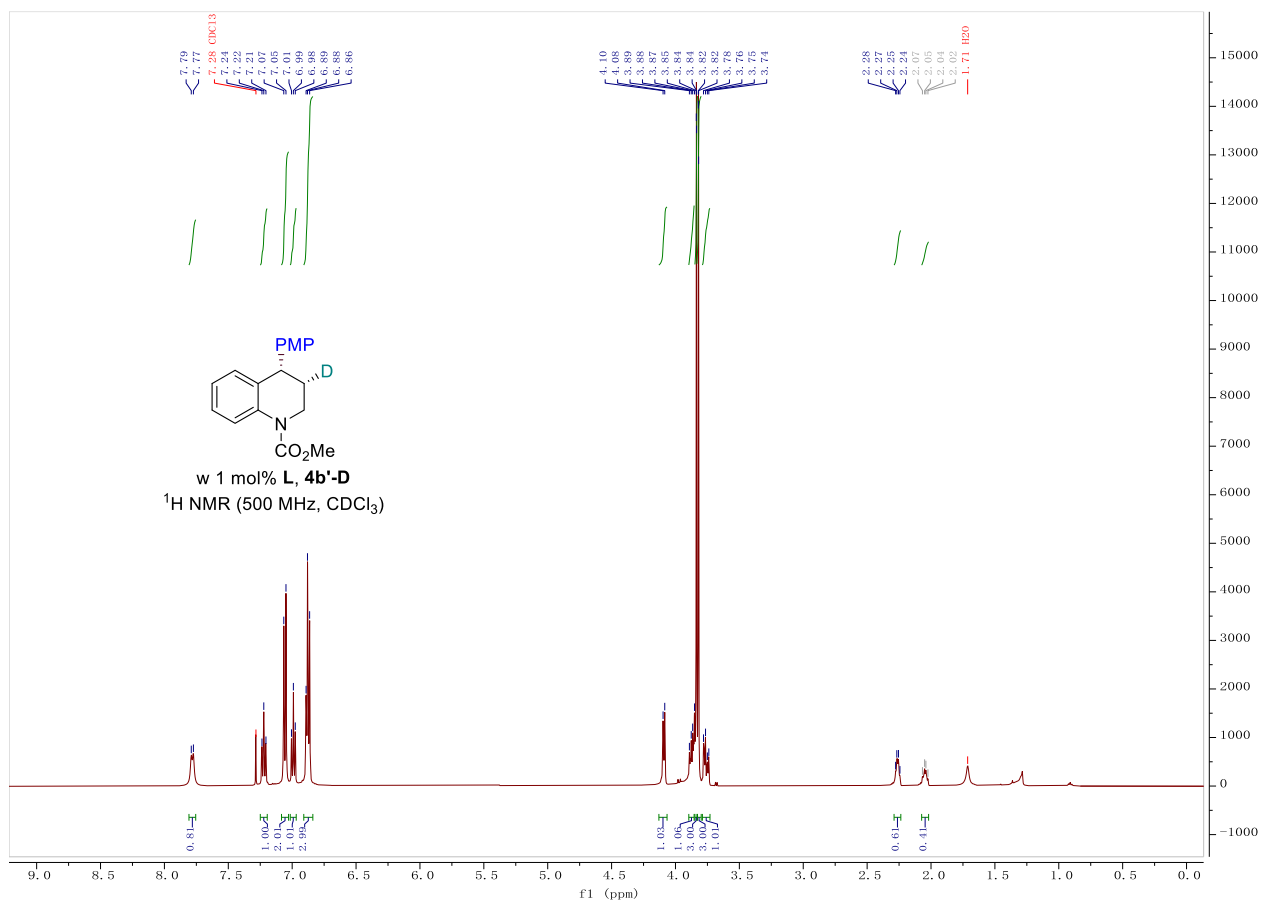

**Supplementary Fig. 128.** <sup>1</sup>H NMR of compound **4b'-D** (w 1 mol% L)

### 2.13. Spectroscopic Data (HPLC Trace)

Sample Name: YH-17-99-RAC

```

=====
Acq. Operator   : SYSTEM                      Seq. Line :    5
Acq. Instrument : HPLC1260                  Location  : P1-B1
Injection Date  : 8/23/2020 10:42:48 PM     Inj       :    1
                                           Inj Volume: 3.000 µl
Different Inj Volume from Sample Entry! Actual Inj Volume : 1.000 µl
Method          : E:\DATA\20200823\LC 2020-08-23 20-27-59\1EtOH_40_5_1.M (Sequence Method)
Last changed    : 8/23/2020 9:45:14 PM by SYSTEM
Additional Info : Peak(s) manually integrated
=====

```

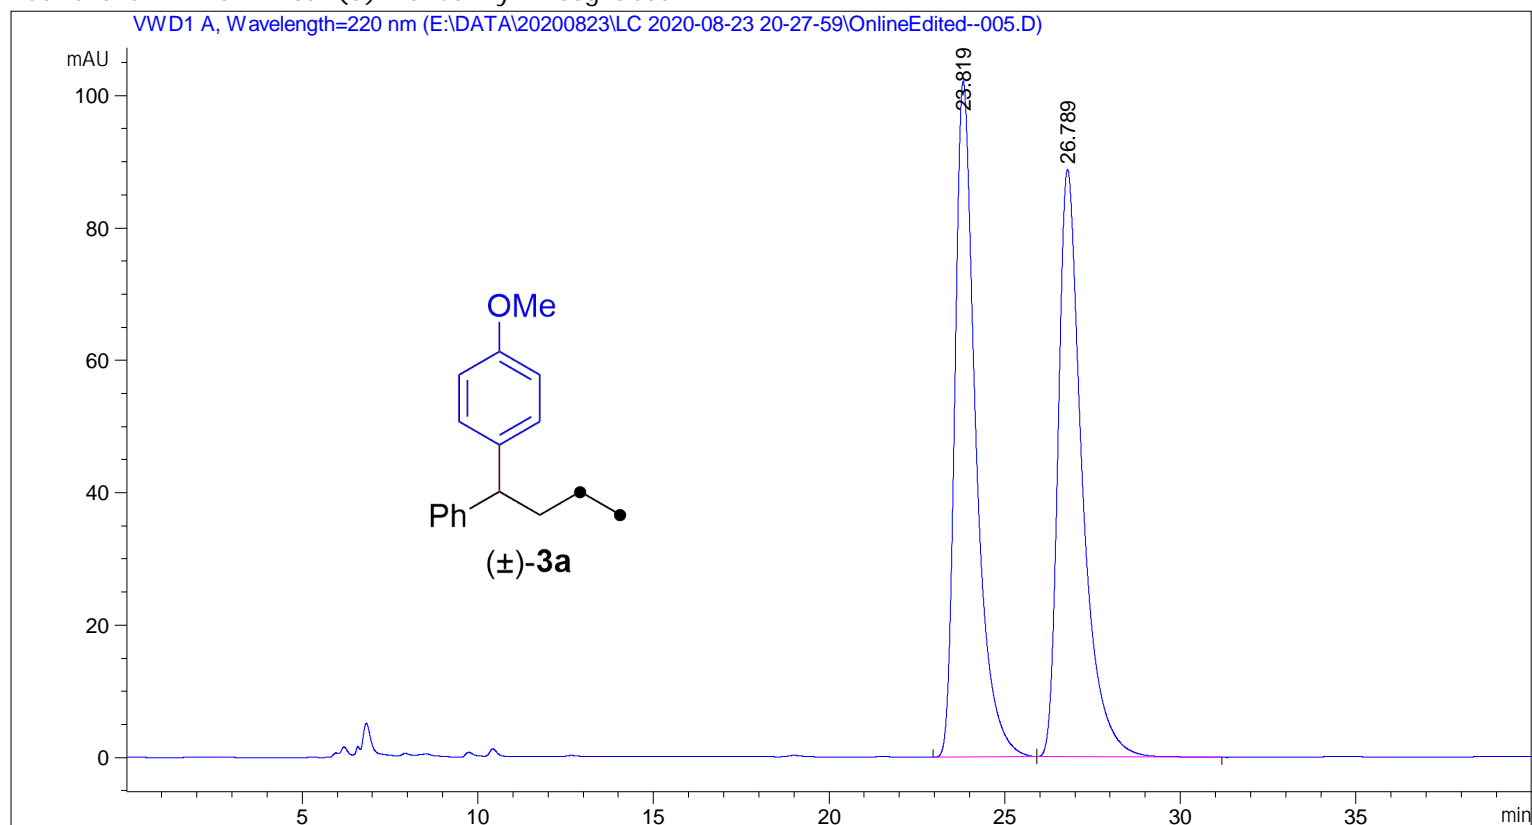

```

=====
                          Area Percent Report
=====

```

```

Sorted By      :      Signal
Multiplier     :      1.0000
Dilution      :      1.0000
Use Multiplier & Dilution Factor with ISTDs

```

Signal 1: VWD1 A, Wavelength=220 nm

| Peak # | RetTime [min] | Type | Width [min] | Area [mAU*s] | Height [mAU] | Area %  |
|--------|---------------|------|-------------|--------------|--------------|---------|
| 1      | 23.819        | BB   | 0.6182      | 4220.85645   | 102.11806    | 49.9447 |
| 2      | 26.789        | BB   | 0.7080      | 4230.19873   | 88.77055     | 50.0553 |

```
Totals :                      8451.05518  190.88861
```

```

=====
*** End of Report ***

```

Sample Name: YH-17-99-EE

```

=====
Acq. Operator   : SYSTEM                      Seq. Line :    6
Acq. Instrument : HPLC1260                   Location  : P1-B2
Injection Date  : 8/23/2020 11:23:33 PM      Inj       :    1
                                           Inj Volume: 3.000 µl
Different Inj Volume from Sample Entry! Actual Inj Volume : 1.000 µl
Method          : E:\DATA\20200823\LC 2020-08-23 20-27-59\1EtOH_40_5_1.M (Sequence Method)
Last changed    : 8/23/2020 9:45:14 PM by SYSTEM
Additional Info : Peak(s) manually integrated
=====

```

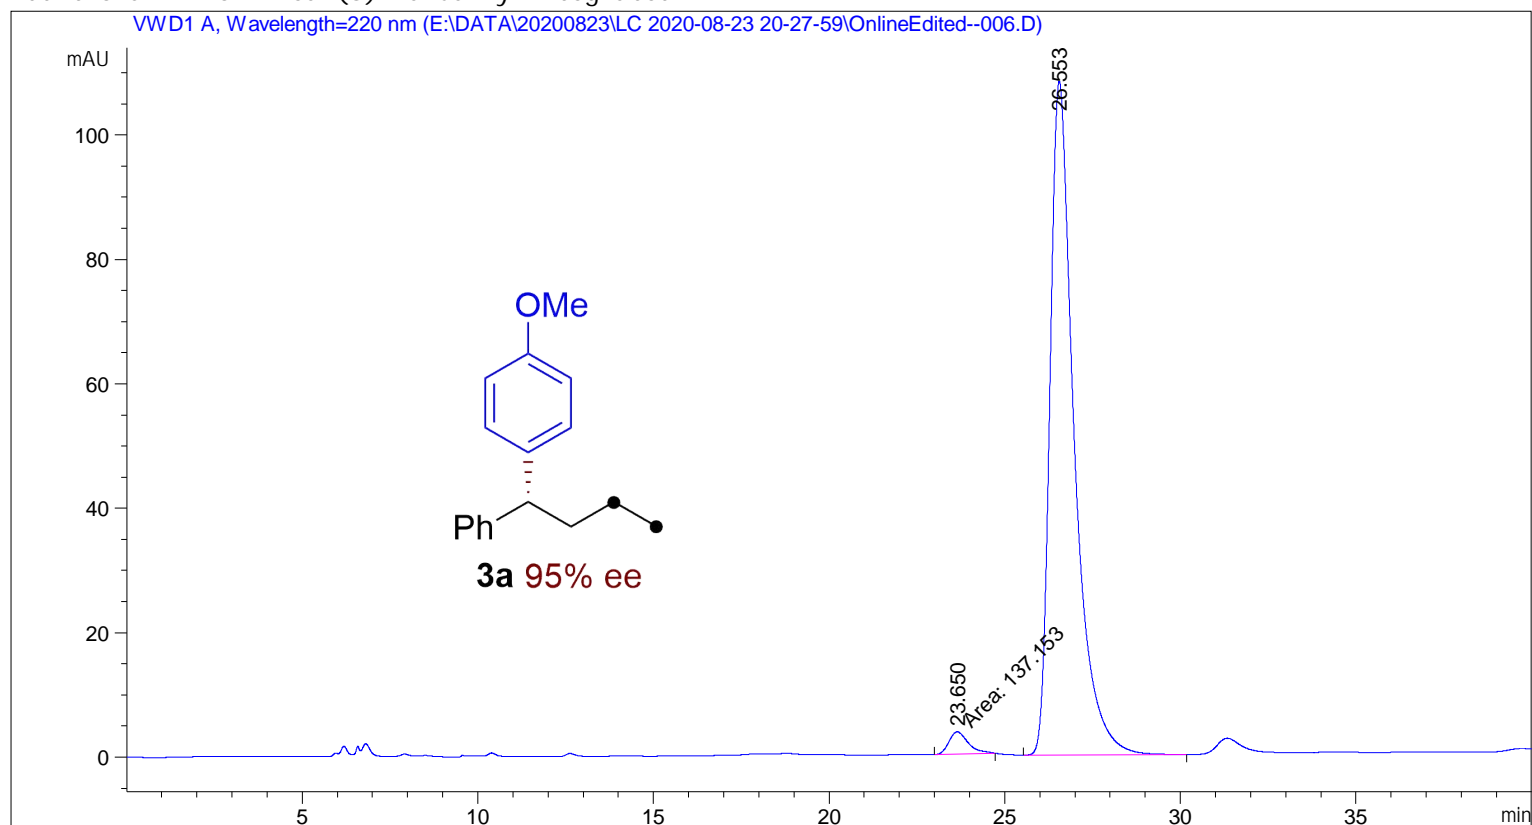

```

=====
                          Area Percent Report
=====

```

```

Sorted By      :      Signal
Multiplier     :      1.0000
Dilution      :      1.0000
Use Multiplier & Dilution Factor with ISTDs

```

Signal 1: VWD1 A, Wavelength=220 nm

| Peak # | RetTime [min] | Type | Width [min] | Area [mAU*s] | Height [mAU] | Area %  |
|--------|---------------|------|-------------|--------------|--------------|---------|
| 1      | 23.650        | MM   | 0.6355      | 137.15309    | 3.59698      | 2.5840  |
| 2      | 26.553        | BB   | 0.7092      | 5170.54736   | 108.26321    | 97.4160 |

```
Totals :                      5307.70045  111.86019
```

```

=====
*** End of Report ***

```

Sample Name: YH-17-114-RAC

```

=====
Acq. Operator   : SYSTEM                               Seq. Line :   10
Acq. Instrument : HPLC1260                           Location  :   P1-A3
Injection Date  : 8/30/2020 11:52:20 PM              Inj       :    1
                                                    Inj Volume: 3.000 µl
Different Inj Volume from Sample Entry! Actual Inj Volume : 1.000 µl
Acq. Method    : E:\DATA\20200829\LC 2020-08-30 17-08-41\11PA_40_8_1.M
Last changed   : 8/30/2020 10:59:52 PM by SYSTEM
Analysis Method : E:\DATA\20200829\LC 2020-08-30 17-08-41\11PA_40_8_1.M (Sequence Method)
Last changed   : 8/31/2020 8:29:58 AM by SYSTEM
                (modified after loading)
Additional Info : Peak(s) manually integrated
  
```

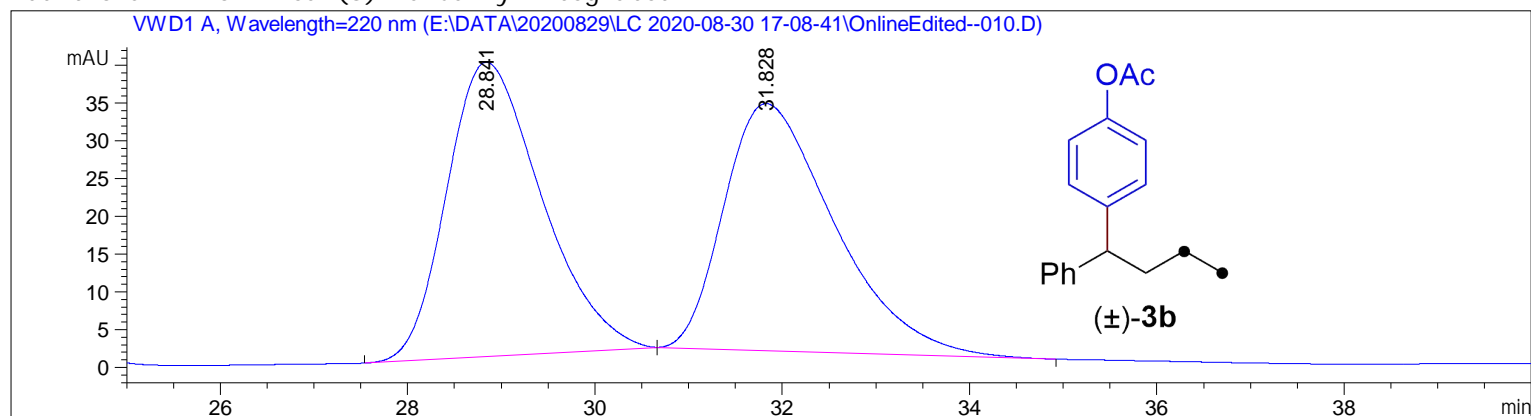

```

=====
                          Area Percent Report
=====
  
```

```

Sorted By      :      Signal
Multiplier     :      1.0000
Dilution      :      1.0000
Do not use Multiplier & Dilution Factor with ISTDs
  
```

Signal 1: VWD1 A, Wavelength=220 nm

| Peak # | RetTime [min] | Type | Width [min] | Area [mAU*s] | Height [mAU] | Area %  |
|--------|---------------|------|-------------|--------------|--------------|---------|
| 1      | 28.841        | BB   | 1.0787      | 2737.25195   | 39.00799     | 50.5082 |
| 2      | 31.828        | BB   | 1.2281      | 2682.16821   | 32.72819     | 49.4918 |

```
Totals :                5419.42017    71.73618
```

```

=====
*** End of Report ***
  
```

Sample Name: YH-17-114-EE

```

=====
Acq. Operator   : SYSTEM                               Seq. Line :   11
Acq. Instrument : HPLC1260                             Location  : P1-A4
Injection Date  : 8/31/2020 12:33:04 AM                Inj       :    1
                                                    Inj Volume: 3.000 µl
Different Inj Volume from Sample Entry! Actual Inj Volume : 1.000 µl
Acq. Method     : E:\DATA\20200829\LC 2020-08-30 17-08-41\11PA_40_8_1.M
Last changed    : 8/30/2020 10:59:52 PM by SYSTEM
Analysis Method : E:\DATA\20200829\LC 2020-08-30 17-08-41\11PA_40_8_1.M (Sequence Method)
Last changed    : 8/31/2020 8:29:58 AM by SYSTEM
                  (modified after loading)
Additional Info : Peak(s) manually integrated
  
```

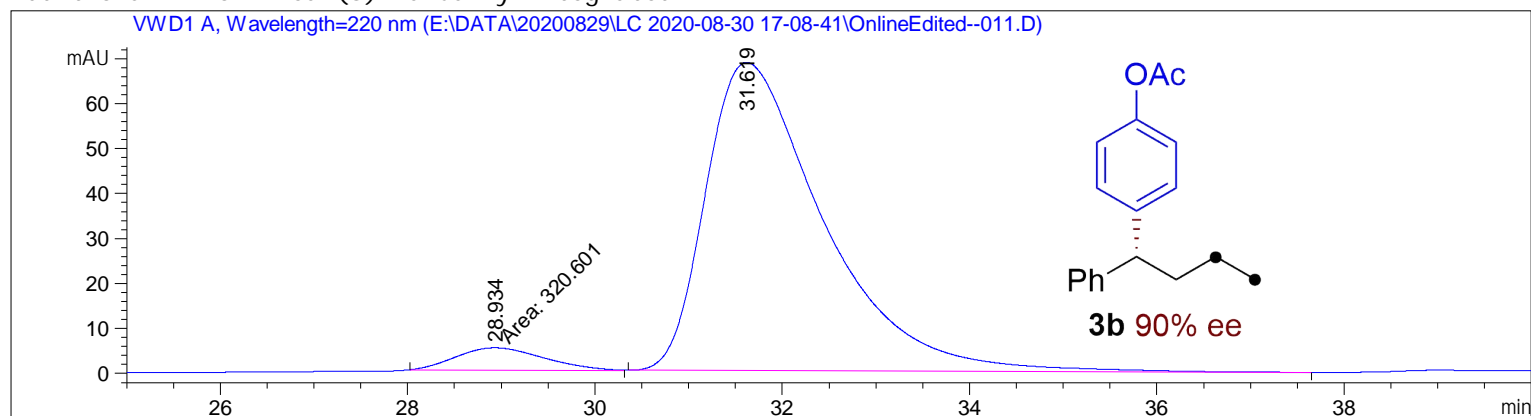

```

=====
                          Area Percent Report
=====
  
```

```

Sorted By      :      Signal
Multiplier     :      1.0000
Dilution      :      1.0000
Do not use Multiplier & Dilution Factor with ISTDs
  
```

Signal 1: VWD1 A, Wavelength=220 nm

| Peak # | RetTime [min] | Type | Width [min] | Area [mAU*s] | Height [mAU] | Area %  |
|--------|---------------|------|-------------|--------------|--------------|---------|
| 1      | 28.934        | MM   | 1.0810      | 320.60114    | 4.94317      | 5.0726  |
| 2      | 31.619        | BB   | 1.3067      | 5999.65186   | 68.51117     | 94.9274 |

```
Totals :                      6320.25299   73.45434
```

```

=====
*** End of Report ***
  
```



Sample Name: YH-17-115-RAC

```

=====
Acq. Operator   : SYSTEM                      Seq. Line :    6
Acq. Instrument : HPLC1260                   Location  : P1-B1
Injection Date  : 9/1/2020 11:33:42 AM      Inj       :    1
                                           Inj Volume: 3.000 µl
Different Inj Volume from Sample Entry! Actual Inj Volume : 5.000 µl
Acq. Method    : E:\DATA\20200831\LC 2020-09-01 08-57-38\11PA_80_8_1.M
Last changed   : 9/1/2020 9:51:26 AM by SYSTEM
Analysis Method: E:\DATA\20200831\LC 2020-09-01 08-57-38\11PA_80_8_1.M (Sequence Method)
Last changed   : 9/1/2020 2:27:42 PM by SYSTEM
                (modified after loading)
Additional Info : Peak(s) manually integrated
  
```

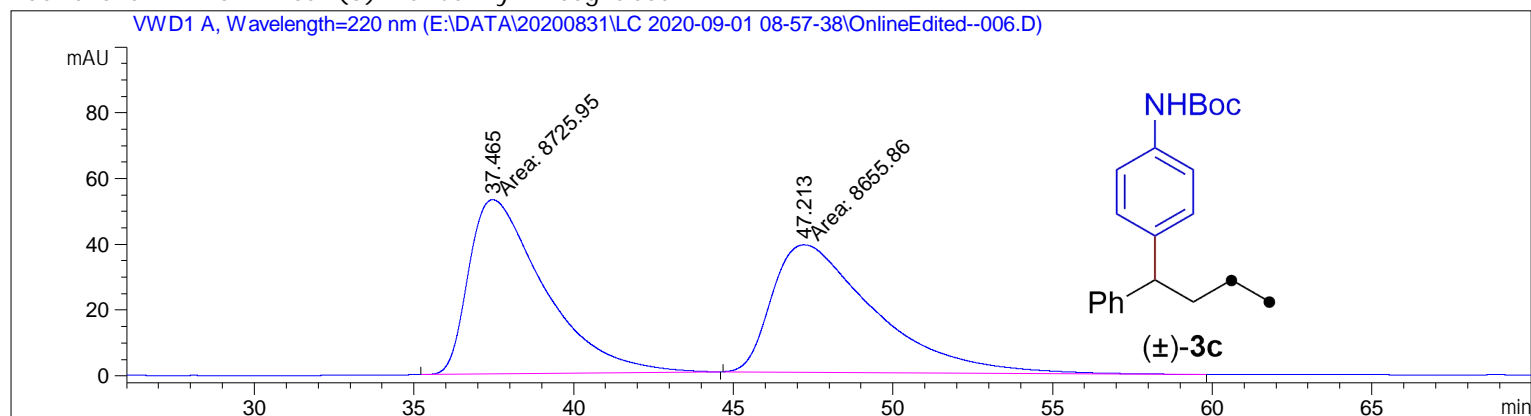

```

=====
                          Area Percent Report
=====
  
```

```

Sorted By      :      Signal
Multiplier     :      1.0000
Dilution      :      1.0000
Do not use Multiplier & Dilution Factor with ISTDs
  
```

Signal 1: VWD1 A, Wavelength=220 nm

| Peak # | RetTime [min] | Type | Width [min] | Area [mAU*s] | Height [mAU] | Area %  |
|--------|---------------|------|-------------|--------------|--------------|---------|
| 1      | 37.465        | MM   | 2.7428      | 8725.95410   | 53.02317     | 50.2016 |
| 2      | 47.213        | MM   | 3.7236      | 8655.86230   | 38.74373     | 49.7984 |

```
Totals :                      1.73818e4    91.76690
```

```

=====
*** End of Report ***
  
```

Sample Name: YH-17-115-EE

```

=====
Acq. Operator   : SYSTEM                      Seq. Line :    7
Acq. Instrument : HPLC1260                   Location  : P1-B2
Injection Date  : 9/1/2020 12:54:30 PM      Inj       :    1
                                           Inj Volume: 3.000 µl

Acq. Method     : E:\DATA\20200831\LC 2020-09-01 08-57-38\11PA_80_8_1.M
Last changed    : 9/1/2020 9:51:26 AM by SYSTEM
Analysis Method : E:\DATA\20200831\LC 2020-09-01 08-57-38\11PA_80_8_1.M (Sequence Method)
Last changed    : 9/1/2020 2:27:42 PM by SYSTEM
                 (modified after loading)

Additional Info : Peak(s) manually integrated

```

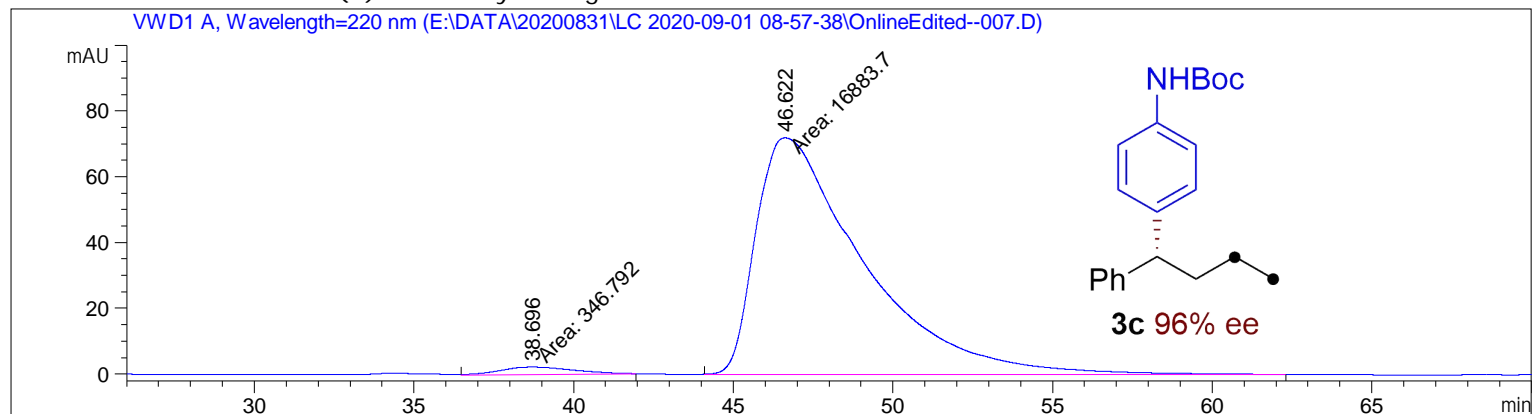

```

=====
                          Area Percent Report
=====

```

```

Sorted By      :      Signal
Multiplier     :      1.0000
Dilution       :      1.0000
Do not use Multiplier & Dilution Factor with ISTDs

```

Signal 1: VWD1 A, Wavelength=220 nm

| Peak # | RetTime [min] | Type | Width [min] | Area [mAU*s] | Height [mAU] | Area %  |
|--------|---------------|------|-------------|--------------|--------------|---------|
| 1      | 38.696        | MM   | 1.8465      | 346.79208    | 2.20724      | 2.0127  |
| 2      | 46.622        | MM   | 3.9112      | 1.68837e4    | 71.94666     | 97.9873 |

```
Totals :                      1.72305e4    74.15389
```

```

=====
*** End of Report ***

```

Sample Name: YH-17-117-RAC

```

=====
Acq. Operator   : SYSTEM                               Seq. Line :   17
Acq. Instrument : HPLC1260                           Location  :   P1-B7
Injection Date  : 9/1/2020 4:52:28 PM                 Inj       :    1
                                                    Inj Volume: 3.000 µl
Different Inj Volume from Sample Entry! Actual Inj Volume : 5.000 µl
Acq. Method     : E:\DATA\20200831\LC 2020-09-01 08-57-38\51PA_30_5_1.M
Last changed    : 9/1/2020 4:57:29 PM by SYSTEM
                  (modified after loading)
Analysis Method : E:\DATA\20200831\LC 2020-09-01 08-57-38\51PA_30_5_1.M (Sequence Method)
Last changed    : 9/1/2020 6:08:47 PM by SYSTEM
                  (modified after loading)
Additional Info : Peak(s) manually integrated
=====

```

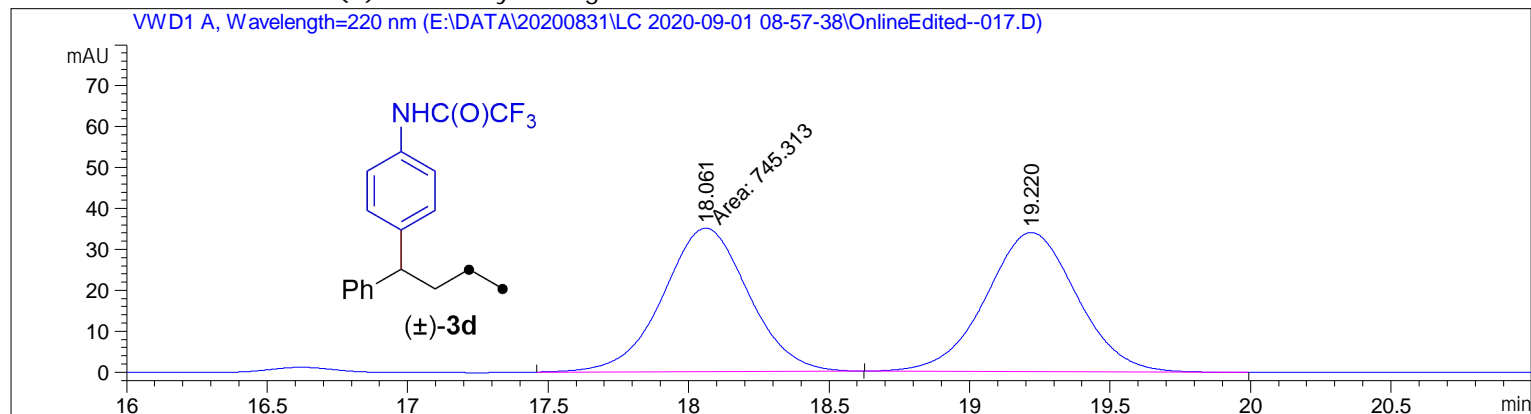

```

=====
                          Area Percent Report
=====

```

```

Sorted By      :      Signal
Multiplier     :      1.0000
Dilution       :      1.0000
Do not use Multiplier & Dilution Factor with ISTDs

```

Signal 1: VWD1 A, Wavelength=220 nm

| Peak # | RetTime [min] | Type | Width [min] | Area [mAU*s] | Height [mAU] | Area %  |
|--------|---------------|------|-------------|--------------|--------------|---------|
| 1      | 18.061        | FM   | 0.3541      | 745.31293    | 35.08218     | 49.2961 |
| 2      | 19.220        | BB   | 0.3470      | 766.59802    | 34.00572     | 50.7039 |

```
Totals :                1511.91095    69.08790
```

```

=====
*** End of Report ***
=====

```

Sample Name: YH-17-117-EE

```

=====
Acq. Operator   : SYSTEM                               Seq. Line :   18
Acq. Instrument : HPLC1260                           Location  :   P1-B2
Injection Date  : 9/1/2020 5:33:15 PM                 Inj       :    1
                                                    Inj Volume: 3.000 µl
Different Inj Volume from Sample Entry! Actual Inj Volume : 1.000 µl
Acq. Method     : E:\DATA\20200831\LC 2020-09-01 08-57-38\51PA_30_5_1.M
Last changed    : 9/1/2020 6:07:00 PM by SYSTEM
                  (modified after loading)
Analysis Method : E:\DATA\20200831\LC 2020-09-01 08-57-38\51PA_30_5_1.M (Sequence Method)
Last changed    : 9/1/2020 6:09:32 PM by SYSTEM
                  (modified after loading)
Additional Info : Peak(s) manually integrated
=====

```

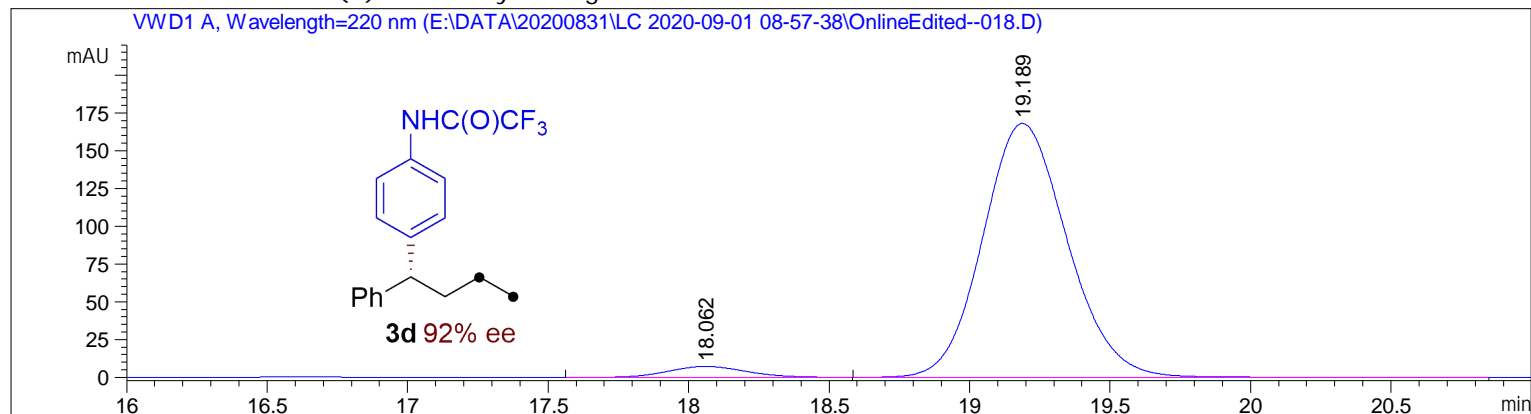

```

=====
                          Area Percent Report
=====

```

```

Sorted By           :      Signal
Multiplier          :      1.0000
Dilution            :      1.0000
Do not use Multiplier & Dilution Factor with ISTDs

```

Signal 1: VWD1 A, Wavelength=220 nm

| Peak # | RetTime [min] | Type | Width [min] | Area [mAU*s] | Height [mAU] | Area %  |
|--------|---------------|------|-------------|--------------|--------------|---------|
| 1      | 18.062        | BB   | 0.3017      | 141.60934    | 7.25616      | 3.8666  |
| 2      | 19.189        | BB   | 0.3244      | 3520.74316   | 168.05702    | 96.1334 |

```
Totals :                      3662.35251  175.31318
```

```

=====
*** End of Report ***
=====

```

Sample Name: YH-17-119-RAC

```

=====
Acq. Operator   : SYSTEM                      Seq. Line :    2
Acq. Instrument : HPLC1260                  Location  :   P1-A1
Injection Date  : 9/4/2020 2:42:22 PM       Inj       :    1
                                           Inj Volume: 3.000 µl
Different Inj Volume from Sample Entry! Actual Inj Volume : 1.000 µl
Acq. Method     : E:\DATA\20200831\LC 2020-09-04 14-19-23\01PA_25_8_3.M
Last changed    : 9/4/2020 2:27:06 PM by SYSTEM
Analysis Method : E:\DATA\20200831\LC 2020-09-04 14-19-23\01PA_25_8_3.M (Sequence Method)
Last changed    : 9/4/2020 2:41:43 PM by SYSTEM
Additional Info  : Peak(s) manually integrated
=====

```

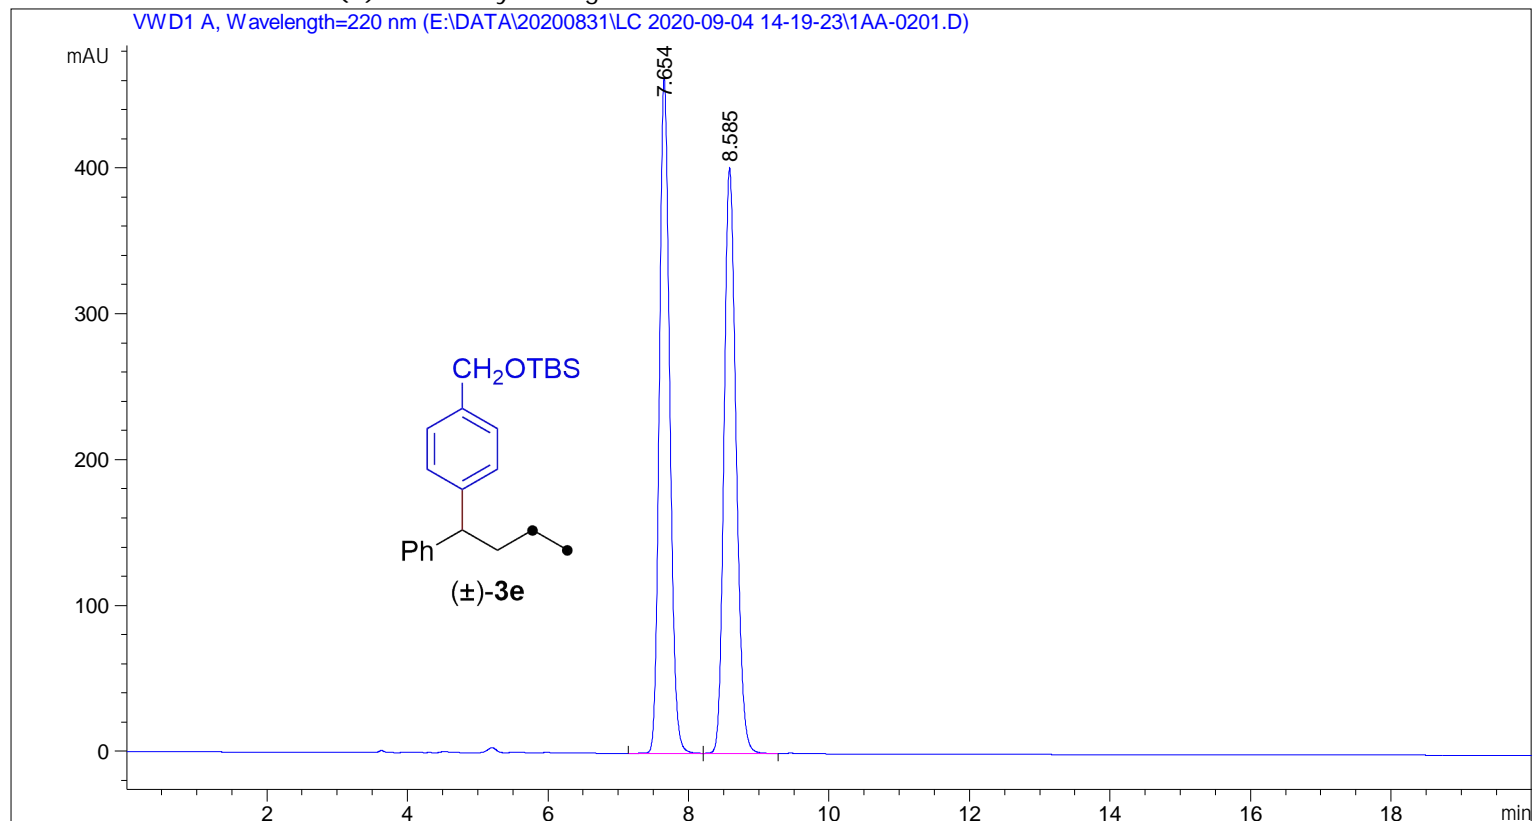

```

=====
                          Area Percent Report
=====

```

```

Sorted By      :      Signal
Multiplier     :      1.0000
Dilution      :      1.0000
Use Multiplier & Dilution Factor with ISTDs

```

Signal 1: VWD1 A, Wavelength=220 nm

| Peak # | RetTime [min] | Type | Width [min] | Area [mAU*s] | Height [mAU] | Area %  |
|--------|---------------|------|-------------|--------------|--------------|---------|
| 1      | 7.654         | BB   | 0.1607      | 4785.52490   | 462.56711    | 49.9838 |
| 2      | 8.585         | BB   | 0.1852      | 4788.62549   | 401.44867    | 50.0162 |

```
Totals :                      9574.15039  864.01578
```

Sample Name: YH-17-119-EE

```

=====
Acq. Operator   : SYSTEM                      Seq. Line :    3
Acq. Instrument : HPLC1260                   Location  : P1-A2
Injection Date  : 9/4/2020 3:03:07 PM        Inj       :    1
                                           Inj Volume: 3.000 µl
Different Inj Volume from Sample Entry! Actual Inj Volume : 1.000 µl
Acq. Method    : E:\DATA\20200831\LC 2020-09-04 14-19-23\01PA_25_8_3.M
Last changed   : 9/4/2020 2:27:06 PM by SYSTEM
Analysis Method: E:\DATA\20200831\LC 2020-09-04 14-19-23\01PA_25_8_3.M (Sequence Method)
Last changed   : 9/4/2020 2:41:43 PM by SYSTEM
Additional Info: Peak(s) manually integrated
=====

```

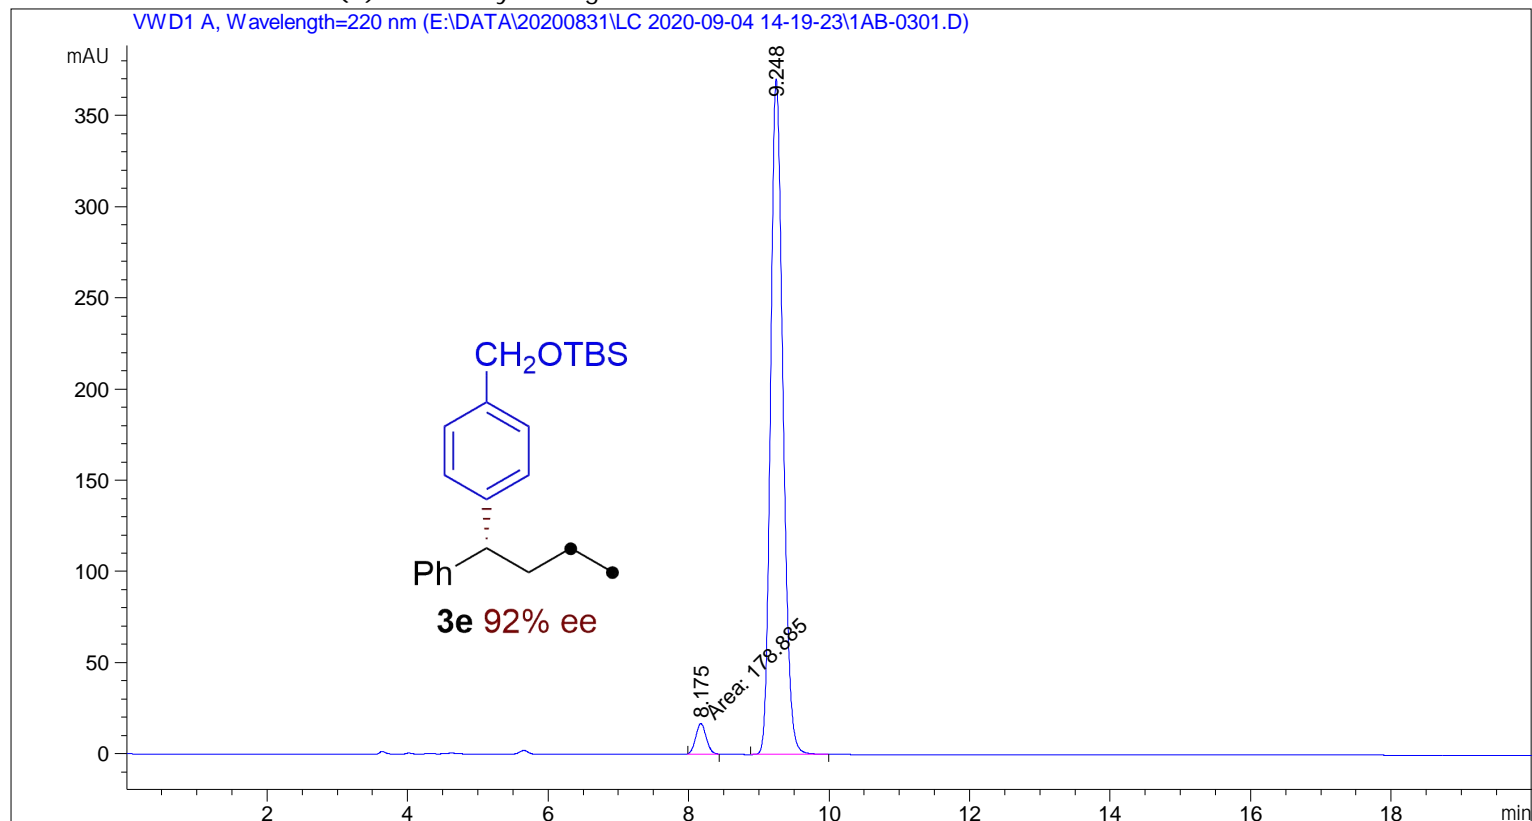

```

=====
                          Area Percent Report
=====

```

```

Sorted By      :      Signal
Multiplier     :      1.0000
Dilution       :      1.0000
Use Multiplier & Dilution Factor with ISTDs

```

Signal 1: VWD1 A, Wavelength=220 nm

| Peak # | RetTime [min] | Type | Width [min] | Area [mAU*s] | Height [mAU] | Area %  |
|--------|---------------|------|-------------|--------------|--------------|---------|
| 1      | 8.175         | FM   | 0.1756      | 178.88454    | 16.97795     | 3.7939  |
| 2      | 9.248         | BB   | 0.1889      | 4536.12598   | 370.32483    | 96.2061 |

```
Totals :                      4715.01051  387.30278
```

Sample Name: YH-17-108-RAC

```

=====
Acq. Operator   : SYSTEM                               Seq. Line :   26
Acq. Instrument : HPLC1260                           Location  :   P1-A1
Injection Date  : 8/29/2020 7:41:50 AM                Inj       :    1
                                                    Inj Volume: 3.000 µl
Different Inj Volume from Sample Entry! Actual Inj Volume : 1.000 µl
Acq. Method     : E:\DATA\20200828\LC 2020-08-28 17-26-16\51PA_35_10_1.M
Last changed    : 8/29/2020 7:59:24 AM by SYSTEM
                (modified after loading)
Analysis Method : E:\DATA\20200828\LC 2020-08-28 17-26-16\51PA_35_10_1.M (Sequence Method)
Last changed    : 8/29/2020 8:51:39 AM by SYSTEM
                (modified after loading)
Additional Info  : Peak(s) manually integrated
=====

```

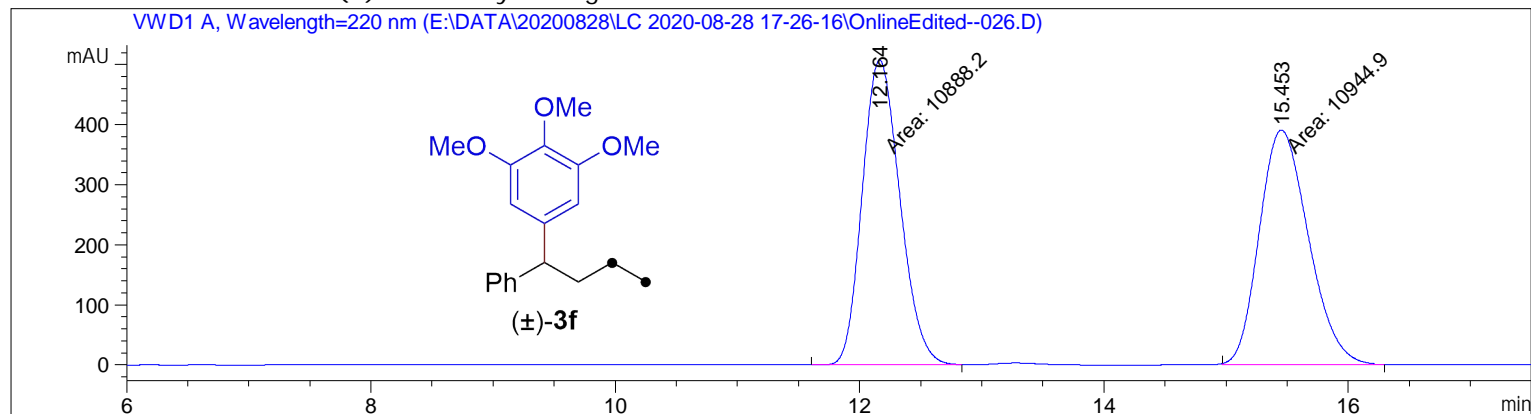

```

=====
                          Area Percent Report
=====

```

```

Sorted By      :      Signal
Multiplier     :      1.0000
Dilution       :      1.0000
Do not use Multiplier & Dilution Factor with ISTDs

```

Signal 1: VWD1 A, Wavelength=220 nm

| Peak # | RetTime [min] | Type | Width [min] | Area [mAU*s] | Height [mAU] | Area %  |
|--------|---------------|------|-------------|--------------|--------------|---------|
| 1      | 12.164        | MF   | 0.3575      | 1.08882e4    | 507.60840    | 49.8701 |
| 2      | 15.453        | MF   | 0.4665      | 1.09449e4    | 391.03992    | 50.1299 |

```
Totals :                2.18330e4    898.64832
```

```

=====
*** End of Report ***
=====

```

Sample Name: YH-17-108-EE

```

=====
Acq. Operator   : SYSTEM                      Seq. Line :   27
Acq. Instrument : HPLC1260                   Location  : P1-A2
Injection Date  : 8/29/2020 8:12:36 AM      Inj       :    1
                                           Inj Volume: 3.000 µl
Different Inj Volume from Sample Entry! Actual Inj Volume : 1.000 µl
Acq. Method     : E:\DATA\20200828\LC 2020-08-28 17-26-16\51PA_35_10_1.M
Last changed    : 8/29/2020 7:59:24 AM by SYSTEM
Analysis Method : E:\DATA\20200828\LC 2020-08-28 17-26-16\51PA_35_10_1.M (Sequence Method)
Last changed    : 8/29/2020 8:51:39 AM by SYSTEM
                 (modified after loading)
Additional Info : Peak(s) manually integrated

```

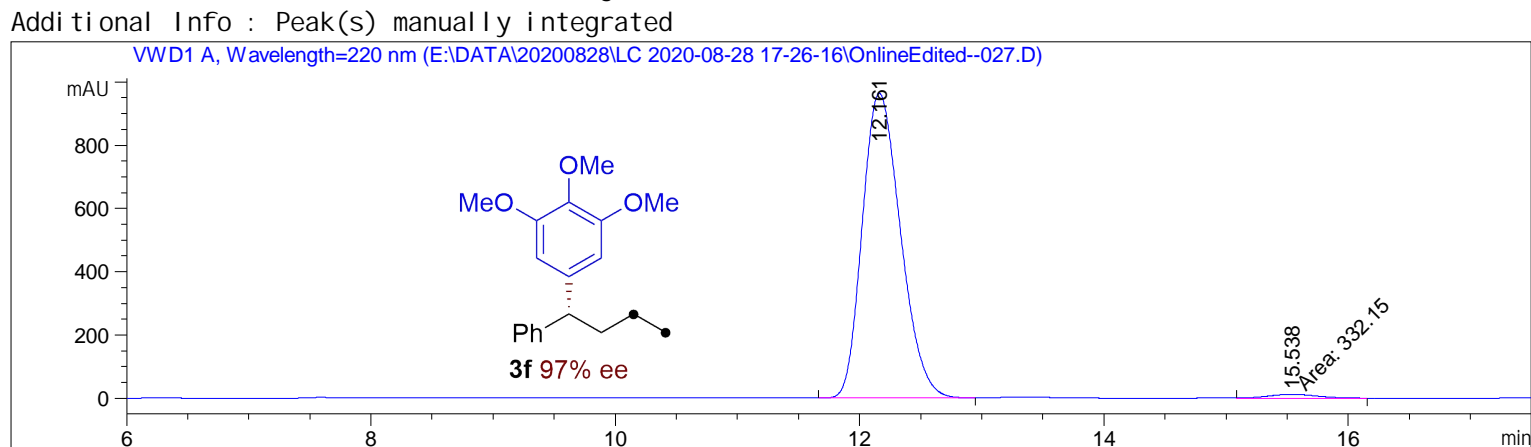

```

=====
                          Area Percent Report
=====

```

```

Sorted By      :      Signal
Multiplier     :      1.0000
Dilution       :      1.0000
Do not use Multiplier & Dilution Factor with ISTDs

```

Signal 1: VWD1 A, Wavelength=220 nm

| Peak # | RetTime [min] | Type | Width [min] | Area [mAU*s] | Height [mAU] | Area %  |
|--------|---------------|------|-------------|--------------|--------------|---------|
| 1      | 12.161        | BB   | 0.3418      | 2.09569e4    | 963.44781    | 98.4398 |
| 2      | 15.538        | MF   | 0.4604      | 332.14978    | 12.02373     | 1.5602  |

```
Totals :                      2.12890e4  975.47155
```

```

=====
*** End of Report ***

```



Sample Name: YH-17-116-RAC

```

=====
Acq. Operator   : SYSTEM                      Seq. Line :    6
Acq. Instrument : HPLC1260                   Location  : P1-A1
Injection Date  : 8/30/2020 9:34:17 PM      Inj       :    2
                                           Inj Volume: 3.000 µl
Different Inj Volume from Sample Entry! Actual Inj Volume : 1.000 µl
Acq. Method    : E:\DATA\20200829\LC 2020-08-30 17-08-41\51PA_30_5_1.M
Last changed   : 8/30/2020 8:45:42 PM by SYSTEM
Analysis Method: E:\DATA\20200829\LC 2020-08-30 17-08-41\51PA_30_5_1.M (Sequence Method)
Last changed   : 8/30/2020 10:35:01 PM by SYSTEM
                (modified after loading)
Additional Info : Peak(s) manually integrated
  
```

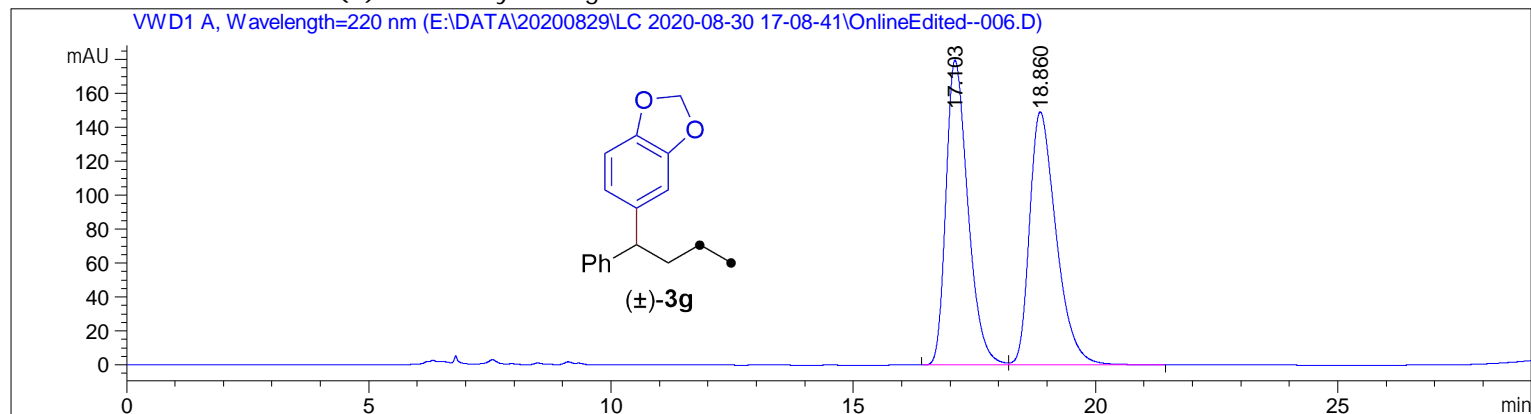

```

=====
                          Area Percent Report
=====
  
```

```

Sorted By      :      Signal
Multiplier     :      1.0000
Dilution       :      1.0000
Do not use Multiplier & Dilution Factor with ISTDs
  
```

Signal 1: VWD1 A, Wavelength=220 nm

| Peak # | RetTime [min] | Type | Width [min] | Area [mAU*s] | Height [mAU] | Area %  |
|--------|---------------|------|-------------|--------------|--------------|---------|
| 1      | 17.103        | BV   | 0.4842      | 5670.10205   | 179.65312    | 49.8935 |
| 2      | 18.860        | VB   | 0.5823      | 5694.31055   | 149.19333    | 50.1065 |

```
Totals :                      1.13644e4  328.84645
```

```

=====
*** End of Report ***
  
```

Sample Name: YH-17-116-EE

```

=====
Acq. Operator   : SYSTEM                      Seq. Line :    7
Acq. Instrument : HPLC1260                   Location  : P1-A2
Injection Date  : 8/30/2020 10:05:03 PM      Inj       :    1
                                           Inj Volume: 3.000 µl
Different Inj Volume from Sample Entry! Actual Inj Volume : 1.000 µl
Acq. Method     : E:\DATA\20200829\LC 2020-08-30 17-08-41\51PA_30_5_1.M
Last changed    : 8/30/2020 8:45:42 PM by SYSTEM
Analysis Method : E:\DATA\20200829\LC 2020-08-30 17-08-41\51PA_30_5_1.M (Sequence Method)
Last changed    : 8/30/2020 9:02:51 PM by SYSTEM
Additional Info : Peak(s) manually integrated
=====

```

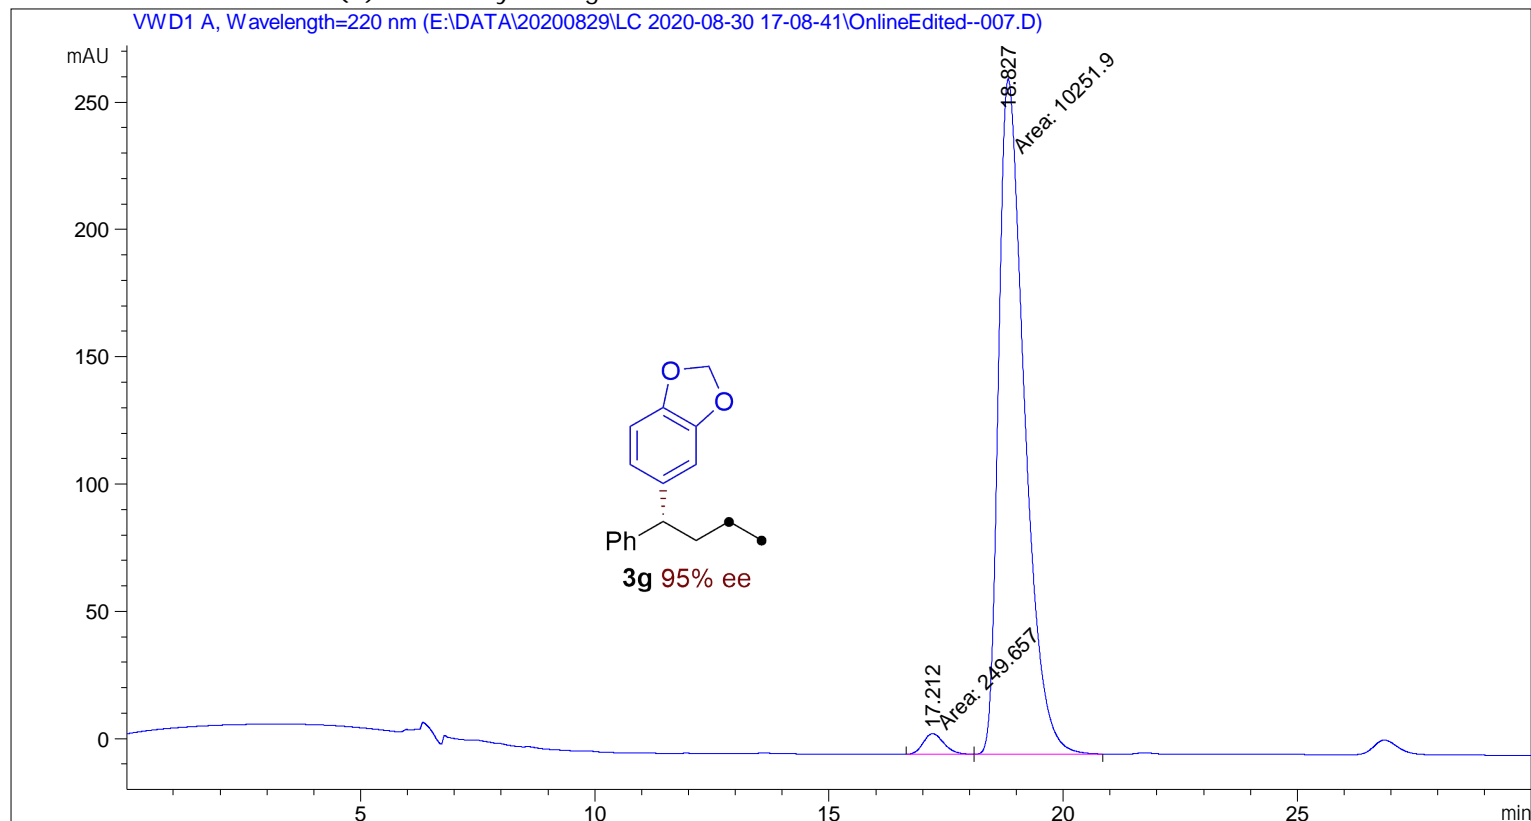

```

=====
                          Area Percent Report
=====

```

```

Sorted By      :      Signal
Multiplier     :      1.0000
Dilution       :      1.0000
Use Multiplier & Dilution Factor with ISTDs

```

Signal 1: VWD1 A, Wavelength=220 nm

| Peak # | RetTime [min] | Type | Width [min] | Area [mAU*s] | Height [mAU] | Area %  |
|--------|---------------|------|-------------|--------------|--------------|---------|
| 1      | 17.212        | FM   | 0.5118      | 249.65678    | 8.12981      | 2.3773  |
| 2      | 18.827        | MF   | 0.6441      | 1.02519e4    | 265.28772    | 97.6227 |

```
Totals :                      1.05016e4  273.41753
```

Sample Name: YH-17-112-RAC

```

=====
Acq. Operator   : SYSTEM                      Seq. Line :   16
Acq. Instrument : HPLC1260                   Location  :   P1-A1
Injection Date  : 8/31/2020 5:17:01 AM      Inj       :    1
                                                Inj Volume: 3.000 µl
Different Inj Volume from Sample Entry! Actual Inj Volume : 0.500 µl
Method          : E:\DATA\20200829\LC 2020-08-30 17-08-41\01PA_60_8_2.M (Sequence Method)
Last changed    : 8/30/2020 10:56:56 PM by SYSTEM
=====

```

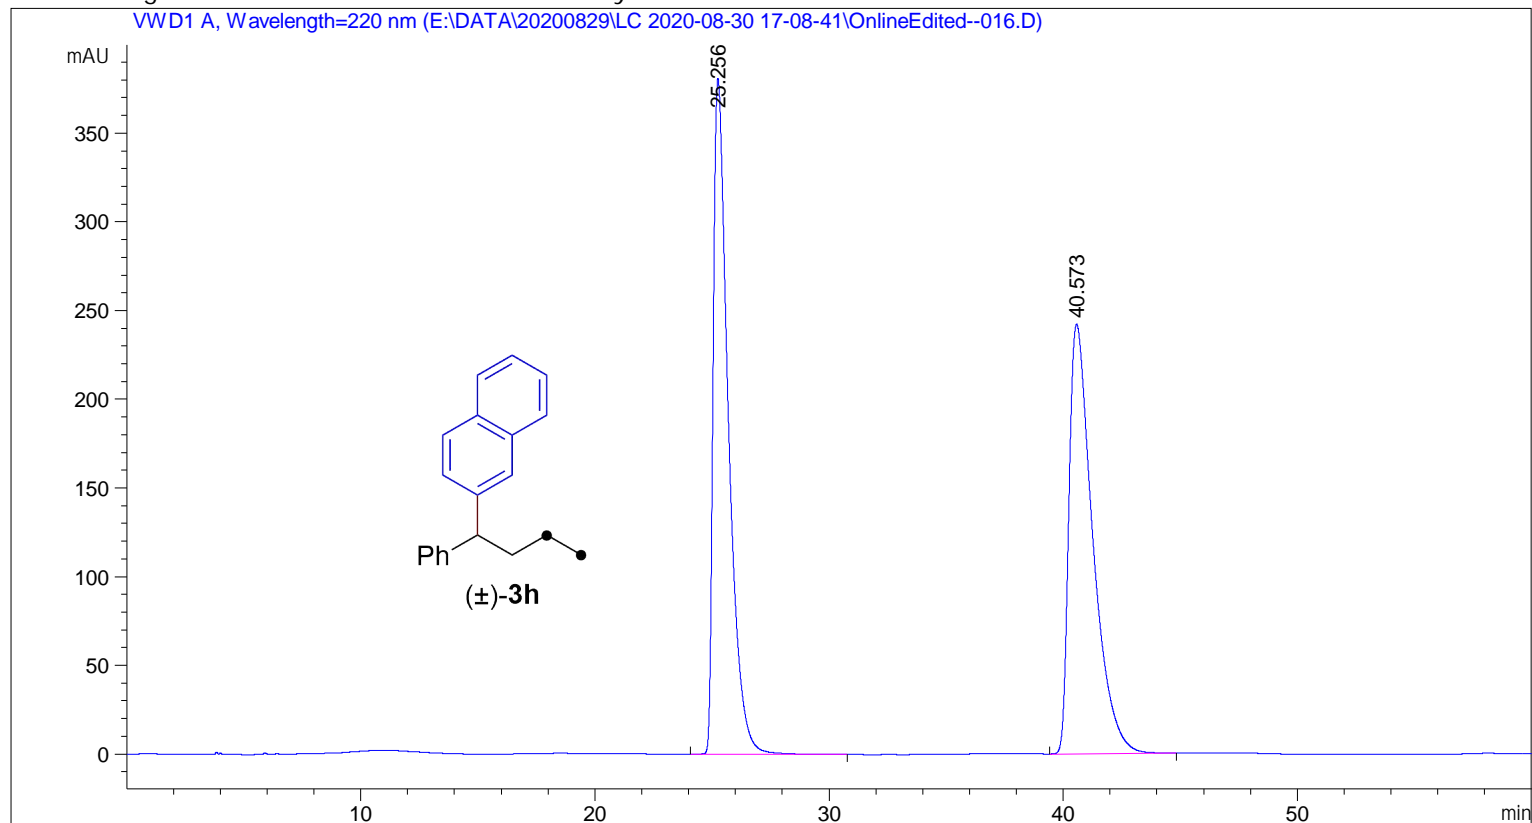

```

=====
                          Area Percent Report
=====

```

```

Sorted By      :      Signal
Multiplier     :      1.0000
Dilution      :      1.0000
Use Multiplier & Dilution Factor with ISTDs

```

Signal 1: VWD1 A, Wavelength=220 nm

| Peak # | RetTime [min] | Type | Width [min] | Area [mAU*s] | Height [mAU] | Area %  |
|--------|---------------|------|-------------|--------------|--------------|---------|
| 1      | 25.256        | BB   | 0.6736      | 1.71626e4    | 380.94769    | 50.1021 |
| 2      | 40.573        | BB   | 1.0553      | 1.70926e4    | 242.22771    | 49.8979 |

```
Totals :                      3.42552e4  623.17540
```

```

=====
*** End of Report ***

```

Sample Name: YH-17-112-EE

```

=====
Acq. Operator   : SYSTEM                      Seq. Line :   17
Acq. Instrument : HPLC1260                  Location  : P1-A2
Injection Date  : 8/31/2020 6:17:47 AM      Inj       :    1
                                           Inj Volume: 3.000 µl
Different Inj Volume from Sample Entry! Actual Inj Volume : 1.000 µl
Method          : E:\DATA\20200829\LC 2020-08-30 17-08-41\01PA_60_8_2.M (Sequence Method)
Last changed    : 8/30/2020 10:56:56 PM by SYSTEM
Additional Info : Peak(s) manually integrated
=====

```

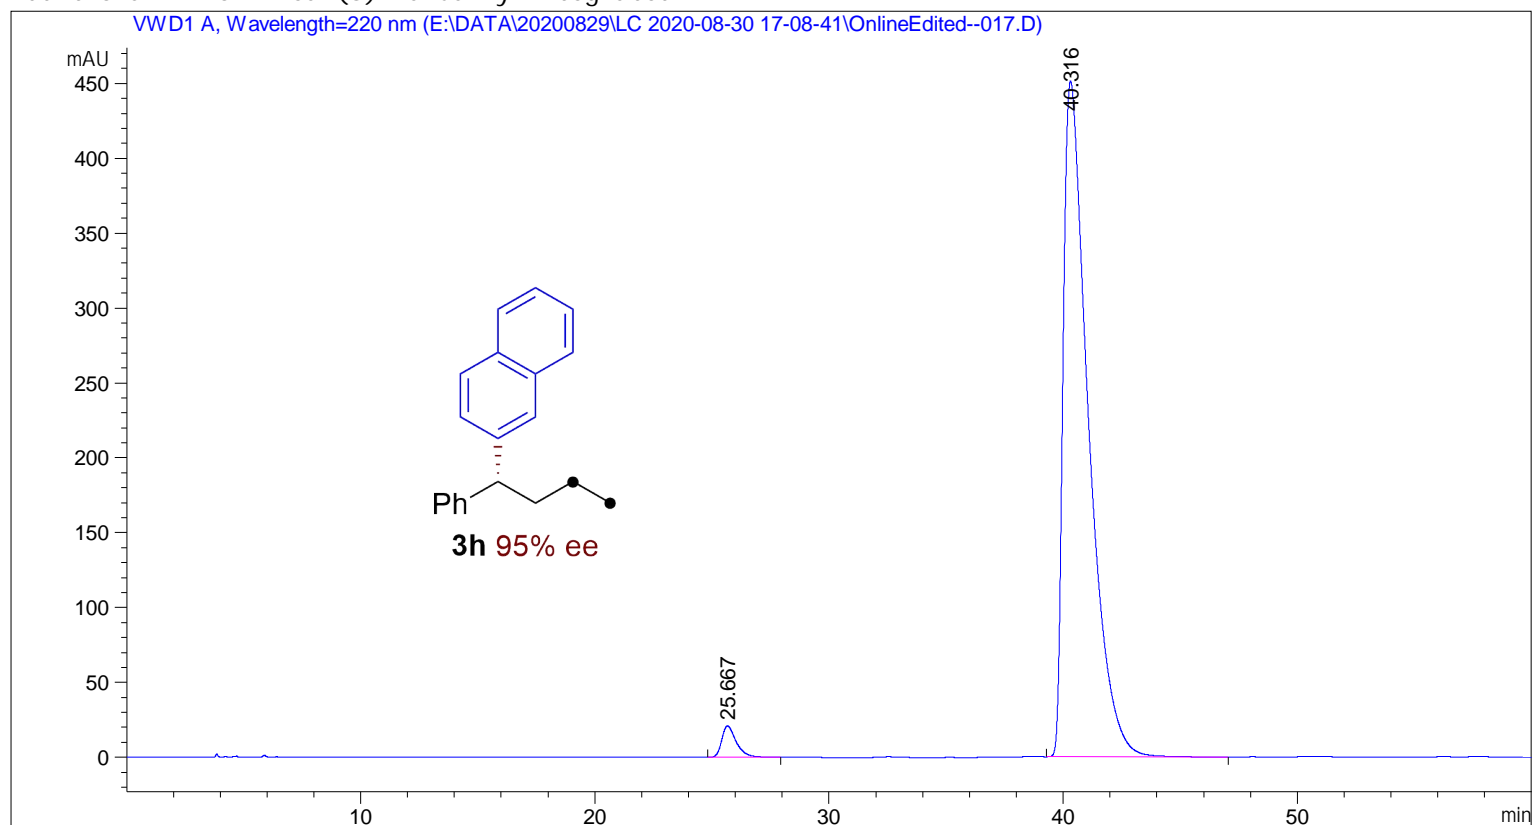

```

=====
                          Area Percent Report
=====

```

```

Sorted By      :      Signal
Multiplier     :      1.0000
Dilution       :      1.0000
Use Multiplier & Dilution Factor with ISTDs

```

Signal 1: VWD1 A, Wavelength=220 nm

| Peak # | RetTime [min] | Type | Width [min] | Area [mAU*s] | Height [mAU] | Area %  |
|--------|---------------|------|-------------|--------------|--------------|---------|
| 1      | 25.667        | BB   | 0.6395      | 893.69812    | 20.95575     | 2.5802  |
| 2      | 40.316        | BB   | 1.1145      | 3.37432e4    | 451.20450    | 97.4198 |

```
Totals :                      3.46369e4  472.16025
```

```

=====
*** End of Report ***

```

Sample Name: YH-17-109-RAC

```

=====
Acq. Operator   : SYSTEM                      Seq. Line :    3
Acq. Instrument : HPLC1260                   Location  : P1-A1
Injection Date  : 8/29/2020 11:36:05 AM      Inj       :    2
                                           Inj Volume: 3.000 µl
Different Inj Volume from Sample Entry! Actual Inj Volume : 0.500 µl
Acq. Method     : E:\DATA\20200828\LC 2020-08-29 10-07-26\1EtOH_35_5_1.M
Last changed    : 8/29/2020 11:01:44 AM by SYSTEM
Analysis Method : E:\DATA\20200828\LC 2020-08-29 10-07-26\1EtOH_35_5_1.M (Sequence Method)
Last changed    : 8/29/2020 4:38:45 PM by SYSTEM
                 (modified after loading)
Additional Info : Peak(s) manually integrated
  
```

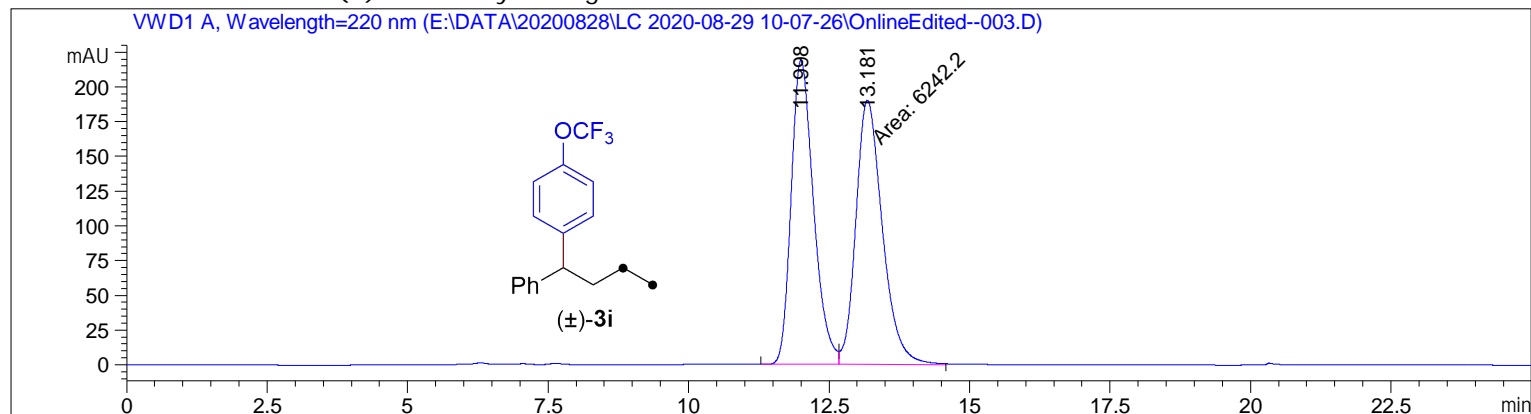

```

=====
                          Area Percent Report
=====
  
```

```

Sorted By      :      Signal
Multiplier     :      1.0000
Dilution       :      1.0000
Do not use Multiplier & Dilution Factor with ISTDs
  
```

Signal 1: VWD1 A, Wavelength=220 nm

| Peak # | RetTime [min] | Type | Width [min] | Area [mAU*s] | Height [mAU] | Area %  |
|--------|---------------|------|-------------|--------------|--------------|---------|
| 1      | 11.998        | BV   | 0.4249      | 6057.66504   | 218.84766    | 49.2499 |
| 2      | 13.181        | MF   | 0.5470      | 6242.19678   | 190.17905    | 50.7501 |

```
Totals :                      1.22999e4  409.02670
```

```

=====
*** End of Report ***
  
```

Sample Name: YH-17-109-EE

```

=====
Acq. Operator   : SYSTEM                               Seq. Line :    4
Acq. Instrument : HPLC1260                             Location  : P1-A2
Injection Date  : 8/29/2020 12:26:53 PM                Inj       :    1
                                                    Inj Volume: 3.000 µl
Different Inj Volume from Sample Entry! Actual Inj Volume : 1.000 µl
Acq. Method     : E:\DATA\20200828\LC 2020-08-29 10-07-26\1EtOH_35_5_1.M
Last changed    : 8/29/2020 11:01:44 AM by SYSTEM
Analysis Method : E:\DATA\20200828\LC 2020-08-29 10-07-26\1EtOH_35_5_1.M (Sequence Method)
Last changed    : 8/29/2020 4:38:45 PM by SYSTEM
                  (modified after loading)
Additional Info : Peak(s) manually integrated
  
```

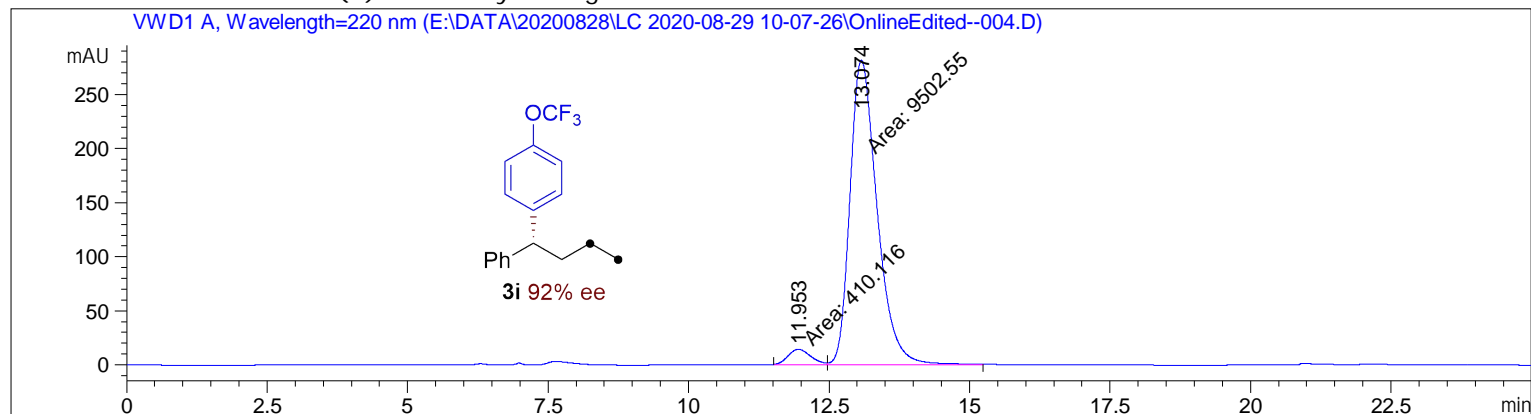

```

=====
                          Area Percent Report
=====
  
```

```

Sorted By      :      Signal
Multiplier     :      1.0000
Dilution      :      1.0000
Do not use Multiplier & Dilution Factor with ISTDs
  
```

Signal 1: VWD1 A, Wavelength=220 nm

| Peak # | RetTime [min] | Type | Width [min] | Area [mAU*s] | Height [mAU] | Area %  |
|--------|---------------|------|-------------|--------------|--------------|---------|
| 1      | 11.953        | FM   | 0.4739      | 410.11621    | 14.42195     | 4.1373  |
| 2      | 13.074        | MF   | 0.5618      | 9502.54980   | 281.88467    | 95.8627 |

```
Totals :                      9912.66602  296.30663
```

```

=====
*** End of Report ***
  
```

Sample Name: YH-17-126-RAC

```

=====
Acq. Operator   : SYSTEM                      Seq. Line :   69
Acq. Instrument : HPLC1260                   Location  : P1-A7
Injection Date  : 9/8/2020 5:49:33 AM        Inj       :    1
                                           Inj Volume: 3.000 µl
Different Inj Volume from Sample Entry! Actual Inj Volume : 1.000 µl
Acq. Method     : E:\DATA\20200905\LC 2020-09-06 15-18-12\01PA_50_4_3.M
Last changed    : 9/7/2020 9:42:12 AM by SYSTEM
Analysis Method : E:\DATA\20200905\LC 2020-09-06 15-18-12\01PA_50_4_3.M (Sequence Method)
Last changed    : 9/8/2020 11:31:07 AM by SYSTEM
                 (modified after loading)
Additional Info : Peak(s) manually integrated

```

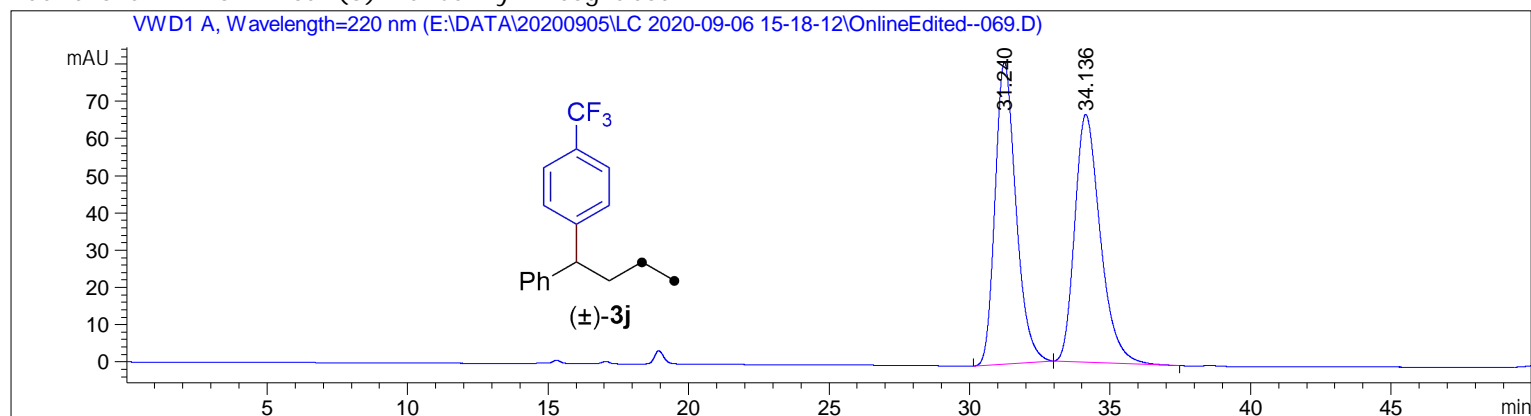

```

=====
                          Area Percent Report
=====

```

```

Sorted By      :      Signal
Multiplier     :      1.0000
Dilution      :      1.0000
Do not use Multiplier & Dilution Factor with ISTDs

```

Signal 1: VWD1 A, Wavelength=220 nm

| Peak # | RetTime [min] | Type | Width [min] | Area [mAU*s] | Height [mAU] | Area %  |
|--------|---------------|------|-------------|--------------|--------------|---------|
| 1      | 31.240        | BB   | 0.7946      | 4194.71387   | 81.07690     | 49.9003 |
| 2      | 34.136        | BB   | 0.9644      | 4211.47217   | 66.53973     | 50.0997 |

```
Totals :                      8406.18604  147.61663
```

```

=====
*** End of Report ***

```

Sample Name: YH-17-126-EE

```

=====
Acq. Operator   : SYSTEM                               Seq. Line :   70
Acq. Instrument : HPLC1260                             Location  : P1-A8
Injection Date  : 9/8/2020 6:40:17 AM                 Inj       :    1
                                                    Inj Volume: 3.000 µl
Different Inj Volume from Sample Entry! Actual Inj Volume : 1.000 µl
Acq. Method     : E:\DATA\20200905\LC 2020-09-06 15-18-12\01PA_50_4_3.M
Last changed    : 9/7/2020 9:42:12 AM by SYSTEM
Analysis Method : E:\DATA\20200905\LC 2020-09-06 15-18-12\01PA_50_4_3.M (Sequence Method)
Last changed    : 9/8/2020 11:31:07 AM by SYSTEM
                  (modified after loading)
Additional Info : Peak(s) manually integrated

```

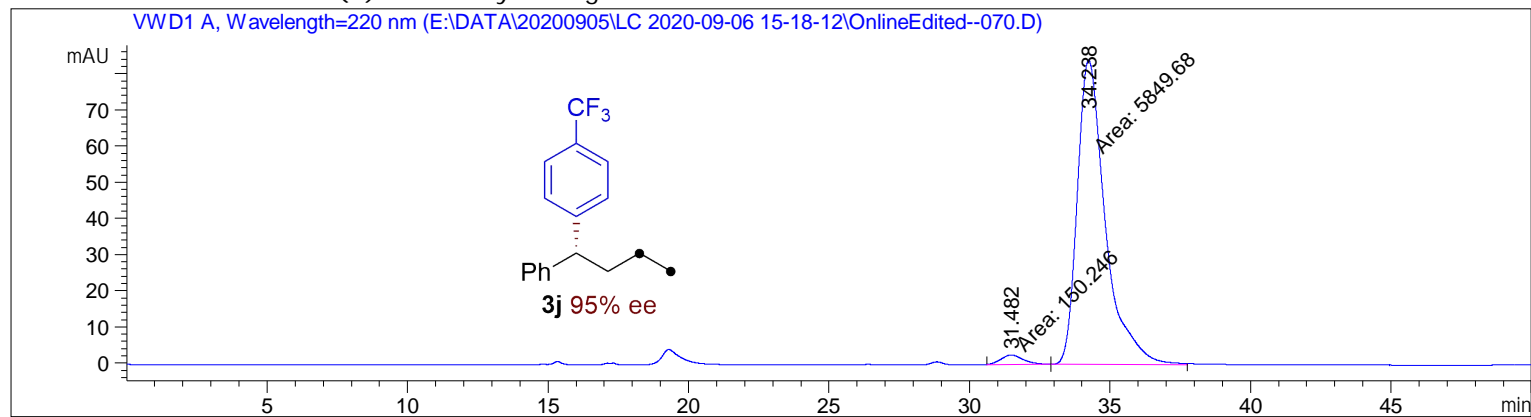

```

=====
                          Area Percent Report
=====

```

```

Sorted By      :      Signal
Multiplier     :      1.0000
Dilution      :      1.0000
Do not use Multiplier & Dilution Factor with ISTDs

```

Signal 1: VWD1 A, Wavelength=220 nm

| Peak # | RetTime [min] | Type | Width [min] | Area [mAU*s] | Height [mAU] | Area %  |
|--------|---------------|------|-------------|--------------|--------------|---------|
| 1      | 31.482        | FM   | 0.9381      | 150.24557    | 2.66936      | 2.5041  |
| 2      | 34.238        | MF   | 1.1592      | 5849.67920   | 84.10281     | 97.4959 |

```
Totals :                      5999.92477    86.77216
```

```

=====
*** End of Report ***

```



Sample Name: YH-17-102-RAC

```

=====
Acq. Operator   : SYSTEM                               Seq. Line :   15
Acq. Instrument : HPLC1260                           Location  :   P1-A1
Injection Date  : 8/26/2020 10:26:09 PM              Inj       :    1
                                                    Inj Volume: 3.000 µl
Different Inj Volume from Sample Entry! Actual Inj Volume : 1.000 µl
Acq. Method     : E:\DATA\20200823\LC 2020-08-26 16-46-12\11PA_40_8_1.M
Last changed    : 8/26/2020 10:49:00 PM by SYSTEM
                  (modified after loading)
Analysis Method : E:\DATA\20200823\LC 2020-08-26 16-46-12\11PA_40_8_1.M (Sequence Method)
Last changed    : 8/27/2020 10:35:59 AM by SYSTEM
                  (modified after loading)
Additional Info : Peak(s) manually integrated
=====

```

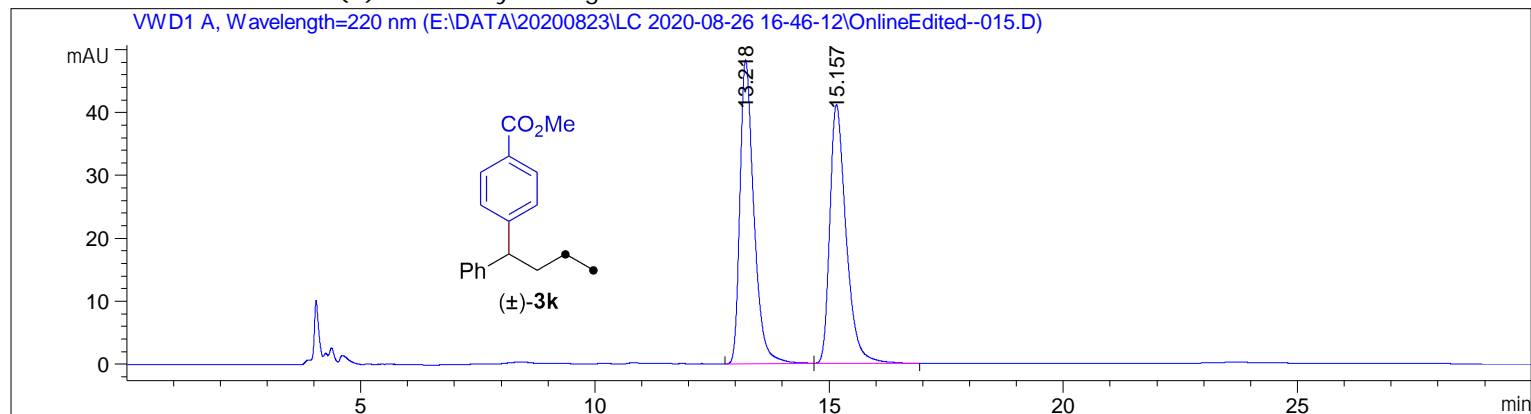

```

=====
                          Area Percent Report
=====

```

```

Sorted By      :      Signal
Multiplier     :      1.0000
Dilution       :      1.0000
Do not use Multiplier & Dilution Factor with ISTDs

```

Signal 1: VWD1 A, Wavelength=220 nm

| Peak # | RetTime [min] | Type | Width [min] | Area [mAU*s] | Height [mAU] | Area %  |
|--------|---------------|------|-------------|--------------|--------------|---------|
| 1      | 13.218        | BB   | 0.3101      | 997.52032    | 48.26073     | 50.0790 |
| 2      | 15.157        | BB   | 0.3641      | 994.37354    | 41.12718     | 49.9210 |

```
Totals :                1991.89386    89.38791
```

```

=====
*** End of Report ***
=====

```

Sample Name: YH-17-102-EE

```

=====
Acq. Operator   : SYSTEM                      Seq. Line :   16
Acq. Instrument : HPLC1260                  Location  : P1-A2
Injection Date  : 8/26/2020 10:56:55 PM     Inj       :    1
                                           Inj Volume: 3.000 µl
Different Inj Volume from Sample Entry! Actual Inj Volume : 1.000 µl
Acq. Method     : E:\DATA\20200823\LC 2020-08-26 16-46-12\11PA_40_8_1.M
Last changed    : 8/26/2020 10:49:00 PM by SYSTEM
Analysis Method : E:\DATA\20200823\LC 2020-08-26 16-46-12\11PA_40_8_1.M (Sequence Method)
Last changed    : 8/27/2020 10:35:59 AM by SYSTEM
                 (modified after loading)
Additional Info : Peak(s) manually integrated
  
```

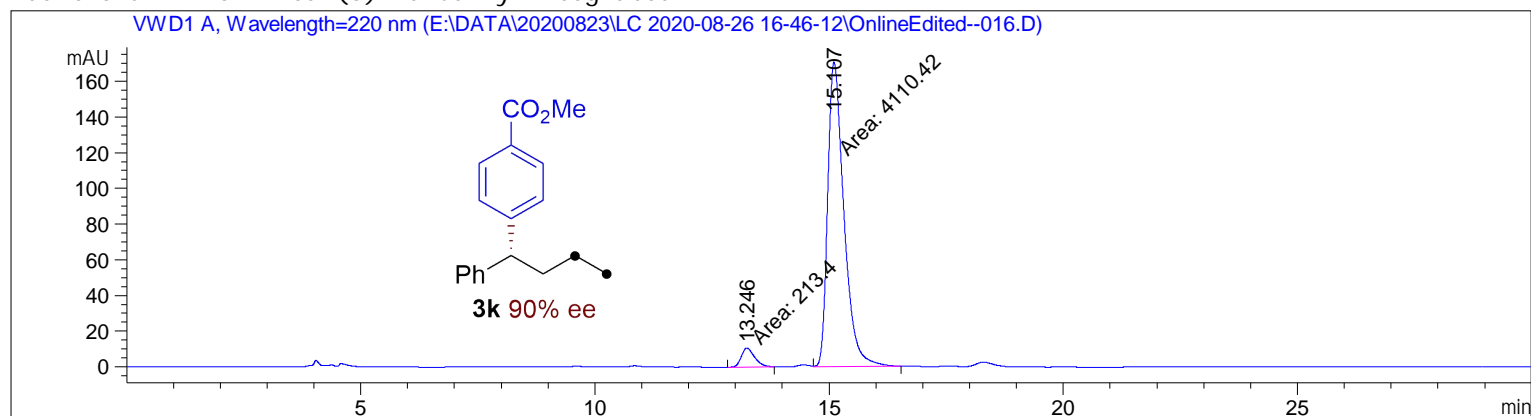

```

=====
                          Area Percent Report
=====
  
```

```

Sorted By      :      Signal
Multiplier     :      1.0000
Dilution      :      1.0000
Do not use Multiplier & Dilution Factor with ISTDs
  
```

Signal 1: VWD1 A, Wavelength=220 nm

| Peak # | RetTime [min] | Type | Width [min] | Area [mAU*s] | Height [mAU] | Area %  |
|--------|---------------|------|-------------|--------------|--------------|---------|
| 1      | 13.246        | MF   | 0.3319      | 213.40047    | 10.71743     | 4.9355  |
| 2      | 15.107        | FM   | 0.4015      | 4110.41992   | 170.60970    | 95.0645 |

```
Totals :                      4323.82039  181.32712
```

```

=====
*** End of Report ***
  
```

Sample Name: YH-17-121-RAC

```

=====
Acq. Operator   : SYSTEM                               Seq. Line : 133
Acq. Instrument : HPLC1260                             Location  : P1-B1
Injection Date  : 9/9/2020 10:12:47 AM                Inj       : 1
                                                    Inj Volume: 3.000 µl
Different Inj Volume from Sample Entry! Actual Inj Volume : 1.000 µl
Acq. Method     : E:\DATA\20200905\LC 2020-09-06 15-18-12\51PA IN PENTANE_40_5_4.M
Last changed    : 9/9/2020 10:12:24 AM by SYSTEM
                  (modified after loading)
Analysis Method : E:\DATA\20200905\LC 2020-09-06 15-18-12\51PA IN PENTANE_40_5_4.M (Sequence
                  Method)
Last changed    : 11/25/2021 5:03:12 PM by SYSTEM
                  (modified after loading)
Additional Info : Peak(s) manually integrated
  
```

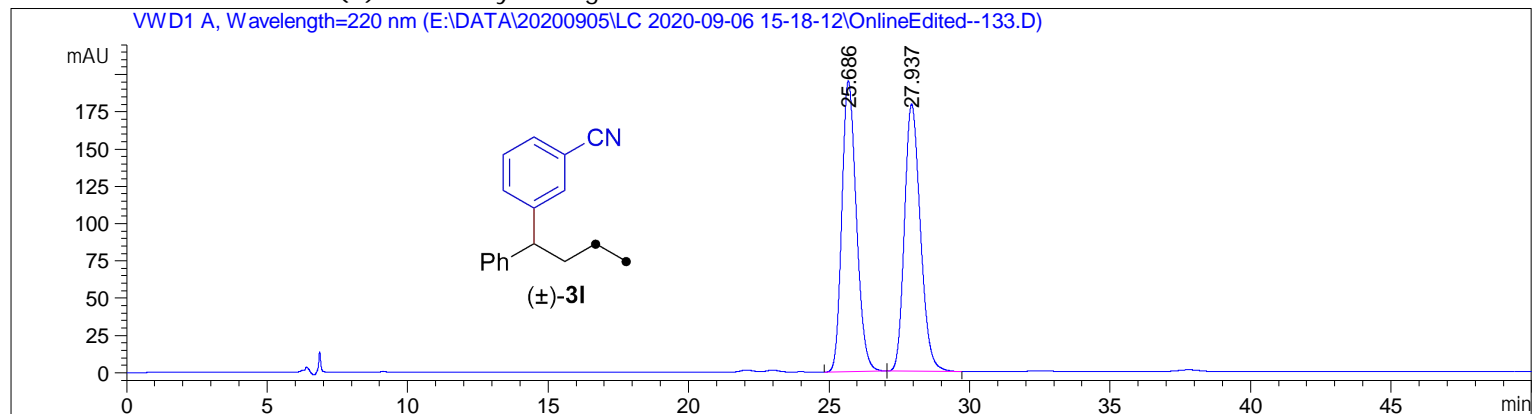

```

=====
                          Area Percent Report
=====
  
```

```

Sorted By      :      Signal
Multiplier     :      1.0000
Dilution      :      1.0000
Do not use Multiplier & Dilution Factor with ISTDs
  
```

Signal 1: VWD1 A, Wavelength=220 nm

| Peak # | RetTime [min] | Type | Width [min] | Area [mAU*s] | Height [mAU] | Area %  |
|--------|---------------|------|-------------|--------------|--------------|---------|
| 1      | 25.686        | BB   | 0.5548      | 7002.60303   | 195.05595    | 49.7788 |
| 2      | 27.937        | BB   | 0.6088      | 7064.82617   | 179.27194    | 50.2212 |

```
Totals :                1.40674e4    374.32790
```

```

=====
*** End of Report ***
  
```

Sample Name: YH-17-121-EE

```

=====
Acq. Operator   : SYSTEM                               Seq. Line : 134
Acq. Instrument : HPLC1260                           Location  : P1-B2
Injection Date  : 9/9/2020 11:03:32 AM                Inj       : 1
                                                    Inj Volume: 3.000 µl
Different Inj Volume from Sample Entry! Actual Inj Volume : 1.000 µl
Acq. Method     : E:\DATA\20200905\LC 2020-09-06 15-18-12\51PA IN PENTANE_40_5_4.M
Last changed    : 9/9/2020 10:12:24 AM by SYSTEM
Analysis Method : E:\DATA\20200905\LC 2020-09-06 15-18-12\51PA IN PENTANE_40_5_4.M (Sequence
                  Method)
Last changed    : 11/25/2021 5:03:48 PM by SYSTEM
                  (modified after loading)
Additional Info : Peak(s) manually integrated
=====

```

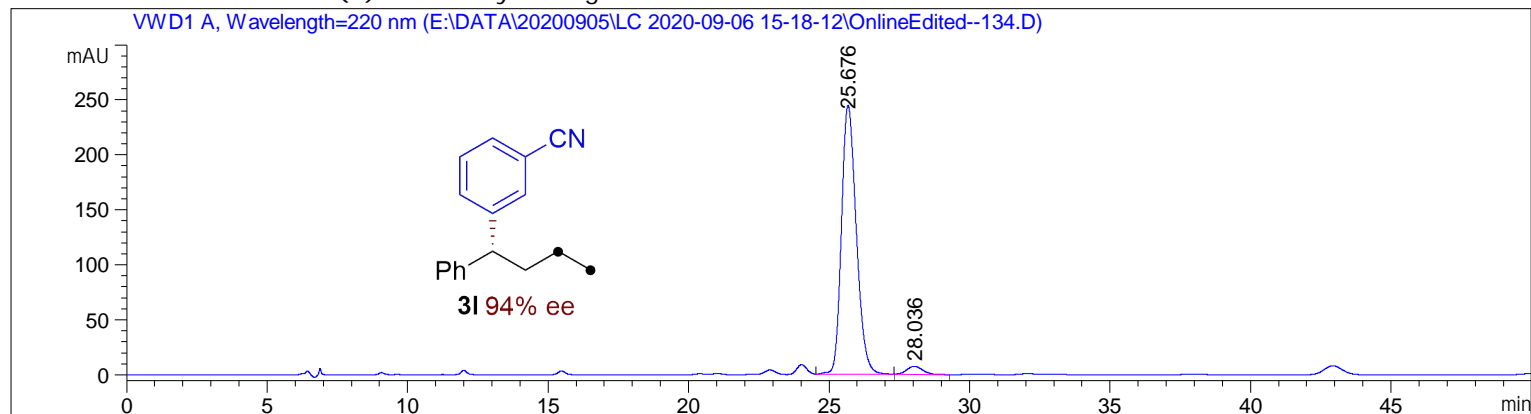

```

=====
                          Area Percent Report
=====

```

```

Sorted By      :      Signal
Multiplier     :      1.0000
Dilution       :      1.0000
Do not use Multiplier & Dilution Factor with ISTDs

```

Signal 1: VWD1 A, Wavelength=220 nm

| Peak # | RetTime [min] | Type | Width [min] | Area [mAU*s] | Height [mAU] | Area %  |
|--------|---------------|------|-------------|--------------|--------------|---------|
| 1      | 25.676        | VB   | 0.5684      | 8981.67285   | 244.61131    | 96.9631 |
| 2      | 28.036        | BB   | 0.5930      | 281.30905    | 7.29287      | 3.0369  |

```
Totals :                      9262.98190  251.90418
```

```

=====
*** End of Report ***
=====

```

Sample Name: YH-17-118-RAC

```

=====
Acq. Operator   : SYSTEM                               Seq. Line :   21
Acq. Instrument : HPLC1260                             Location  : P1-B3
Injection Date  : 9/1/2020 4:47:15 AM                  Inj       :    1
                                                    Inj Volume: 3.000 µl
Different Inj Volume from Sample Entry! Actual Inj Volume : 1.000 µl
Acq. Method     : E:\DATA\20200831\LC 2020-08-31 17-14-33\201PA_20_0.8_1.M
Last changed    : 8/31/2020 10:07:17 PM by SYSTEM
Analysis Method : E:\DATA\20200831\LC 2020-08-31 17-14-33\201PA_20_0.8_1.M (Sequence Method)
Last changed    : 9/1/2020 8:54:30 AM by SYSTEM
                  (modified after loading)
Additional Info : Peak(s) manually integrated
  
```

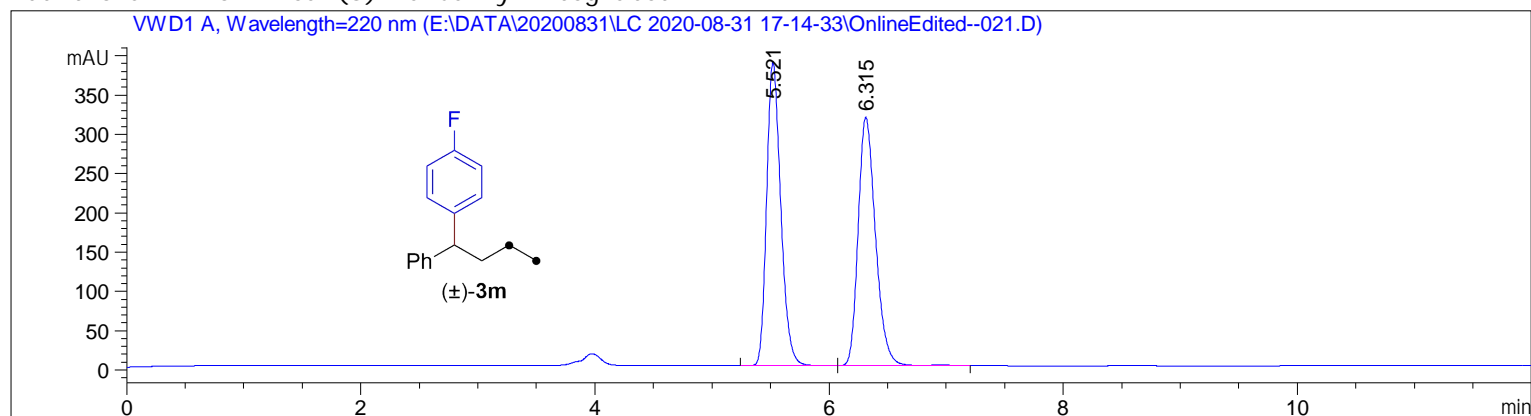

```

=====
                          Area Percent Report
=====
  
```

```

Sorted By      :      Signal
Multiplier     :      1.0000
Dilution       :      1.0000
Do not use Multiplier & Dilution Factor with ISTDs
  
```

Signal 1: VWD1 A, Wavelength=220 nm

| Peak # | RetTime [min] | Type | Width [min] | Area [mAU*s] | Height [mAU] | Area %  |
|--------|---------------|------|-------------|--------------|--------------|---------|
| 1      | 5.521         | BB   | 0.1286      | 3231.76294   | 386.16724    | 49.8112 |
| 2      | 6.315         | BV R | 0.1582      | 3256.26318   | 316.06775    | 50.1888 |

```
Totals :                      6488.02612  702.23499
```

```

=====
*** End of Report ***
  
```

Sample Name: YH-17-118-EE

```

=====
Acq. Operator   : SYSTEM                               Seq. Line :   22
Acq. Instrument : HPLC1260                             Location  : P1-B4
Injection Date  : 9/1/2020 5:08:01 AM                 Inj       :    1
                                                    Inj Volume: 3.000 µl
Different Inj Volume from Sample Entry! Actual Inj Volume : 1.000 µl
Acq. Method     : E:\DATA\20200831\LC 2020-08-31 17-14-33\201PA_20_0.8_1.M
Last changed    : 8/31/2020 10:07:17 PM by SYSTEM
Analysis Method : E:\DATA\20200831\LC 2020-08-31 17-14-33\201PA_20_0.8_1.M (Sequence Method)
Last changed    : 9/1/2020 8:54:30 AM by SYSTEM
                  (modified after loading)
Additional Info : Peak(s) manually integrated
  
```

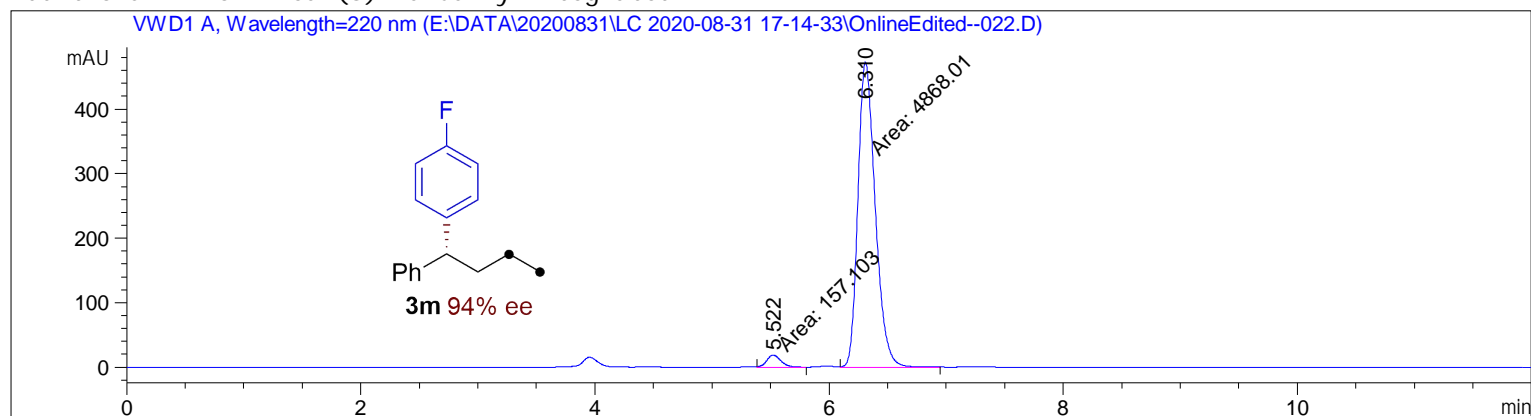

```

=====
                          Area Percent Report
=====
  
```

```

Sorted By      :      Signal
Multiplier     :      1.0000
Dilution       :      1.0000
Do not use Multiplier & Dilution Factor with ISTDs
  
```

Signal 1: VWD1 A, Wavelength=220 nm

| Peak # | RetTime [min] | Type | Width [min] | Area [mAU*s] | Height [mAU] | Area %  |
|--------|---------------|------|-------------|--------------|--------------|---------|
| 1      | 5.522         | FM   | 0.1391      | 157.10300    | 18.82444     | 3.1264  |
| 2      | 6.310         | MF   | 0.1716      | 4868.01270   | 472.90283    | 96.8736 |

```
Totals :                5025.11569  491.72727
```

```

=====
*** End of Report ***
  
```

Sample Name: YH-17-111-RAC

```

=====
Acq. Operator   : SYSTEM                               Seq. Line :    6
Acq. Instrument : HPLC1260                             Location  :   P1-A3
Injection Date  : 8/29/2020 1:38:25 PM                 Inj       :    1
                                                    Inj Volume: 3.000 µl
Different Inj Volume from Sample Entry! Actual Inj Volume : 0.500 µl
Acq. Method     : E:\DATA\20200828\LC 2020-08-29 10-07-26\51PA_20_10_1.M
Last changed    : 8/29/2020 10:48:42 AM by SYSTEM
Analysis Method : E:\DATA\20200828\LC 2020-08-29 10-07-26\51PA_20_10_1.M (Sequence Method)
Last changed    : 8/29/2020 3:25:50 PM by SYSTEM
                  (modified after loading)
Additional Info : Peak(s) manually integrated
  
```

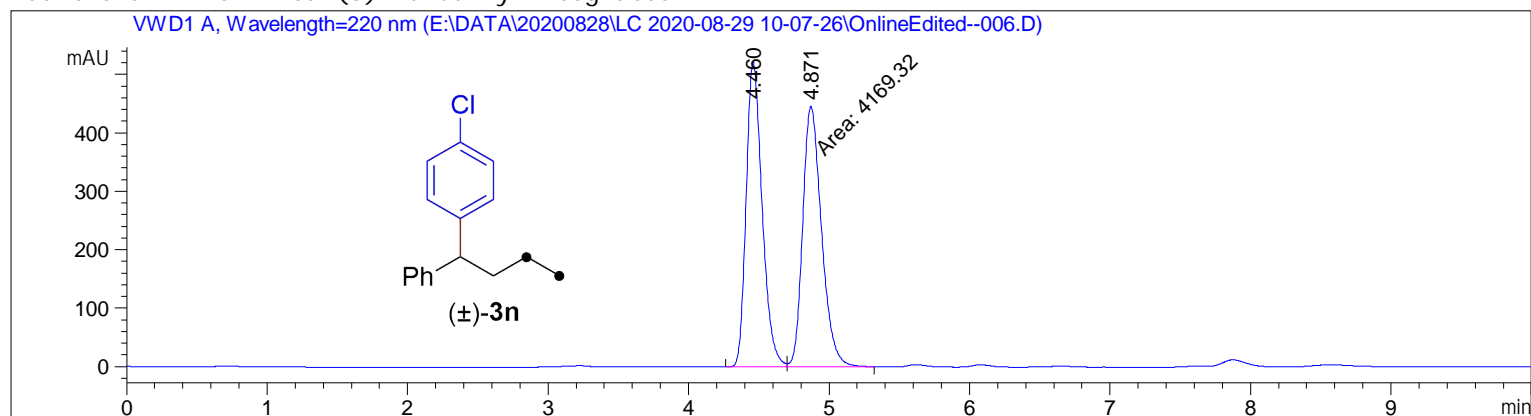

```

=====
                          Area Percent Report
=====
  
```

```

Sorted By      :      Signal
Multiplier     :      1.0000
Dilution      :      1.0000
Do not use Multiplier & Dilution Factor with ISTDs
  
```

Signal 1: VWD1 A, Wavelength=220 nm

| Peak # | RetTime [min] | Type | Width [min] | Area [mAU*s] | Height [mAU] | Area %  |
|--------|---------------|------|-------------|--------------|--------------|---------|
| 1      | 4.460         | BV   | 0.1215      | 4133.57275   | 521.56091    | 49.7847 |
| 2      | 4.871         | MF   | 0.1557      | 4169.31836   | 446.18970    | 50.2153 |

```
Totals :                      8302.89111  967.75061
```

```

=====
*** End of Report ***
  
```

Sample Name: YH-17-111-EE

```

=====
Acq. Operator   : SYSTEM                      Seq. Line :    7
Acq. Instrument : HPLC1260                   Location  : P1-A4
Injection Date  : 8/29/2020 1:59:10 PM      Inj       :    1
                                           Inj Volume: 3.000 µl
Different Inj Volume from Sample Entry! Actual Inj Volume : 1.000 µl
Acq. Method     : E:\DATA\20200828\LC 2020-08-29 10-07-26\51PA_20_10_1.M
Last changed    : 8/29/2020 2:14:17 PM by SYSTEM
                 (modified after loading)
Analysis Method : E:\DATA\20200828\LC 2020-08-29 10-07-26\51PA_20_10_1.M (Sequence Method)
Last changed    : 8/29/2020 3:26:45 PM by SYSTEM
                 (modified after loading)
Additional Info : Peak(s) manually integrated
=====

```

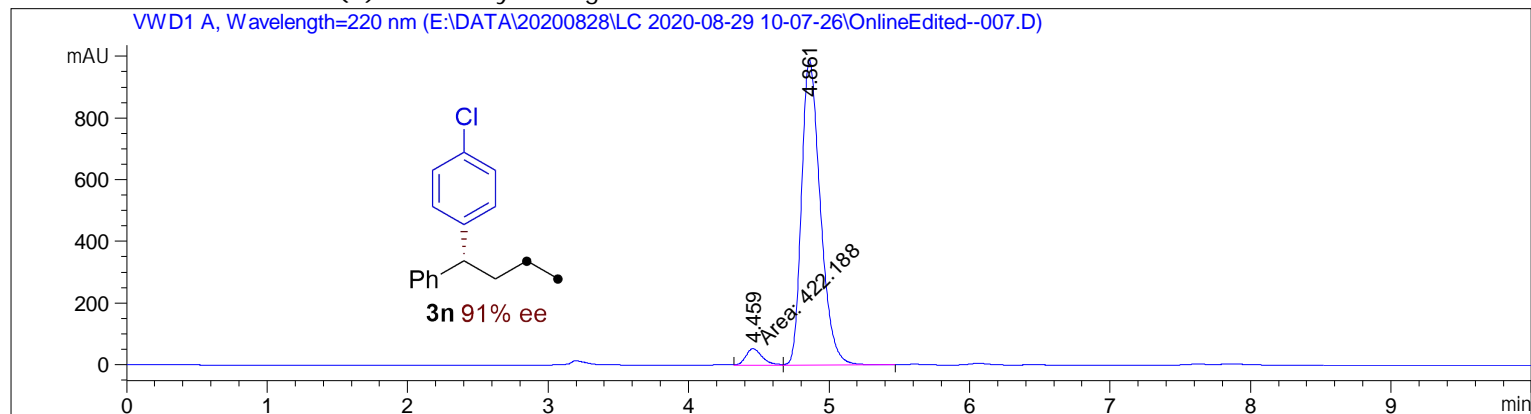

```

=====
                          Area Percent Report
=====

```

```

Sorted By      :      Signal
Multiplier     :      1.0000
Dilution       :      1.0000
Do not use Multiplier & Dilution Factor with ISTDs

```

Signal 1: VWD1 A, Wavelength=220 nm

| Peak # | RetTime [min] | Type | Width [min] | Area [mAU*s] | Height [mAU] | Area %  |
|--------|---------------|------|-------------|--------------|--------------|---------|
| 1      | 4.459         | FM   | 0.1327      | 422.18765    | 53.02592     | 4.3768  |
| 2      | 4.861         | VB   | 0.1428      | 9223.73828   | 988.79614    | 95.6232 |

```
Totals :                      9645.92593 1041.82207
```

```

=====
*** End of Report ***
=====

```



Sample Name: YH-17-125-RAC

```

=====
Acq. Operator   : SYSTEM                      Seq. Line :   14
Acq. Instrument : HPLC1260                   Location  : P1-A1
Injection Date  : 9/4/2020 6:46:37 PM        Inj       :    1
                                           Inj Volume: 3.000 µl

Different Inj Volume from Sample Entry! Actual Inj Volume : 1.000 µl
Acq. Method     : E:\DATA\20200831\LC 2020-09-04 14-19-23\11PA_20_8_3.M
Last changed    : 9/4/2020 6:17:46 PM by SYSTEM
Analysis Method : E:\DATA\20200831\LC 2020-09-04 14-19-23\11PA_20_8_3.M (Sequence Method)
Last changed    : 9/4/2020 7:31:13 PM by SYSTEM
                 (modified after loading)
Additional Info : Peak(s) manually integrated
  
```

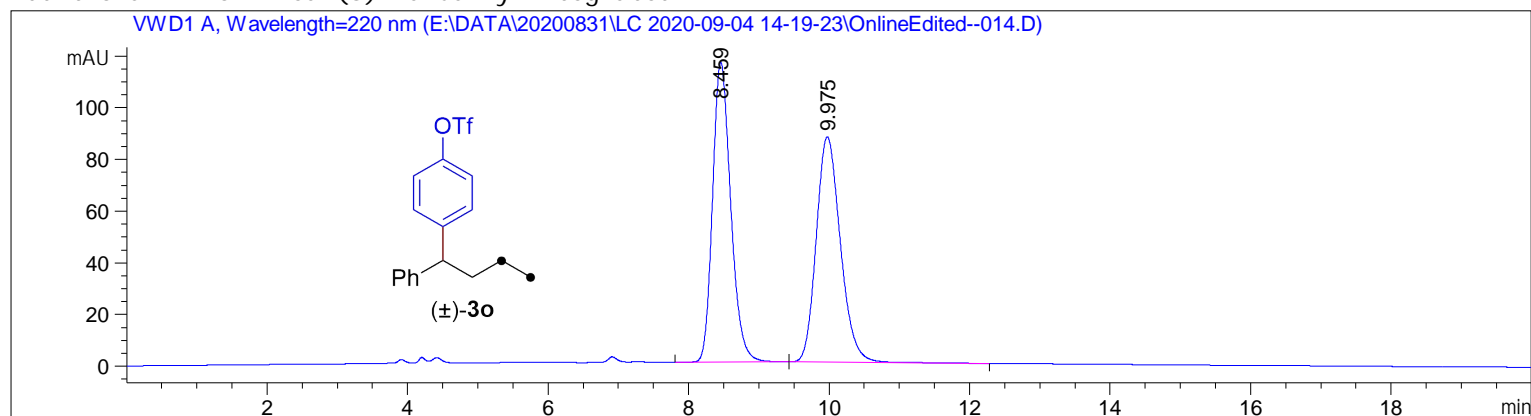

```

=====
                          Area Percent Report
=====
  
```

```

Sorted By      :      Signal
Multiplier     :      1.0000
Dilution       :      1.0000
Do not use Multiplier & Dilution Factor with ISTDs
  
```

Signal 1: VWD1 A, Wavelength=220 nm

| Peak # | RetTime [min] | Type | Width [min] | Area [mAU*s] | Height [mAU] | Area %  |
|--------|---------------|------|-------------|--------------|--------------|---------|
| 1      | 8.459         | BB   | 0.2765      | 2082.61841   | 115.99145    | 49.9658 |
| 2      | 9.975         | BB   | 0.3689      | 2085.46729   | 87.23469     | 50.0342 |

```
Totals :                      4168.08569  203.22614
```

```

=====
*** End of Report ***
  
```

Sample Name: YH-17-125-EE

```

=====
Acq. Operator   : SYSTEM                      Seq. Line :   15
Acq. Instrument : HPLC1260                   Location  :   P1-A2
Injection Date  : 9/4/2020 7:07:23 PM        Inj       :    1
                                           Inj Volume: 3.000 µl
Different Inj Volume from Sample Entry! Actual Inj Volume : 1.000 µl
Acq. Method     : E:\DATA\20200831\LC 2020-09-04 14-19-23\11PA_20_8_3.M
Last changed    : 9/4/2020 6:17:46 PM by SYSTEM
Analysis Method : E:\DATA\20200831\LC 2020-09-04 14-19-23\11PA_20_8_3.M (Sequence Method)
Last changed    : 9/4/2020 7:31:13 PM by SYSTEM
                 (modified after loading)
Additional Info  : Peak(s) manually integrated
  
```

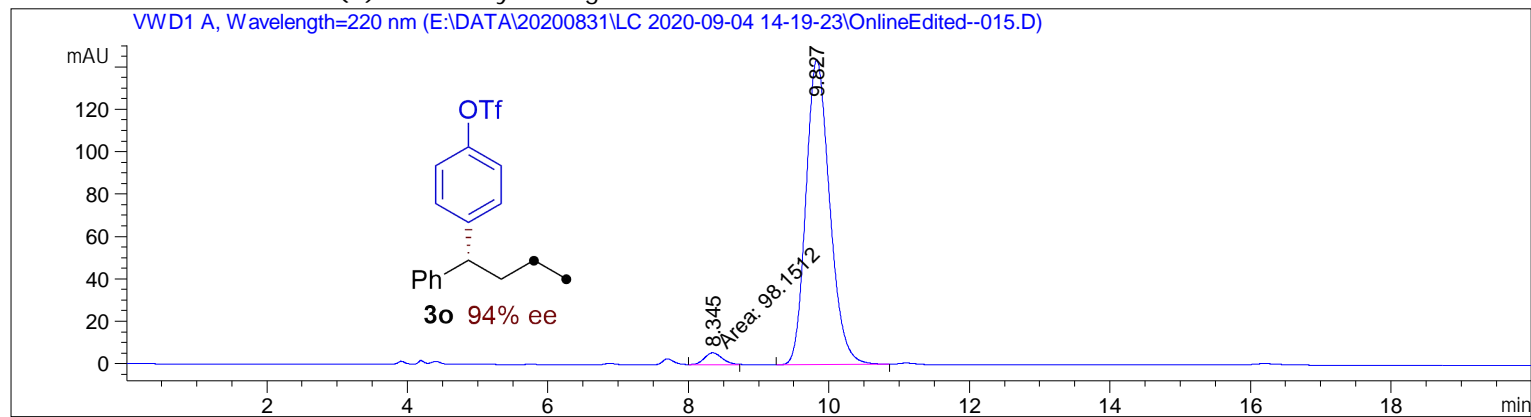

```

=====
                          Area Percent Report
=====
  
```

```

Sorted By      :      Signal
Multiplier     :      1.0000
Dilution       :      1.0000
Do not use Multiplier & Dilution Factor with ISTDs
  
```

Signal 1: VWD1 A, Wavelength=220 nm

| Peak # | RetTime [min] | Type | Width [min] | Area [mAU*s] | Height [mAU] | Area %  |
|--------|---------------|------|-------------|--------------|--------------|---------|
| 1      | 8.345         | MF   | 0.2935      | 98.15123     | 5.57303      | 2.8188  |
| 2      | 9.827         | BB   | 0.3639      | 3383.88989   | 143.63464    | 97.1812 |

```
Totals :                      3482.04112  149.20767
```

```

=====
*** End of Report ***
  
```

Sample Name: YH-17-103-EE

```

=====
Acq. Operator   : SYSTEM                      Seq. Line :    7
Acq. Instrument : HPLC1260                   Location  : P1-A3
Injection Date  : 8/26/2020 7:22:51 PM      Inj       :    1
                                           Inj Volume: 3.000 µl
Different Inj Volume from Sample Entry! Actual Inj Volume : 1.000 µl
Acq. Method     : E:\DATA\20200823\LC 2020-08-26 16-46-12\10EtOH_25_8_1.M
Last changed    : 8/26/2020 7:41:02 PM by SYSTEM
                 (modified after loading)
Analysis Method : E:\DATA\20200823\LC 2020-08-26 16-46-12\10EtOH_25_8_1.M (Sequence Method)
Last changed    : 8/26/2020 8:10:22 PM by SYSTEM
                 (modified after loading)
Additional Info : Peak(s) manually integrated
=====

```

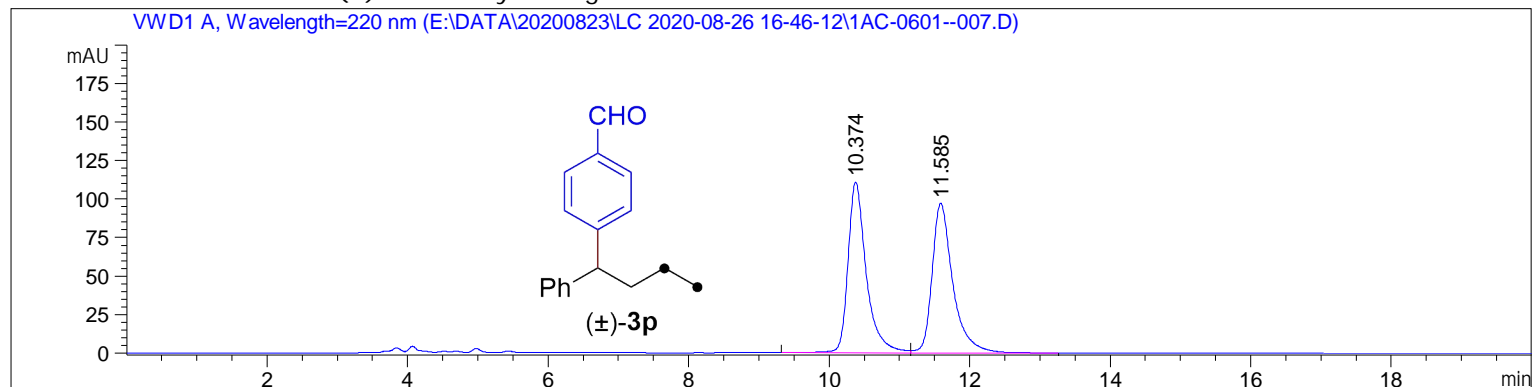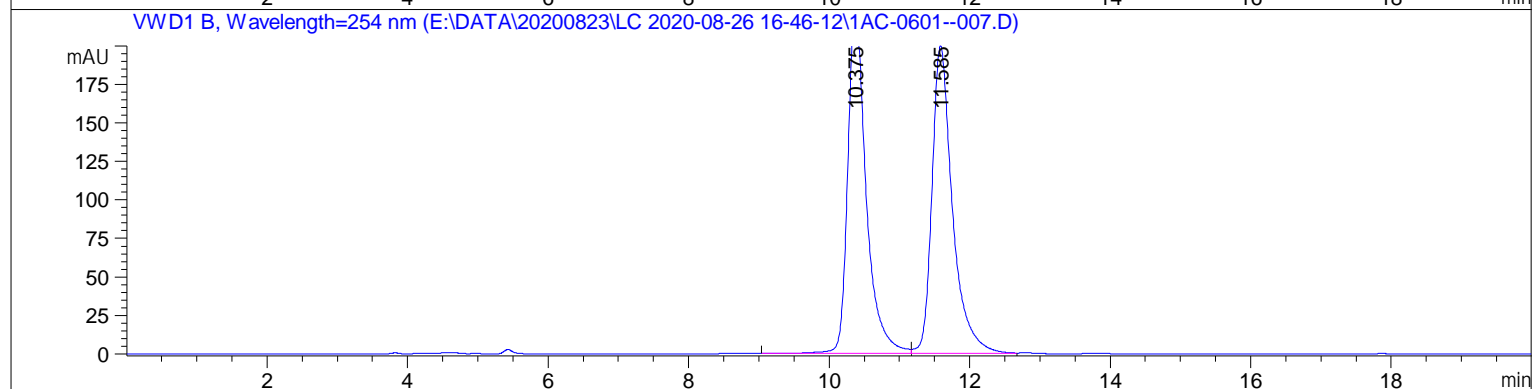

```

=====
                          Area Percent Report
=====

```

```

Sorted By      :      Signal
Multiplier     :      1.0000
Dilution      :      1.0000
Do not use Multiplier & Dilution Factor with ISTDs

```

Signal 1: VWD1 A, Wavelength=220 nm

| Peak # | RetTime [min] | Type | Width [min] | Area [mAU*s] | Height [mAU] | Area %  |
|--------|---------------|------|-------------|--------------|--------------|---------|
| 1      | 10.374        | BV   | 0.2695      | 2007.94751   | 110.75328    | 50.1692 |
| 2      | 11.585        | VB   | 0.3057      | 1994.40405   | 97.07459     | 49.8308 |

```
Totals :                      4002.35156  207.82787
```

Signal 2: VWD1 B, Wavelength=254 nm

| Peak # | RetTime [min] | Type | Width [min] | Area [mAU*s] | Height [mAU] | Area %  |
|--------|---------------|------|-------------|--------------|--------------|---------|
| 1      | 10.375        | BV   | 0.2672      | 4089.62842   | 228.06958    | 50.3680 |
| 2      | 11.585        | VB   | 0.3019      | 4029.86670   | 199.26624    | 49.6320 |

Totals :                           8119.49512  427.33582

=====  
\*\*\* End of Report \*\*\*

Sample Name: YH-17-103-EE-EE

```

=====
Acq. Operator   : SYSTEM                      Seq. Line :    8
Acq. Instrument : HPLC1260                   Location  : P1-A4
Injection Date  : 8/26/2020 7:43:38 PM      Inj       :    1
                                           Inj Volume: 3.000 µl

Different Inj Volume from Sample Entry! Actual Inj Volume : 1.000 µl
Acq. Method     : E:\DATA\20200823\LC 2020-08-26 16-46-12\10EtOH_25_8_1.M
Last changed    : 8/26/2020 7:41:02 PM by SYSTEM
Analysis Method : E:\DATA\20200823\LC 2020-08-26 16-46-12\10EtOH_25_8_1.M (Sequence Method)
Last changed    : 8/26/2020 8:10:22 PM by SYSTEM
                  (modified after loading)

```

Additional Info : Peak(s) manually integrated

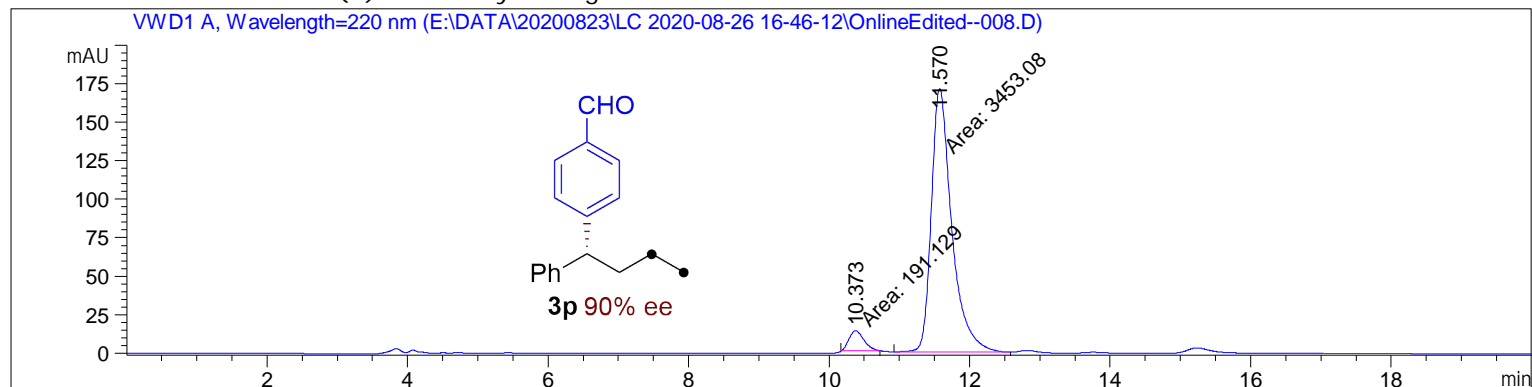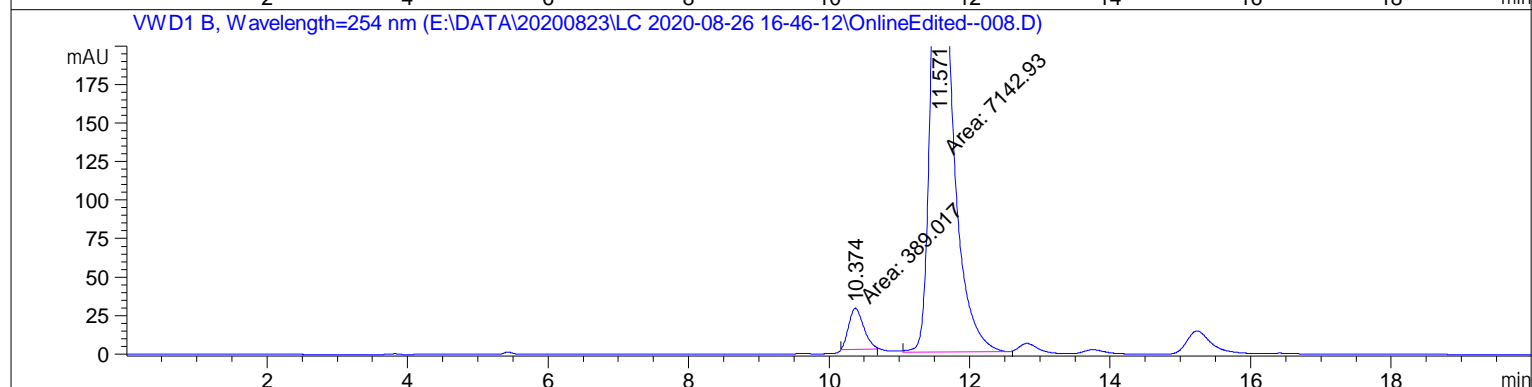

```

=====
                          Area Percent Report
=====

```

```

Sorted By      :      Signal
Multiplier     :      1.0000
Dilution       :      1.0000
Do not use Multiplier & Dilution Factor with ISTDs

```

Signal 1: VWD1 A, Wavelength=220 nm

| Peak # | RetTime [min] | Type | Width [min] | Area [mAU*s] | Height [mAU] | Area %  |
|--------|---------------|------|-------------|--------------|--------------|---------|
| 1      | 10.373        | MM   | 0.2455      | 191.12875    | 12.97701     | 5.2447  |
| 2      | 11.570        | MM   | 0.3368      | 3453.07617   | 170.87949    | 94.7553 |

Totals : 3644.20493 183.85650

Signal 2: VWD1 B, Wavelength=254 nm

| Peak # | RetTime [min] | Type | Width [min] | Area [mAU*s] | Height [mAU] | Area %  |
|--------|---------------|------|-------------|--------------|--------------|---------|
| 1      | 10.374        | MM   | 0.2447      | 389.01724    | 26.49381     | 5.1649  |
| 2      | 11.571        | MM   | 0.3337      | 7142.92676   | 356.73471    | 94.8351 |

Totals :                               7531.94400   383.22852

=====  
\*\*\* End of Report \*\*\*

Sample Name: YH-17-123-RAC

```

=====
Acq. Operator   : SYSTEM                               Seq. Line :    3
Acq. Instrument : HPLC1260                             Location  : P1-A3
Injection Date  : 9/1/2020 9:51:22 PM                 Inj       :    1
                                                    Inj Volume: 3.000 µl
Different Inj Volume from Sample Entry! Actual Inj Volume : 1.000 µl
Acq. Method     : E:\DATA\20200831\LC 2020-09-01 21-08-08\10EtOH_25_8_1.M
Last changed    : 9/1/2020 9:22:16 PM by SYSTEM
Analysis Method : E:\DATA\20200831\LC 2020-09-01 21-08-08\10EtOH_25_8_1.M (Sequence Method)
Last changed    : 9/1/2020 10:37:13 PM by SYSTEM
                  (modified after loading)
Additional Info : Peak(s) manually integrated
    
```

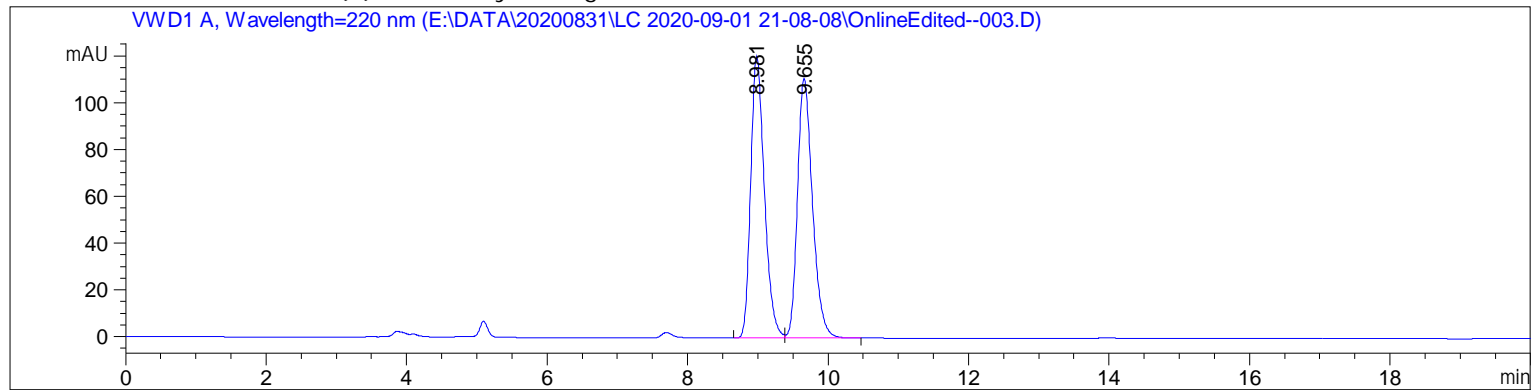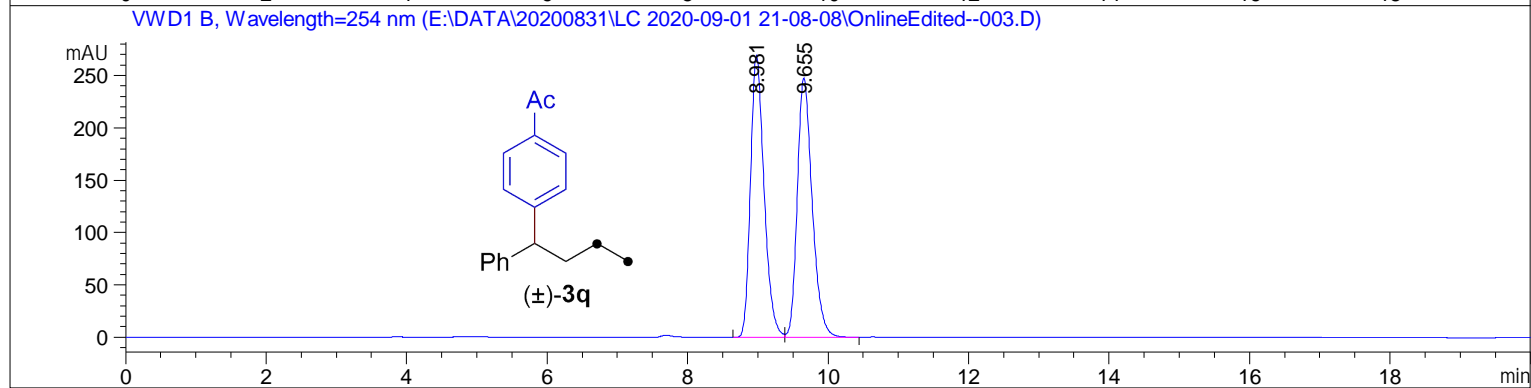

Area Percent Report

```

=====
Sorted By      :      Signal
Multiplier     :      1.0000
Dilution       :      1.0000
Do not use Multiplier & Dilution Factor with ISTDs
    
```

Signal 1: VWD1 A, Wavelength=220 nm

| Peak # | RetTime [min] | Type | Width [min] | Area [mAU*s] | Height [mAU] | Area %  |
|--------|---------------|------|-------------|--------------|--------------|---------|
| 1      | 8.981         | BV   | 0.2086      | 1632.90027   | 120.14957    | 49.8140 |
| 2      | 9.655         | VB   | 0.2270      | 1645.09265   | 110.95697    | 50.1860 |

Totals : 3277.99292 231.10654

Signal 2: VWD1 B, Wavelength=254 nm

| Peak # | RetTime [min] | Type | Width [min] | Area [mAU*s] | Height [mAU] | Area %  |
|--------|---------------|------|-------------|--------------|--------------|---------|
| 1      | 8.981         | BV   | 0.2077      | 3637.07153   | 269.06482    | 49.8745 |
| 2      | 9.655         | VB   | 0.2260      | 3655.37085   | 247.92865    | 50.1255 |

Totals :                               7292.44238 516.99347

=====  
\*\*\* End of Report \*\*\*



Sample Name: YH-17-123-EE

```

=====
Acq. Operator   : SYSTEM                      Seq. Line :    4
Acq. Instrument : HPLC1260                   Location  : P1-A4
Injection Date  : 9/1/2020 10:17:09 PM       Inj       :    1
                                           Inj Volume: 3.000 µl
Different Inj Volume from Sample Entry! Actual Inj Volume : 0.800 µl
Acq. Method     : E:\DATA\20200831\LC 2020-09-01 21-08-08\10EtOH_25_8_1.M
Last changed    : 9/1/2020 10:36:44 PM by SYSTEM
                 (modified after loading)
Analysis Method : E:\DATA\20200831\LC 2020-09-01 21-08-08\10EtOH_25_8_1.M (Sequence Method)
Last changed    : 9/1/2020 10:40:37 PM by SYSTEM
                 (modified after loading)
Additional Info : Peak(s) manually integrated
=====

```

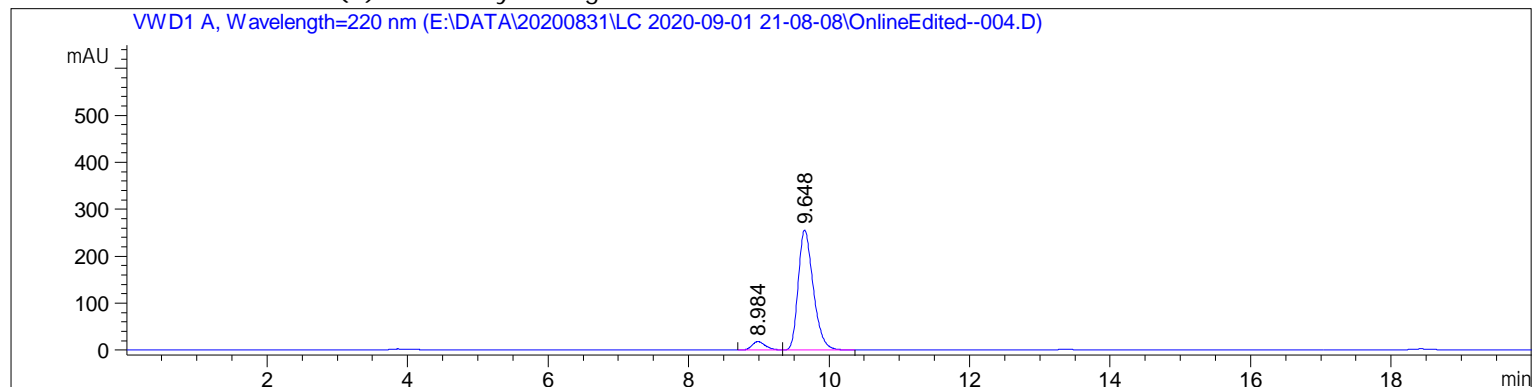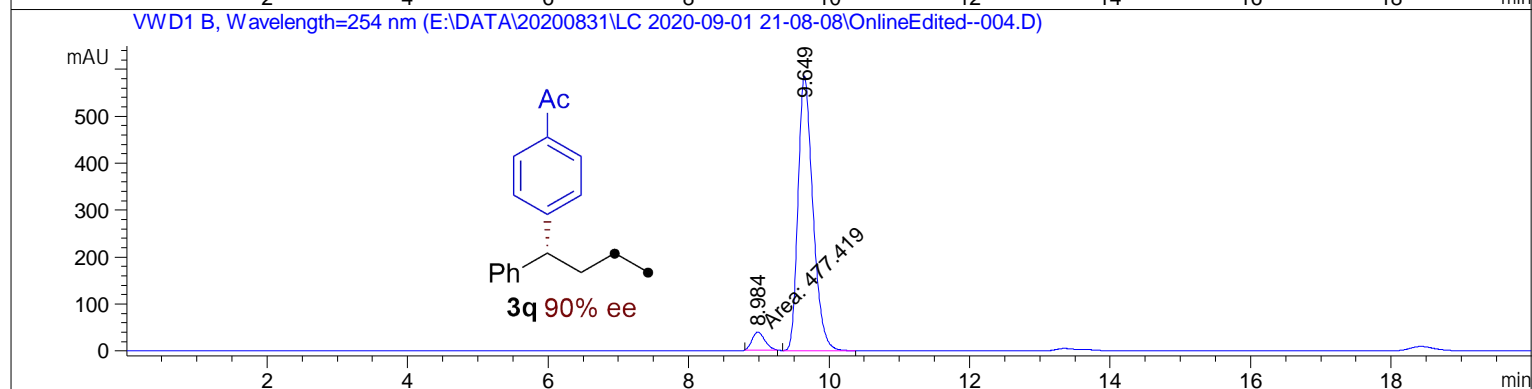

```

=====
                          Area Percent Report
=====

```

```

Sorted By      :      Signal
Multiplier     :      1.0000
Dilution       :      1.0000
Do not use Multiplier & Dilution Factor with ISTDs

```

Signal 1: VWD1 A, Wavelength=220 nm

| Peak # | RetTime [min] | Type | Width [min] | Area [mAU*s] | Height [mAU] | Area %  |
|--------|---------------|------|-------------|--------------|--------------|---------|
| 1      | 8.984         | BV   | 0.2057      | 243.22253    | 18.21900     | 6.0116  |
| 2      | 9.648         | VB   | 0.2278      | 3802.66626   | 255.24548    | 93.9884 |

```
Totals :                      4045.88879  273.46448
```

Signal 2: VWD1 B, Wavelength=254 nm

| Peak # | RetTime [min] | Type | Width [min] | Area [mAU*s] | Height [mAU] | Area %  |
|--------|---------------|------|-------------|--------------|--------------|---------|
| 1      | 8.984         | MM   | 0.2075      | 477.41904    | 38.34625     | 5.2539  |
| 2      | 9.649         | VB   | 0.2259      | 8609.58887   | 584.47095    | 94.7461 |

Totals :                           9087.00790 622.81720

=====  
\*\*\* End of Report \*\*\*

Sample Name: YH-17-113-RAC

```

=====
Acq. Operator   : SYSTEM                               Seq. Line :   23
Acq. Instrument : HPLC1260                           Location  : P1-A3
Injection Date  : 8/30/2020 4:27:17 AM                Inj       :    1
                                                    Inj Volume: 3.000 µl
Different Inj Volume from Sample Entry! Actual Inj Volume : 0.200 µl
Method          : E:\DATA\20200829\LC 2020-08-29 17-33-08\1EtOH_25_5_2.M (Sequence Method)
Last changed    : 8/29/2020 9:51:08 PM by SYSTEM
Additional Info : Peak(s) manually integrated
=====

```

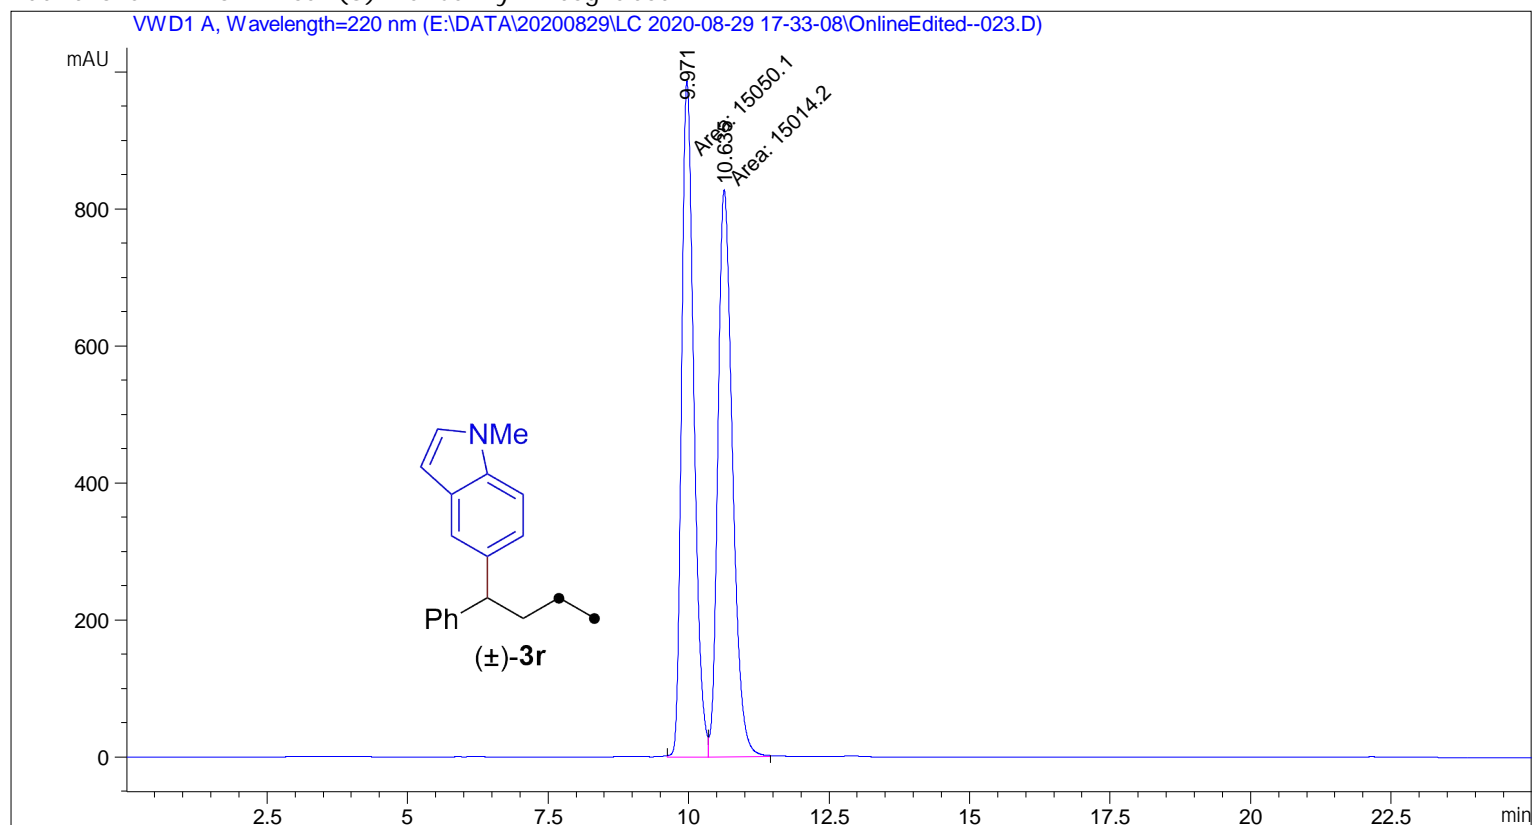

```

=====
                          Area Percent Report
=====

```

```

Sorted By      :      Signal
Multiplier     :      1.0000
Dilution       :      1.0000
Use Multiplier & Dilution Factor with ISTDs

```

Signal 1: VWD1 A, Wavelength=220 nm

| Peak # | RetTime [min] | Type | Width [min] | Area [mAU*s] | Height [mAU] | Area %  |
|--------|---------------|------|-------------|--------------|--------------|---------|
| 1      | 9.971         | FM   | 0.2544      | 1.50501e4    | 986.08356    | 50.0596 |
| 2      | 10.635        | MF   | 0.3023      | 1.50142e4    | 827.73993    | 49.9404 |

```
Totals :                      3.00643e4  1813.82349
```

```

=====
*** End of Report ***
=====

```

Sample Name: YH-17-113-EE

```

=====
Acq. Operator   : SYSTEM                      Seq. Line :   24
Acq. Instrument : HPLC1260                   Location  : P1-A4
Injection Date  : 8/30/2020 4:53:01 AM      Inj       :    1
                                           Inj Volume: 3.000 µl
Different Inj Volume from Sample Entry! Actual Inj Volume : 0.500 µl
Method          : E:\DATA\20200829\LC 2020-08-29 17-33-08\1EtOH_25_5_2.M (Sequence Method)
Last changed    : 8/29/2020 9:51:08 PM by SYSTEM
Additional Info : Peak(s) manually integrated
=====

```

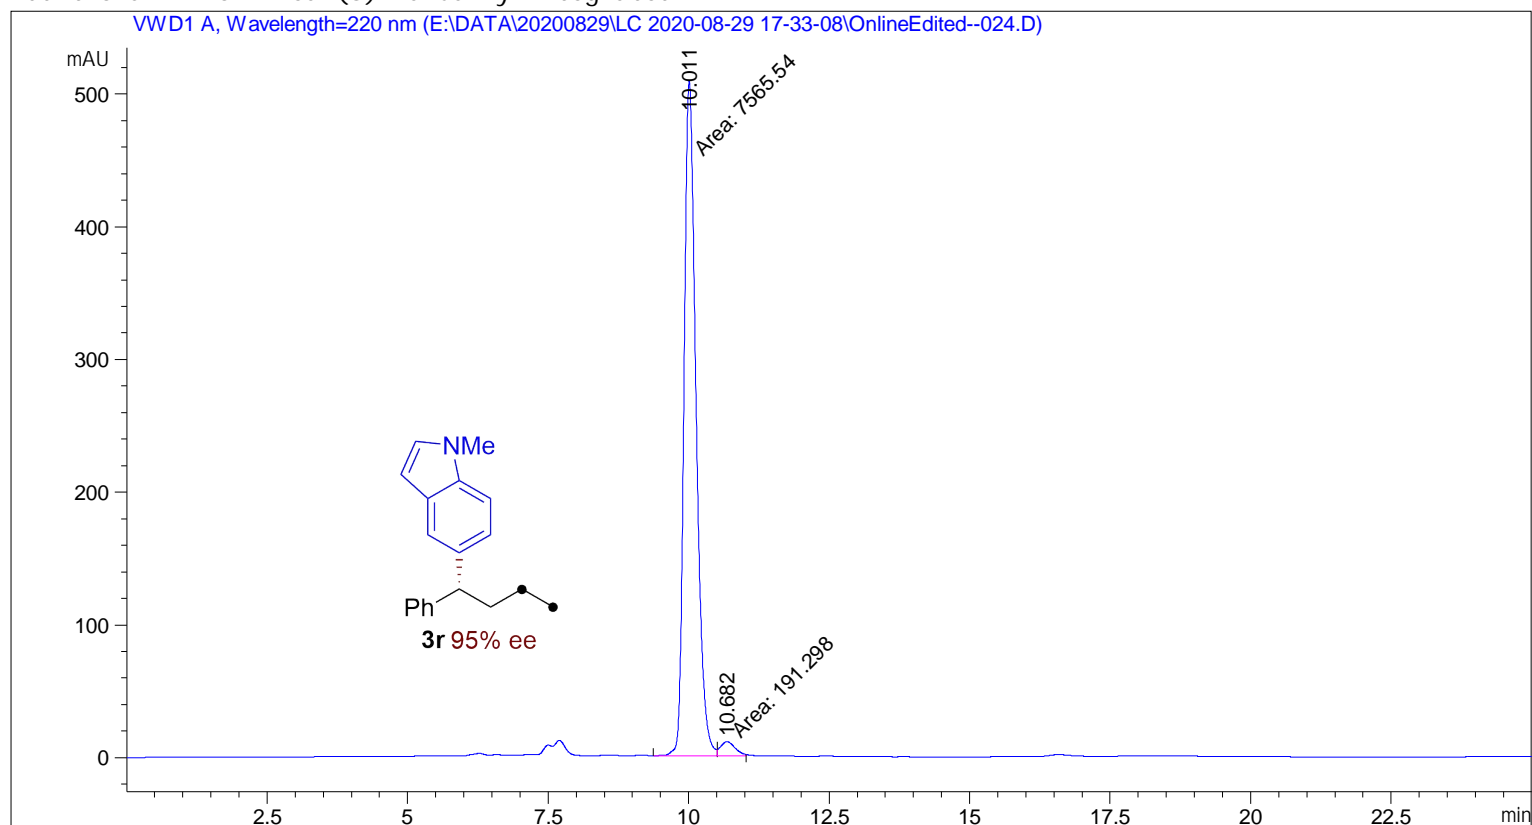

```

=====
                          Area Percent Report
=====

```

```

Sorted By      : Signal
Multiplier     : 1.0000
Dilution       : 1.0000
Use Multiplier & Dilution Factor with ISTDs

```

Signal 1: VWD1 A, Wavelength=220 nm

| Peak # | RetTime [min] | Type | Width [min] | Area [mAU*s] | Height [mAU] | Area %  |
|--------|---------------|------|-------------|--------------|--------------|---------|
| 1      | 10.011        | MF   | 0.2481      | 7565.53662   | 508.18222    | 97.5338 |
| 2      | 10.682        | MF   | 0.2979      | 191.29788    | 10.70320     | 2.4662  |

```
Totals :                      7756.83450  518.88542
```

```

=====
*** End of Report ***
=====

```

Sample Name: YH-17-104-RAC

```

=====
Acq. Operator   : SYSTEM                               Seq. Line :   12
Acq. Instrument : HPLC1260                             Location  :   P1-A5
Injection Date  : 8/26/2020 9:09:08 PM                 Inj       :    1
                                                    Inj Volume: 3.000 µl
Different Inj Volume from Sample Entry! Actual Inj Volume : 1.000 µl
Acq. Method     : E:\DATA\20200823\LC 2020-08-26 16-46-12\51PA_20_8_2.M
Last changed    : 8/26/2020 8:31:07 PM by SYSTEM
Analysis Method : E:\DATA\20200823\LC 2020-08-26 16-46-12\51PA_20_8_2.M (Sequence Method)
Last changed    : 8/26/2020 9:46:16 PM by SYSTEM
                  (modified after loading)
Additional Info : Peak(s) manually integrated
    
```

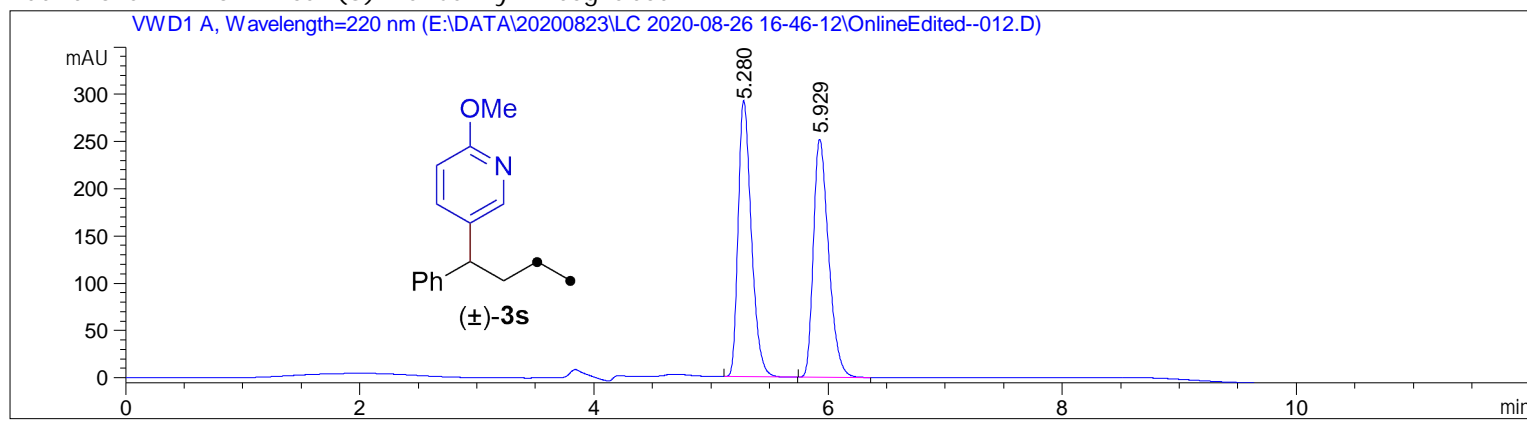

=====  
 Area Percent Report  
 =====

Sorted By : Signal  
 Multiplier : 1.0000  
 Dilution : 1.0000  
 Do not use Multiplier & Dilution Factor with ISTDs

Signal 1: VWD1 A, Wavelength=220 nm

| Peak # | RetTime [min] | Type | Width [min] | Area [mAU*s] | Height [mAU] | Area %  |
|--------|---------------|------|-------------|--------------|--------------|---------|
| 1      | 5.280         | BB   | 0.1202      | 2286.58057   | 292.43408    | 50.1367 |
| 2      | 5.929         | BB   | 0.1383      | 2274.11108   | 252.02625    | 49.8633 |

Totals : 4560.69165 544.46033

=====  
 \*\*\* End of Report \*\*\*

Sample Name: YH-17-104-EE

```

=====
Acq. Operator   : SYSTEM                               Seq. Line :   13
Acq. Instrument : HPLC1260                             Location  :   P1-A6
Injection Date  : 8/26/2020 9:29:52 PM                Inj       :    1
                                                    Inj Volume: 3.000 µl
Different Inj Volume from Sample Entry! Actual Inj Volume : 1.000 µl
Acq. Method     : E:\DATA\20200823\LC 2020-08-26 16-46-12\51PA_20_8_2.M
Last changed    : 8/26/2020 9:44:35 PM by SYSTEM
                  (modified after loading)
Analysis Method : E:\DATA\20200823\LC 2020-08-26 16-46-12\51PA_20_8_2.M (Sequence Method)
Last changed    : 8/26/2020 9:46:42 PM by SYSTEM
                  (modified after loading)
Additional Info : Peak(s) manually integrated
=====

```

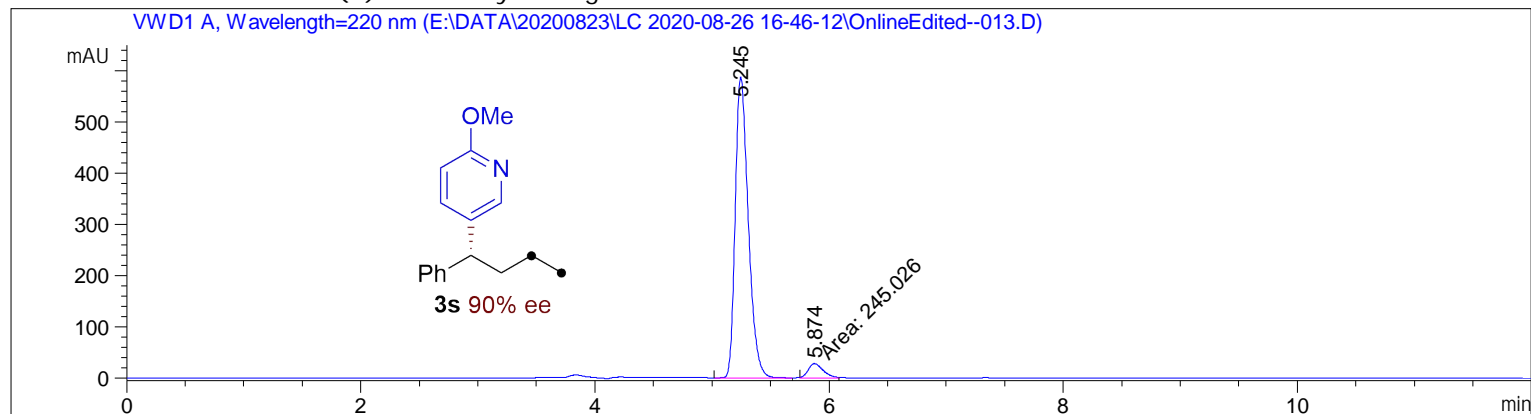

```

=====
                          Area Percent Report
=====

```

```

Sorted By      :      Signal
Multiplier     :      1.0000
Dilution       :      1.0000
Do not use Multiplier & Dilution Factor with ISTDs

```

Signal 1: VWD1 A, Wavelength=220 nm

| Peak # | RetTime [min] | Type | Width [min] | Area [mAU*s] | Height [mAU] | Area %  |
|--------|---------------|------|-------------|--------------|--------------|---------|
| 1      | 5.245         | BV   | 0.1190      | 4532.34863   | 587.33282    | 94.8711 |
| 2      | 5.874         | FM   | 0.1473      | 245.02647    | 27.72322     | 5.1289  |

```
Totals :                4777.37511  615.05604
```

```

=====
*** End of Report ***
=====

```

Sample Name: YH-17-120-RAC

```

=====
Acq. Operator   : SYSTEM                               Seq. Line :   12
Acq. Instrument : HPLC1260                             Location  :   P1-A4
Injection Date  : 9/2/2020 5:02:46 PM                  Inj       :    1
                                                    Inj Volume: 3.000 µl
Different Inj Volume from Sample Entry! Actual Inj Volume : 8.000 µl
Acq. Method     : E:\DATA\20200831\LC 2020-09-02 09-50-30\21PA_45_10_2.M
Last changed    : 9/2/2020 5:16:28 PM by SYSTEM
                  (modified after loading)
Analysis Method : E:\DATA\20200831\LC 2020-09-02 09-50-30\21PA_45_10_2.M (Sequence Method)
Last changed    : 9/2/2020 5:51:52 PM by SYSTEM
                  (modified after loading)
Additional Info : Peak(s) manually integrated
=====

```

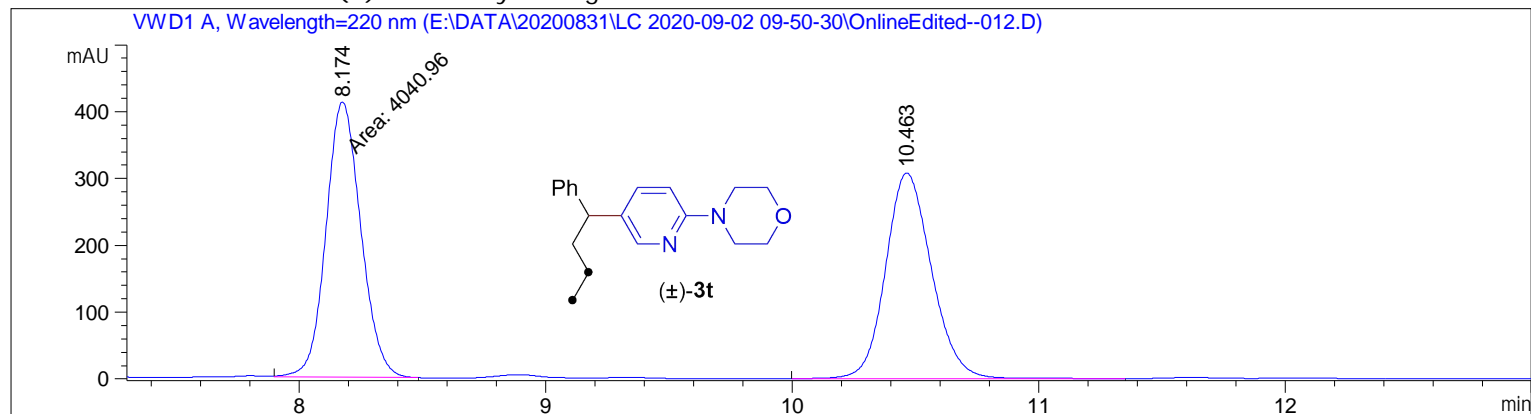

```

=====
                          Area Percent Report
=====

```

```

Sorted By      :      Signal
Multiplier     :      1.0000
Dilution       :      1.0000
Do not use Multiplier & Dilution Factor with ISTDs

```

Signal 1: VWD1 A, Wavelength=220 nm

| Peak # | RetTime [min] | Type | Width [min] | Area [mAU*s] | Height [mAU] | Area %  |
|--------|---------------|------|-------------|--------------|--------------|---------|
| 1      | 8.174         | MM   | 0.1635      | 4040.95679   | 411.87637    | 50.4548 |
| 2      | 10.463        | BB   | 0.1996      | 3968.10010   | 307.35077    | 49.5452 |

```
Totals :                      8009.05688  719.22714
```

```

=====
*** End of Report ***
=====

```

Sample Name: YH-17-120-EE

```

=====
Acq. Operator   : SYSTEM                               Seq. Line :   13
Acq. Instrument : HPLC1260                             Location  :   P1-A5
Injection Date  : 9/2/2020 5:23:33 PM                 Inj       :    1
                                                    Inj Volume: 3.000 µl
Different Inj Volume from Sample Entry! Actual Inj Volume : 1.000 µl
Acq. Method     : E:\DATA\20200831\LC 2020-09-02 09-50-30\21PA_45_10_2.M
Last changed    : 9/2/2020 5:16:28 PM by SYSTEM
Analysis Method : E:\DATA\20200831\LC 2020-09-02 09-50-30\21PA_45_10_2.M (Sequence Method)
Last changed    : 9/2/2020 5:53:00 PM by SYSTEM
                  (modified after loading)
Additional Info : Peak(s) manually integrated
  
```

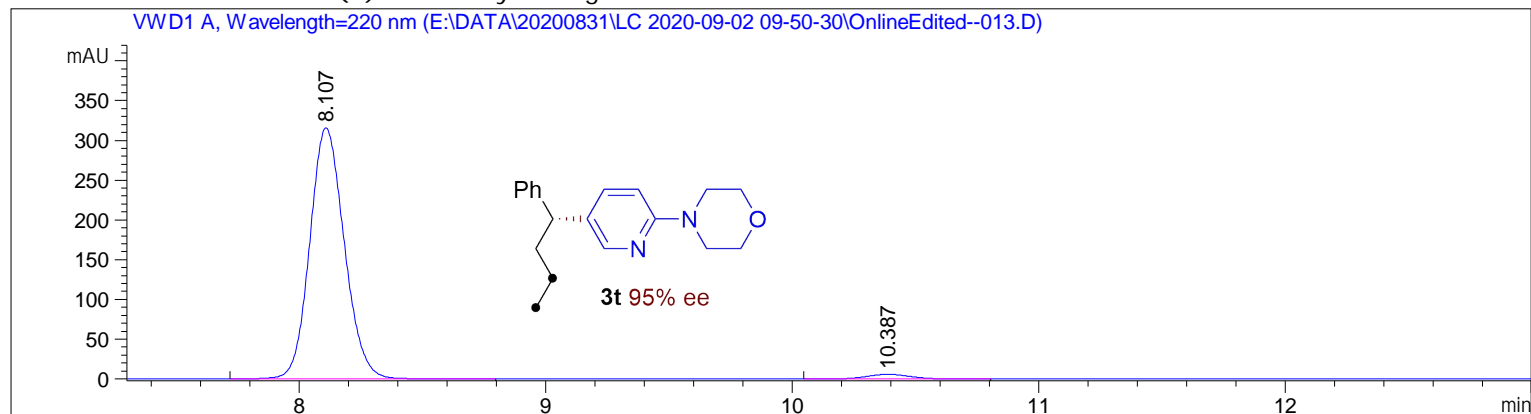

```

=====
                          Area Percent Report
=====
  
```

```

Sorted By      :      Signal
Multiplier     :      1.0000
Dilution      :      1.0000
Do not use Multiplier & Dilution Factor with ISTDs
  
```

Signal 1: VWD1 A, Wavelength=220 nm

| Peak # | RetTime [min] | Type | Width [min] | Area [mAU*s] | Height [mAU] | Area %  |
|--------|---------------|------|-------------|--------------|--------------|---------|
| 1      | 8.107         | BB   | 0.1505      | 3073.72876   | 315.87805    | 97.6446 |
| 2      | 10.387        | BB   | 0.1928      | 74.14445     | 5.97577      | 2.3554  |

```
Totals :                      3147.87321  321.85382
```

```

=====
*** End of Report ***
  
```



Sample Name: YH-17-157-RAC

```

=====
Acq. Operator   : SYSTEM                               Seq. Line :    2
Acq. Instrument : HPLC1260                             Location  :   P1-A3
Injection Date  : 9/10/2020 9:16:15 PM                Inj       :    1
                                                    Inj Volume: 3.000 µl
Different Inj Volume from Sample Entry! Actual Inj Volume : 0.200 µl
Acq. Method     : E:\DATA\20200905\LC 2020-09-10 20-53-53\51PA_20_8_3.M
Last changed    : 9/10/2020 9:28:14 PM by SYSTEM
                  (modified after loading)
Analysis Method : E:\DATA\20200905\LC 2020-09-10 20-53-53\51PA_20_8_3.M (Sequence Method)
Last changed    : 9/10/2020 9:48:28 PM by SYSTEM
                  (modified after loading)
Additional Info : Peak(s) manually integrated
=====

```

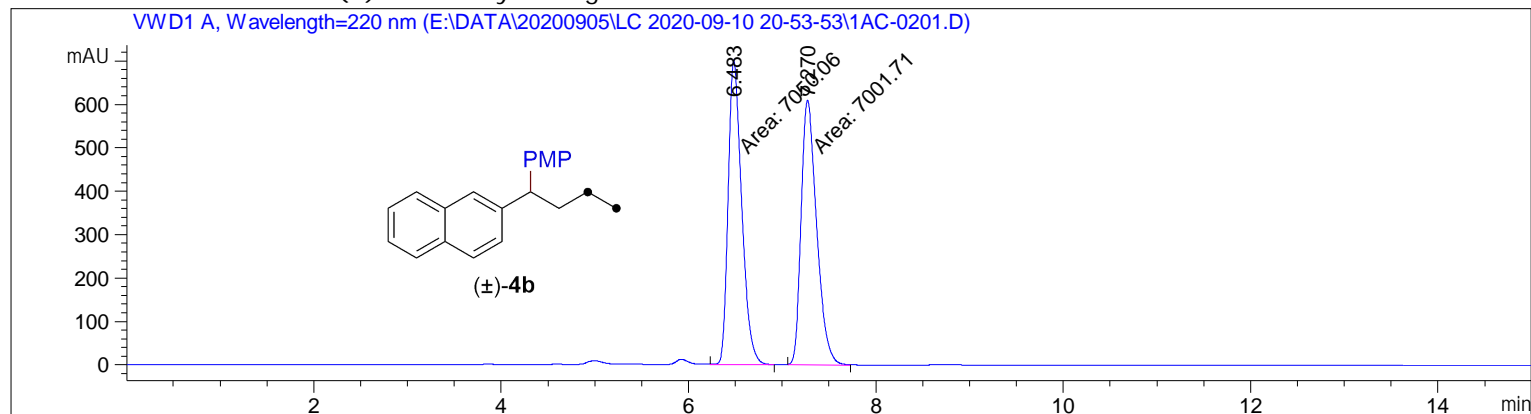

```

=====
                          Area Percent Report
=====

```

```

Sorted By      :      Signal
Multiplier     :      1.0000
Dilution       :      1.0000
Do not use Multiplier & Dilution Factor with ISTDs

```

Signal 1: VWD1 A, Wavelength=220 nm

| Peak # | RetTime [min] | Type | Width [min] | Area [mAU*s] | Height [mAU] | Area %  |
|--------|---------------|------|-------------|--------------|--------------|---------|
| 1      | 6.483         | FM   | 0.1674      | 7050.06348   | 701.99628    | 50.1720 |
| 2      | 7.270         | MM   | 0.1916      | 7001.71338   | 609.16565    | 49.8280 |

```
Totals :                      1.40518e4  1311.16193
```

```

=====
*** End of Report ***
=====

```

Sample Name: YH-17-157-EE

```

=====
Acq. Operator   : SYSTEM                               Seq. Line :    3
Acq. Instrument : HPLC1260                             Location  : P1-A4
Injection Date  : 9/10/2020 9:31:58 PM                 Inj       :    1
                                                    Inj Volume: 3.000 µl
Different Inj Volume from Sample Entry! Actual Inj Volume : 0.100 µl
Acq. Method     : E:\DATA\20200905\LC 2020-09-10 20-53-53\51PA_20_8_3.M
Last changed    : 9/10/2020 9:28:14 PM by SYSTEM
Analysis Method : E:\DATA\20200905\LC 2020-09-10 20-53-53\51PA_20_8_3.M (Sequence Method)
Last changed    : 9/10/2020 9:48:28 PM by SYSTEM
                  (modified after loading)
Additional Info : Peak(s) manually integrated

```

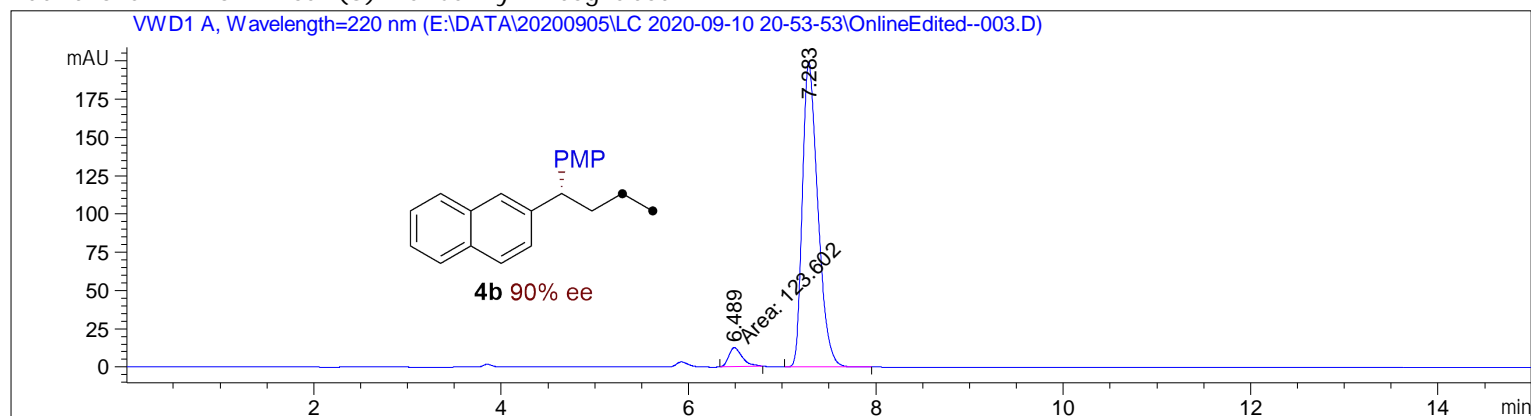

```

=====
                          Area Percent Report
=====

```

```

Sorted By      :      Signal
Multiplier     :      1.0000
Dilution      :      1.0000
Do not use Multiplier & Dilution Factor with ISTDs

```

Signal 1: VWD1 A, Wavelength=220 nm

| Peak # | RetTime [min] | Type | Width [min] | Area [mAU*s] | Height [mAU] | Area %  |
|--------|---------------|------|-------------|--------------|--------------|---------|
| 1      | 6.489         | MM   | 0.1657      | 123.60246    | 12.43593     | 5.1238  |
| 2      | 7.283         | BB   | 0.1751      | 2288.71460   | 199.18835    | 94.8762 |

```
Totals :                2412.31705  211.62428
```

```

=====
*** End of Report ***

```

Sample Name: YH-17-131-RAC

```

=====
Acq. Operator   : SYSTEM                               Seq. Line :   66
Acq. Instrument : HPLC1260                             Location  : P1-A5
Injection Date  : 9/8/2020 2:17:15 AM                 Inj       :    1
                                                    Inj Volume: 3.000 µl
Different Inj Volume from Sample Entry! Actual Inj Volume : 1.000 µl
Acq. Method    : E:\DATA\20200905\LC 2020-09-06 15-18-12\1ETOH_80_5_3.M
Last changed   : 9/7/2020 10:38:58 PM by SYSTEM
Analysis Method: E:\DATA\20200905\LC 2020-09-06 15-18-12\1ETOH_80_5_3.M (Sequence Method)
Last changed   : 9/8/2020 11:29:32 AM by SYSTEM
                (modified after loading)
Additional Info : Peak(s) manually integrated
  
```

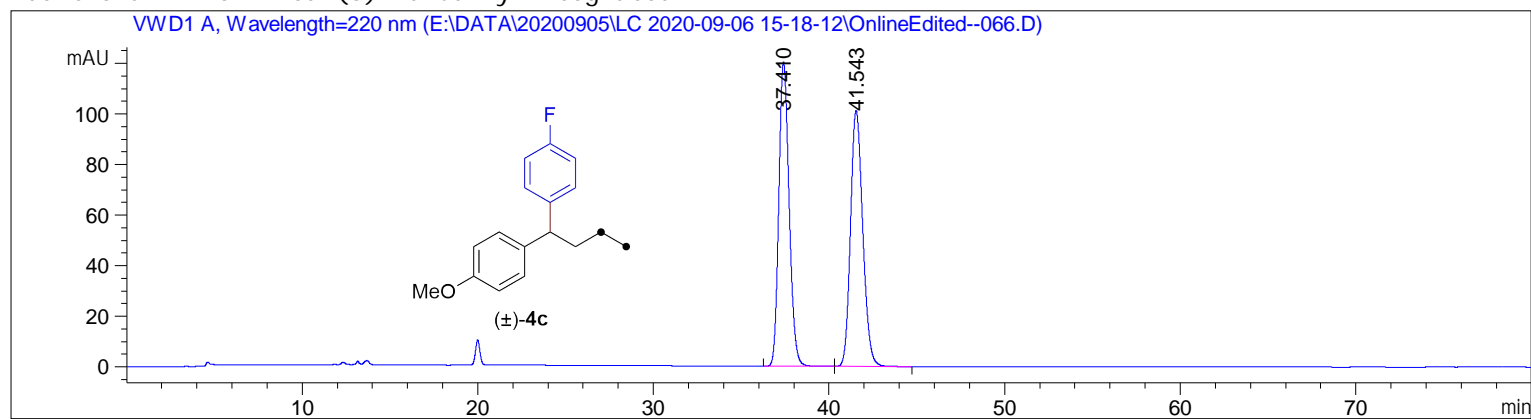

```

=====
                          Area Percent Report
=====
  
```

```

Sorted By      :      Signal
Multiplier     :      1.0000
Dilution      :      1.0000
Do not use Multiplier & Dilution Factor with ISTDs
  
```

Signal 1: VWD1 A, Wavelength=220 nm

| Peak # | RetTime [min] | Type | Width [min] | Area [mAU*s] | Height [mAU] | Area %  |
|--------|---------------|------|-------------|--------------|--------------|---------|
| 1      | 37.410        | BB   | 0.6312      | 4908.74658   | 120.27238    | 50.0023 |
| 2      | 41.543        | BB   | 0.7496      | 4908.30127   | 101.24754    | 49.9977 |

```
Totals :                      9817.04785  221.51991
```

```

=====
*** End of Report ***
  
```

Sample Name: YH-17-131-EE

```

=====
Acq. Operator   : SYSTEM                      Seq. Line :   67
Acq. Instrument : HPLC1260                   Location  : P1-A6
Injection Date  : 9/8/2020 3:38:00 AM        Inj       :    1
                                           Inj Volume: 3.000 µl

Different Inj Volume from Sample Entry! Actual Inj Volume : 1.000 µl
Acq. Method     : E:\DATA\20200905\LC 2020-09-06 15-18-12\1ETOH_80_5_3.M
Last changed    : 9/7/2020 10:38:58 PM by SYSTEM
Analysis Method : E:\DATA\20200905\LC 2020-09-06 15-18-12\1ETOH_80_5_3.M (Sequence Method)
Last changed    : 9/8/2020 11:29:32 AM by SYSTEM
                  (modified after loading)

```

Additional Info : Peak(s) manually integrated

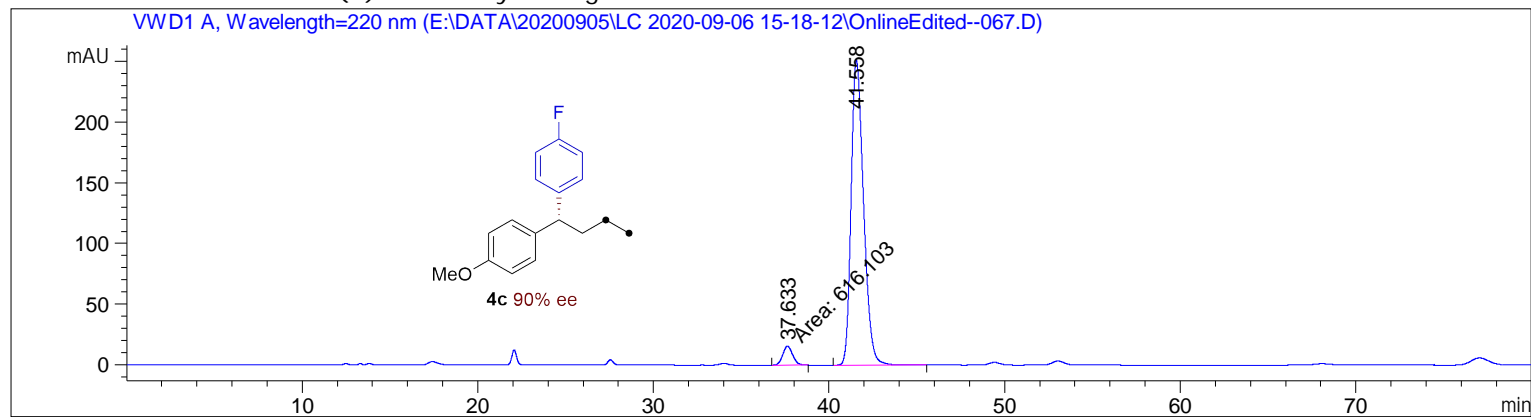

```

=====
                          Area Percent Report
=====

```

```

Sorted By      :      Signal
Multiplier     :      1.0000
Dilution       :      1.0000
Do not use Multiplier & Dilution Factor with ISTDs

```

Signal 1: VWD1 A, Wavelength=220 nm

| Peak # | RetTime [min] | Type | Width [min] | Area [mAU*s] | Height [mAU] | Area %  |
|--------|---------------|------|-------------|--------------|--------------|---------|
| 1      | 37.633        | MF   | 0.6604      | 616.10272    | 15.54854     | 4.7461  |
| 2      | 41.558        | BB   | 0.7574      | 1.23651e4    | 251.14645    | 95.2539 |

```
Totals :                      1.29812e4  266.69500
```

```

=====
*** End of Report ***

```

Sample Name: YH-17-162-RAC

```

=====
Acq. Operator   : SYSTEM                               Seq. Line :   67
Acq. Instrument : HPLC1260                             Location  : P1-A4
Injection Date  : 9/15/2020 12:15:47 AM                Inj       :    1
                                                    Inj Volume: 3.000 µl
Different Inj Volume from Sample Entry! Actual Inj Volume : 1.000 µl
Acq. Method     : E:\DATA\20200905\LC 2020-09-13 18-37-17\5EtOH_50_5_1.M
Last changed    : 9/14/2020 11:15:32 PM by SYSTEM
Analysis Method : E:\DATA\20200905\LC 2020-09-13 18-37-17\5EtOH_50_5_1.M (Sequence Method)
Last changed    : 9/15/2020 2:54:21 PM by SYSTEM
                  (modified after loading)
    
```

Additional Info : Peak(s) manually integrated

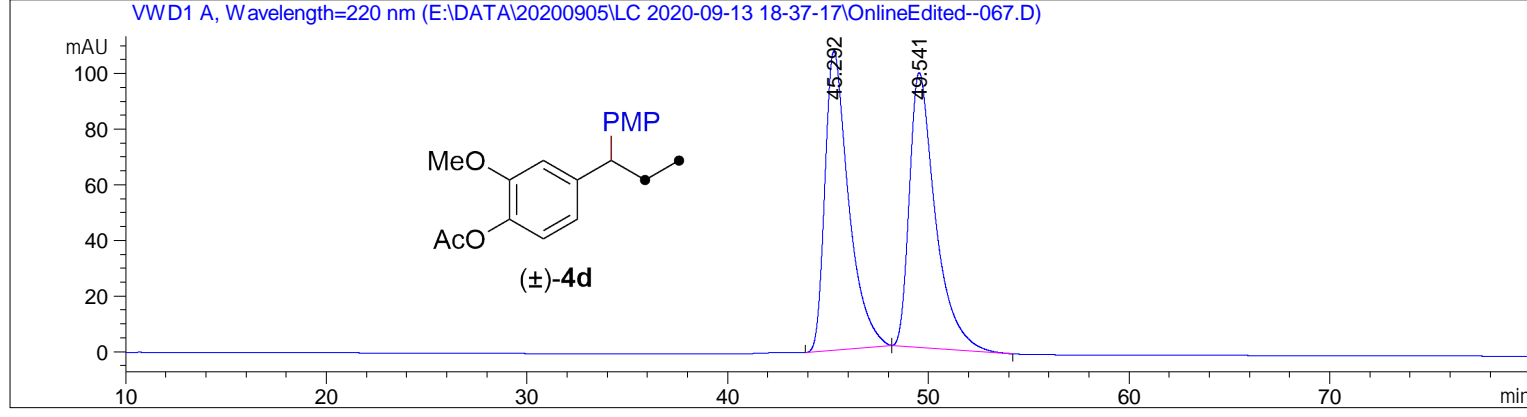

Area Percent Report

```

Sorted By      :      Signal
Multiplier     :      1.0000
Dilution       :      1.0000
Do not use Multiplier & Dilution Factor with ISTDs
    
```

Signal 1: VWD1 A, Wavelength=220 nm

| Peak # | RetTime [min] | Type | Width [min] | Area [mAU*s] | Height [mAU] | Area %  |
|--------|---------------|------|-------------|--------------|--------------|---------|
| 1      | 45.292        | BB   | 1.2246      | 8861.74219   | 107.51409    | 49.9567 |
| 2      | 49.541        | BB   | 1.3363      | 8877.11035   | 98.79295     | 50.0433 |

Totals : 1.77389e4 206.30704

\*\*\* End of Report \*\*\*

Sample Name: YH-17-162-EE

```

=====
Acq. Operator   : SYSTEM                      Seq. Line :   66
Acq. Instrument : HPLC1260                   Location  : P1-A5
Injection Date  : 9/14/2020 10:55:01 PM      Inj       :    1
                                           Inj Volume: 3.000 µl
Different Inj Volume from Sample Entry! Actual Inj Volume : 1.000 µl
Acq. Method     : E:\DATA\20200905\LC 2020-09-13 18-37-17\5EtOH_50_5_1.M
Last changed    : 9/14/2020 11:15:32 PM by SYSTEM
                 (modified after loading)
Analysis Method : E:\DATA\20200905\LC 2020-09-13 18-37-17\5EtOH_50_5_1.M (Sequence Method)
Last changed    : 9/15/2020 2:53:28 PM by SYSTEM
                 (modified after loading)
Additional Info : Peak(s) manually integrated
=====

```

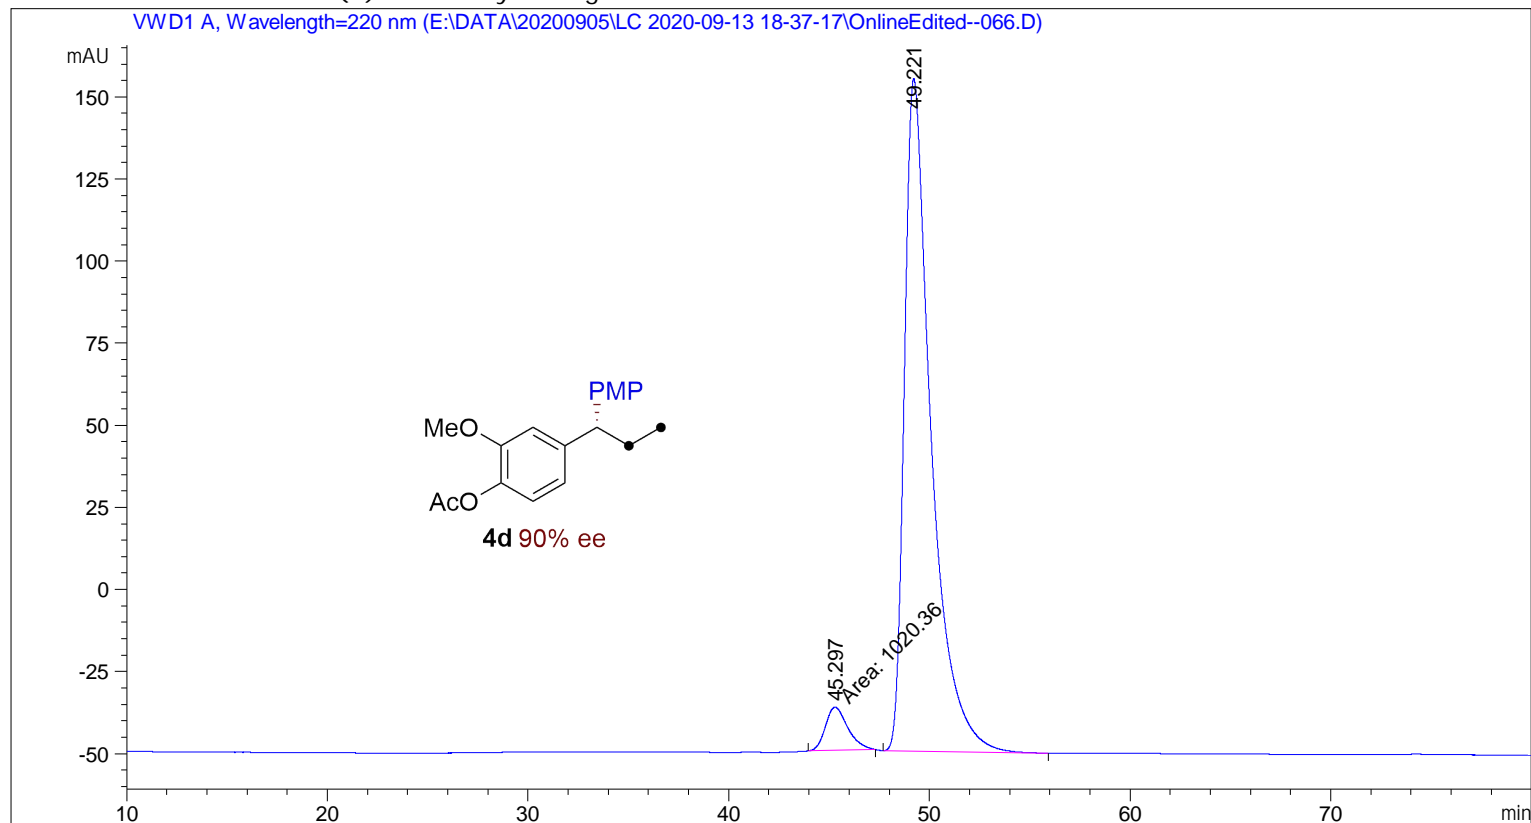

```

=====
                          Area Percent Report
=====

```

```

Sorted By      :      Signal
Multiplier     :      1.0000
Dilution       :      1.0000
Use Multiplier & Dilution Factor with ISTDs

```

Signal 1: VWD1 A, Wavelength=220 nm

| Peak # | RetTime [min] | Type | Width [min] | Area [mAU*s] | Height [mAU] | Area %  |
|--------|---------------|------|-------------|--------------|--------------|---------|
| 1      | 45.297        | MM   | 1.2879      | 1020.36469   | 13.20450     | 5.1082  |
| 2      | 49.221        | BB   | 1.3588      | 1.89546e4    | 204.78865    | 94.8918 |

```
Totals :                      1.99750e4  217.99315
```

Sample Name: YH-17-158-AD

```

=====
Acq. Operator   : SYSTEM                               Seq. Line :   60
Acq. Instrument : HPLC1260                             Location  : P1-B3
Injection Date  : 9/14/2020 7:30:26 PM                 Inj       :    1
                                                    Inj Volume: 3.000 µl
Different Inj Volume from Sample Entry! Actual Inj Volume : 1.000 µl
Acq. Method     : E:\DATA\20200905\LC 2020-09-13 18-37-17\10ETOH_25_10_3.M
Last changed    : 9/13/2020 8:50:01 PM by SYSTEM
Analysis Method : E:\DATA\20200905\LC 2020-09-13 18-37-17\10ETOH_25_10_3.M (Sequence Method)
Last changed    : 9/14/2020 8:36:44 PM by SYSTEM
                  (modified after loading)

```

Additional Info : Peak(s) manually integrated

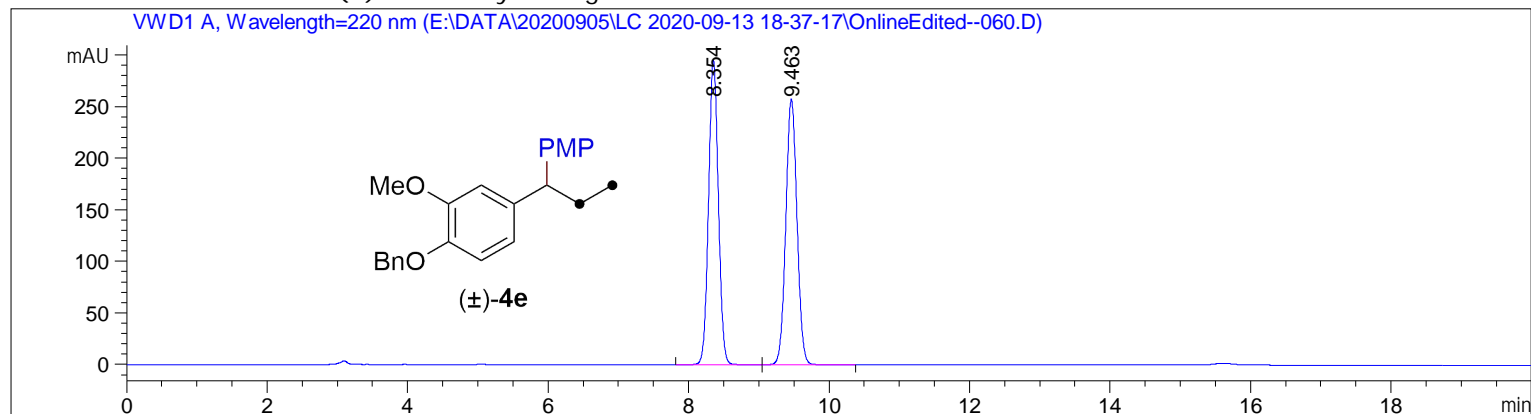

```

=====
                          Area Percent Report
=====

```

```

Sorted By      :      Signal
Multiplier     :      1.0000
Dilution       :      1.0000
Do not use Multiplier & Dilution Factor with ISTDs

```

Signal 1: VWD1 A, Wavelength=220 nm

| Peak # | RetTime [min] | Type | Width [min] | Area [mAU*s] | Height [mAU] | Area %  |
|--------|---------------|------|-------------|--------------|--------------|---------|
| 1      | 8.354         | BB   | 0.1500      | 2859.24878   | 295.21860    | 50.0154 |
| 2      | 9.463         | BB   | 0.1724      | 2857.48560   | 257.59555    | 49.9846 |

```
Totals :                      5716.73438  552.81415
```

```

=====
*** End of Report ***

```

Sample Name: YH-17-158-EE

```

=====
Acq. Operator   : SYSTEM                               Seq. Line :   63
Acq. Instrument : HPLC1260                             Location  : P1-A2
Injection Date  : 9/14/2020 8:47:44 PM                 Inj       :    1
                                                    Inj Volume: 3.000 µl
Different Inj Volume from Sample Entry! Actual Inj Volume : 1.000 µl
Acq. Method     : E:\DATA\20200905\LC 2020-09-13 18-37-17\10ETOH_25_10_3.M
Last changed    : 9/13/2020 8:50:01 PM by SYSTEM
Analysis Method : E:\DATA\20200905\LC 2020-09-13 18-37-17\10ETOH_25_10_3.M (Sequence Method)
Last changed    : 9/14/2020 9:19:46 PM by SYSTEM
                  (modified after loading)

```

Additional Info : Peak(s) manually integrated

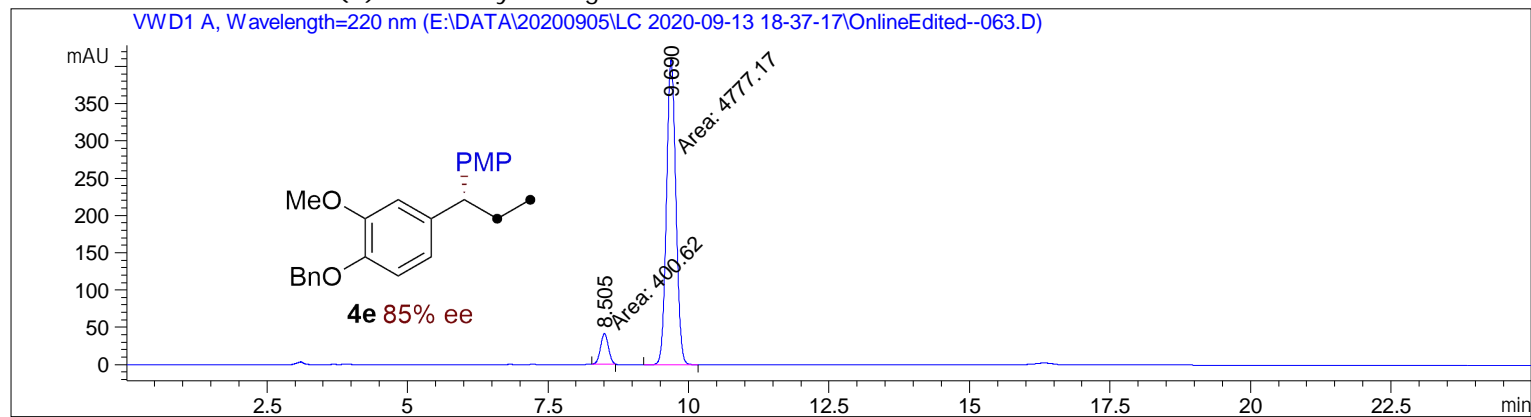

```

=====
                          Area Percent Report
=====

```

```

Sorted By      :      Signal
Multiplier     :      1.0000
Dilution       :      1.0000
Do not use Multiplier & Dilution Factor with ISTDs

```

Signal 1: VWD1 A, Wavelength=220 nm

| Peak # | RetTime [min] | Type | Width [min] | Area [mAU*s] | Height [mAU] | Area %  |
|--------|---------------|------|-------------|--------------|--------------|---------|
| 1      | 8.505         | MM   | 0.1624      | 400.61996    | 41.11270     | 7.7373  |
| 2      | 9.690         | MF   | 0.1947      | 4777.16895   | 408.85339    | 92.2627 |

```
Totals :                      5177.78891  449.96609
```

```

=====
*** End of Report ***

```



Sample Name: YH-17-163-RAC

```

=====
Acq. Operator   : SYSTEM                      Seq. Line :   69
Acq. Instrument : HPLC1260                   Location  : P1-A6
Injection Date  : 9/15/2020 2:02:19 AM      Inj       :    1
                                           Inj Volume: 3.000 µl
Different Inj Volume from Sample Entry! Actual Inj Volume : 1.000 µl
Acq. Method     : E:\DATA\20200905\LC 2020-09-13 18-37-17\10EtOH_25_8_1.M
Last changed    : 9/14/2020 8:28:42 PM by SYSTEM
Analysis Method : E:\DATA\20200905\LC 2020-09-13 18-37-17\10EtOH_25_8_1.M (Sequence Method)
Last changed    : 9/15/2020 2:57:52 PM by SYSTEM
                 (modified after loading)
Additional Info : Peak(s) manually integrated
  
```

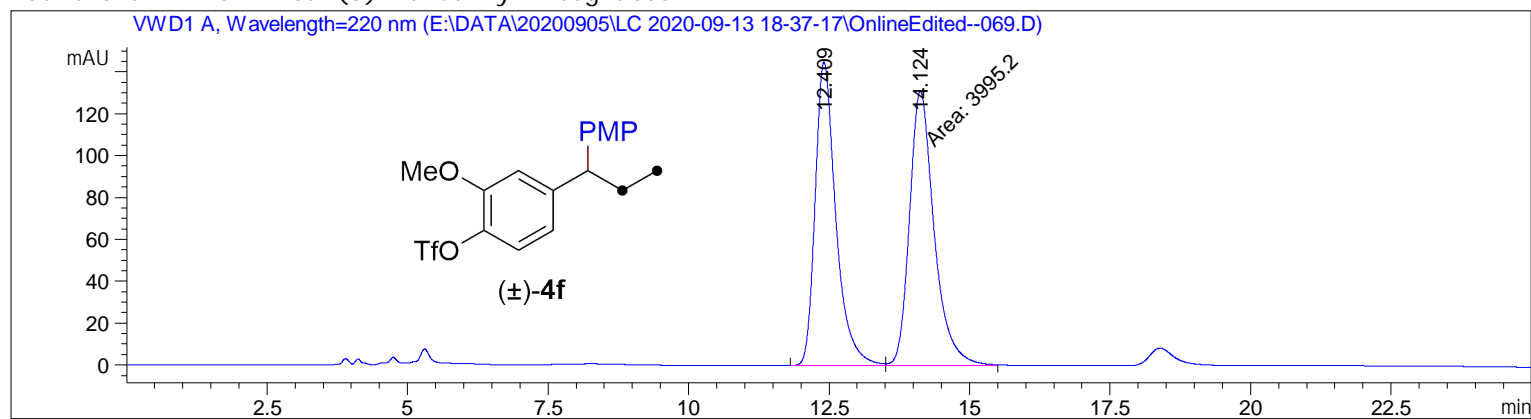

```

=====
                          Area Percent Report
=====
  
```

```

Sorted By      :      Signal
Multiplier     :      1.0000
Dilution      :      1.0000
Do not use Multiplier & Dilution Factor with ISTDs
  
```

Signal 1: VWD1 A, Wavelength=220 nm

| Peak # | RetTime [min] | Type | Width [min] | Area [mAU*s] | Height [mAU] | Area %  |
|--------|---------------|------|-------------|--------------|--------------|---------|
| 1      | 12.409        | BV   | 0.3871      | 3712.69434   | 144.81770    | 48.1674 |
| 2      | 14.124        | MF   | 0.5084      | 3995.20142   | 130.98309    | 51.8326 |

```
Totals :                      7707.89575  275.80080
```

```

=====
*** End of Report ***
  
```

Sample Name: YH-17-163-EE

```

=====
Acq. Operator   : SYSTEM                               Seq. Line :   70
Acq. Instrument : HPLC1260                             Location  : P1-A7
Injection Date  : 9/15/2020 2:28:04 AM                 Inj       :    1
                                                    Inj Volume: 3.000 µl
Different Inj Volume from Sample Entry! Actual Inj Volume : 1.000 µl
Acq. Method    : E:\DATA\20200905\LC 2020-09-13 18-37-17\10EtOH_25_8_1.M
Last changed   : 9/14/2020 8:28:42 PM by SYSTEM
Analysis Method: E:\DATA\20200905\LC 2020-09-13 18-37-17\10EtOH_25_8_1.M (Sequence Method)
Last changed   : 9/15/2020 2:57:52 PM by SYSTEM
                (modified after loading)
Additional Info : Peak(s) manually integrated
    
```

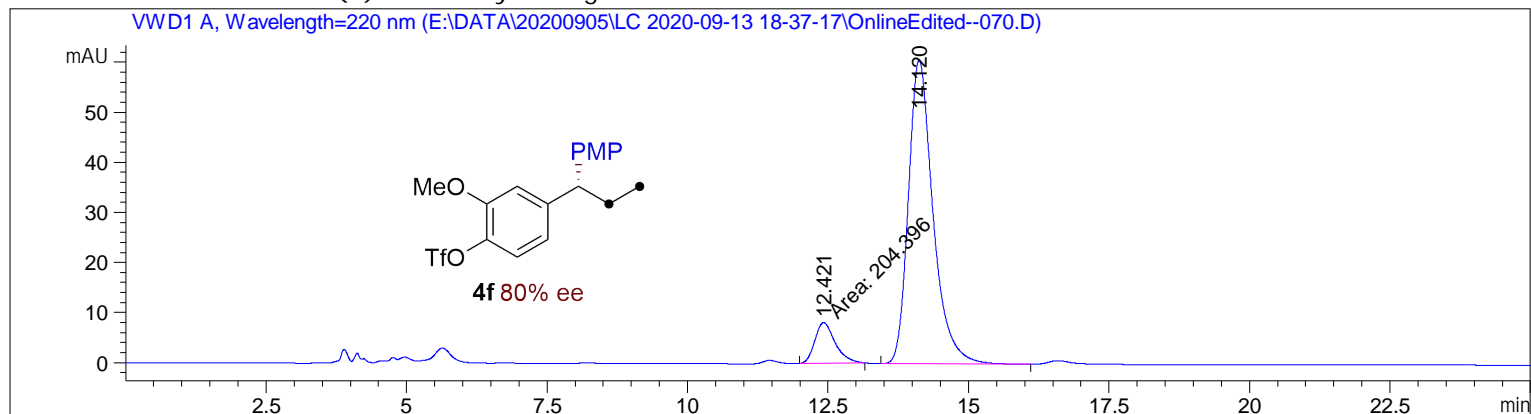

Area Percent Report

```

Sorted By      : Signal
Multiplier     : 1.0000
Dilution      : 1.0000
Do not use Multiplier & Dilution Factor with ISTDs
    
```

Signal 1: VWD1 A, Wavelength=220 nm

| Peak # | RetTime [min] | Type | Width [min] | Area [mAU*s] | Height [mAU] | Area %  |
|--------|---------------|------|-------------|--------------|--------------|---------|
| 1      | 12.421        | MM   | 0.4185      | 204.39621    | 8.14016      | 9.9366  |
| 2      | 14.120        | BB   | 0.4624      | 1852.61621   | 60.63935     | 90.0634 |

Totals : 2057.01242 68.77951

\*\*\* End of Report \*\*\*

Sample Name: YH-17-139-RAC

```

=====
Acq. Operator   : SYSTEM                               Seq. Line : 123
Acq. Instrument : HPLC1260                             Location  : P1-A1
Injection Date  : 9/9/2020 3:00:51 AM                  Inj       : 1
                                                    Inj Volume: 3.000 µl
Different Inj Volume from Sample Entry! Actual Inj Volume : 1.000 µl
Acq. Method     : E:\DATA\20200905\LC 2020-09-06 15-18-12\1ETOH_80_5_3.M
Last changed    : 9/7/2020 10:38:58 PM by SYSTEM
Analysis Method : E:\DATA\20200905\LC 2020-09-06 15-18-12\1ETOH_80_5_3.M (Sequence Method)
Last changed    : 9/9/2020 9:20:26 AM by SYSTEM
                  (modified after loading)
Additional Info : Peak(s) manually integrated
  
```

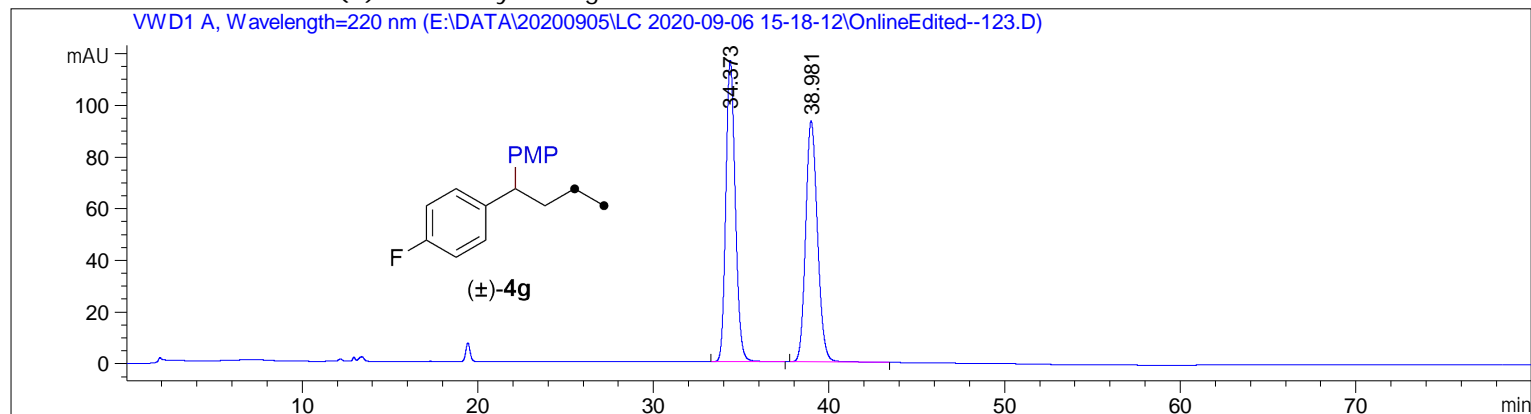

```

=====
                          Area Percent Report
=====
  
```

```

Sorted By      :      Signal
Multiplier     :      1.0000
Dilution       :      1.0000
Do not use Multiplier & Dilution Factor with ISTDs
  
```

Signal 1: VWD1 A, Wavelength=220 nm

| Peak # | RetTime [min] | Type | Width [min] | Area [mAU*s] | Height [mAU] | Area %  |
|--------|---------------|------|-------------|--------------|--------------|---------|
| 1      | 34.373        | BB   | 0.5767      | 4356.69092   | 116.66521    | 49.9836 |
| 2      | 38.981        | BB   | 0.7241      | 4359.55127   | 93.31073     | 50.0164 |

```
Totals :                      8716.24219  209.97594
```

```

=====
*** End of Report ***
  
```

Sample Name: YH-17-139-EE

```

=====
Acq. Operator   : SYSTEM                               Seq. Line : 124
Acq. Instrument : HPLC1260                             Location  : P1-A2
Injection Date  : 9/9/2020 4:21:36 AM                 Inj       : 1
                                                    Inj Volume: 3.000 µl
Different Inj Volume from Sample Entry! Actual Inj Volume : 1.000 µl
Acq. Method     : E:\DATA\20200905\LC 2020-09-06 15-18-12\1ETOH_80_5_3.M
Last changed    : 9/7/2020 10:38:58 PM by SYSTEM
Analysis Method : E:\DATA\20200905\LC 2020-09-06 15-18-12\1ETOH_80_5_3.M (Sequence Method)
Last changed    : 9/9/2020 9:20:26 AM by SYSTEM
                  (modified after loading)
Additional Info : Peak(s) manually integrated
  
```

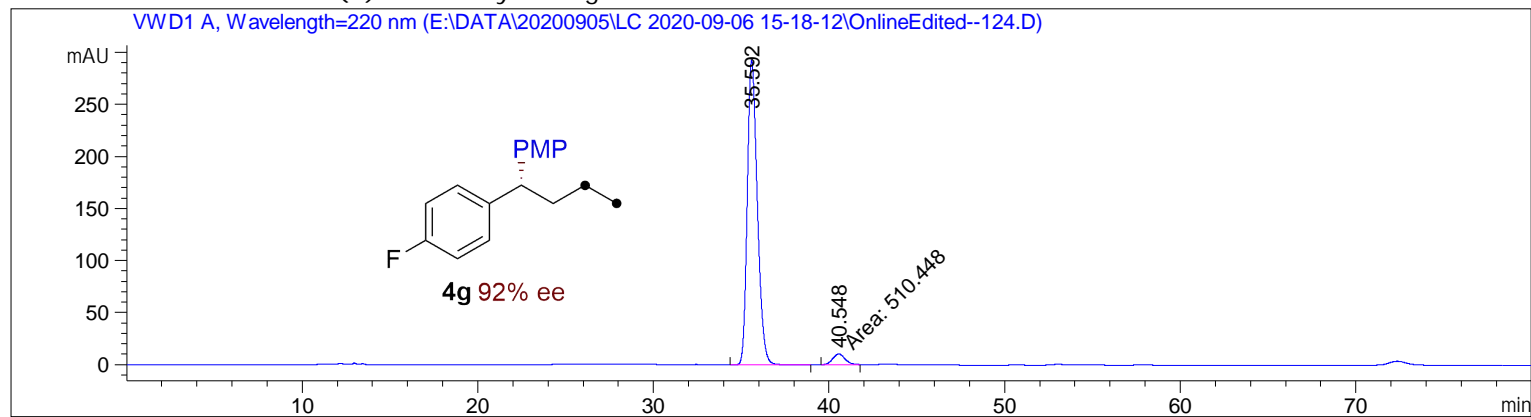

```

=====
                          Area Percent Report
=====
  
```

```

Sorted By      :      Signal
Multiplier     :      1.0000
Dilution       :      1.0000
Do not use Multiplier & Dilution Factor with ISTDs
  
```

Signal 1: VWD1 A, Wavelength=220 nm

| Peak # | RetTime [min] | Type | Width [min] | Area [mAU*s] | Height [mAU] | Area %  |
|--------|---------------|------|-------------|--------------|--------------|---------|
| 1      | 35.592        | BB   | 0.6119      | 1.16652e4    | 292.72021    | 95.8076 |
| 2      | 40.548        | MF   | 0.8214      | 510.44781    | 10.35777     | 4.1924  |

```
Totals :                1.21757e4  303.07798
```

```

=====
*** End of Report ***
  
```

Sample Name: YH-17-130-RAC

```

=====
Acq. Operator   : SYSTEM                               Seq. Line :    4
Acq. Instrument : HPLC1260                             Location  :   P1-A1
Injection Date  : 9/5/2020 3:34:37 PM                  Inj       :    1
                                                    Inj Volume: 3.000 µl
Different Inj Volume from Sample Entry! Actual Inj Volume : 0.500 µl
Acq. Method     : E:\DATA\20200905\LC 2020-09-05 14-35-09\11PA_20_5_2.M
Last changed    : 9/5/2020 3:46:58 PM by SYSTEM
                  (modified after loading)
Analysis Method : E:\DATA\20200905\LC 2020-09-05 14-35-09\11PA_20_5_2.M (Sequence Method)
Last changed    : 9/5/2020 4:25:03 PM by SYSTEM
                  (modified after loading)
Additional Info : Peak(s) manually integrated
=====

```

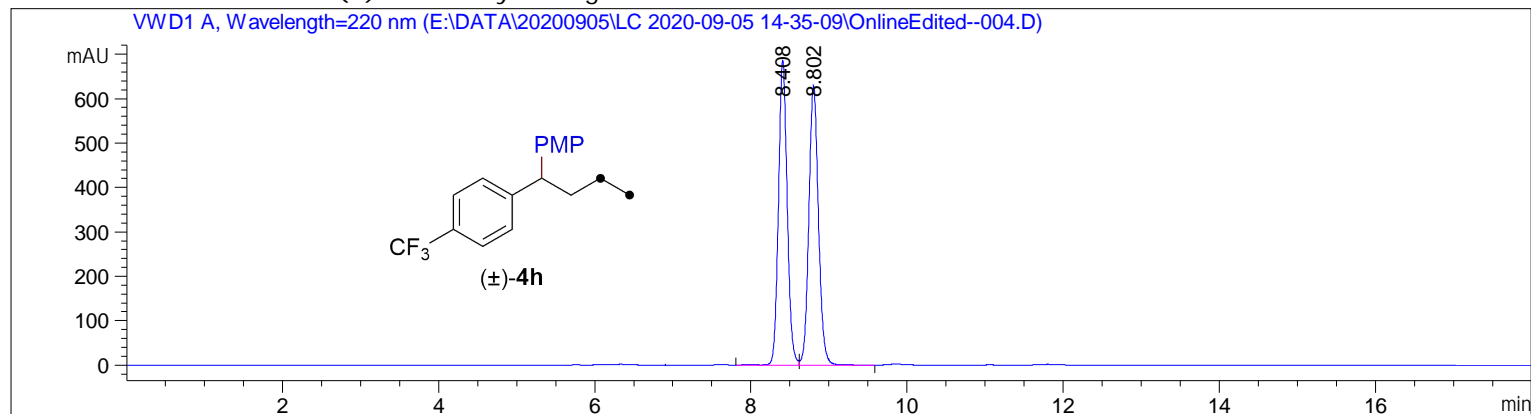

```

=====
                          Area Percent Report
=====

```

```

Sorted By      :      Signal
Multiplier     :      1.0000
Dilution       :      1.0000
Do not use Multiplier & Dilution Factor with ISTDs

```

Signal 1: VWD1 A, Wavelength=220 nm

| Peak # | RetTime [min] | Type | Width [min] | Area [mAU*s] | Height [mAU] | Area %  |
|--------|---------------|------|-------------|--------------|--------------|---------|
| 1      | 8.408         | VV R | 0.1196      | 5336.57178   | 686.96912    | 49.8828 |
| 2      | 8.802         | VB   | 0.1314      | 5361.65088   | 629.10931    | 50.1172 |

```
Totals :                      1.06982e4  1316.07843
```

```

=====
*** End of Report ***
=====

```

Sample Name: YH-17-130-EE2

```

=====
Acq. Operator   : SYSTEM                               Seq. Line :    6
Acq. Instrument : HPLC1260                             Location  : P1-A3
Injection Date  : 9/5/2020 4:12:07 PM                  Inj       :    1
                                                    Inj Volume: 3.000 µl
Different Inj Volume from Sample Entry! Actual Inj Volume : 0.600 µl
Acq. Method     : E:\DATA\20200905\LC 2020-09-05 14-35-09\11PA_20_5_2.M
Last changed    : 9/5/2020 3:46:58 PM by SYSTEM
Analysis Method : E:\DATA\20200905\LC 2020-09-05 14-35-09\11PA_20_5_2.M (Sequence Method)
Last changed    : 9/5/2020 3:52:45 PM by SYSTEM
Additional Info : Peak(s) manually integrated
=====

```

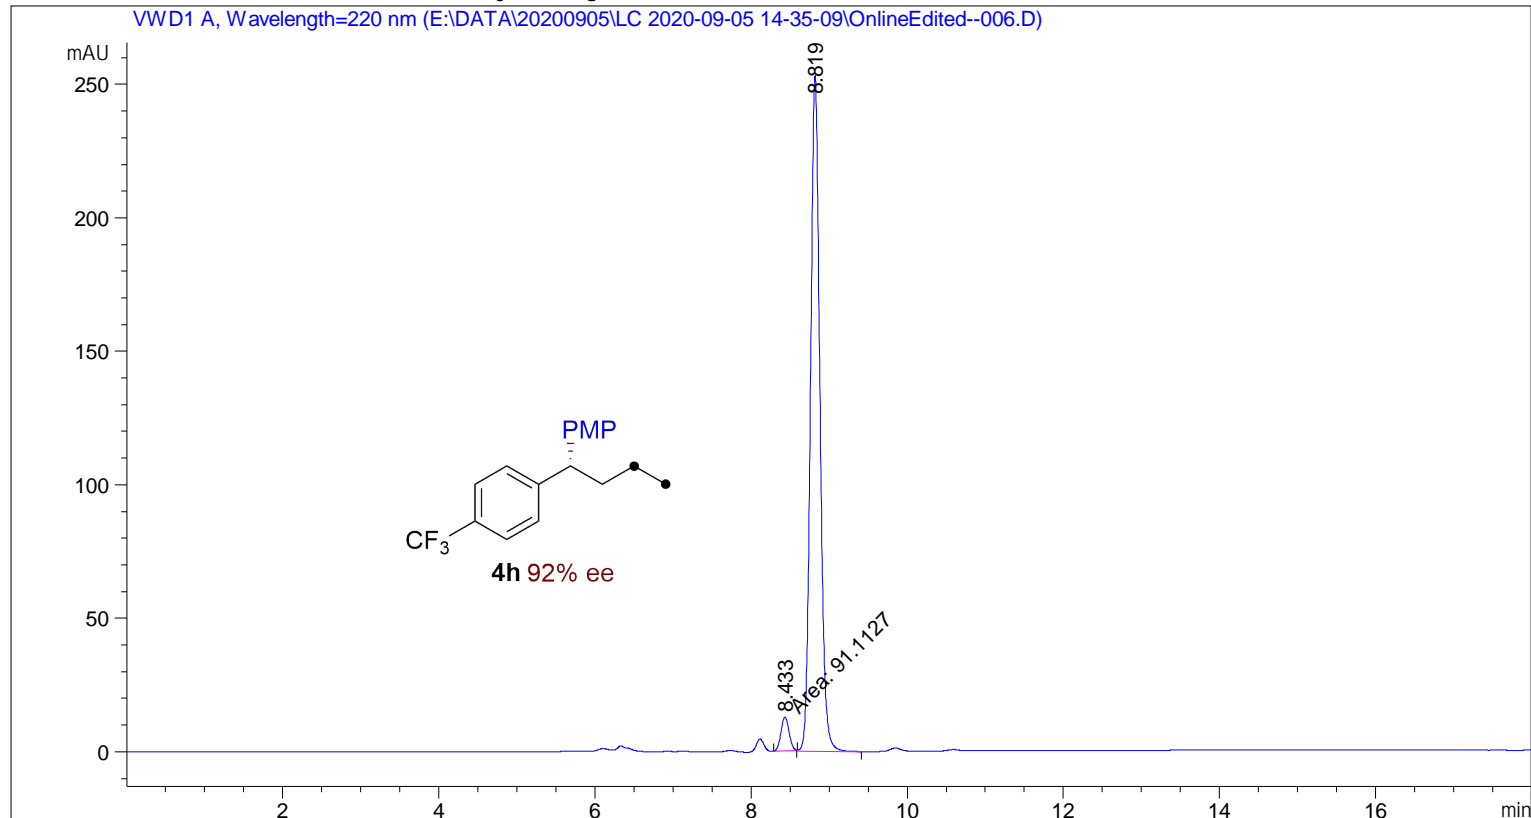

```

=====
                          Area Percent Report
=====

```

```

Sorted By      :      Signal
Multiplier     :      1.0000
Dilution       :      1.0000
Use Multiplier & Dilution Factor with ISTDs

```

Signal 1: VWD1 A, Wavelength=220 nm

| Peak # | RetTime [min] | Type | Width [min] | Area [mAU*s] | Height [mAU] | Area %  |
|--------|---------------|------|-------------|--------------|--------------|---------|
| 1      | 8.433         | MM   | 0.1195      | 91.11269     | 12.71069     | 4.1149  |
| 2      | 8.819         | VB   | 0.1299      | 213.07544    | 253.10728    | 95.8851 |

```
Totals :                2214.18813  265.81798
```

```
=====
Acq. Operator   : SYSTEM                               Seq. Line :   82
Acq. Instrument : HPLC1260                             Location  : P1-A1
Injection Date  : 9/10/2020 7:24:48 PM                Inj       :    4
                                                    Inj Volume: 3.000 µl
Different Inj Volume from Sample Entry! Actual Inj Volume : 1.000 µl
Acq. Method     : E:\DATA\20200905\LC 2020-09-09 14-34-17\11PA_40_5_4.M
Last changed    : 9/10/2020 7:44:03 PM by SYSTEM
                  (modified after loading)
Analysis Method : E:\DATA\20200905\LC 2020-09-09 14-34-17\11PA_40_5_4.M (Sequence Method)
Last changed    : 9/10/2020 8:00:32 PM by SYSTEM
                  (modified after loading)
Additional Info : Peak(s) manually integrated
=====
```

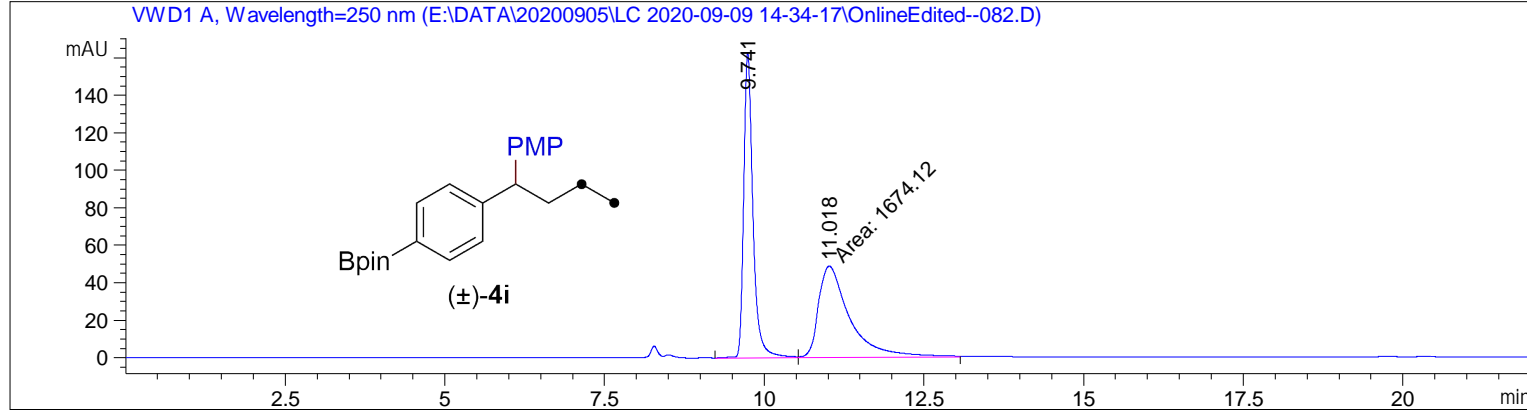

=====  
 Area Percent Report  
 =====

```
Sorted By      :      Signal
Multiplier     :      1.0000
Dilution      :      1.0000
Do not use Multiplier & Dilution Factor with ISTDs
```

Signal 1: VWD1 A, Wavelength=250 nm

| Peak # | RetTime [min] | Type | Width [min] | Area [mAU*s] | Height [mAU] | Area %  |
|--------|---------------|------|-------------|--------------|--------------|---------|
| 1      | 9.741         | VV R | 0.1516      | 1637.99194   | 162.52676    | 49.4546 |
| 2      | 11.018        | MF   | 0.5721      | 1674.11987   | 48.77103     | 50.5454 |

Totals :                    3312.11182   211.29780

=====  
 \*\*\* End of Report \*\*\*

Sample Name: YH-17-155-EE

```

=====
Acq. Operator   : SYSTEM                               Seq. Line :   83
Acq. Instrument : HPLC1260                             Location  : P1-A2
Injection Date  : 9/10/2020 7:47:35 PM                 Inj       :    1
                                                    Inj Volume: 3.000 µl
Acq. Method     : E:\DATA\20200905\LC 2020-09-09 14-34-17\11PA_40_5_4.M
Last changed    : 9/10/2020 7:44:03 PM by SYSTEM
Analysis Method : E:\DATA\20200905\LC 2020-09-09 14-34-17\11PA_40_5_4.M (Sequence Method)
Last changed    : 9/10/2020 8:26:35 PM by SYSTEM
                  (modified after loading)
Additional Info  : Peak(s) manually integrated
=====

```

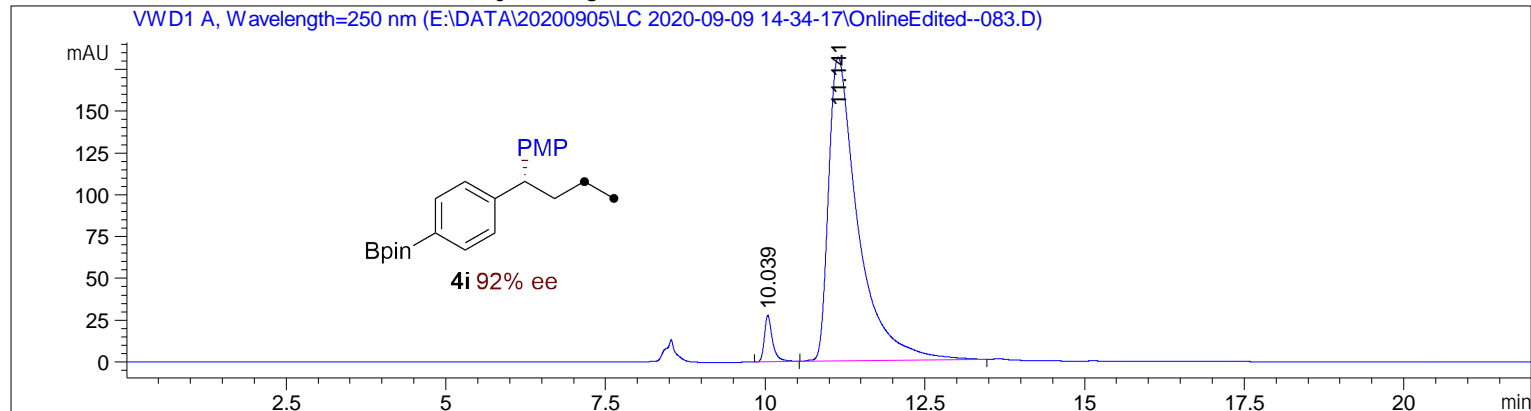

```

=====
                          Area Percent Report
=====

```

```

Sorted By           :      Signal
Multiplier          :      1.0000
Dilution            :      1.0000
Do not use Multiplier & Dilution Factor with ISTDs

```

Signal 1: VWD1 A, Wavelength=250 nm

| Peak # | RetTime [min] | Type | Width [min] | Area [mAU*s] | Height [mAU] | Area %  |
|--------|---------------|------|-------------|--------------|--------------|---------|
| 1      | 10.039        | BB   | 0.1305      | 243.71513    | 27.74428     | 4.0130  |
| 2      | 11.141        | BB   | 0.4706      | 5829.43262   | 181.53410    | 95.9870 |

```
Totals :                6073.14775  209.27839
```

```

=====
*** End of Report ***
=====

```



Sample Name: YH-17-133-RAC

```

=====
Acq. Operator   : SYSTEM                      Seq. Line :   91
Acq. Instrument : HPLC1260                   Location  : P1-A3
Injection Date  : 9/8/2020 2:19:49 PM        Inj       :    1
                                           Inj Volume: 3.000 µl
Different Inj Volume from Sample Entry! Actual Inj Volume : 0.500 µl
Acq. Method     : E:\DATA\20200905\LC 2020-09-06 15-18-12\51PA_25_8_2.M
Last changed    : 9/8/2020 2:03:49 PM by SYSTEM
Analysis Method : E:\DATA\20200905\LC 2020-09-06 15-18-12\51PA_25_8_2.M (Sequence Method)
Last changed    : 9/8/2020 3:04:46 PM by SYSTEM
                 (modified after loading)
Additional Info : Peak(s) manually integrated

```

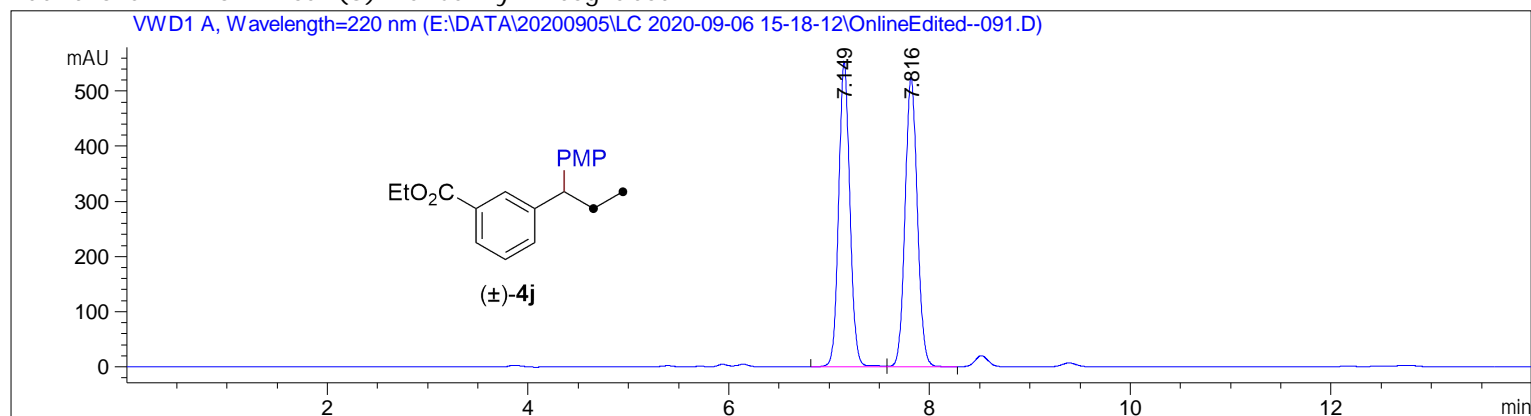

```

=====
                          Area Percent Report
=====

```

```

Sorted By      :      Signal
Multiplier     :      1.0000
Dilution       :      1.0000
Do not use Multiplier & Dilution Factor with ISTDs

```

Signal 1: VWD1 A, Wavelength=220 nm

| Peak # | RetTime [min] | Type | Width [min] | Area [mAU*s] | Height [mAU] | Area %  |
|--------|---------------|------|-------------|--------------|--------------|---------|
| 1      | 7.149         | BV R | 0.1204      | 4298.37500   | 552.23834    | 49.1222 |
| 2      | 7.816         | VB   | 0.1310      | 4451.99170   | 524.52710    | 50.8778 |

```
Totals :                      8750.36670 1076.76544
```

```

=====
*** End of Report ***

```

Sample Name: YH-17-133-EE

```

=====
Acq. Operator   : SYSTEM                      Seq. Line :   92
Acq. Instrument : HPLC1260                   Location  : P1-A4
Injection Date  : 9/8/2020 2:34:31 PM        Inj       :    1
                                           Inj Volume: 3.000 µl
Different Inj Volume from Sample Entry! Actual Inj Volume : 0.500 µl
Acq. Method     : E:\DATA\20200905\LC 2020-09-06 15-18-12\51PA_25_8_2.M
Last changed    : 9/8/2020 2:03:49 PM by SYSTEM
Analysis Method : E:\DATA\20200905\LC 2020-09-06 15-18-12\51PA_25_8_2.M (Sequence Method)
Last changed    : 9/8/2020 3:04:46 PM by SYSTEM
                 (modified after loading)
Additional Info : Peak(s) manually integrated

```

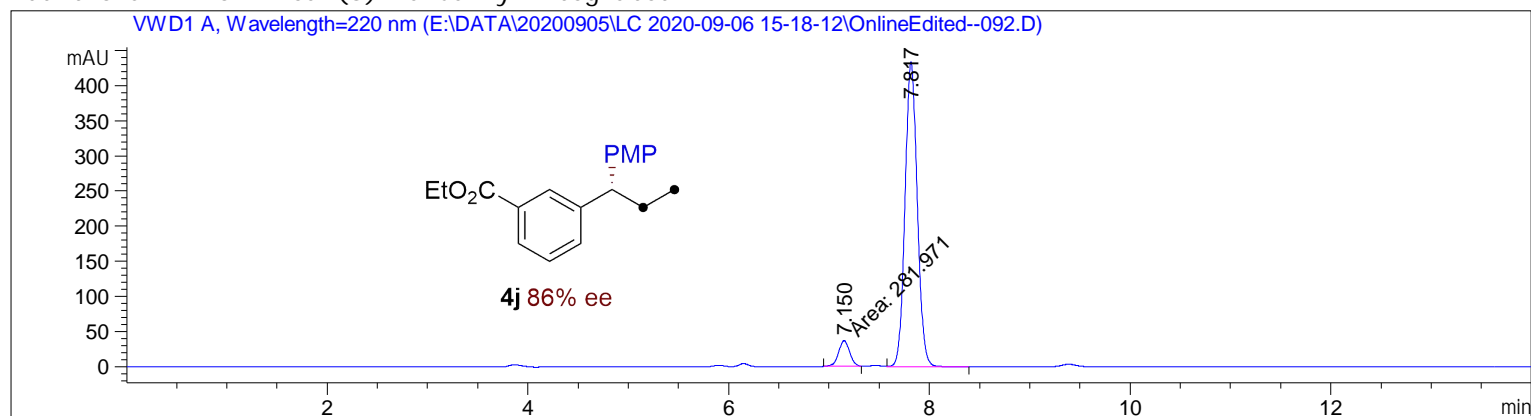

```

=====
                          Area Percent Report
=====

```

```

Sorted By      :      Signal
Multiplier     :      1.0000
Dilution      :      1.0000
Do not use Multiplier & Dilution Factor with ISTDs

```

Signal 1: VWD1 A, Wavelength=220 nm

| Peak # | RetTime [min] | Type | Width [min] | Area [mAU*s] | Height [mAU] | Area %  |
|--------|---------------|------|-------------|--------------|--------------|---------|
| 1      | 7.150         | MM   | 0.1281      | 281.97110    | 36.67854     | 7.1251  |
| 2      | 7.817         | VB   | 0.1310      | 3675.43799   | 433.33679    | 92.8749 |

```
Totals :                      3957.40909  470.01534
```

```

=====
*** End of Report ***

```

Sample Name: YH-17-134-RAC

```

=====
Acq. Operator   : SYSTEM                      Seq. Line :   93
Acq. Instrument : HPLC1260                   Location  : P1-A5
Injection Date  : 9/8/2020 2:49:14 PM        Inj       :    1
                                           Inj Volume: 3.000 µl
Different Inj Volume from Sample Entry! Actual Inj Volume : 0.500 µl
Acq. Method     : E:\DATA\20200905\LC 2020-09-06 15-18-12\51PA_25_8_2.M
Last changed    : 9/8/2020 2:03:49 PM by SYSTEM
Analysis Method  : E:\DATA\20200905\LC 2020-09-06 15-18-12\51PA_25_8_2.M (Sequence Method)
Last changed    : 9/8/2020 3:05:48 PM by SYSTEM
                 (modified after loading)
Additional Info  : Peak(s) manually integrated
  
```

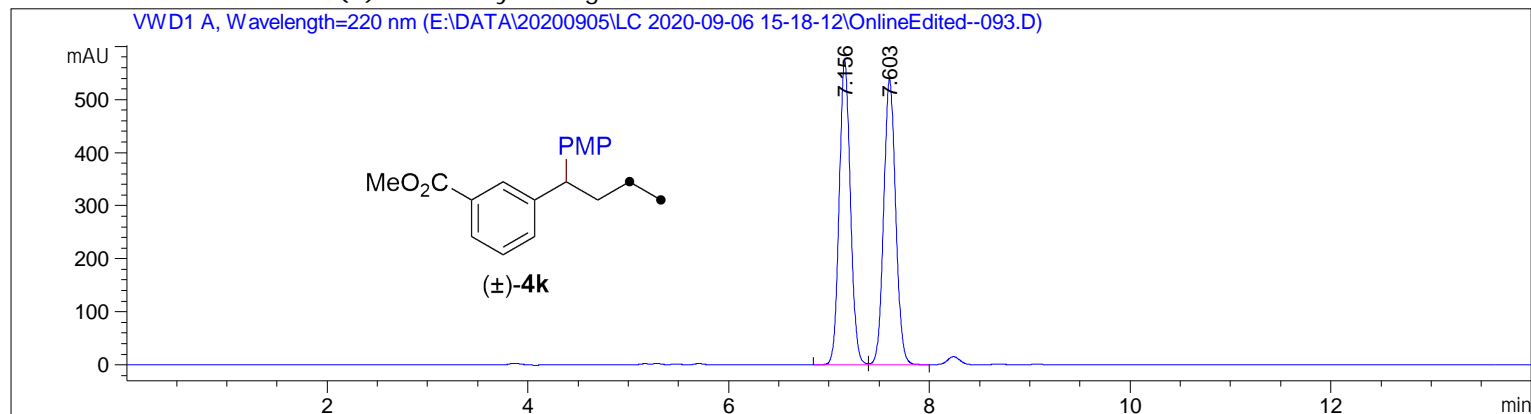

```

=====
                          Area Percent Report
=====
  
```

```

Sorted By      :      Signal
Multiplier     :      1.0000
Dilution       :      1.0000
Do not use Multiplier & Dilution Factor with ISTDs
  
```

Signal 1: VWD1 A, Wavelength=220 nm

| Peak # | RetTime [min] | Type | Width [min] | Area [mAU*s] | Height [mAU] | Area %  |
|--------|---------------|------|-------------|--------------|--------------|---------|
| 1      | 7.156         | BV   | 0.1194      | 4448.94434   | 574.02832    | 49.9165 |
| 2      | 7.603         | VV   | 0.1287      | 4463.82129   | 538.47260    | 50.0835 |

```
Totals :                      8912.76563 1112.50092
```

```

=====
*** End of Report ***
  
```

Sample Name: YH-17-134-EE

```

=====
Acq. Operator   : SYSTEM                      Seq. Line :   94
Acq. Instrument : HPLC1260                   Location  : P1-A6
Injection Date  : 9/8/2020 3:03:57 PM        Inj       :    1
                                           Inj Volume: 3.000 µl
Different Inj Volume from Sample Entry! Actual Inj Volume : 0.500 µl
Acq. Method     : E:\DATA\20200905\LC 2020-09-06 15-18-12\51PA_25_8_2.M
Last changed    : 9/8/2020 2:03:49 PM by SYSTEM
Analysis Method : E:\DATA\20200905\LC 2020-09-06 15-18-12\51PA_25_8_2.M (Sequence Method)
Last changed    : 9/8/2020 3:27:14 PM by SYSTEM
                 (modified after loading)
Additional Info : Peak(s) manually integrated
  
```

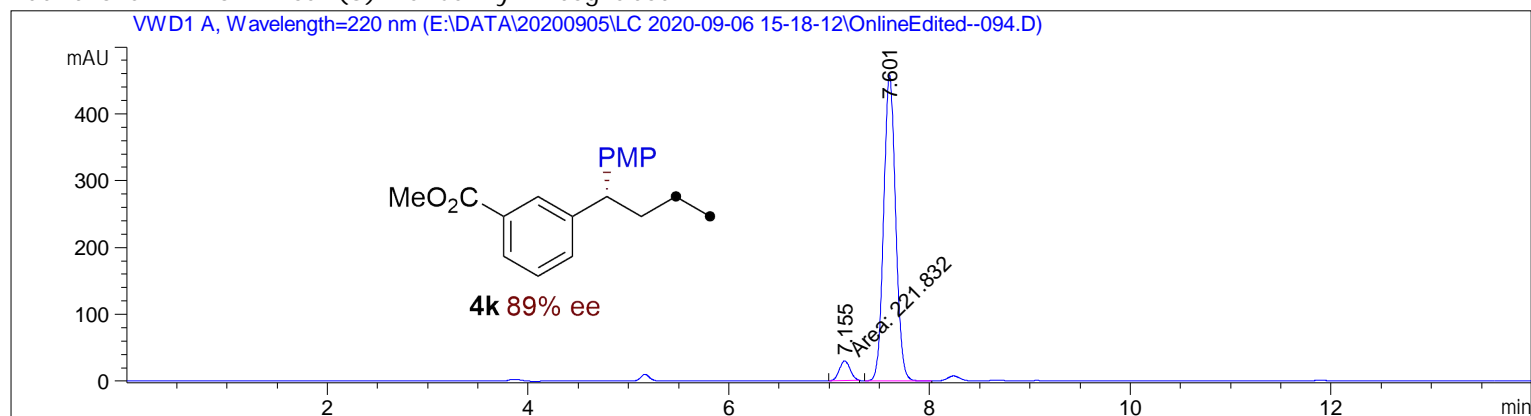

```

=====
                          Area Percent Report
=====
  
```

```

Sorted By      :      Signal
Multiplier     :      1.0000
Dilution       :      1.0000
Do not use Multiplier & Dilution Factor with ISTDs
  
```

Signal 1: VWD1 A, Wavelength=220 nm

| Peak # | RetTime [min] | Type | Width [min] | Area [mAU*s] | Height [mAU] | Area %  |
|--------|---------------|------|-------------|--------------|--------------|---------|
| 1      | 7.155         | MM   | 0.1241      | 221.83202    | 29.79492     | 5.5158  |
| 2      | 7.601         | VB   | 0.1277      | 3799.90894   | 458.56464    | 94.4842 |

```
Totals :                      4021.74095  488.35956
```

```

=====
*** End of Report ***
  
```

Sample Name: YH-17-141-RAC

```

=====
Acq. Operator   : SYSTEM                               Seq. Line :   13
Acq. Instrument : HPLC1260                           Location  :   P1-A2
Injection Date  : 9/9/2020 6:13:58 PM                 Inj       :    1
                                                    Inj Volume: 3.000 µl
Different Inj Volume from Sample Entry! Actual Inj Volume : 1.000 µl
Acq. Method     : E:\DATA\20200905\LC 2020-09-09 14-34-17\51PA_20_8_3.M
Last changed    : 9/9/2020 6:07:48 PM by SYSTEM
Analysis Method : E:\DATA\20200905\LC 2020-09-09 14-34-17\51PA_20_8_3.M (Sequence Method)
Last changed    : 9/9/2020 7:18:56 PM by SYSTEM
                  (modified after loading)
Additional Info : Peak(s) manually integrated
  
```

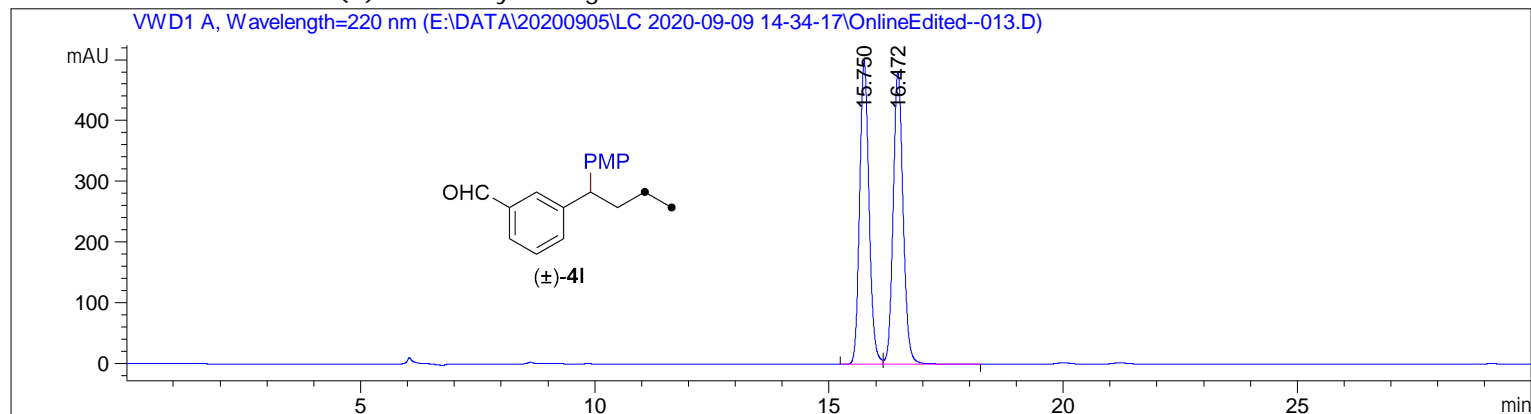

```

=====
                          Area Percent Report
=====
  
```

```

Sorted By      :      Signal
Multiplier     :      1.0000
Dilution       :      1.0000
Do not use Multiplier & Dilution Factor with ISTDs
  
```

Signal 1: VWD1 A, Wavelength=220 nm

| Peak # | RetTime [min] | Type | Width [min] | Area [mAU*s] | Height [mAU] | Area %  |
|--------|---------------|------|-------------|--------------|--------------|---------|
| 1      | 15.750        | BV   | 0.2154      | 6964.64014   | 500.38995    | 49.5307 |
| 2      | 16.472        | VB   | 0.2285      | 7096.62207   | 479.83856    | 50.4693 |

```
Totals :                1.40613e4   980.22852
```

```

=====
*** End of Report ***
  
```

Sample Name: YH-17-141-EE

```

=====
Acq. Operator   : SYSTEM                               Seq. Line :   14
Acq. Instrument : HPLC1260                             Location  : P1-A4
Injection Date  : 9/9/2020 6:44:43 PM                 Inj       :    1
                                                    Inj Volume: 3.000 µl
Different Inj Volume from Sample Entry! Actual Inj Volume : 1.000 µl
Acq. Method     : E:\DATA\20200905\LC 2020-09-09 14-34-17\51PA_20_8_3.M
Last changed    : 9/9/2020 6:07:48 PM by SYSTEM
Analysis Method : E:\DATA\20200905\LC 2020-09-09 14-34-17\51PA_20_8_3.M (Sequence Method)
Last changed    : 9/9/2020 7:18:56 PM by SYSTEM
                (modified after loading)
Additional Info : Peak(s) manually integrated
    
```

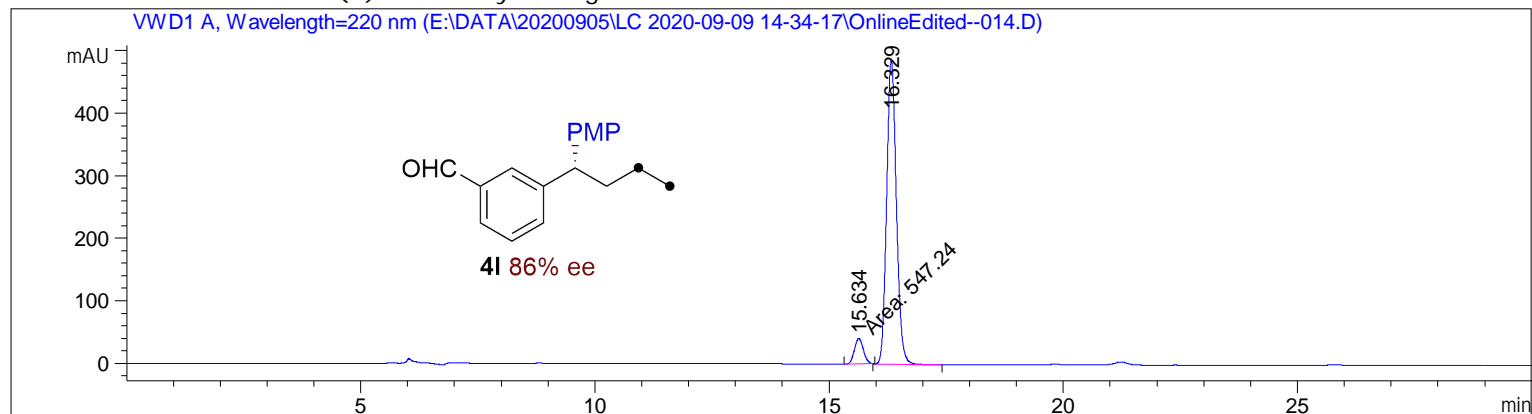

=====  
 Area Percent Report  
 =====

```

Sorted By      :      Signal
Multiplier     :      1.0000
Dilution      :      1.0000
Do not use Multiplier & Dilution Factor with ISTDs
    
```

Signal 1: VWD1 A, Wavelength=220 nm

| Peak # | RetTime [min] | Type | Width [min] | Area [mAU*s] | Height [mAU] | Area %  |
|--------|---------------|------|-------------|--------------|--------------|---------|
| 1      | 15.634        | MM   | 0.2229      | 547.23956    | 40.90938     | 7.2131  |
| 2      | 16.329        | VB   | 0.2238      | 7039.51855   | 486.58237    | 92.7869 |

Totals :                      7586.75812   527.49175

=====  
 \*\*\* End of Report \*\*\*

Sample Name: YH-17-161-RAC

```

=====
Acq. Operator   : SYSTEM                               Seq. Line :   37
Acq. Instrument : HPLC1260                             Location  : P1-A1
Injection Date  : 9/12/2020 3:14:35 AM                 Inj       :    1
                                                    Inj Volume: 3.000 µl
Different Inj Volume from Sample Entry! Actual Inj Volume : 1.000 µl
Acq. Method     : E:\DATA\20200905\LC 2020-09-11 08-36-22\1ETOH_60_5_3.M
Last changed    : 9/11/2020 8:29:14 PM by SYSTEM
Analysis Method : E:\DATA\20200905\LC 2020-09-11 08-36-22\1ETOH_60_5_3.M (Sequence Method)
Last changed    : 9/15/2020 6:39:26 PM by SYSTEM
                  (modified after loading)
    
```

Additional Info : Peak(s) manually integrated

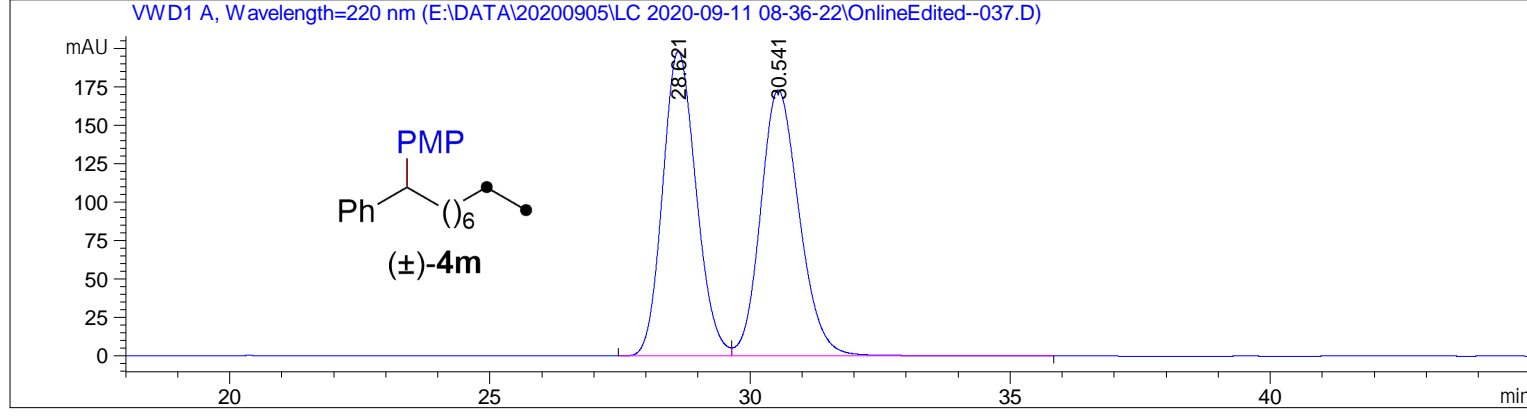

Area Percent Report

```

Sorted By      : Signal
Multiplier     : 1.0000
Dilution       : 1.0000
Do not use Multiplier & Dilution Factor with ISTDs
    
```

Signal 1: VWD1 A, Wavelength=220 nm

| Peak # | RetTime [min] | Type | Width [min] | Area [mAU*s] | Height [mAU] | Area %  |
|--------|---------------|------|-------------|--------------|--------------|---------|
| 1      | 28.621        | BV   | 0.6944      | 8867.06055   | 198.40100    | 49.6974 |
| 2      | 30.541        | VB   | 0.7973      | 8975.05762   | 173.28355    | 50.3026 |

Totals : 1.78421e4 371.68456

\*\*\* End of Report \*\*\*

Sample Name: YH-17-161-EE1

```

=====
Acq. Operator   : SYSTEM                               Seq. Line :   38
Acq. Instrument : HPLC1260                             Location  : P1-A2
Injection Date  : 9/12/2020 4:15:20 AM                 Inj       :    1
                                                    Inj Volume: 3.000 µl
Different Inj Volume from Sample Entry! Actual Inj Volume : 1.000 µl
Acq. Method     : E:\DATA\20200905\LC 2020-09-11 08-36-22\1ETOH_60_5_3.M
Last changed    : 9/11/2020 8:29:14 PM by SYSTEM
Analysis Method : E:\DATA\20200905\LC 2020-09-11 08-36-22\1ETOH_60_5_3.M (Sequence Method)
Last changed    : 9/15/2020 6:39:26 PM by SYSTEM
                  (modified after loading)
Additional Info : Peak(s) manually integrated
  
```

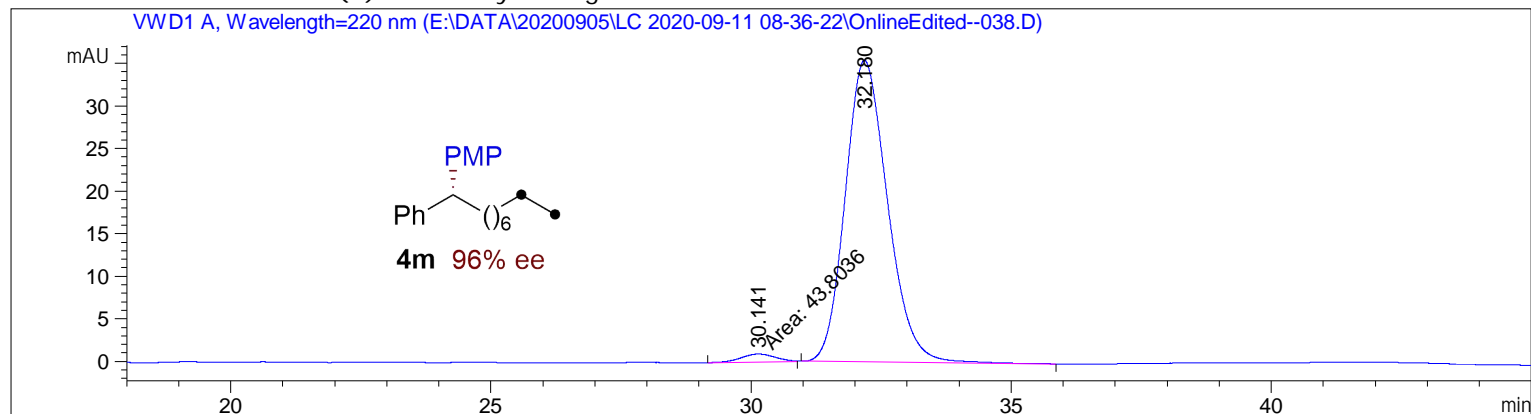

```

=====
                          Area Percent Report
=====
  
```

```

Sorted By      :      Signal
Multiplier     :      1.0000
Dilution       :      1.0000
Do not use Multiplier & Dilution Factor with ISTDs
  
```

Signal 1: VWD1 A, Wavelength=220 nm

| Peak # | RetTime [min] | Type | Width [min] | Area [mAU*s] | Height [mAU] | Area %  |
|--------|---------------|------|-------------|--------------|--------------|---------|
| 1      | 30.141        | MM   | 0.7755      | 43.80361     | 9.41372e-1   | 2.1410  |
| 2      | 32.180        | BB   | 0.8646      | 2002.12549   | 35.41506     | 97.8590 |

```
Totals :                2045.92910    36.35643
```

```

=====
*** End of Report ***
  
```



Sample Name: YH-17-161-EE2

```

=====
Acq. Operator   : SYSTEM                               Seq. Line :   39
Acq. Instrument : HPLC1260                             Location  : P1-A3
Injection Date  : 9/12/2020 5:16:05 AM                 Inj       :    1
                                                    Inj Volume: 3.000 µl
Different Inj Volume from Sample Entry! Actual Inj Volume : 1.000 µl
Acq. Method     : E:\DATA\20200905\LC 2020-09-11 08-36-22\1ETOH_60_5_3.M
Last changed    : 9/11/2020 8:29:14 PM by SYSTEM
Analysis Method : E:\DATA\20200905\LC 2020-09-11 08-36-22\1ETOH_60_5_3.M (Sequence Method)
Last changed    : 9/15/2020 6:39:26 PM by SYSTEM
                (modified after loading)
=====

```

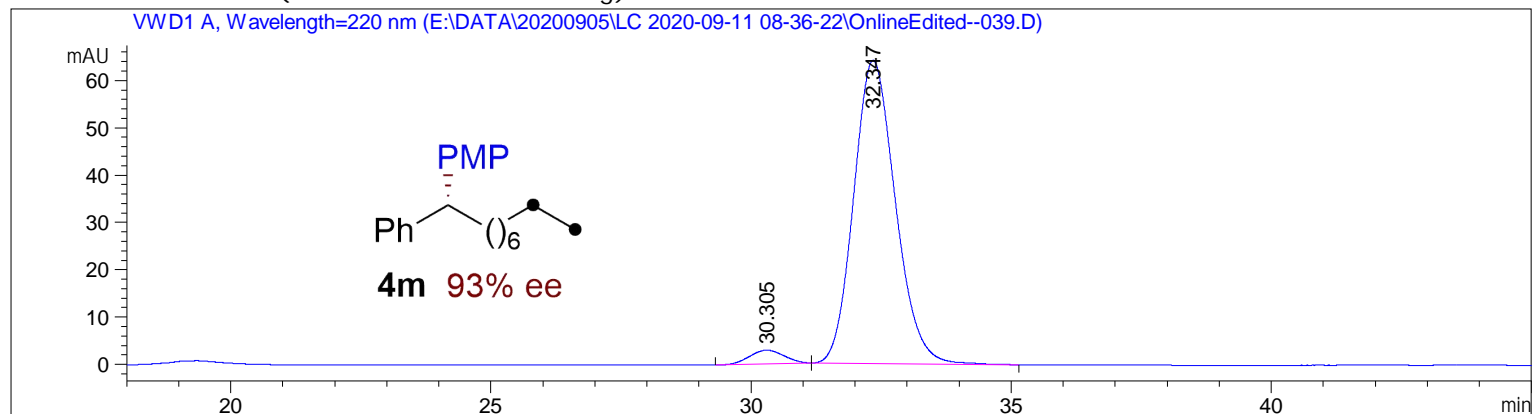

```

=====
                          Area Percent Report
=====

```

```

Sorted By      :      Signal
Multiplier     :      1.0000
Dilution       :      1.0000
Do not use Multiplier & Dilution Factor with ISTDs

```

Signal 1: VWD1 A, Wavelength=220 nm

| Peak # | RetTime [min] | Type | Width [min] | Area [mAU*s] | Height [mAU] | Area %  |
|--------|---------------|------|-------------|--------------|--------------|---------|
| 1      | 30.305        | BB   | 0.6861      | 134.16422    | 2.91444      | 3.6283  |
| 2      | 32.347        | BB   | 0.8588      | 3563.58740   | 64.08324     | 96.3717 |

```
Totals :                3697.75162    66.99769
```

```

=====
*** End of Report ***
=====

```

Sample Name: YH-17-173-RAC

```

=====
Acq. Operator   : SYSTEM                               Seq. Line : 139
Acq. Instrument : HPLC1260                             Location  : P1-B1
Injection Date  : 9/16/2020 9:46:23 PM                Inj       : 1
                                                    Inj Volume: 3.000 µl
Different Inj Volume from Sample Entry! Actual Inj Volume : 0.200 µl
Acq. Method     : E:\DATA\20200905\LC 2020-09-13 18-37-17\20EtOH_20_5_1.M
Last changed    : 9/16/2020 9:10:36 PM by SYSTEM
Analysis Method : E:\DATA\20200905\LC 2020-09-13 18-37-17\20EtOH_20_5_1.M (Sequence Method)
Last changed    : 9/17/2020 9:24:25 AM by SYSTEM
                  (modified after loading)
Additional Info : Peak(s) manually integrated
  
```

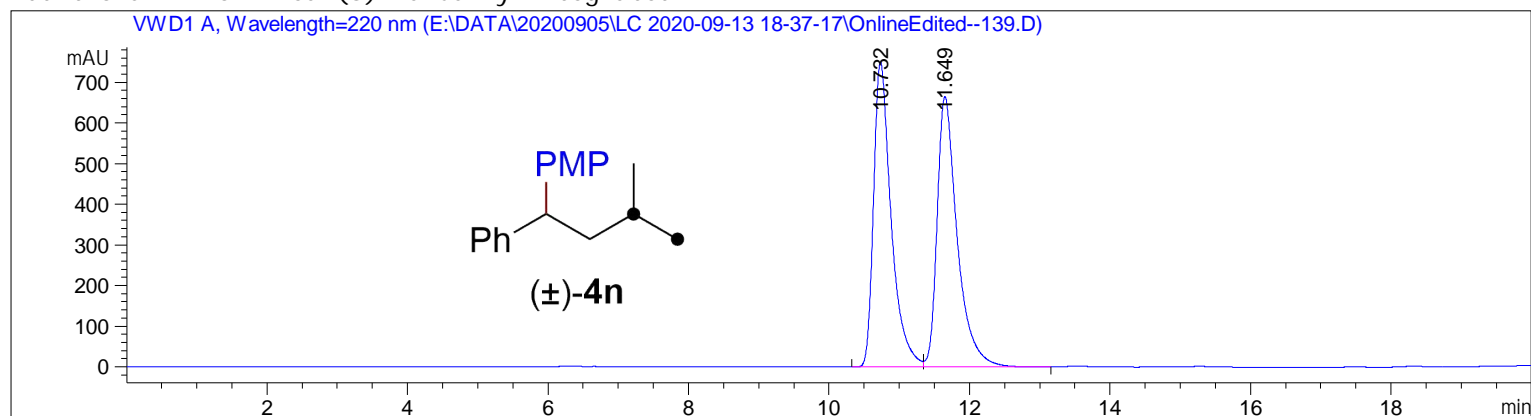

```

=====
                          Area Percent Report
=====
  
```

```

Sorted By      :      Signal
Multiplier     :      1.0000
Dilution       :      1.0000
Do not use Multiplier & Dilution Factor with ISTDs
  
```

Signal 1: VWD1 A, Wavelength=220 nm

| Peak # | RetTime [min] | Type | Width [min] | Area [mAU*s] | Height [mAU] | Area %  |
|--------|---------------|------|-------------|--------------|--------------|---------|
| 1      | 10.732        | BV   | 0.2598      | 1.30364e4    | 749.81757    | 49.6103 |
| 2      | 11.649        | VB   | 0.2951      | 1.32412e4    | 665.68225    | 50.3897 |

```
Totals :                2.62776e4  1415.49982
```

```

=====
*** End of Report ***
  
```

Sample Name: YH-17-173-EE

```

=====
Acq. Operator   : SYSTEM                               Seq. Line : 140
Acq. Instrument : HPLC1260                           Location  : P1-B2
Injection Date  : 9/16/2020 10:07:12 PM              Inj       : 1
                                                    Inj Volume: 3.000 µl
Different Inj Volume from Sample Entry! Actual Inj Volume : 8.000 µl
Acq. Method     : E:\DATA\20200905\LC 2020-09-13 18-37-17\20EtOH_20_5_1.M
Last changed    : 9/16/2020 9:10:36 PM by SYSTEM
Analysis Method : E:\DATA\20200905\LC 2020-09-13 18-37-17\20EtOH_20_5_1.M (Sequence Method)
Last changed    : 9/17/2020 9:24:25 AM by SYSTEM
                  (modified after loading)
Additional Info : Peak(s) manually integrated
  
```

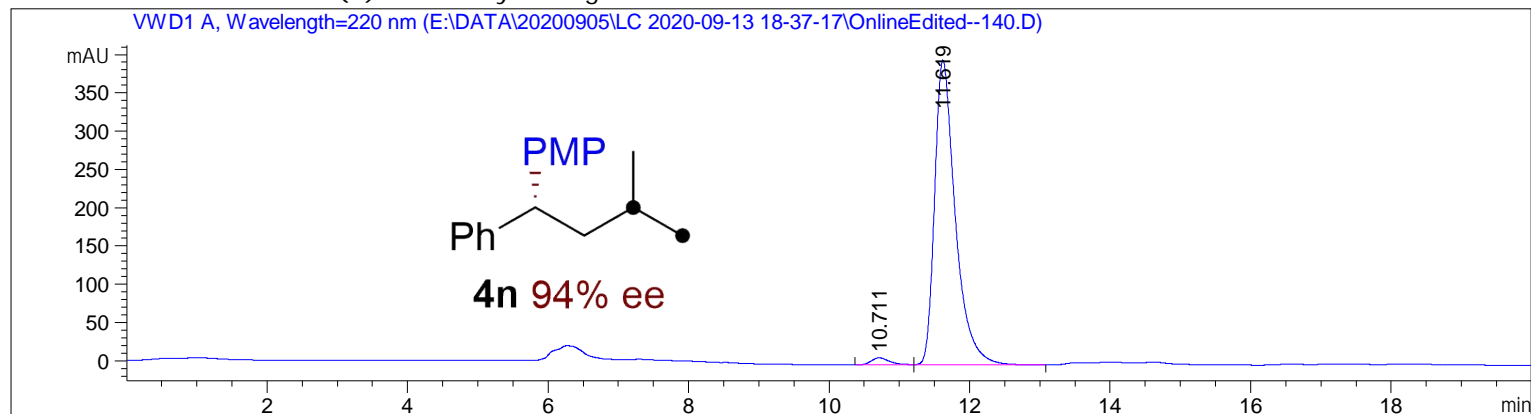

```

=====
                          Area Percent Report
=====
  
```

```

Sorted By      :      Signal
Multiplier     :      1.0000
Dilution       :      1.0000
Do not use Multiplier & Dilution Factor with ISTDs
  
```

Signal 1: VWD1 A, Wavelength=220 nm

| Peak # | RetTime [min] | Type | Width [min] | Area [mAU*s] | Height [mAU] | Area %  |
|--------|---------------|------|-------------|--------------|--------------|---------|
| 1      | 10.711        | BV   | 0.2739      | 165.10509    | 9.17757      | 1.9828  |
| 2      | 11.619        | VB   | 0.3072      | 8161.65186   | 398.03119    | 98.0172 |

```
Totals :                      8326.75694  407.20876
```

```

=====
*** End of Report ***
  
```

Sample Name: YH-17-166-RAC

```

=====
Acq. Operator   : SYSTEM                      Seq. Line : 108
Acq. Instrument : HPLC1260                   Location  : P1-C1
Injection Date  : 9/16/2020 12:07:31 AM      Inj       : 1
                                           Inj Volume: 3.000 µl
Different Inj Volume from Sample Entry! Actual Inj Volume : 1.000 µl
Acq. Method     : E:\DATA\20200905\LC 2020-09-13 18-37-17\101PA_60_8_1.M
Last changed    : 9/15/2020 3:44:04 PM by SYSTEM
Analysis Method : E:\DATA\20200905\LC 2020-09-13 18-37-17\101PA_60_8_1.M (Sequence Method)
Last changed    : 9/16/2020 9:18:31 AM by SYSTEM
                  (modified after loading)
Additional Info : Peak(s) manually integrated
  
```

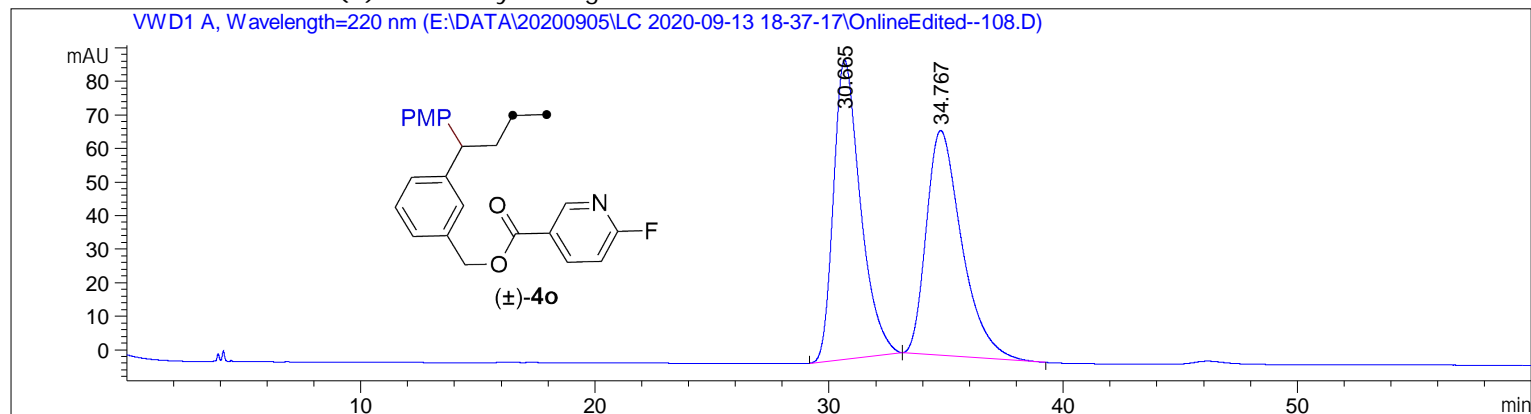

```

=====
                          Area Percent Report
=====
  
```

```

Sorted By      :      Signal
Multiplier     :      1.0000
Dilution       :      1.0000
Do not use Multiplier & Dilution Factor with ISTDs
  
```

Signal 1: VWD1 A, Wavelength=220 nm

| Peak # | RetTime [min] | Type | Width [min] | Area [mAU*s] | Height [mAU] | Area %  |
|--------|---------------|------|-------------|--------------|--------------|---------|
| 1      | 30.665        | BB   | 1.2106      | 7133.66357   | 89.14415     | 50.2737 |
| 2      | 34.767        | BB   | 1.5855      | 7056.00000   | 67.01034     | 49.7263 |

```
Totals :                      1.41897e4  156.15449
```

```

=====
*** End of Report ***
  
```

Sample Name: YH-17-166-EE

```

=====
Acq. Operator   : SYSTEM                      Seq. Line : 109
Acq. Instrument : HPLC1260                   Location  : P1-C2
Injection Date  : 9/16/2020 1:08:16 AM      Inj       : 1
                                           Inj Volume: 3.000 µl
Different Inj Volume from Sample Entry! Actual Inj Volume : 1.000 µl
Acq. Method     : E:\DATA\20200905\LC 2020-09-13 18-37-17\101PA_60_8_1.M
Last changed    : 9/15/2020 3:44:04 PM by SYSTEM
Analysis Method : E:\DATA\20200905\LC 2020-09-13 18-37-17\101PA_60_8_1.M (Sequence Method)
Last changed    : 9/16/2020 9:18:31 AM by SYSTEM
                  (modified after loading)
Additional Info : Peak(s) manually integrated
  
```

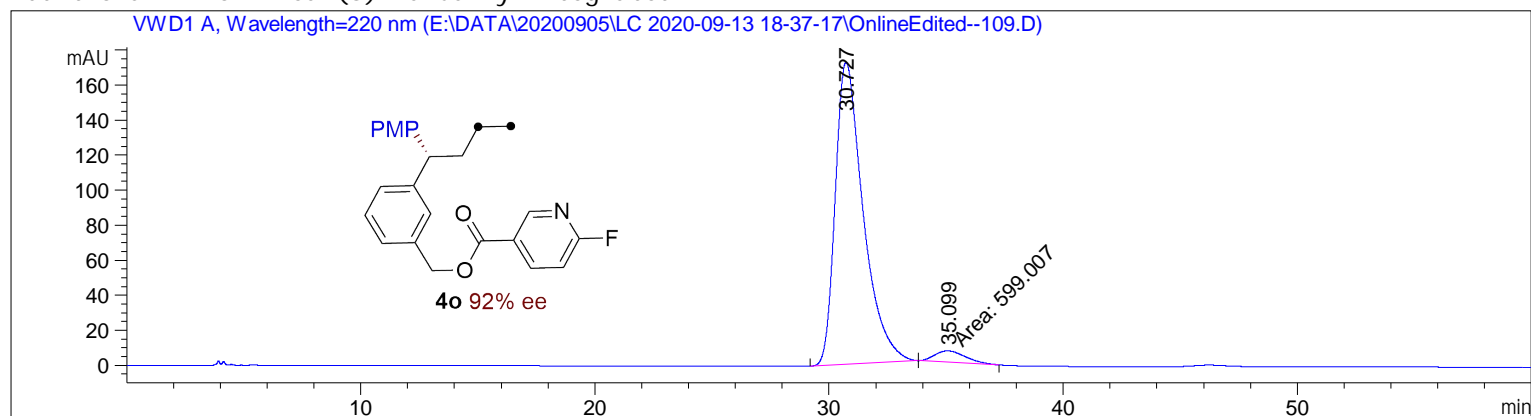

```

=====
                          Area Percent Report
=====
  
```

```

Sorted By      :      Signal
Multiplier     :      1.0000
Dilution       :      1.0000
Do not use Multiplier & Dilution Factor with ISTDs
  
```

Signal 1: VWD1 A, Wavelength=220 nm

| Peak # | RetTime [min] | Type | Width [min] | Area [mAU*s] | Height [mAU] | Area %  |
|--------|---------------|------|-------------|--------------|--------------|---------|
| 1      | 30.727        | BB   | 1.2444      | 1.42822e4    | 172.41908    | 95.9748 |
| 2      | 35.099        | MF   | 1.5299      | 599.00665    | 6.52567      | 4.0252  |

```
Totals :                      1.48812e4  178.94475
```

```

=====
*** End of Report ***
  
```

Sample Name: YH-17-154-RAC

```

=====
Acq. Operator   : SYSTEM                      Seq. Line :   23
Acq. Instrument : HPLC1260                   Location  : P1-A1
Injection Date  : 9/14/2020 3:37:20 AM      Inj       :    1
                                           Inj Volume: 3.000 µl

Different Inj Volume from Sample Entry! Actual Inj Volume : 1.000 µl
Acq. Method     : E:\DATA\20200905\LC 2020-09-13 18-37-17\201PA_25_5_1.M
Last changed    : 9/13/2020 8:42:18 PM by SYSTEM
Analysis Method : E:\DATA\20200905\LC 2020-09-13 18-37-17\201PA_25_5_1.M (Sequence Method)
Last changed    : 9/14/2020 8:52:04 AM by SYSTEM
                 (modified after loading)
Additional Info : Peak(s) manually integrated
  
```

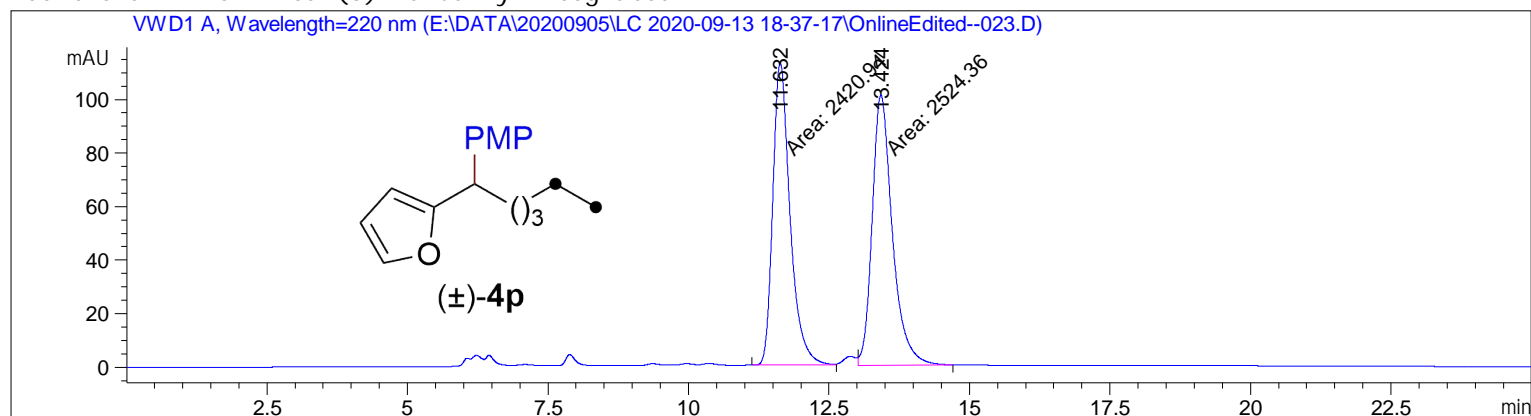

```

=====
                          Area Percent Report
=====
  
```

```

Sorted By      :      Signal
Multiplier     :      1.0000
Dilution       :      1.0000
Do not use Multiplier & Dilution Factor with ISTDs
  
```

Signal 1: VWD1 A, Wavelength=220 nm

| Peak # | RetTime [min] | Type | Width [min] | Area [mAU*s] | Height [mAU] | Area %  |
|--------|---------------|------|-------------|--------------|--------------|---------|
| 1      | 11.632        | MF   | 0.3565      | 2420.94312   | 113.18167    | 48.9544 |
| 2      | 13.424        | MM   | 0.4165      | 2524.35938   | 101.00546    | 51.0456 |

```
Totals :                      4945.30249  214.18713
```

```

=====
*** End of Report ***
  
```

Sample Name: YH-17-154-EE

```

=====
Acq. Operator   : SYSTEM                      Seq. Line :   24
Acq. Instrument : HPLC1260                   Location  : P1-A2
Injection Date  : 9/14/2020 4:03:06 AM      Inj       :    1
                                           Inj Volume: 3.000 µl

Different Inj Volume from Sample Entry! Actual Inj Volume : 1.000 µl
Acq. Method     : E:\DATA\20200905\LC 2020-09-13 18-37-17\201PA_25_5_1.M
Last changed    : 9/13/2020 8:42:18 PM by SYSTEM
Analysis Method : E:\DATA\20200905\LC 2020-09-13 18-37-17\201PA_25_5_1.M (Sequence Method)
Last changed    : 9/14/2020 8:52:04 AM by SYSTEM
                 (modified after loading)
Additional Info : Peak(s) manually integrated
  
```

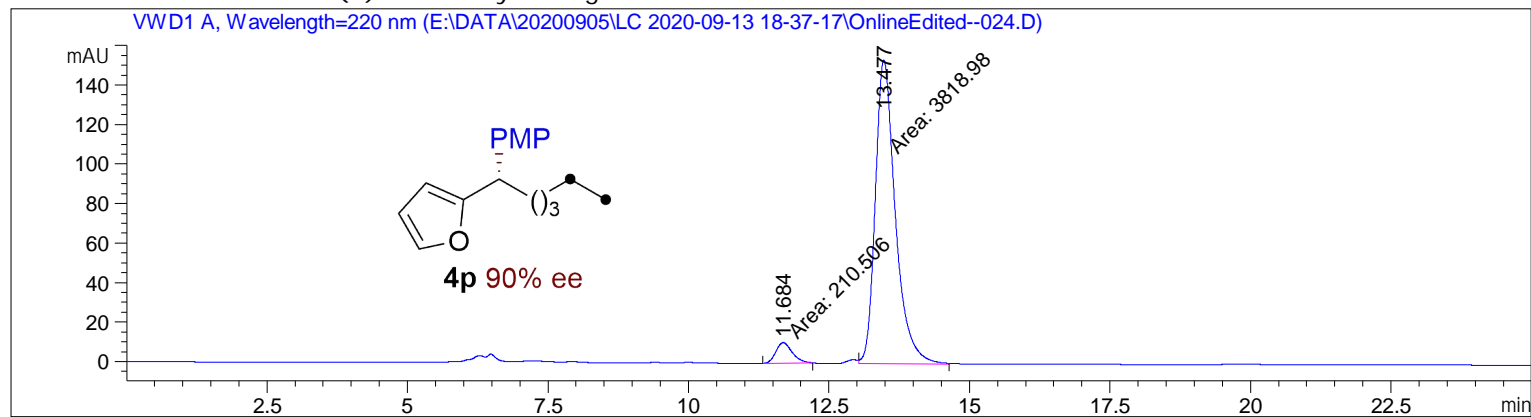

```

=====
                          Area Percent Report
=====
  
```

```

Sorted By      :      Signal
Multiplier     :      1.0000
Dilution       :      1.0000
Do not use Multiplier & Dilution Factor with ISTDs
  
```

Signal 1: VWD1 A, Wavelength=220 nm

| Peak # | RetTime [min] | Type | Width [min] | Area [mAU*s] | Height [mAU] | Area %  |
|--------|---------------|------|-------------|--------------|--------------|---------|
| 1      | 11.684        | MM   | 0.3366      | 210.50558    | 10.42404     | 5.2241  |
| 2      | 13.477        | MF   | 0.4143      | 3818.98242   | 153.64587    | 94.7759 |

```
Totals :                      4029.48801  164.06991
```

```

=====
*** End of Report ***
  
```

Sample Name: YH-17-156-RAC

```

=====
Acq. Operator   : SYSTEM                      Seq. Line :   25
Acq. Instrument : HPLC1260                  Location  : P1-A3
Injection Date  : 9/14/2020 4:28:50 AM      Inj       :    1
                                           Inj Volume: 3.000 µl
Different Inj Volume from Sample Entry! Actual Inj Volume : 1.000 µl
Acq. Method     : E:\DATA\20200905\LC 2020-09-13 18-37-17\201PA_25_5_1.M
Last changed    : 9/13/2020 8:42:18 PM by SYSTEM
Analysis Method : E:\DATA\20200905\LC 2020-09-13 18-37-17\201PA_25_5_1.M (Sequence Method)
Last changed    : 9/14/2020 8:48:48 AM by SYSTEM
                 (modified after loading)
Additional Info : Peak(s) manually integrated
  
```

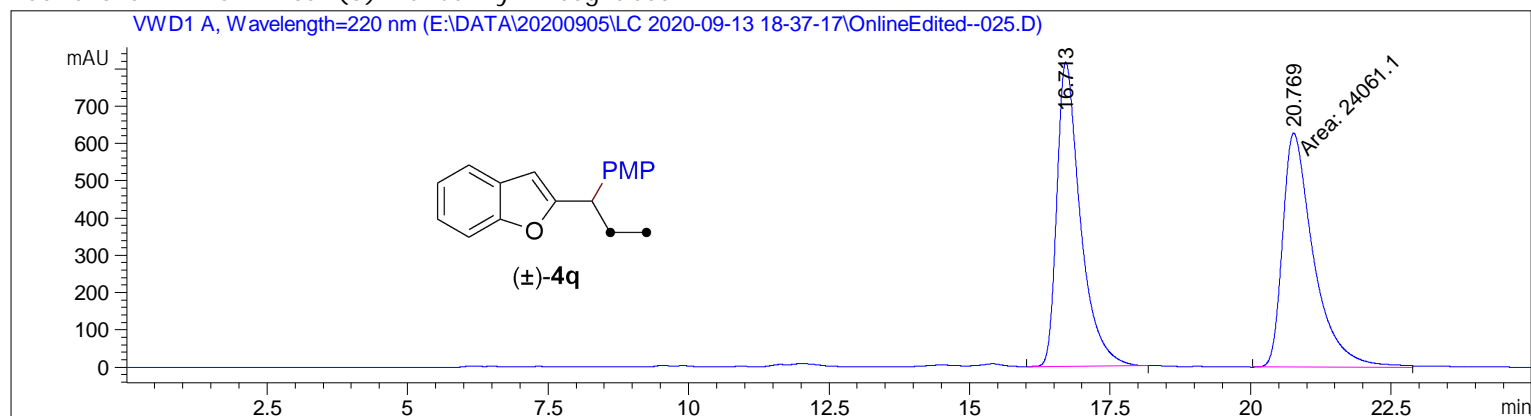

```

=====
                          Area Percent Report
=====
  
```

```

Sorted By      :      Signal
Multiplier     :      1.0000
Dilution       :      1.0000
Do not use Multiplier & Dilution Factor with ISTDs
  
```

Signal 1: VWD1 A, Wavelength=220 nm

| Peak # | RetTime [min] | Type | Width [min] | Area [mAU*s] | Height [mAU] | Area %  |
|--------|---------------|------|-------------|--------------|--------------|---------|
| 1      | 16.713        | BB   | 0.4327      | 2.37441e4    | 815.48669    | 49.6684 |
| 2      | 20.769        | MF   | 0.6390      | 2.40611e4    | 627.55438    | 50.3316 |

```
Totals :                      4.78053e4  1443.04108
```

```

=====
*** End of Report ***
  
```



Sample Name: YH-17-156-EE

```

=====
Acq. Operator   : SYSTEM                      Seq. Line :   26
Acq. Instrument : HPLC1260                   Location  : P1-A4
Injection Date  : 9/14/2020 4:54:34 AM      Inj       :    1
                                           Inj Volume: 3.000 µl
Different Inj Volume from Sample Entry! Actual Inj Volume : 1.000 µl
Acq. Method     : E:\DATA\20200905\LC 2020-09-13 18-37-17\201PA_25_5_1.M
Last changed    : 9/13/2020 8:42:18 PM by SYSTEM
Analysis Method : E:\DATA\20200905\LC 2020-09-13 18-37-17\201PA_25_5_1.M (Sequence Method)
Last changed    : 9/14/2020 8:48:48 AM by SYSTEM
                 (modified after loading)
Additional Info : Peak(s) manually integrated
  
```

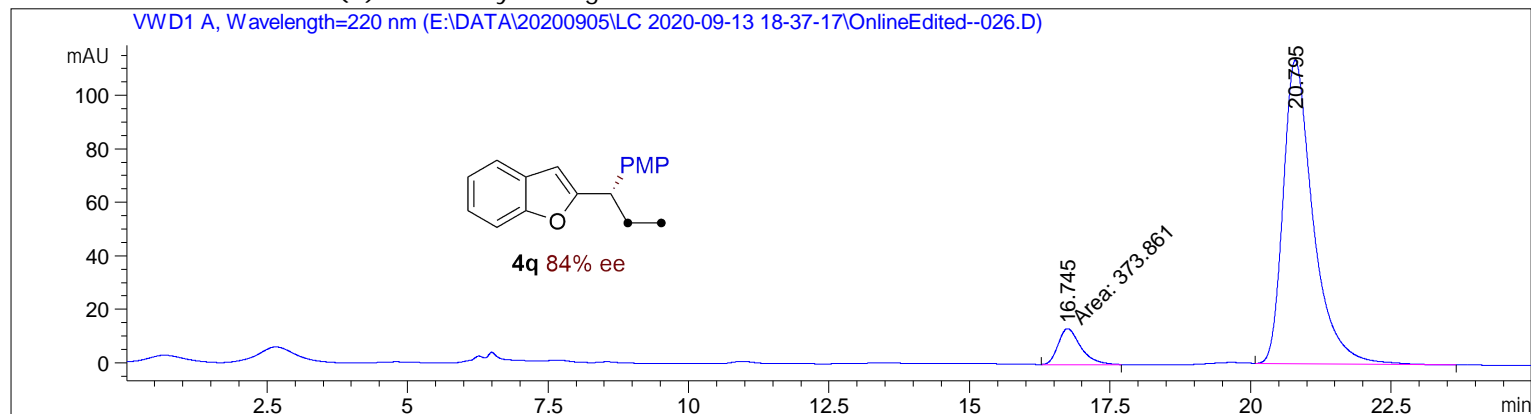

```

=====
                          Area Percent Report
=====
  
```

```

Sorted By      :      Signal
Multiplier     :      1.0000
Dilution       :      1.0000
Do not use Multiplier & Dilution Factor with ISTDs
  
```

Signal 1: VWD1 A, Wavelength=220 nm

| Peak # | RetTime [min] | Type | Width [min] | Area [mAU*s] | Height [mAU] | Area %  |
|--------|---------------|------|-------------|--------------|--------------|---------|
| 1      | 16.745        | MM   | 0.4636      | 373.86090    | 13.43970     | 8.1749  |
| 2      | 20.795        | BB   | 0.5548      | 4199.41406   | 113.45737    | 91.8251 |

```
Totals :                      4573.27496  126.89708
```

```

=====
*** End of Report ***
  
```

Sample Name: YH-17-151-RAC

```

=====
Acq. Operator   : SYSTEM                               Seq. Line :   65
Acq. Instrument : HPLC1260                             Location  : P1-B7
Injection Date  : 9/12/2020 6:10:32 PM                 Inj       :    1
                                                    Inj Volume: 3.000 µl

Different Inj Volume from Sample Entry! Actual Inj Volume : 0.100 µl
Acq. Method    : E:\DATA\20200905\LC 2020-09-11 08-36-22\301PA_25_8_1.M
Last changed   : 9/11/2020 7:15:37 PM by SYSTEM
Analysis Method: E:\DATA\20200905\LC 2020-09-11 08-36-22\301PA_25_8_1.M (Sequence Method)
Last changed   : 11/25/2021 4:57:15 PM by SYSTEM
                (modified after loading)
    
```

Additional Info : Peak(s) manually integrated

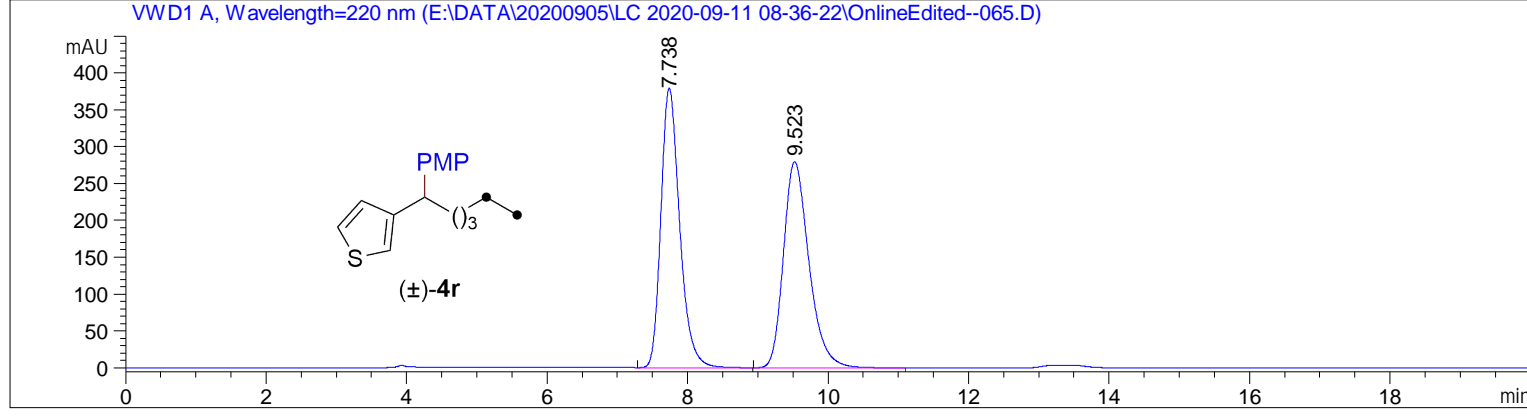

Area Percent Report

```

Sorted By      : Signal
Multiplier     : 1.0000
Dilution       : 1.0000
Do not use Multiplier & Dilution Factor with ISTDs
    
```

Signal 1: VWD1 A, Wavelength=220 nm

| Peak # | RetTime [min] | Type | Width [min] | Area [mAU*s] | Height [mAU] | Area %  |
|--------|---------------|------|-------------|--------------|--------------|---------|
| 1      | 7.738         | VB   | 0.2845      | 7035.99609   | 379.18643    | 49.9793 |
| 2      | 9.523         | BB   | 0.3858      | 7041.82764   | 279.59964    | 50.0207 |

Totals : 1.40778e4 658.78607

\*\*\* End of Report \*\*\*

Sample Name: YH-17-151-EE

```

=====
Acq. Operator   : SYSTEM                               Seq. Line :   66
Acq. Instrument : HPLC1260                             Location  : P1-B8
Injection Date  : 9/12/2020 6:36:16 PM                 Inj       :    1
                                                    Inj Volume: 3.000 µl
Different Inj Volume from Sample Entry! Actual Inj Volume : 1.000 µl
Acq. Method     : E:\DATA\20200905\LC 2020-09-11 08-36-22\301PA_25_8_1.M
Last changed    : 9/11/2020 7:15:37 PM by SYSTEM
Analysis Method : E:\DATA\20200905\LC 2020-09-11 08-36-22\301PA_25_8_1.M (Sequence Method)
Last changed    : 11/25/2021 4:58:08 PM by SYSTEM
                  (modified after loading)

```

Additional Info : Peak(s) manually integrated

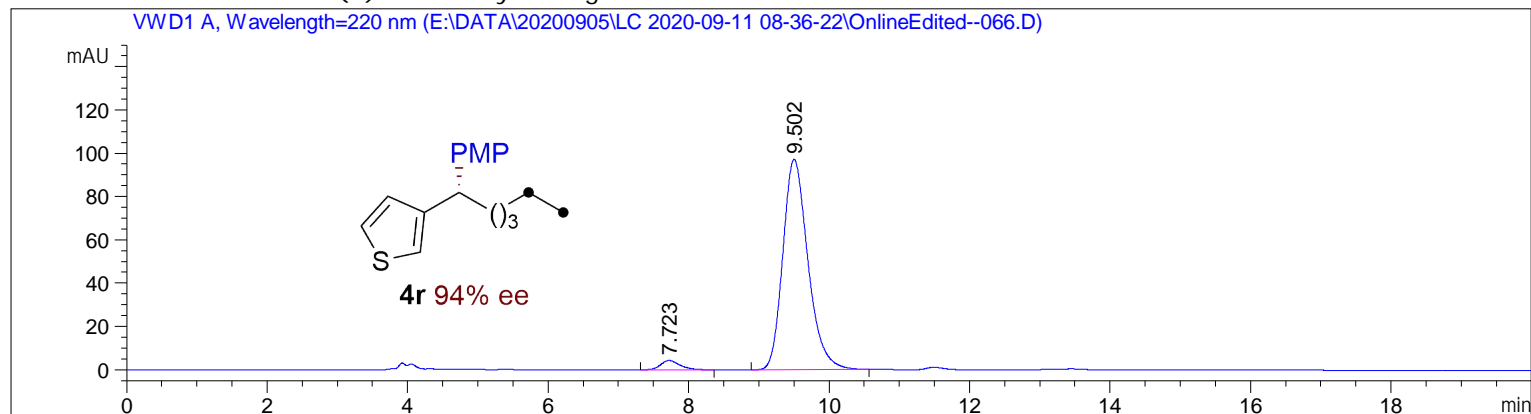

```

=====
                          Area Percent Report
=====

```

```

Sorted By      :      Signal
Multiplier     :      1.0000
Dilution       :      1.0000
Do not use Multiplier & Dilution Factor with ISTDs

```

Signal 1: VWD1 A, Wavelength=220 nm

| Peak # | RetTime [min] | Type | Width [min] | Area [mAU*s] | Height [mAU] | Area %  |
|--------|---------------|------|-------------|--------------|--------------|---------|
| 1      | 7.723         | BB   | 0.2825      | 79.95707     | 4.26963      | 3.2048  |
| 2      | 9.502         | BB   | 0.3809      | 2414.99536   | 97.17395     | 96.7952 |

```
Totals :                2494.95243  101.44358
```

```

=====
*** End of Report ***

```

Sample Name: YH-17-159-AD

```

=====
Acq. Operator   : SYSTEM                               Seq. Line :   61
Acq. Instrument : HPLC1260                             Location  : P1-B4
Injection Date  : 9/14/2020 7:56:12 PM                 Inj       :    1
                                                    Inj Volume: 3.000 µl

Different Inj Volume from Sample Entry! Actual Inj Volume : 1.000 µl
Acq. Method     : E:\DATA\20200905\LC 2020-09-13 18-37-17\10ETOH_25_10_3.M
Last changed    : 9/13/2020 8:50:01 PM by SYSTEM
Analysis Method : E:\DATA\20200905\LC 2020-09-13 18-37-17\10ETOH_25_10_3.M (Sequence Method)
Last changed    : 9/14/2020 8:35:55 PM by SYSTEM
                  (modified after loading)
    
```

Additional Info : Peak(s) manually integrated

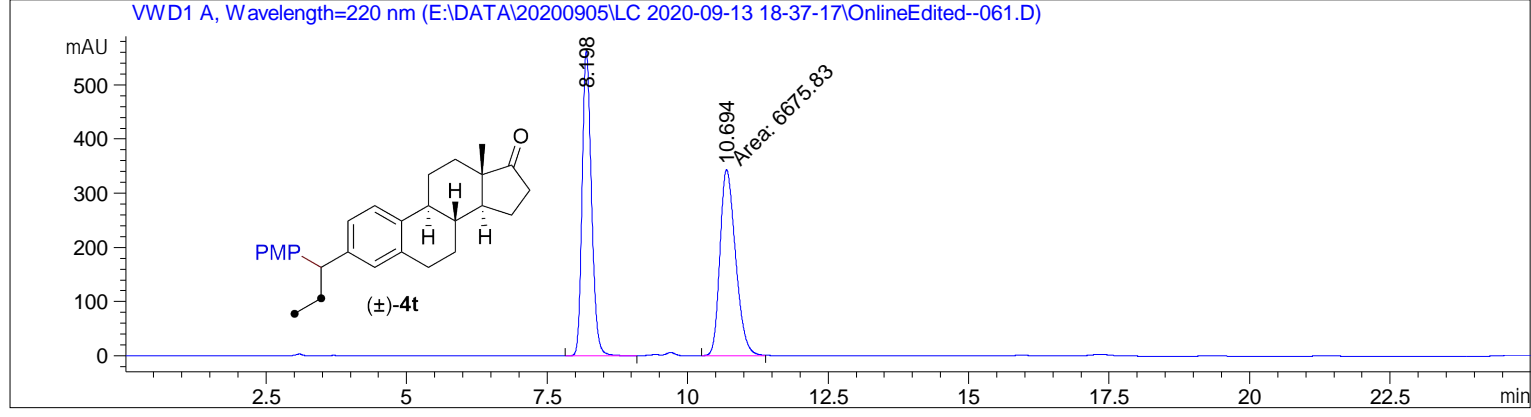

Area Percent Report

```

Sorted By      :      Signal
Multiplier     :      1.0000
Dilution       :      1.0000
Do not use Multiplier & Dilution Factor with ISTDs
    
```

Signal 1: VWD1 A, Wavelength=220 nm

| Peak # | RetTime [min] | Type | Width [min] | Area [mAU*s] | Height [mAU] | Area %  |
|--------|---------------|------|-------------|--------------|--------------|---------|
| 1      | 8.198         | BB   | 0.1780      | 6505.39844   | 562.11786    | 49.3535 |
| 2      | 10.694        | FM   | 0.3238      | 6675.82568   | 343.59470    | 50.6465 |

Totals : 1.31812e4 905.71255

\*\*\* End of Report \*\*\*

Sample Name: YH-17-159-EE

```

=====
Acq. Operator   : SYSTEM                               Seq. Line :   62
Acq. Instrument : HPLC1260                             Location  : P1-A3
Injection Date  : 9/14/2020 8:21:57 PM                 Inj       :    1
                                                    Inj Volume: 3.000 µl
    
```

```

Different Inj Volume from Sample Entry! Actual Inj Volume : 1.000 µl
Acq. Method     : E:\DATA\20200905\LC 2020-09-13 18-37-17\10ETOH_25_10_3.M
Last changed    : 9/13/2020 8:50:01 PM by SYSTEM
Analysis Method : E:\DATA\20200905\LC 2020-09-13 18-37-17\10ETOH_25_10_3.M (Sequence Method)
Last changed    : 9/14/2020 8:49:41 PM by SYSTEM
                  (modified after loading)
    
```

Additional Info : Peak(s) manually integrated

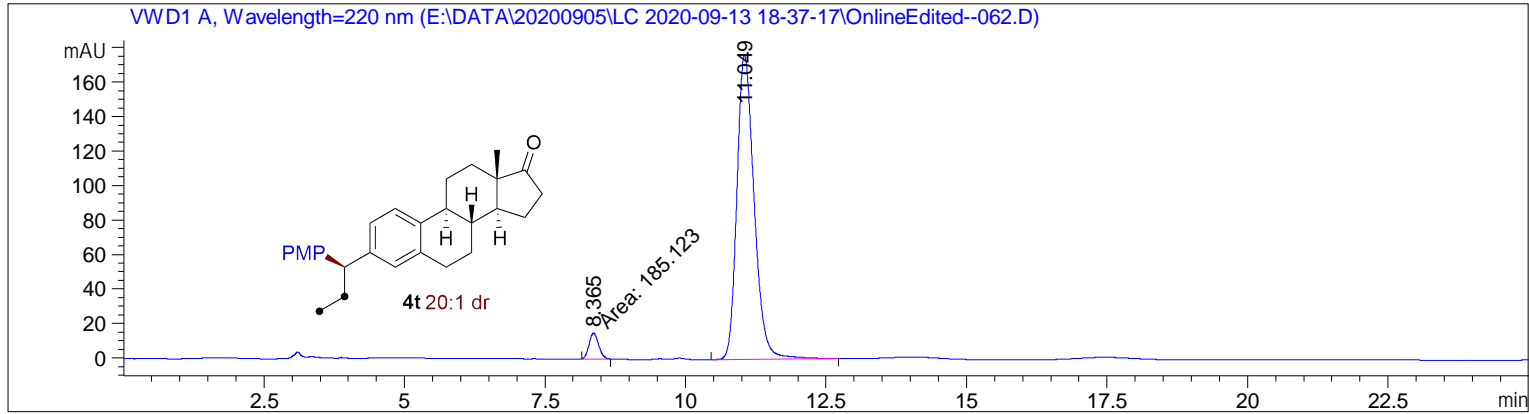

Area Percent Report

```

Sorted By      : Signal
Multiplier     : 1.0000
Dilution      : 1.0000
Do not use Multiplier & Dilution Factor with ISTDs
    
```

Signal 1: VWD1 A, Wavelength=220 nm

| Peak # | RetTime [min] | Type | Width [min] | Area [mAU*s] | Height [mAU] | Area %  |
|--------|---------------|------|-------------|--------------|--------------|---------|
| 1      | 8.365         | FM   | 0.2016      | 185.12340    | 15.30253     | 4.6858  |
| 2      | 11.049        | BB   | 0.3282      | 3765.57959   | 176.31880    | 95.3142 |

Totals : 3950.70299 191.62134

\*\*\* End of Report \*\*\*

Sample Name: YH-17-127-RAC

```

=====
Acq. Operator   : SYSTEM                               Seq. Line :   26
Acq. Instrument : HPLC1260                             Location  : P1-A1
Injection Date  : 9/6/2020 12:37:13 AM                 Inj       :    1
                                                    Inj Volume: 3.000 µl
Different Inj Volume from Sample Entry! Actual Inj Volume : 1.000 µl
Acq. Method     : E:\DATA\20200905\LC 2020-09-05 14-35-09\1ET0H_60_5_3.M
Last changed    : 9/5/2020 7:29:37 PM by SYSTEM
Analysis Method : E:\DATA\20200905\LC 2020-09-05 14-35-09\1ET0H_60_5_3.M (Sequence Method)
Last changed    : 9/6/2020 12:19:17 PM by SYSTEM
                  (modified after loading)
Additional Info : Peak(s) manually integrated
  
```

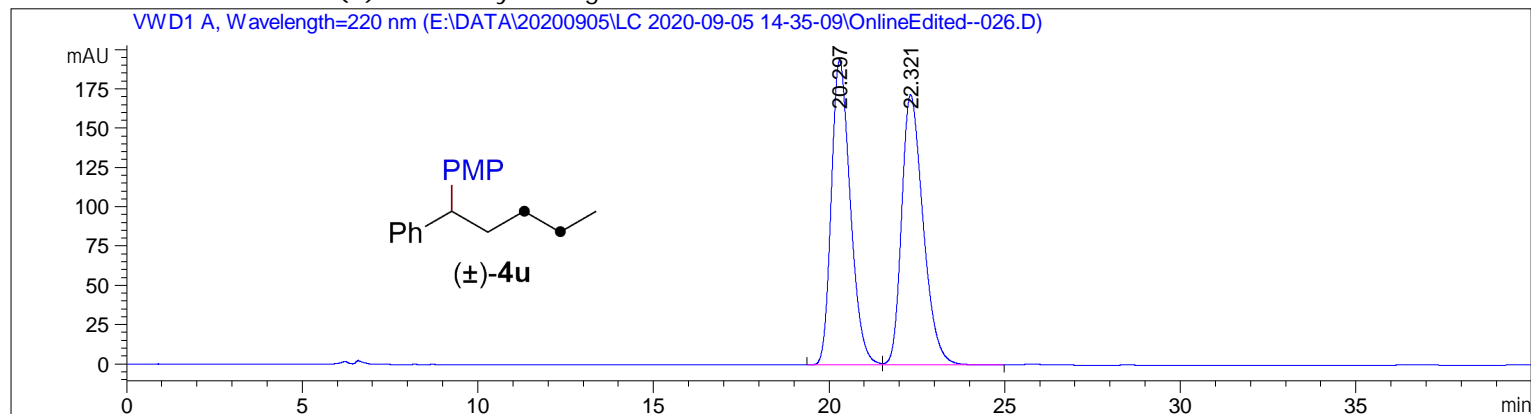

```

=====
                          Area Percent Report
=====
  
```

```

Sorted By      :      Signal
Multiplier     :      1.0000
Dilution       :      1.0000
Do not use Multiplier & Dilution Factor with ISTDs
  
```

Signal 1: VWD1 A, Wavelength=220 nm

| Peak # | RetTime [min] | Type | Width [min] | Area [mAU*s] | Height [mAU] | Area %  |
|--------|---------------|------|-------------|--------------|--------------|---------|
| 1      | 20.297        | BV   | 0.5805      | 7305.88867   | 193.95717    | 49.9074 |
| 2      | 22.321        | VB   | 0.6543      | 7332.99609   | 172.01820    | 50.0926 |

```
Totals :                      1.46389e4  365.97537
```

```

=====
*** End of Report ***
  
```

Sample Name: YH-17-127-EE

```

=====
Acq. Operator   : SYSTEM                               Seq. Line :   27
Acq. Instrument : HPLC1260                           Location  : P1-A2
Injection Date  : 9/6/2020 1:37:58 AM                 Inj       :    1
                                                    Inj Volume: 3.000 µl
Different Inj Volume from Sample Entry! Actual Inj Volume : 1.000 µl
Acq. Method     : E:\DATA\20200905\LC 2020-09-05 14-35-09\1ET0H_60_5_3.M
Last changed    : 9/5/2020 7:29:37 PM by SYSTEM
Analysis Method : E:\DATA\20200905\LC 2020-09-05 14-35-09\1ET0H_60_5_3.M (Sequence Method)
Last changed    : 9/6/2020 12:19:17 PM by SYSTEM
                  (modified after loading)
Additional Info : Peak(s) manually integrated
  
```

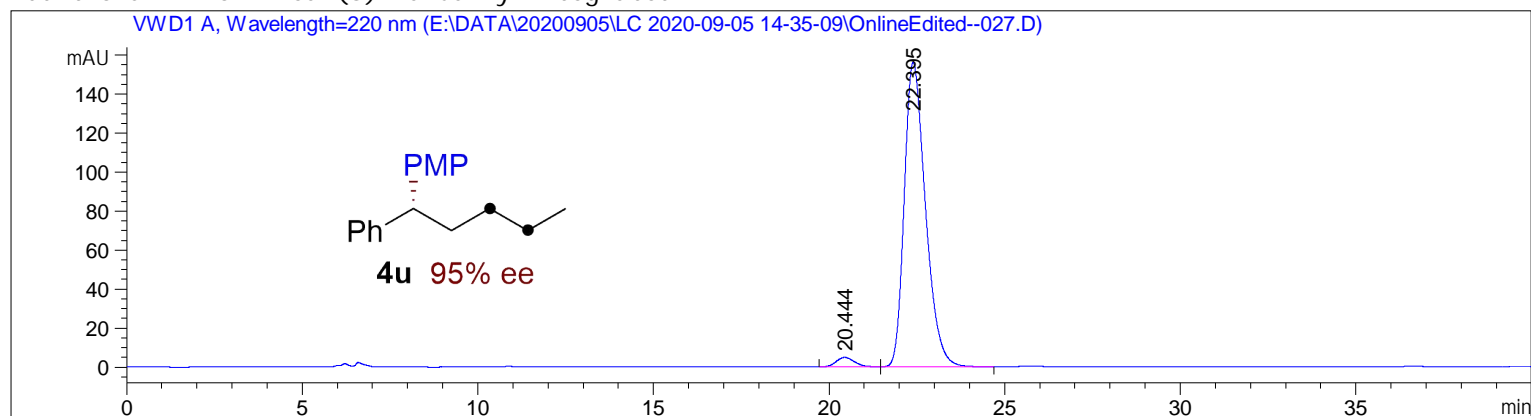

```

=====
                          Area Percent Report
=====
  
```

```

Sorted By      :      Signal
Multiplier     :      1.0000
Dilution       :      1.0000
Do not use Multiplier & Dilution Factor with ISTDs
  
```

Signal 1: VWD1 A, Wavelength=220 nm

| Peak # | RetTime [min] | Type | Width [min] | Area [mAU*s] | Height [mAU] | Area %  |
|--------|---------------|------|-------------|--------------|--------------|---------|
| 1      | 20.444        | BB   | 0.5498      | 174.51820    | 4.85016      | 2.5958  |
| 2      | 22.395        | BB   | 0.6443      | 6548.65283   | 156.13647    | 97.4042 |

```
Totals :                      6723.17104  160.98663
```

```

=====
*** End of Report ***
  
```

Sample Name: YH-17-129-RAC

```

=====
Acq. Operator   : SYSTEM                      Seq. Line :   42
Acq. Instrument : HPLC1260                   Location  : P1-A3
Injection Date  : 9/7/2020 11:47:35 AM      Inj       :    1
                                           Inj Volume: 3.000 µl
Different Inj Volume from Sample Entry! Actual Inj Volume : 1.000 µl
Acq. Method     : E:\DATA\20200905\LC 2020-09-06 15-18-12\1ET0H_60_5_3.M
Last changed    : 9/7/2020 10:03:52 AM by SYSTEM
Analysis Method : E:\DATA\20200905\LC 2020-09-06 15-18-12\1ET0H_60_5_3.M (Sequence Method)
Last changed    : 9/7/2020 1:51:58 PM by SYSTEM
                 (modified after loading)
=====

```

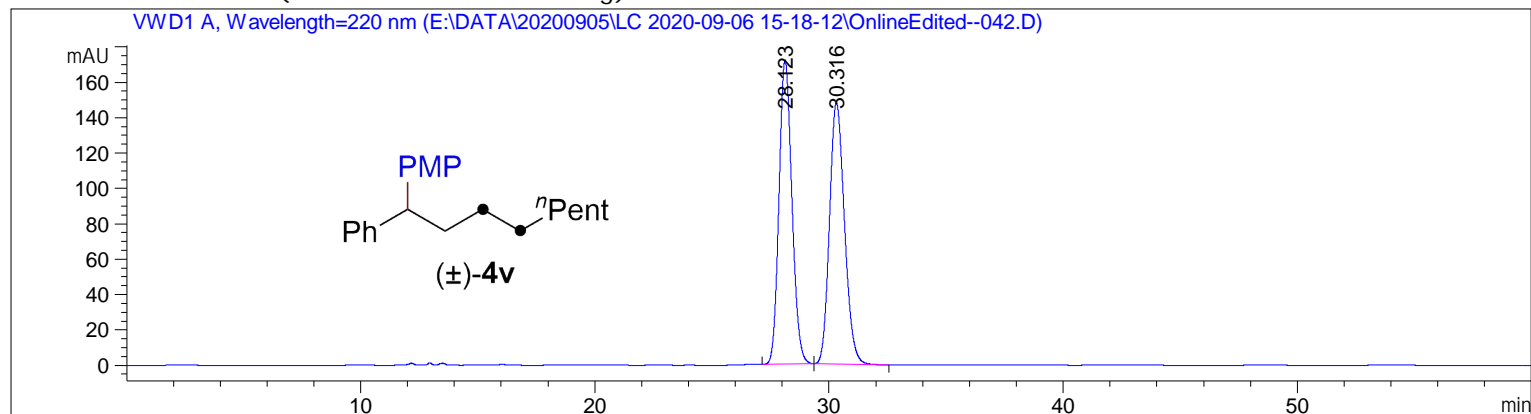

```

=====
                          Area Percent Report
=====

```

```

Sorted By      :      Signal
Multiplier     :      1.0000
Dilution       :      1.0000
Do not use Multiplier & Dilution Factor with ISTDs

```

Signal 1: VWD1 A, Wavelength=220 nm

| Peak # | RetTime [min] | Type | Width [min] | Area [mAU*s] | Height [mAU] | Area %  |
|--------|---------------|------|-------------|--------------|--------------|---------|
| 1      | 28.123        | BB   | 0.5939      | 6577.11133   | 171.68488    | 49.9985 |
| 2      | 30.316        | BB   | 0.6894      | 6577.51123   | 147.74504    | 50.0015 |

```
Totals :                      1.31546e4  319.42992
```

```

=====
*** End of Report ***
=====

```



Sample Name: YH-17-129-EE

```

=====
Acq. Operator   : SYSTEM                      Seq. Line :   43
Acq. Instrument : HPLC1260                   Location  : P1-A4
Injection Date  : 9/7/2020 12:48:19 PM       Inj       :    1
                                           Inj Volume: 3.000 µl
Different Inj Volume from Sample Entry! Actual Inj Volume : 1.000 µl
Acq. Method     : E:\DATA\20200905\LC 2020-09-06 15-18-12\1ETOH_60_5_3.M
Last changed    : 9/7/2020 10:03:52 AM by SYSTEM
Analysis Method : E:\DATA\20200905\LC 2020-09-06 15-18-12\1ETOH_60_5_3.M (Sequence Method)
Last changed    : 9/7/2020 1:51:58 PM by SYSTEM
                 (modified after loading)
Additional Info : Peak(s) manually integrated
  
```

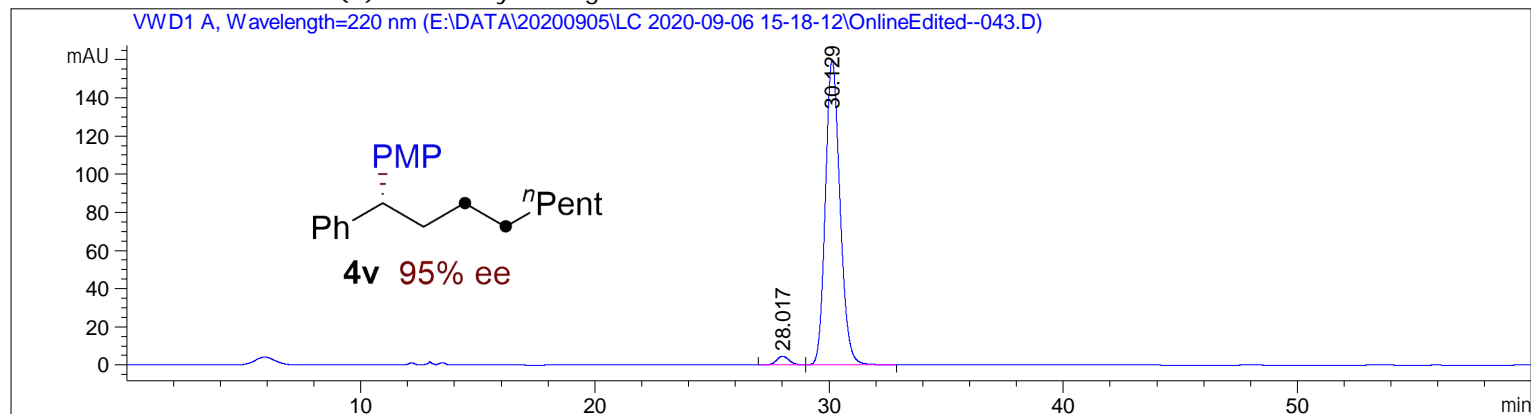

```

=====
                          Area Percent Report
=====
  
```

```

Sorted By      :      Signal
Multiplier     :      1.0000
Dilution       :      1.0000
Do not use Multiplier & Dilution Factor with ISTDs
  
```

Signal 1: VWD1 A, Wavelength=220 nm

| Peak # | RetTime [min] | Type | Width [min] | Area [mAU*s] | Height [mAU] | Area %  |
|--------|---------------|------|-------------|--------------|--------------|---------|
| 1      | 28.017        | BB   | 0.5799      | 171.90323    | 4.55951      | 2.4223  |
| 2      | 30.129        | BB   | 0.6701      | 6924.69043   | 159.64058    | 97.5777 |

```
Totals :                      7096.59366  164.20009
```

```

=====
*** End of Report ***
  
```

Sample Name: YH-17-128-RAC

```

=====
Acq. Operator   : SYSTEM                      Seq. Line :   40
Acq. Instrument : HPLC1260                   Location  : P1-A1
Injection Date  : 9/7/2020 9:46:04 AM        Inj       :    1
                                           Inj Volume: 3.000 µl
Different Inj Volume from Sample Entry! Actual Inj Volume : 1.000 µl
Acq. Method     : E:\DATA\20200905\LC 2020-09-06 15-18-12\1ETOH_60_5_3.M
Last changed    : 9/7/2020 10:03:52 AM by SYSTEM
                 (modified after loading)
Analysis Method : E:\DATA\20200905\LC 2020-09-06 15-18-12\1ETOH_60_5_3.M (Sequence Method)
Last changed    : 9/7/2020 1:51:58 PM by SYSTEM
                 (modified after loading)
=====

```

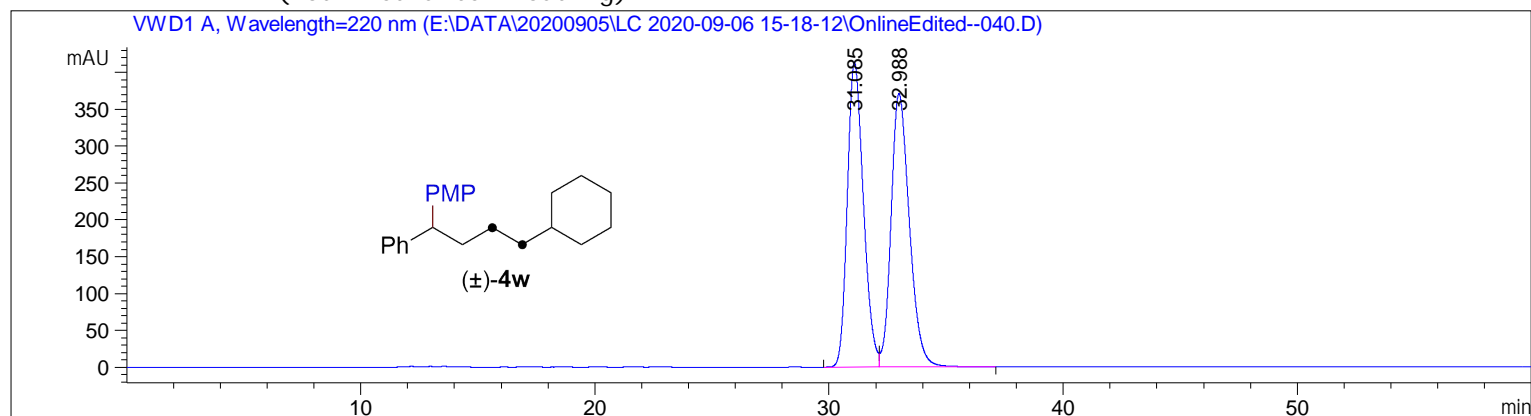

```

=====
                          Area Percent Report
=====

```

```

Sorted By      :      Signal
Multiplier     :      1.0000
Dilution       :      1.0000
Do not use Multiplier & Dilution Factor with ISTDs

```

Signal 1: VWD1 A, Wavelength=220 nm

| Peak # | RetTime [min] | Type | Width [min] | Area [mAU*s] | Height [mAU] | Area %  |
|--------|---------------|------|-------------|--------------|--------------|---------|
| 1      | 31.085        | BV   | 0.7392      | 1.97897e4    | 413.64362    | 49.5118 |
| 2      | 32.988        | VB   | 0.8355      | 2.01799e4    | 371.04105    | 50.4882 |

```
Totals :                      3.99696e4  784.68466
```

```

=====
*** End of Report ***
=====

```

Sample Name: YH-17-128-EE

```

=====
Acq. Operator   : SYSTEM                      Seq. Line :   41
Acq. Instrument : HPLC1260                   Location  : P1-A2
Injection Date  : 9/7/2020 10:46:50 AM      Inj       :    1
                                           Inj Volume: 3.000 µl
Different Inj Volume from Sample Entry! Actual Inj Volume : 1.000 µl
Acq. Method     : E:\DATA\20200905\LC 2020-09-06 15-18-12\1ETOH_60_5_3.M
Last changed    : 9/7/2020 10:03:52 AM by SYSTEM
Analysis Method : E:\DATA\20200905\LC 2020-09-06 15-18-12\1ETOH_60_5_3.M (Sequence Method)
Last changed    : 9/7/2020 1:51:58 PM by SYSTEM
                 (modified after loading)
Additional Info : Peak(s) manually integrated
  
```

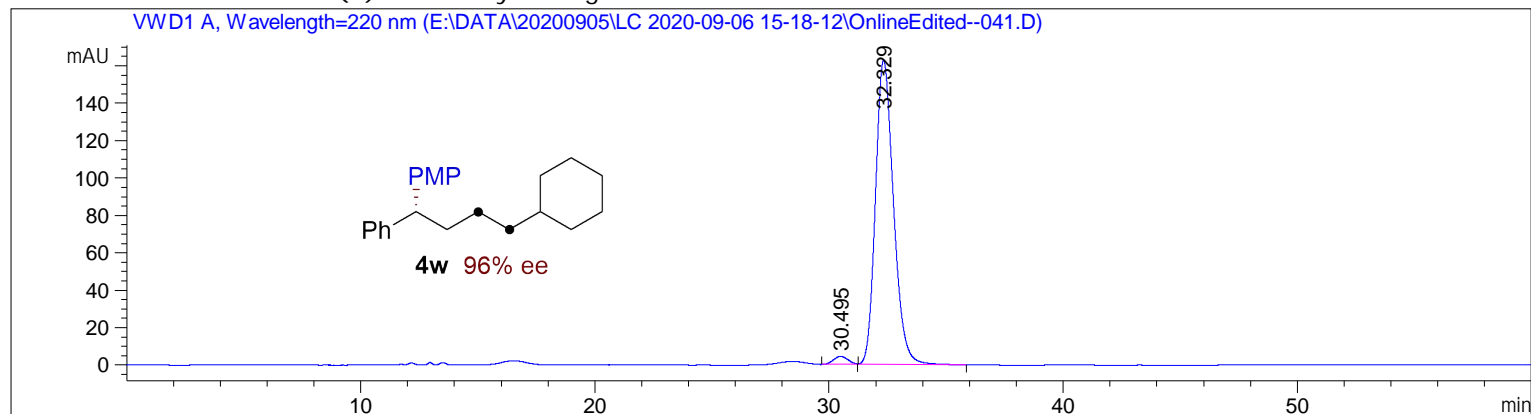

```

=====
                          Area Percent Report
=====
  
```

```

Sorted By      :      Signal
Multiplier     :      1.0000
Dilution       :      1.0000
Do not use Multiplier & Dilution Factor with ISTDs
  
```

Signal 1: VWD1 A, Wavelength=220 nm

| Peak # | RetTime [min] | Type | Width [min] | Area [mAU*s] | Height [mAU] | Area %  |
|--------|---------------|------|-------------|--------------|--------------|---------|
| 1      | 30.495        | BB   | 0.6426      | 172.03056    | 4.15022      | 1.9424  |
| 2      | 32.329        | BB   | 0.8267      | 8684.74316   | 162.44980    | 98.0576 |

```
Totals :                      8856.77373  166.60002
```

```

=====
*** End of Report ***
  
```

Sample Name: YH-17-148-EE

```

=====
Acq. Operator   : SYSTEM                      Seq. Line :   69
Acq. Instrument : HPLC1260                   Location  : P1-B4
Injection Date  : 9/12/2020 8:23:31 PM      Inj       :    1
                                           Inj Volume: 3.000 µl
Different Inj Volume from Sample Entry! Actual Inj Volume : 1.000 µl
Acq. Method    : E:\DATA\20200905\LC 2020-09-11 08-36-22\51PA_40_8_2.M
Last changed   : 9/11/2020 3:58:07 PM by SYSTEM
Analysis Method: E:\DATA\20200905\LC 2020-09-11 08-36-22\51PA_40_8_2.M (Sequence Method)
Last changed   : 9/12/2020 9:54:34 PM by SYSTEM
                (modified after loading)
Additional Info : Peak(s) manually integrated
  
```

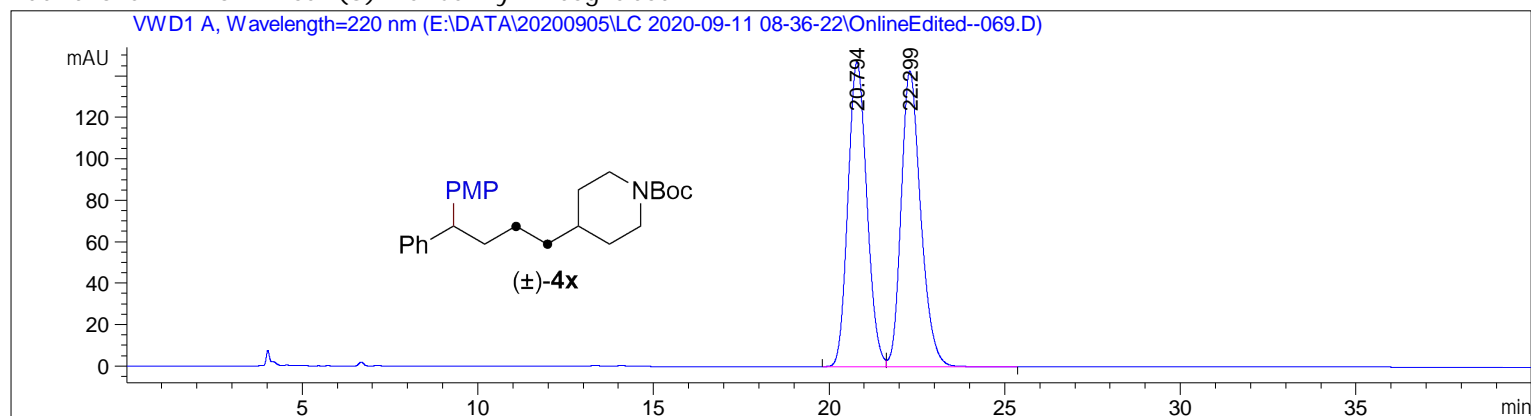

```

=====
                          Area Percent Report
=====
  
```

```

Sorted By      :      Signal
Multiplier     :      1.0000
Dilution       :      1.0000
Do not use Multiplier & Dilution Factor with ISTDs
  
```

Signal 1: VWD1 A, Wavelength=220 nm

| Peak # | RetTime [min] | Type | Width [min] | Area [mAU*s] | Height [mAU] | Area %  |
|--------|---------------|------|-------------|--------------|--------------|---------|
| 1      | 20.794        | BV   | 0.5852      | 5505.28906   | 146.92302    | 49.8768 |
| 2      | 22.299        | VB   | 0.5918      | 5532.49512   | 142.85559    | 50.1232 |

```
Totals :                      1.10378e4  289.77861
```

```

=====
*** End of Report ***
  
```

Sample Name: YH-17-148-RAC

```

=====
Acq. Operator   : SYSTEM                               Seq. Line :   68
Acq. Instrument : HPLC1260                             Location  : P1-B3
Injection Date  : 9/12/2020 7:42:47 PM                 Inj       :    1
                                                    Inj Volume: 3.000 µl
Different Inj Volume from Sample Entry! Actual Inj Volume : 1.000 µl
Acq. Method     : E:\DATA\20200905\LC 2020-09-11 08-36-22\51PA_40_8_2.M
Last changed    : 9/11/2020 3:58:07 PM by SYSTEM
Analysis Method : E:\DATA\20200905\LC 2020-09-11 08-36-22\51PA_40_8_2.M (Sequence Method)
Last changed    : 9/12/2020 9:54:34 PM by SYSTEM
                  (modified after loading)
Additional Info : Peak(s) manually integrated

```

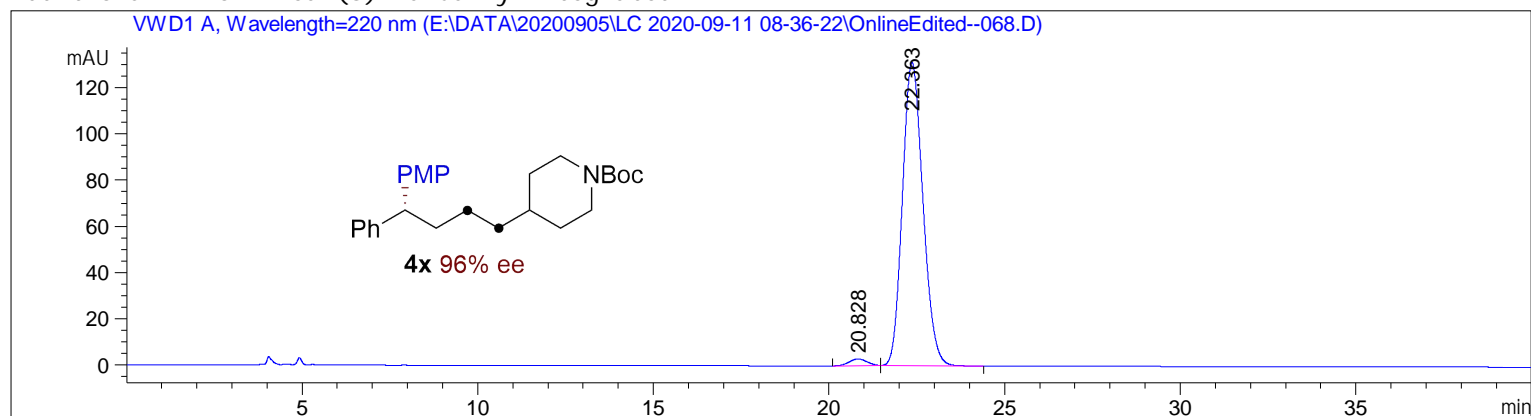

```

=====
                          Area Percent Report
=====

```

```

Sorted By      :      Signal
Multiplier     :      1.0000
Dilution       :      1.0000
Do not use Multiplier & Dilution Factor with ISTDs

```

Signal 1: VWD1 A, Wavelength=220 nm

| Peak # | RetTime [min] | Type | Width [min] | Area [mAU*s] | Height [mAU] | Area %  |
|--------|---------------|------|-------------|--------------|--------------|---------|
| 1      | 20.828        | BB   | 0.5403      | 100.21465    | 2.86358      | 1.8463  |
| 2      | 22.363        | BB   | 0.6315      | 5327.57861   | 131.53824    | 98.1537 |

```
Totals :                      5427.79326  134.40182
```

```

=====
*** End of Report ***

```

Sample Name: YH-17-147-RAC

```

=====
Acq. Operator   : SYSTEM                      Seq. Line :   34
Acq. Instrument : HPLC1260                   Location  : P1-B1
Injection Date  : 9/11/2020 11:12:14 PM      Inj       :    5
                                           Inj Volume: 3.000 µl
Different Inj Volume from Sample Entry! Actual Inj Volume : 1.000 µl
Acq. Method     : E:\DATA\20200905\LC 2020-09-11 08-36-22\11PA_40_5_1.M
Last changed    : 9/11/2020 11:12:05 PM by SYSTEM
                 (modified after loading)
Analysis Method : E:\DATA\20200905\LC 2020-09-11 08-36-22\11PA_40_5_1.M (Sequence Method)
Last changed    : 9/12/2020 9:39:00 AM by SYSTEM
                 (modified after loading)
Additional Info  : Peak(s) manually integrated
=====

```

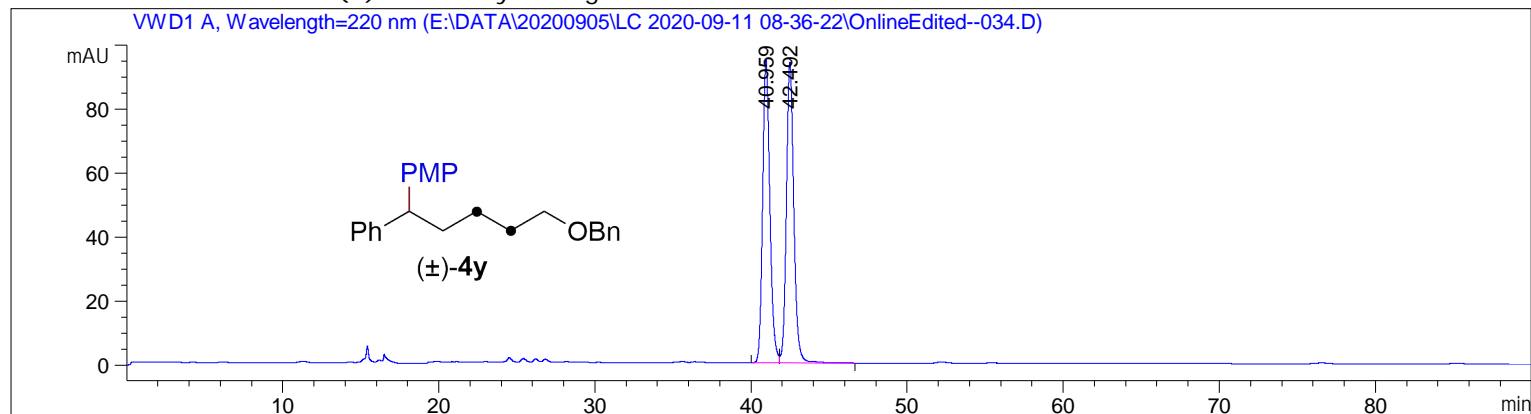

```

=====
                          Area Percent Report
=====

```

```

Sorted By      :      Signal
Multiplier     :      1.0000
Dilution      :      1.0000
Do not use Multiplier & Dilution Factor with ISTDs

```

Signal 1: VWD1 A, Wavelength=220 nm

| Peak # | RetTime [min] | Type | Width [min] | Area [mAU*s] | Height [mAU] | Area %  |
|--------|---------------|------|-------------|--------------|--------------|---------|
| 1      | 40.959        | BV   | 0.4954      | 3048.32300   | 94.47705     | 49.6760 |
| 2      | 42.492        | VB   | 0.5020      | 3088.08325   | 93.81505     | 50.3240 |

```
Totals :                      6136.40625  188.29210
```

```

=====
*** End of Report ***
=====

```

Sample Name: YH-17-147-EE

```

=====
Acq. Operator   : SYSTEM                      Seq. Line :   35
Acq. Instrument : HPLC1260                   Location  : P1-B2
Injection Date  : 9/12/2020 12:43:00 AM      Inj       :    1
                                           Inj Volume: 3.000 µl
Different Inj Volume from Sample Entry! Actual Inj Volume : 2.000 µl
Acq. Method     : E:\DATA\20200905\LC 2020-09-11 08-36-22\11PA_40_5_1.M
Last changed    : 9/11/2020 11:12:05 PM by SYSTEM
Analysis Method : E:\DATA\20200905\LC 2020-09-11 08-36-22\11PA_40_5_1.M (Sequence Method)
Last changed    : 9/12/2020 9:39:00 AM by SYSTEM
                 (modified after loading)
Additional Info : Peak(s) manually integrated
  
```

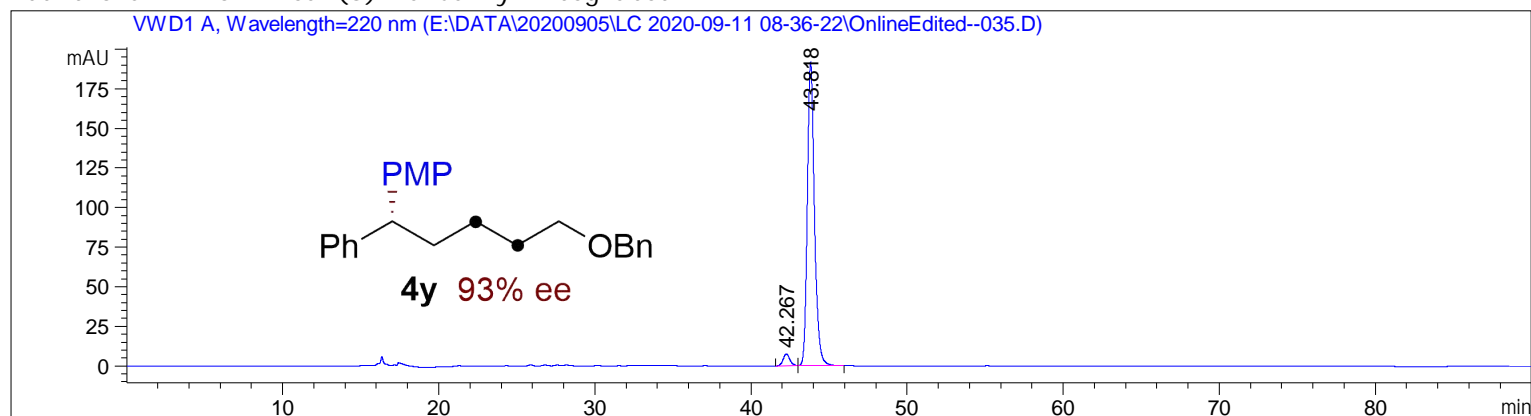

```

=====
                          Area Percent Report
=====
  
```

```

Sorted By      :      Signal
Multiplier     :      1.0000
Dilution      :      1.0000
Do not use Multiplier & Dilution Factor with ISTDs
  
```

Signal 1: VWD1 A, Wavelength=220 nm

| Peak # | RetTime [min] | Type | Width [min] | Area [mAU*s] | Height [mAU] | Area %  |
|--------|---------------|------|-------------|--------------|--------------|---------|
| 1      | 42.267        | BB   | 0.4521      | 217.21002    | 7.42821      | 3.4565  |
| 2      | 43.818        | BB   | 0.4847      | 6066.84277   | 191.43550    | 96.5435 |

```
Totals :                      6284.05280  198.86371
```

```

=====
*** End of Report ***
  
```

Sample Name: YH-17-150-RAC

```

=====
Acq. Operator   : SYSTEM                               Seq. Line :   62
Acq. Instrument : HPLC1260                             Location  :   P1-B5
Injection Date  : 9/12/2020 5:03:14 PM                 Inj       :    1
                                                    Inj Volume: 3.000 µl

Different Inj Volume from Sample Entry! Actual Inj Volume : 1.000 µl
Acq. Method     : E:\DATA\20200905\LC 2020-09-11 08-36-22\101PA_20_8_4.M
Last changed    : 9/11/2020 8:14:55 PM by SYSTEM
Analysis Method : E:\DATA\20200905\LC 2020-09-11 08-36-22\101PA_20_8_4.M (Sequence Method)
Last changed    : 9/12/2020 9:52:06 PM by SYSTEM
                (modified after loading)
Additional Info : Peak(s) manually integrated
  
```

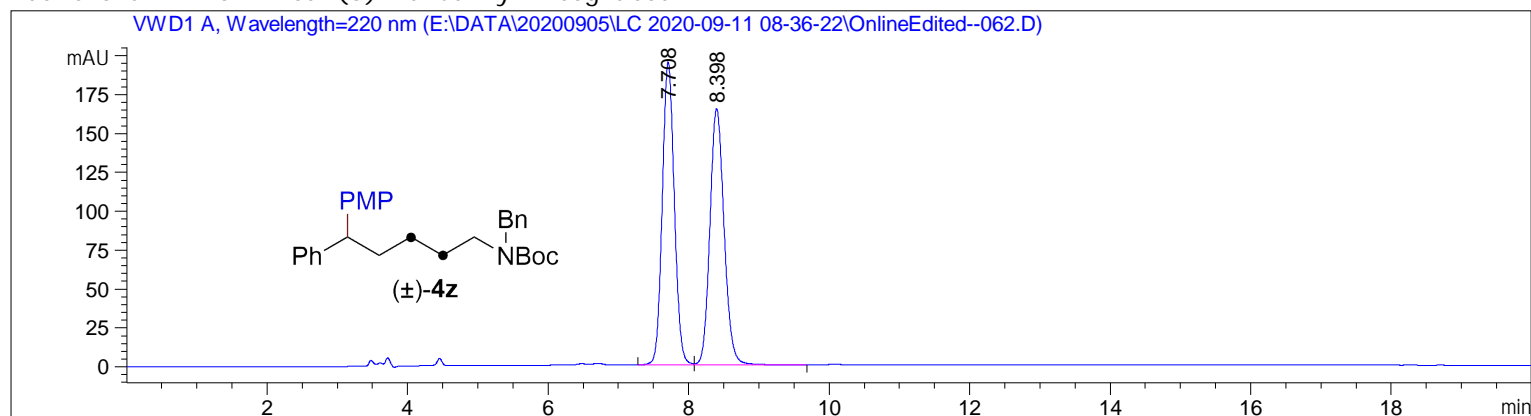

```

=====
                          Area Percent Report
=====
  
```

```

Sorted By      :      Signal
Multiplier     :      1.0000
Dilution       :      1.0000
Do not use Multiplier & Dilution Factor with ISTDs
  
```

Signal 1: VWD1 A, Wavelength=220 nm

| Peak # | RetTime [min] | Type | Width [min] | Area [mAU*s] | Height [mAU] | Area %  |
|--------|---------------|------|-------------|--------------|--------------|---------|
| 1      | 7.708         | BV   | 0.1850      | 2317.88989   | 194.59912    | 50.0108 |
| 2      | 8.398         | VB   | 0.2180      | 2316.88647   | 164.78603    | 49.9892 |

```
Totals :                      4634.77637  359.38515
```

```

=====
*** End of Report ***
  
```



Sample Name: YH-17-150-EE

```

=====
Acq. Operator   : SYSTEM                               Seq. Line :   63
Acq. Instrument : HPLC1260                             Location  : P1-B6
Injection Date  : 9/12/2020 5:24:00 PM                 Inj       :    1
                                                    Inj Volume: 3.000 µl
Different Inj Volume from Sample Entry! Actual Inj Volume : 2.000 µl
Acq. Method     : E:\DATA\20200905\LC 2020-09-11 08-36-22\101PA_20_8_4.M
Last changed    : 9/11/2020 8:14:55 PM by SYSTEM
Analysis Method : E:\DATA\20200905\LC 2020-09-11 08-36-22\101PA_20_8_4.M (Sequence Method)
Last changed    : 9/12/2020 9:52:06 PM by SYSTEM
                  (modified after loading)
Additional Info : Peak(s) manually integrated

```

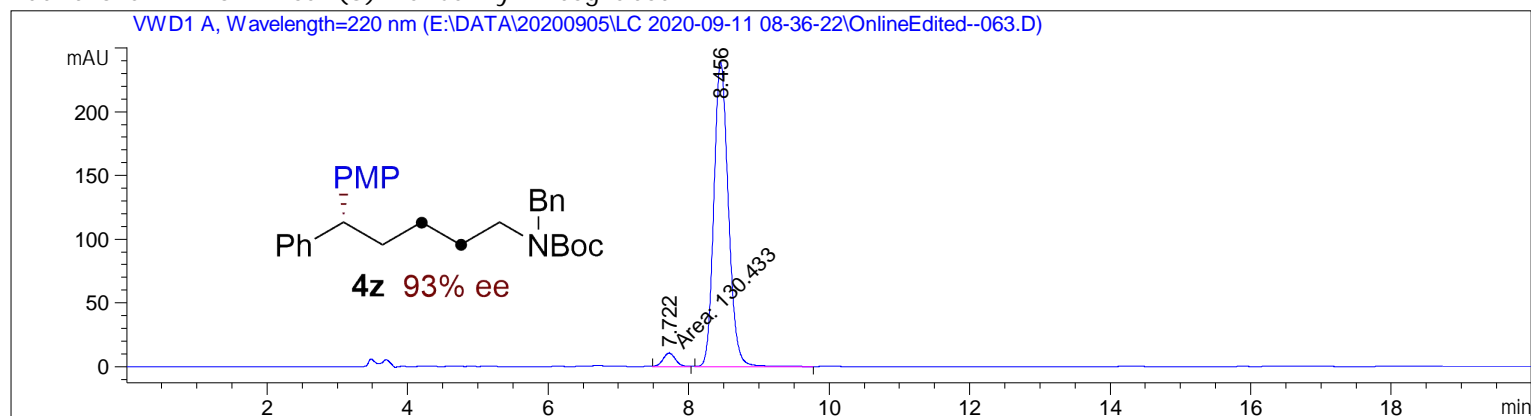

```

=====
                          Area Percent Report
=====

```

```

Sorted By      :      Signal
Multiplier     :      1.0000
Dilution       :      1.0000
Do not use Multiplier & Dilution Factor with ISTDs

```

Signal 1: VWD1 A, Wavelength=220 nm

| Peak # | RetTime [min] | Type | Width [min] | Area [mAU*s] | Height [mAU] | Area %  |
|--------|---------------|------|-------------|--------------|--------------|---------|
| 1      | 7.722         | FM   | 0.2043      | 130.43301    | 10.64253     | 3.6710  |
| 2      | 8.456         | VB   | 0.2212      | 3422.60986   | 238.79257    | 96.3290 |

```
Totals :                      3553.04288  249.43510
```

```

=====
*** End of Report ***

```

Sample Name: YH-17-170-RAC

```

=====
Acq. Operator   : SYSTEM                               Seq. Line : 111
Acq. Instrument : HPLC1260                           Location  : P1-C3
Injection Date  : 9/16/2020 2:59:49 AM                Inj       : 1
                                                    Inj Volume: 3.000 µl
Different Inj Volume from Sample Entry! Actual Inj Volume : 0.100 µl
Acq. Method     : E:\DATA\20200905\LC 2020-09-13 18-37-17\1EtOH_50_5_1.M
Last changed    : 9/15/2020 3:46:59 PM by SYSTEM
Analysis Method : E:\DATA\20200905\LC 2020-09-13 18-37-17\1EtOH_50_5_1.M (Sequence Method)
Last changed    : 9/16/2020 9:20:20 AM by SYSTEM
                  (modified after loading)
Additional Info : Peak(s) manually integrated
  
```

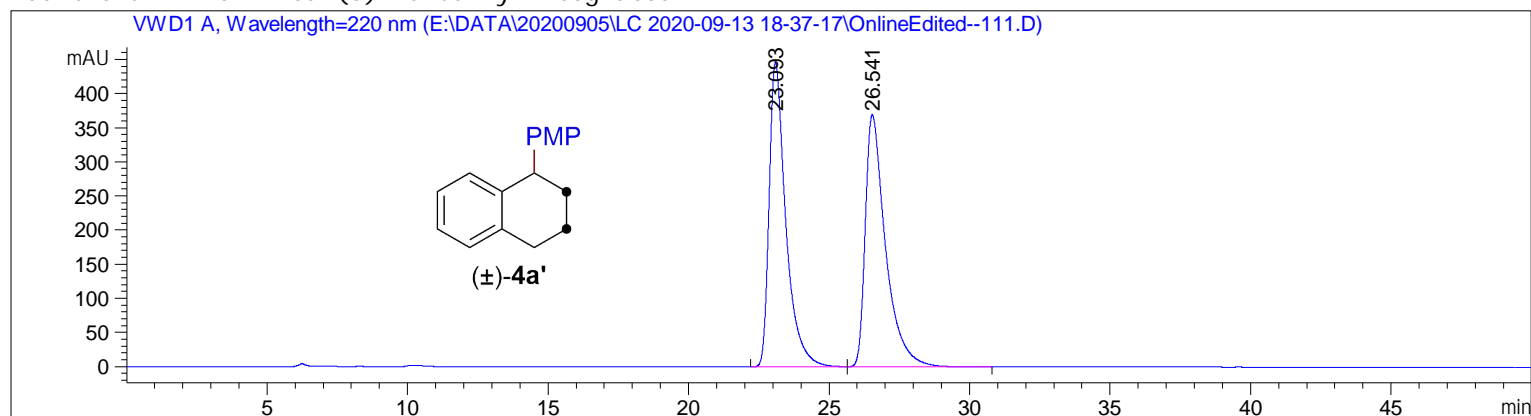

```

=====
                          Area Percent Report
=====
  
```

```

Sorted By      :      Signal
Multiplier     :      1.0000
Dilution      :      1.0000
Do not use Multiplier & Dilution Factor with ISTDs
  
```

Signal 1: VWD1 A, Wavelength=220 nm

| Peak # | RetTime [min] | Type | Width [min] | Area [mAU*s] | Height [mAU] | Area %  |
|--------|---------------|------|-------------|--------------|--------------|---------|
| 1      | 23.093        | BB   | 0.6134      | 1.83690e4    | 446.12729    | 49.8547 |
| 2      | 26.541        | BB   | 0.7399      | 1.84760e4    | 369.18671    | 50.1453 |

```
Totals :                3.68450e4  815.31400
```

```

=====
*** End of Report ***
  
```

Sample Name: YH-17-170-EE

```

=====
Acq. Operator   : SYSTEM                               Seq. Line : 112
Acq. Instrument : HPLC1260                             Location  : P1-C4
Injection Date  : 9/16/2020 3:50:38 AM                 Inj       : 1
                                                    Inj Volume: 3.000 µl
Different Inj Volume from Sample Entry! Actual Inj Volume : 1.000 µl
Acq. Method     : E:\DATA\20200905\LC 2020-09-13 18-37-17\1EtOH_50_5_1.M
Last changed    : 9/15/2020 3:46:59 PM by SYSTEM
Analysis Method : E:\DATA\20200905\LC 2020-09-13 18-37-17\1EtOH_50_5_1.M (Sequence Method)
Last changed    : 9/16/2020 9:20:20 AM by SYSTEM
                  (modified after loading)
Additional Info : Peak(s) manually integrated
  
```

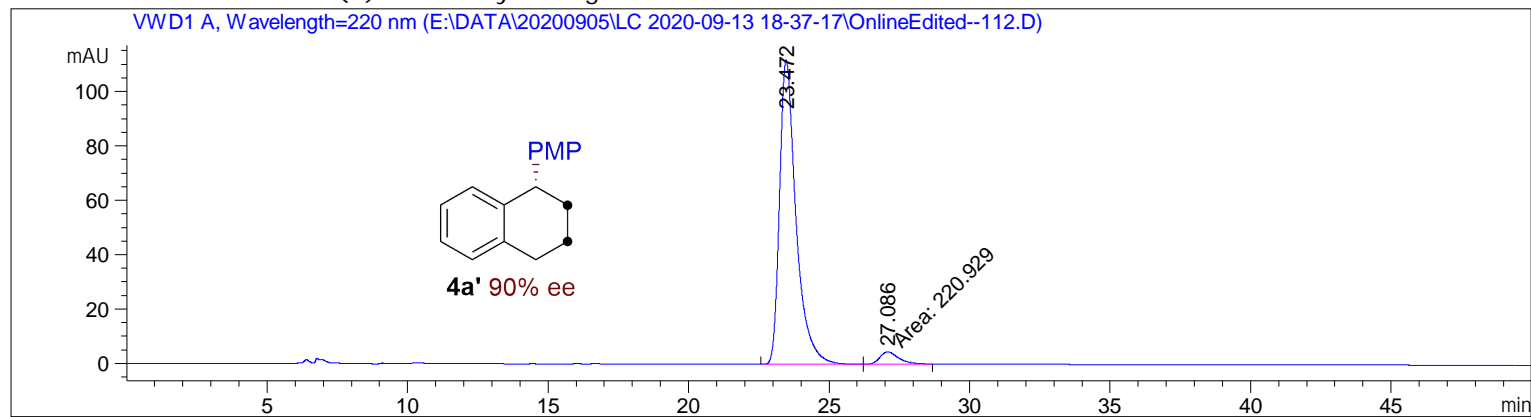

```

=====
                          Area Percent Report
=====
  
```

```

Sorted By      :      Signal
Multiplier     :      1.0000
Dilution       :      1.0000
Do not use Multiplier & Dilution Factor with ISTDs
  
```

Signal 1: VWD1 A, Wavelength=220 nm

| Peak # | RetTime [min] | Type | Width [min] | Area [mAU*s] | Height [mAU] | Area %  |
|--------|---------------|------|-------------|--------------|--------------|---------|
| 1      | 23.472        | BB   | 0.6120      | 4572.08252   | 111.81881    | 95.3906 |
| 2      | 27.086        | MF   | 0.8030      | 220.92908    | 4.58552      | 4.6094  |

```
Totals :                      4793.01160  116.40432
```

```

=====
*** End of Report ***
  
```

Sample Name: YH-18-81-RAC

```

=====
Acq. Operator   : SYSTEM                      Seq. Line :    5
Acq. Instrument : HPLC1260                   Location  : P1-A1
Injection Date  : 11/2/2020 9:17:03 PM      Inj       :    1
                                           Inj Volume: 3.000 µl
Different Inj Volume from Sample Entry! Actual Inj Volume : 2.000 µl
Acq. Method     : E:\DATA\20201027\LC 2020-11-02 19-12-04\51PA_60_8_3.M
Last changed    : 11/2/2020 8:34:42 PM by SYSTEM
Analysis Method : E:\DATA\20201027\LC 2020-11-02 19-12-04\51PA_60_8_3.M (Sequence Method)
Last changed    : 11/3/2020 8:16:37 AM by SYSTEM
                 (modified after loading)
Additional Info : Peak(s) manually integrated
  
```

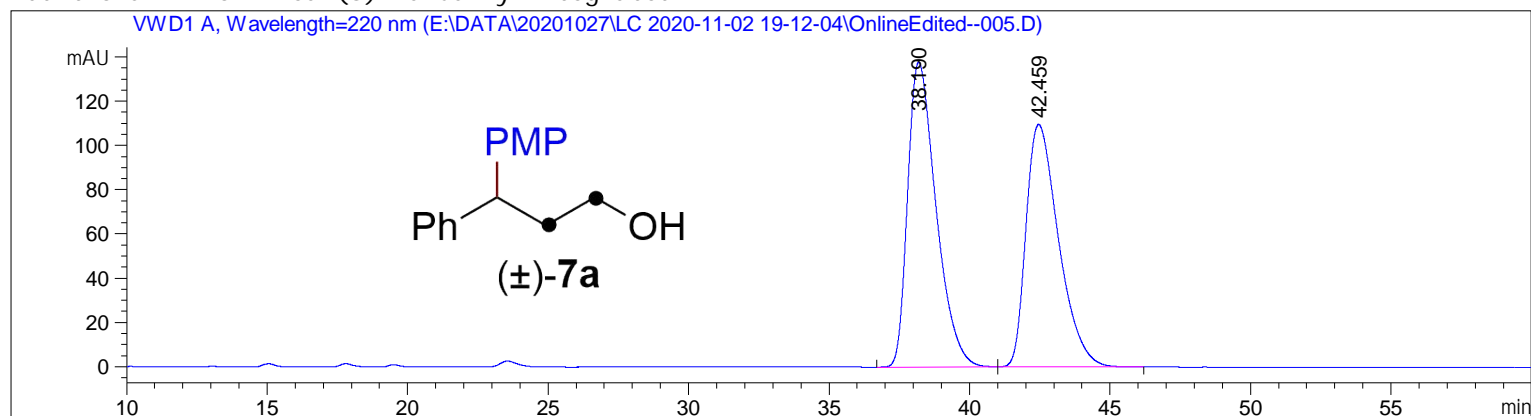

```

=====
                          Area Percent Report
=====
  
```

```

Sorted By      :      Signal
Multiplier     :      1.0000
Dilution       :      1.0000
Do not use Multiplier & Dilution Factor with ISTDs
  
```

Signal 1: VWD1 A, Wavelength=220 nm

| Peak # | RetTime [min] | Type | Width [min] | Area [mAU*s] | Height [mAU] | Area %  |
|--------|---------------|------|-------------|--------------|--------------|---------|
| 1      | 38.190        | BB   | 1.0737      | 9665.29883   | 137.73904    | 52.2905 |
| 2      | 42.459        | BB   | 1.2331      | 8818.56152   | 109.55659    | 47.7095 |

```
Totals :                      1.84839e4  247.29563
```

```

=====
*** End of Report ***
  
```

Sample Name: YH-18-81-EE

```

=====
Acq. Operator   : SYSTEM                      Seq. Line :    6
Acq. Instrument : HPLC1260                   Location  : P1-A2
Injection Date  : 11/2/2020 10:17:51 PM      Inj       :    1
                                           Inj Volume: 3.000 µl
Acq. Method     : E:\DATA\20201027\LC 2020-11-02 19-12-04\51PA_60_8_3.M
Last changed    : 11/2/2020 8:34:42 PM by SYSTEM
Analysis Method : E:\DATA\20201027\LC 2020-11-02 19-12-04\51PA_60_8_3.M (Sequence Method)
Last changed    : 11/3/2020 8:16:37 AM by SYSTEM
                  (modified after loading)
Additional Info  : Peak(s) manually integrated
  
```

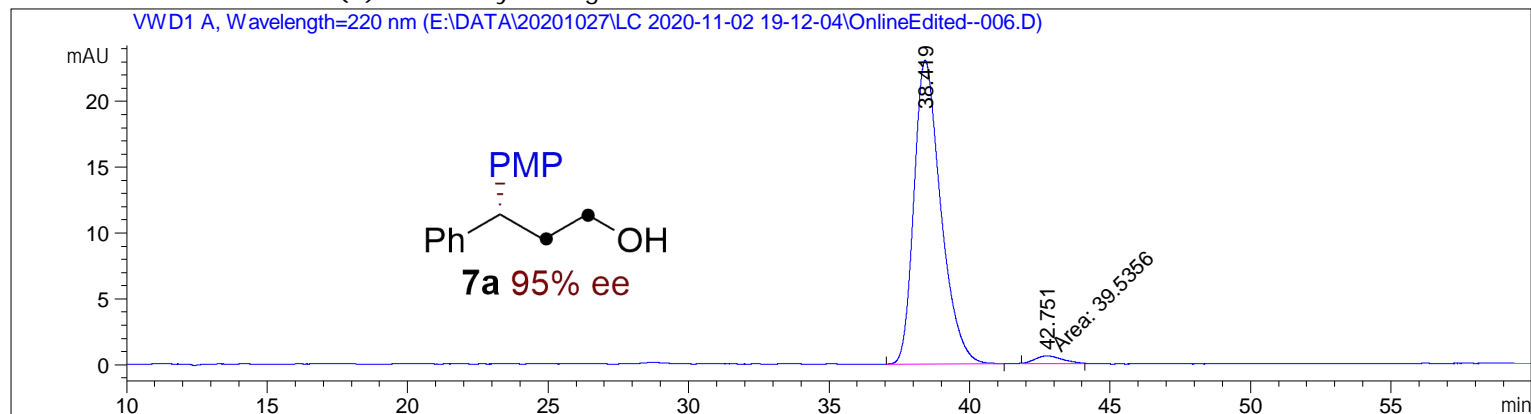

```

=====
                          Area Percent Report
=====
  
```

```

Sorted By      :      Signal
Multiplier     :      1.0000
Dilution       :      1.0000
Do not use Multiplier & Dilution Factor with ISTDs
  
```

Signal 1: VWD1 A, Wavelength=220 nm

| Peak # | RetTime [min] | Type | Width [min] | Area [mAU*s] | Height [mAU] | Area %  |
|--------|---------------|------|-------------|--------------|--------------|---------|
| 1      | 38.419        | BB   | 0.9930      | 1529.97595   | 23.06288     | 97.4810 |
| 2      | 42.751        | MF   | 1.1403      | 39.53560     | 5.77867e-1   | 2.5190  |

```
Totals :                      1569.51155    23.64074
```

```

=====
*** End of Report ***
  
```

Sample Name: YH-18-92-RAC-AD

```

=====
Acq. Operator   : SYSTEM                               Seq. Line :   90
Acq. Instrument : HPLC1260                             Location  : P1-D3
Injection Date  : 11/10/2020 5:13:10 AM                Inj       :    1
                                                    Inj Volume: 3.000 µl
Different Inj Volume from Sample Entry! Actual Inj Volume : 2.000 µl
Acq. Method     : E:\DATA\20201027\LC 2020-11-08 10-17-40\51PA_60_10_3.M
Last changed    : 11/9/2020 3:42:20 PM by SYSTEM
Analysis Method : E:\DATA\20201027\LC 2020-11-08 10-17-40\51PA_60_10_3.M (Sequence Method)
Last changed    : 11/10/2020 9:02:46 AM by SYSTEM
                (modified after loading)
=====

```

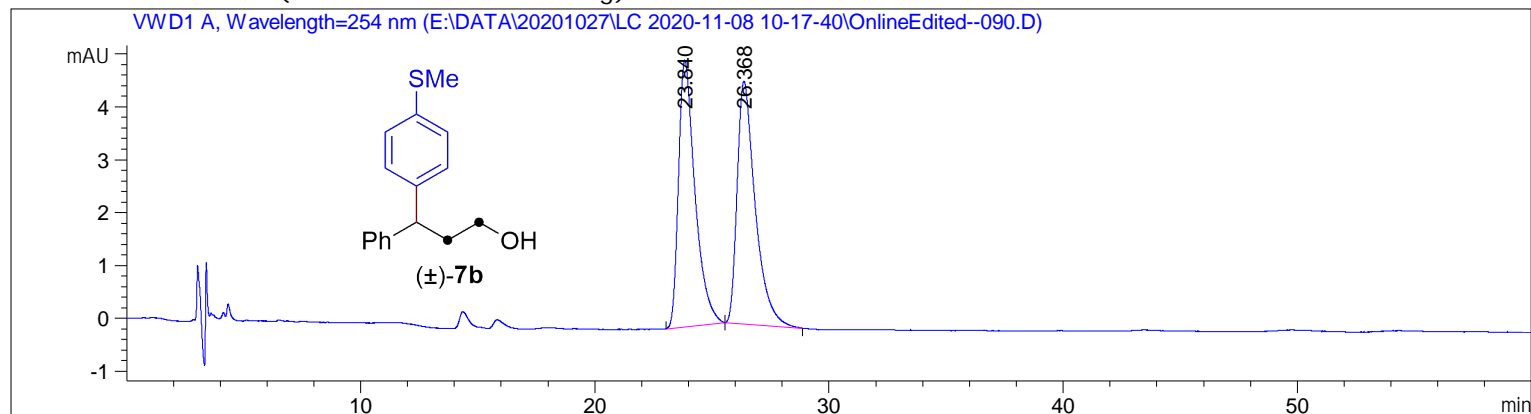

```

=====
                          Area Percent Report
=====

```

```

Sorted By      :      Signal
Multiplier     :      1.0000
Dilution      :      1.0000
Do not use Multiplier & Dilution Factor with ISTDs

```

Signal 1: VWD1 A, Wavelength=254 nm

| Peak # | RetTime [min] | Type | Width [min] | Area [mAU*s] | Height [mAU] | Area %  |
|--------|---------------|------|-------------|--------------|--------------|---------|
| 1      | 23.840        | BB   | 0.6979      | 246.77345    | 5.04253      | 50.0282 |
| 2      | 26.368        | BB   | 0.7664      | 246.49480    | 4.59865      | 49.9718 |

```
Totals :                493.26825    9.64117
```

```

=====
*** End of Report ***
=====

```

Sample Name: YH-18-92-EE

```

=====
Acq. Operator   : SYSTEM                      Seq. Line :   91
Acq. Instrument : HPLC1260                   Location  : P1-D4
Injection Date  : 11/10/2020 6:14:00 AM      Inj       :    1
                                           Inj Volume: 3.000 µl
Different Inj Volume from Sample Entry! Actual Inj Volume : 2.000 µl
Acq. Method     : E:\DATA\20201027\LC 2020-11-08 10-17-40\51PA_60_10_3.M
Last changed    : 11/9/2020 3:42:20 PM by SYSTEM
Analysis Method : E:\DATA\20201027\LC 2020-11-08 10-17-40\51PA_60_10_3.M (Sequence Method)
Last changed    : 11/10/2020 9:02:46 AM by SYSTEM
                  (modified after loading)

```

Additional Info : Peak(s) manually integrated

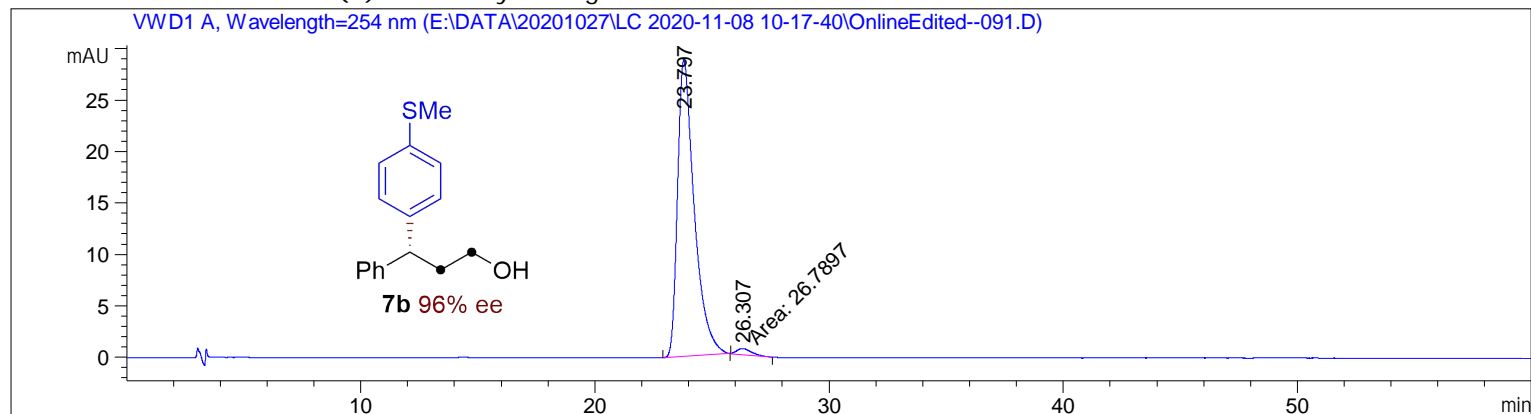

```

=====
                          Area Percent Report
=====

```

```

Sorted By      :      Signal
Multiplier     :      1.0000
Dilution       :      1.0000
Do not use Multiplier & Dilution Factor with ISTDs

```

Signal 1: VWD1 A, Wavelength=254 nm

| Peak # | RetTime [min] | Type | Width [min] | Area [mAU*s] | Height [mAU] | Area %  |
|--------|---------------|------|-------------|--------------|--------------|---------|
| 1      | 23.797        | BB   | 0.7363      | 1428.68213   | 28.77318     | 98.1594 |
| 2      | 26.307        | MM   | 0.7397      | 26.78973     | 6.03619e-1   | 1.8406  |

```
Totals :                      1455.47186    29.37680
```

```

=====
*** End of Report ***

```

Sample Name: YH-18-90-RAC

```

=====
Acq. Operator   : SYSTEM                      Seq. Line :   84
Acq. Instrument : HPLC1260                   Location  : P1-D1
Injection Date  : 11/10/2020 12:57:55 AM     Inj       :    1
                                           Inj Volume: 3.000 µl
Different Inj Volume from Sample Entry! Actual Inj Volume : 2.000 µl
Acq. Method     : E:\DATA\20201027\LC 2020-11-08 10-17-40\251PA_40_10_4.M
Last changed    : 11/9/2020 3:38:40 PM by SYSTEM
Analysis Method : E:\DATA\20201027\LC 2020-11-08 10-17-40\251PA_40_10_4.M (Sequence Method)
Last changed    : 11/10/2020 9:00:06 AM by SYSTEM
                 (modified after loading)

```

Additional Info : Peak(s) manually integrated

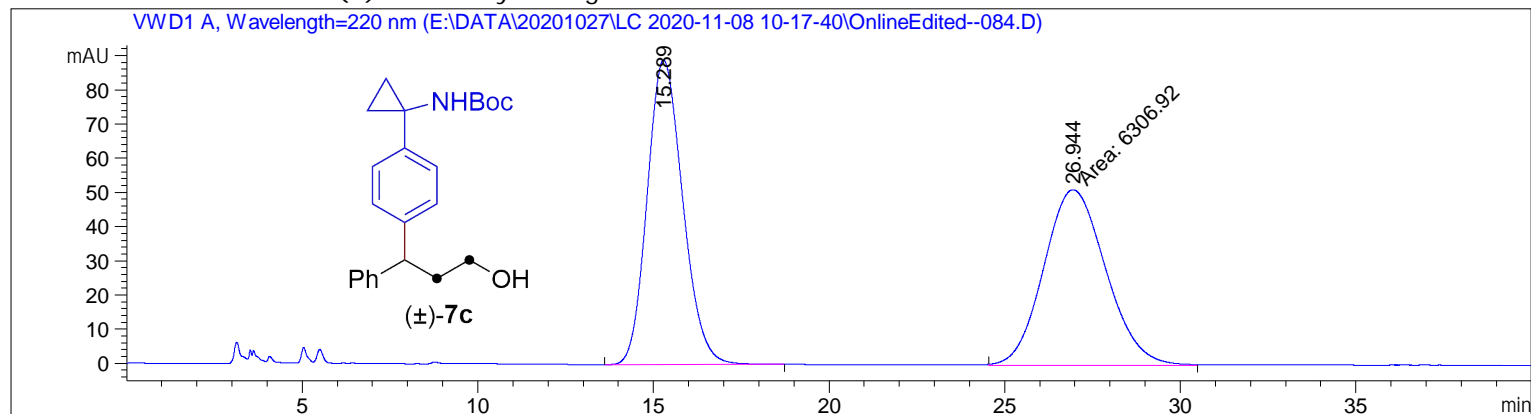

```

=====
                          Area Percent Report
=====

```

```

Sorted By      :      Signal
Multiplier     :      1.0000
Dilution      :      1.0000
Do not use Multiplier & Dilution Factor with ISTDs

```

Signal 1: VWD1 A, Wavelength=220 nm

| Peak # | RetTime [min] | Type | Width [min] | Area [mAU*s] | Height [mAU] | Area %  |
|--------|---------------|------|-------------|--------------|--------------|---------|
| 1      | 15.289        | BB   | 1.0925      | 6273.77100   | 88.99331     | 49.8683 |
| 2      | 26.944        | MM   | 2.0482      | 6306.91895   | 51.32027     | 50.1317 |

```
Totals :                      1.25807e4  140.31358
```

```

=====
*** End of Report ***

```



Sample Name: YH-18-90-EE

```

=====
Acq. Operator   : SYSTEM                      Seq. Line :   85
Acq. Instrument : HPLC1260                   Location  : P1-D2
Injection Date  : 11/10/2020 1:38:46 AM      Inj       :    1
                                           Inj Volume: 3.000 µl
Different Inj Volume from Sample Entry! Actual Inj Volume : 2.000 µl
Acq. Method     : E:\DATA\20201027\LC 2020-11-08 10-17-40\251PA_40_10_4.M
Last changed    : 11/9/2020 3:38:40 PM by SYSTEM
Analysis Method : E:\DATA\20201027\LC 2020-11-08 10-17-40\251PA_40_10_4.M (Sequence Method)
Last changed    : 11/10/2020 9:00:06 AM by SYSTEM
                 (modified after loading)

```

Additional Info : Peak(s) manually integrated

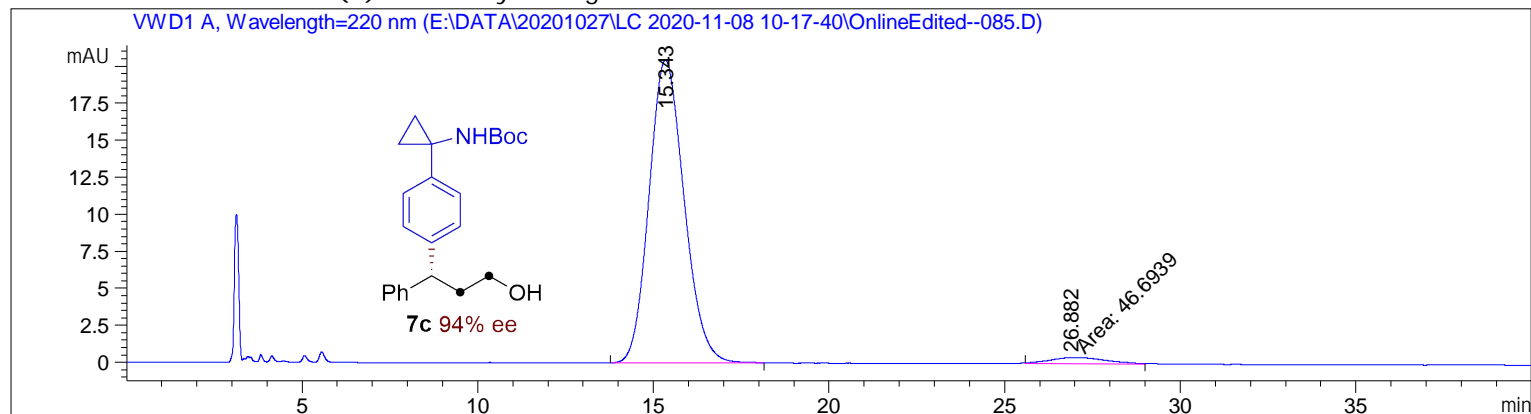

```

=====
                          Area Percent Report
=====

```

```

Sorted By      :      Signal
Multiplier     :      1.0000
Dilution       :      1.0000
Do not use Multiplier & Dilution Factor with ISTDs

```

Signal 1: VWD1 A, Wavelength=220 nm

| Peak # | RetTime [min] | Type | Width [min] | Area [mAU*s] | Height [mAU] | Area %  |
|--------|---------------|------|-------------|--------------|--------------|---------|
| 1      | 15.343        | BB   | 1.0508      | 1418.77441   | 20.43937     | 96.8137 |
| 2      | 26.882        | FM   | 1.8297      | 46.69392     | 4.25322e-1   | 3.1863  |

```
Totals :                      1465.46833    20.86470
```

```

=====
*** End of Report ***

```

Sample Name: YH-18-83-RAC

```

=====
Acq. Operator   : SYSTEM                      Seq. Line :    7
Acq. Instrument : HPLC1260                   Location  : P1-B1
Injection Date  : 11/5/2020 3:21:53 PM       Inj       :    1
                                           Inj Volume: 3.000 µl
Different Inj Volume from Sample Entry! Actual Inj Volume : 1.000 µl
Acq. Method     : E:\DATA\20201027\LC 2020-11-05 12-38-40\101PA_30_10_1.M
Last changed    : 11/5/2020 1:49:04 PM by SYSTEM
Analysis Method : E:\DATA\20201027\LC 2020-11-05 12-38-40\101PA_30_10_1.M (Sequence Method)
Last changed    : 11/5/2020 2:19:41 PM by SYSTEM
Additional Info : Peak(s) manually integrated
=====

```

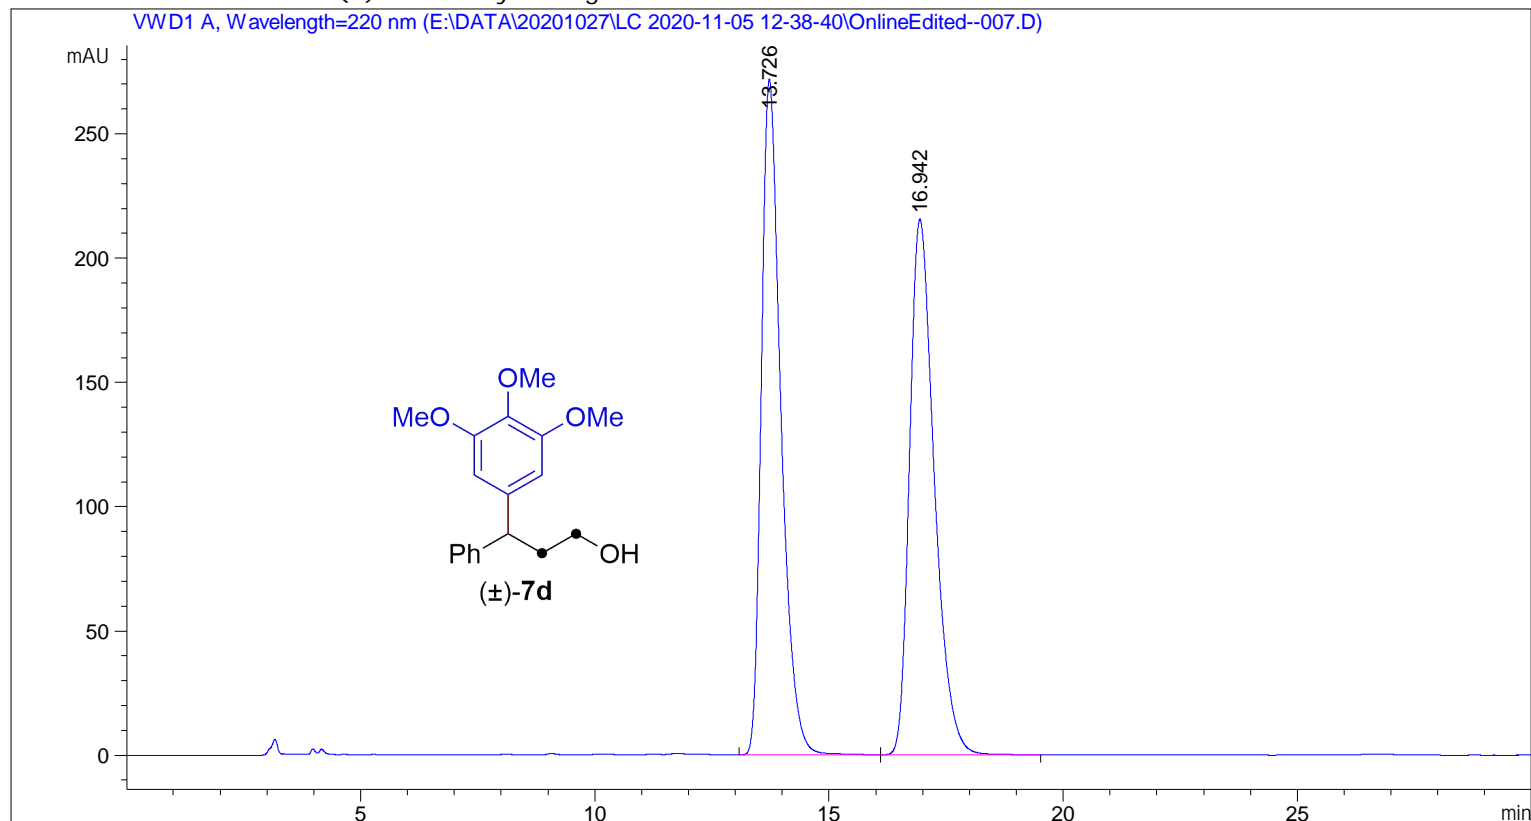

```

=====
                          Area Percent Report
=====

```

```

Sorted By      :      Signal
Multiplier     :      1.0000
Dilution      :      1.0000
Use Multiplier & Dilution Factor with ISTDs

```

Signal 1: VWD1 A, Wavelength=220 nm

| Peak # | RetTime [min] | Type | Width [min] | Area [mAU*s] | Height [mAU] | Area %  |
|--------|---------------|------|-------------|--------------|--------------|---------|
| 1      | 13.726        | BB   | 0.4386      | 7893.44824   | 271.93649    | 49.9928 |
| 2      | 16.942        | BB   | 0.5595      | 7895.72559   | 215.45660    | 50.0072 |

```
Totals :                      1.57892e4  487.39310
```

Sample Name: YH-18-83-EE

```

=====
Acq. Operator   : SYSTEM                      Seq. Line :    8
Acq. Instrument : HPLC1260                   Location  : P1-B2
Injection Date  : 11/5/2020 3:52:38 PM      Inj       :    1
                                           Inj Volume: 3.000 µl
Different Inj Volume from Sample Entry! Actual Inj Volume : 2.000 µl
Acq. Method     : E:\DATA\20201027\LC 2020-11-05 12-38-40\101PA_30_10_1.M
Last changed    : 11/5/2020 1:49:04 PM by SYSTEM
Analysis Method : E:\DATA\20201027\LC 2020-11-05 12-38-40\101PA_30_10_1.M (Sequence Method)
Last changed    : 11/5/2020 2:19:41 PM by SYSTEM
Additional Info  : Peak(s) manually integrated
=====

```

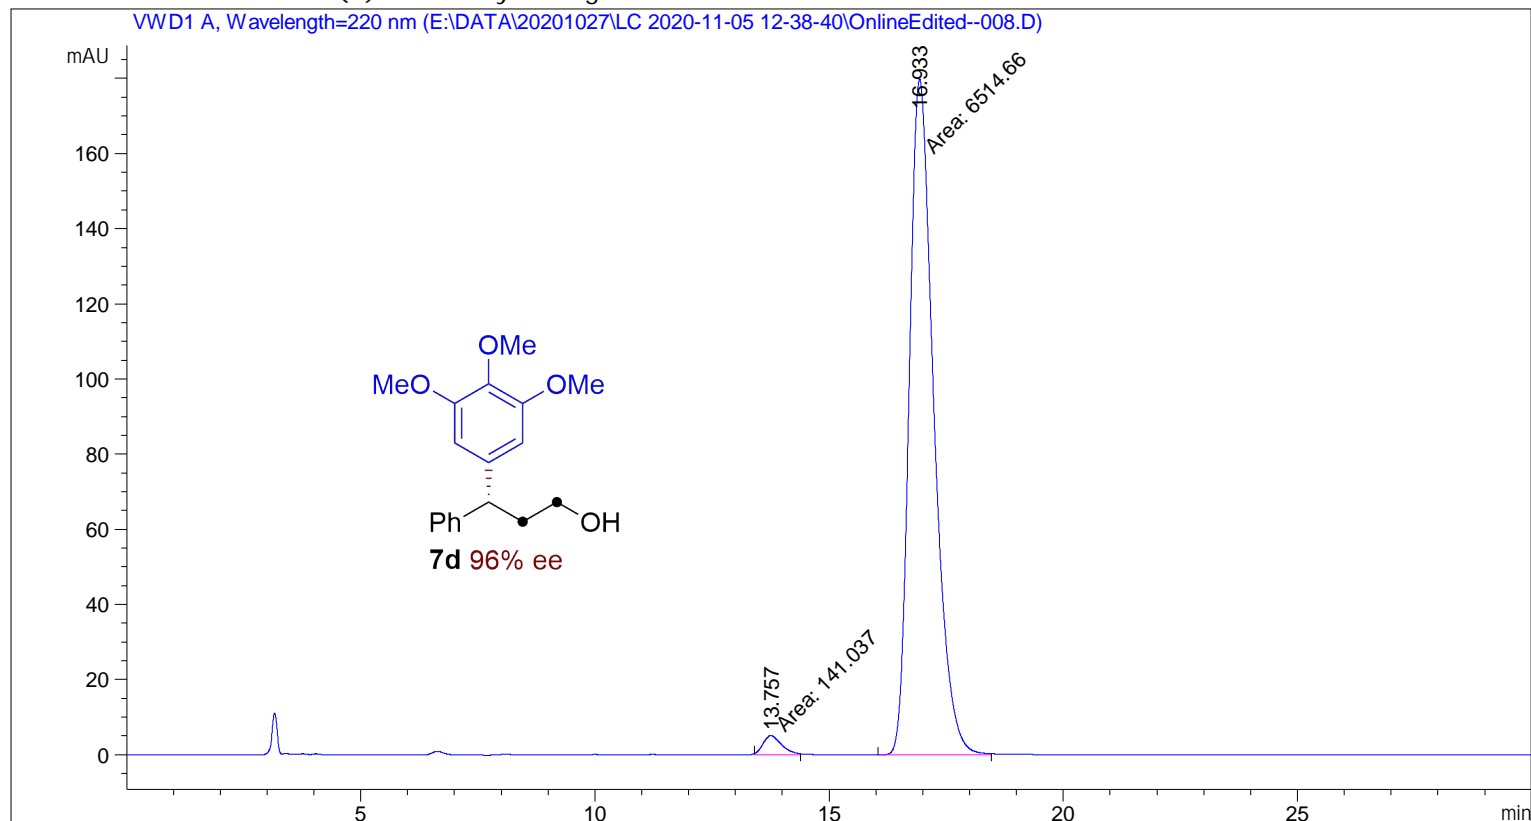

```

=====
                          Area Percent Report
=====

```

```

Sorted By      :      Signal
Multiplier     :      1.0000
Dilution      :      1.0000
Use Multiplier & Dilution Factor with ISTDs

```

Signal 1: VWD1 A, Wavelength=220 nm

| Peak # | RetTime [min] | Type | Width [min] | Area [mAU*s] | Height [mAU] | Area %  |
|--------|---------------|------|-------------|--------------|--------------|---------|
| 1      | 13.757        | FM   | 0.4611      | 141.03728    | 5.09765      | 2.1190  |
| 2      | 16.933        | MF   | 0.6036      | 6514.66016   | 179.87325    | 97.8810 |

```
Totals :                      6655.69743  184.97089
```

Sample Name: YH-18-82-RAC

```

=====
Acq. Operator   : SYSTEM                      Seq. Line :    8
Acq. Instrument : HPLC1260                   Location  : P1-A3
Injection Date  : 11/2/2020 11:39:29 PM      Inj       :    1
                                           Inj Volume: 3.000 µl
Different Inj Volume from Sample Entry! Actual Inj Volume : 2.000 µl
Acq. Method     : E:\DATA\20201027\LC 2020-11-02 19-12-04\201PA_30_10_3.M
Last changed    : 11/2/2020 7:12:04 PM by SYSTEM
Analysis Method : E:\DATA\20201027\LC 2020-11-02 19-12-04\201PA_30_10_3.M (Sequence Method)
Last changed    : 11/3/2020 8:15:39 AM by SYSTEM
                  (modified after loading)
Additional Info : Peak(s) manually integrated
  
```

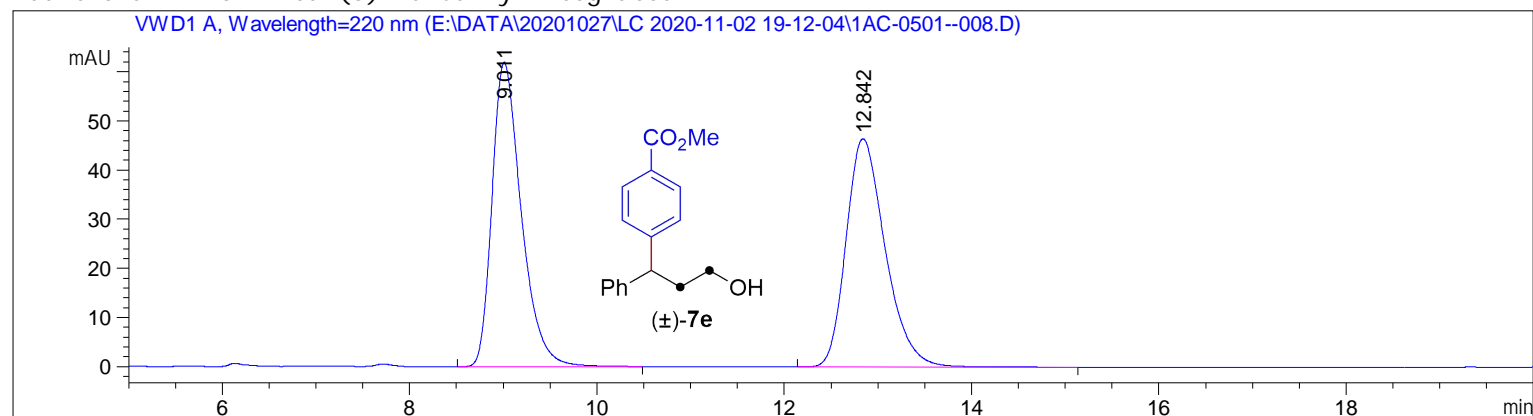

```

=====
                          Area Percent Report
=====
  
```

```

Sorted By      :      Signal
Multiplier     :      1.0000
Dilution      :      1.0000
Do not use Multiplier & Dilution Factor with ISTDs
  
```

Signal 1: VWD1 A, Wavelength=220 nm

| Peak # | RetTime [min] | Type | Width [min] | Area [mAU*s] | Height [mAU] | Area %  |
|--------|---------------|------|-------------|--------------|--------------|---------|
| 1      | 9.011         | BB   | 0.3291      | 1344.02332   | 61.95635     | 49.8827 |
| 2      | 12.842        | BB   | 0.4452      | 1350.34583   | 46.45029     | 50.1173 |

```
Totals :                      2694.36914  108.40664
```

```

=====
*** End of Report ***
  
```

Sample Name: YH-18-82-EE

```

=====
Acq. Operator   : SYSTEM                      Seq. Line :    9
Acq. Instrument : HPLC1260                   Location  : P1-A4
Injection Date  : 11/3/2020 12:10:16 AM      Inj       :    1
                                           Inj Volume: 3.000 µl

Acq. Method     : E:\DATA\20201027\LC 2020-11-02 19-12-04\201PA_30_10_3.M
Last changed    : 11/2/2020 7:12:04 PM by SYSTEM
Analysis Method : E:\DATA\20201027\LC 2020-11-02 19-12-04\201PA_30_10_3.M (Sequence Method)
Last changed    : 11/3/2020 8:15:01 AM by SYSTEM
                 (modified after loading)

Additional Info : Peak(s) manually integrated

```

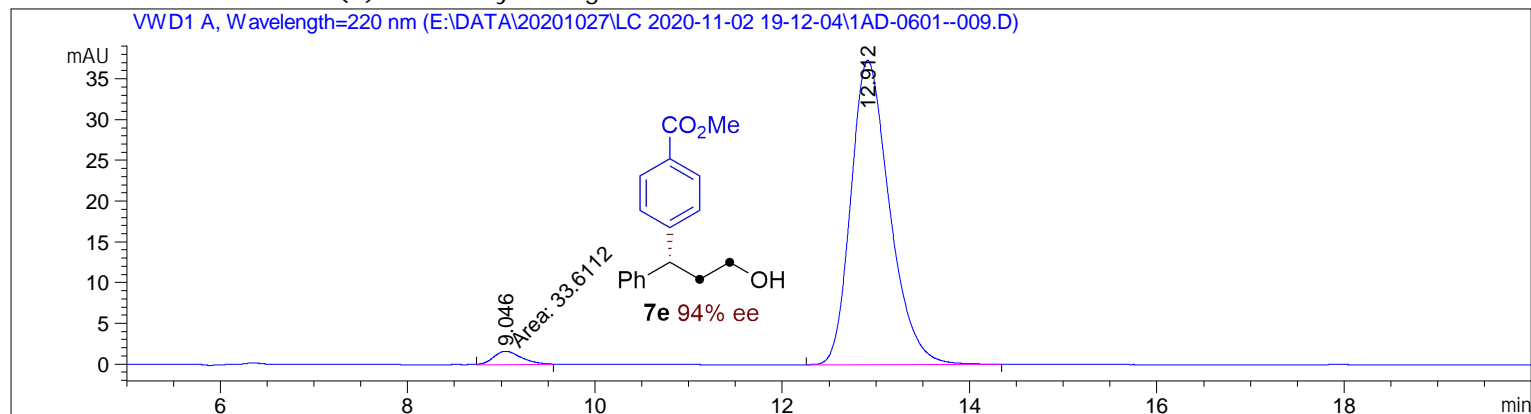

```

=====
                          Area Percent Report
=====

```

```

Sorted By      :      Signal
Multiplier     :      1.0000
Dilution      :      1.0000
Do not use Multiplier & Dilution Factor with ISTDs

```

Signal 1: VWD1 A, Wavelength=220 nm

| Peak # | RetTime [min] | Type | Width [min] | Area [mAU*s] | Height [mAU] | Area %  |
|--------|---------------|------|-------------|--------------|--------------|---------|
| 1      | 9.046         | MM   | 0.3439      | 33.61117     | 1.62896      | 3.0469  |
| 2      | 12.912        | BB   | 0.4383      | 1069.49963   | 37.32675     | 96.9531 |

```
Totals :                      1103.11081    38.95571
```

```

=====
*** End of Report ***

```

Sample Name: YH-18-89-RAC

```

=====
Acq. Operator   : SYSTEM                               Seq. Line :   63
Acq. Instrument : HPLC1260                             Location  : P1-A3
Injection Date  : 11/6/2020 3:02:15 PM                 Inj       :    2
                                                    Inj Volume: 3.000 µl
Different Inj Volume from Sample Entry! Actual Inj Volume : 1.000 µl
Acq. Method     : E:\DATA\20201027\LC 2020-11-05 12-38-40\301PA_30_0.8_3.M
Last changed    : 11/6/2020 2:57:07 PM by SYSTEM
Analysis Method : E:\DATA\20201027\LC 2020-11-05 12-38-40\301PA_30_0.8_3.M (Sequence Method)
Last changed    : 11/6/2020 7:47:03 PM by SYSTEM
                  (modified after loading)
Additional Info : Peak(s) manually integrated
  
```

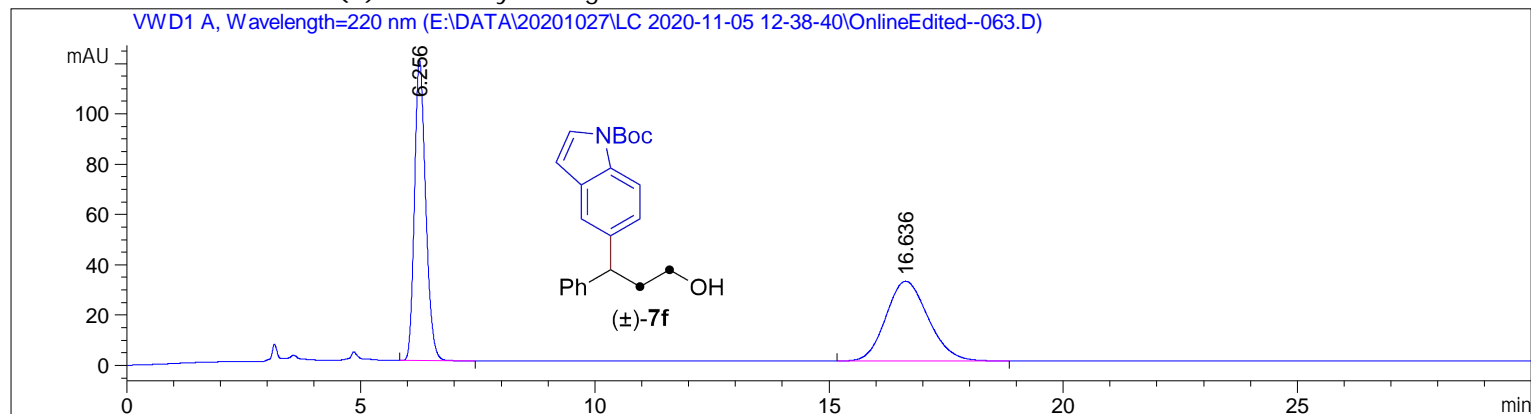

```

=====
                          Area Percent Report
=====
  
```

```

Sorted By      :      Signal
Multiplier     :      1.0000
Dilution       :      1.0000
Do not use Multiplier & Dilution Factor with ISTDs
  
```

Signal 1: VWD1 A, Wavelength=220 nm

| Peak # | RetTime [min] | Type | Width [min] | Area [mAU*s] | Height [mAU] | Area %  |
|--------|---------------|------|-------------|--------------|--------------|---------|
| 1      | 6.256         | BB   | 0.2551      | 1986.54639   | 119.43031    | 50.0496 |
| 2      | 16.636        | BB   | 0.9632      | 1982.60645   | 31.67539     | 49.9504 |

```
Totals :                      3969.15283  151.10570
```

```

=====
*** End of Report ***
  
```

Sample Name: YH-18-89-EE

```

=====
Acq. Operator   : SYSTEM                               Seq. Line :   64
Acq. Instrument : HPLC1260                           Location  : P1-A4
Injection Date  : 11/6/2020 3:33:01 PM                Inj       :    1
                                                    Inj Volume: 3.000 µl
Different Inj Volume from Sample Entry! Actual Inj Volume : 2.000 µl
Acq. Method     : E:\DATA\20201027\LC 2020-11-05 12-38-40\301PA_30_0.8_3.M
Last changed    : 11/6/2020 2:57:07 PM by SYSTEM
Analysis Method : E:\DATA\20201027\LC 2020-11-05 12-38-40\301PA_30_0.8_3.M (Sequence Method)
Last changed    : 11/6/2020 7:47:03 PM by SYSTEM
                  (modified after loading)

```

Additional Info : Peak(s) manually integrated

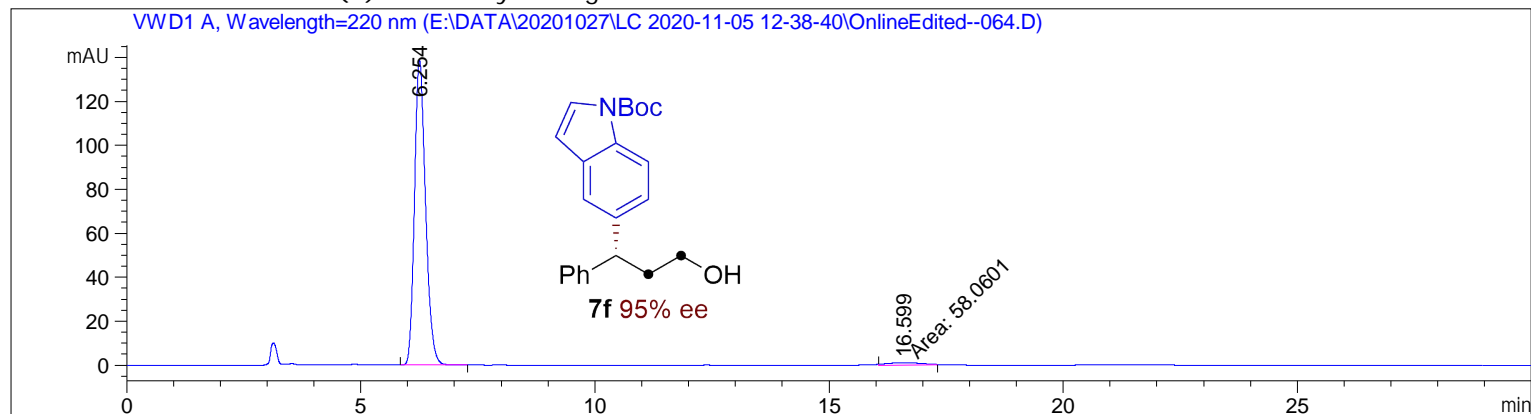

```

=====
                          Area Percent Report
=====

```

```

Sorted By      :      Signal
Multiplier     :      1.0000
Dilution       :      1.0000
Do not use Multiplier & Dilution Factor with ISTDs

```

Signal 1: VWD1 A, Wavelength=220 nm

| Peak # | RetTime [min] | Type | Width [min] | Area [mAU*s] | Height [mAU] | Area %  |
|--------|---------------|------|-------------|--------------|--------------|---------|
| 1      | 6.254         | BB   | 0.2525      | 2276.00708   | 138.65160    | 97.5125 |
| 2      | 16.599        | MF   | 0.8830      | 58.06006     | 1.09585      | 2.4875  |

```
Totals :                2334.06714  139.74745
```

```

=====
*** End of Report ***

```

Sample Name: YH-18-85-RAC

```

=====
Acq. Operator   : SYSTEM                      Seq. Line :   12
Acq. Instrument : HPLC1260                   Location  :   P1-B3
Injection Date  : 11/5/2020 5:26:51 PM      Inj       :    1
                                           Inj Volume: 3.000 µl
Different Inj Volume from Sample Entry! Actual Inj Volume : 1.000 µl
Acq. Method     : E:\DATA\20201027\LC 2020-11-05 12-38-40\01PA_60_10_3.M
Last changed    : 11/5/2020 6:11:04 PM by SYSTEM
                 (modified after loading)
Analysis Method : E:\DATA\20201027\LC 2020-11-05 12-38-40\01PA_60_10_3.M (Sequence Method)
Last changed    : 11/5/2020 7:05:40 PM by SYSTEM
                 (modified after loading)
Additional Info : Peak(s) manually integrated
=====

```

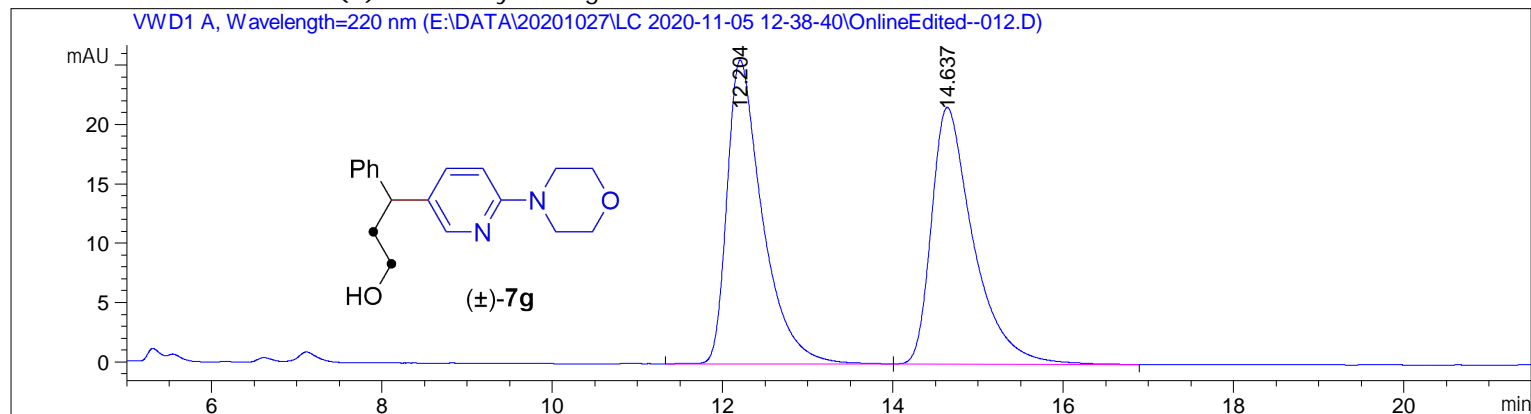

```

=====
                          Area Percent Report
=====

```

```

Sorted By      :      Signal
Multiplier     :      1.0000
Dilution       :      1.0000
Do not use Multiplier & Dilution Factor with ISTDs

```

Signal 1: VWD1 A, Wavelength=220 nm

| Peak # | RetTime [min] | Type | Width [min] | Area [mAU*s] | Height [mAU] | Area %  |
|--------|---------------|------|-------------|--------------|--------------|---------|
| 1      | 12.204        | BB   | 0.4263      | 739.40247    | 25.57660     | 50.0571 |
| 2      | 14.637        | BB   | 0.5043      | 737.71674    | 21.60793     | 49.9429 |

```
Totals :                      1477.11920    47.18453
```

```

=====
*** End of Report ***
=====

```



Sample Name: YH-18-85-EE

```

=====
Acq. Operator   : SYSTEM                               Seq. Line :   13
Acq. Instrument : HPLC1260                             Location  : P1-B4
Injection Date  : 11/5/2020 6:11:50 PM                 Inj       :    1
                                                    Inj Volume: 3.000 µl
Different Inj Volume from Sample Entry! Actual Inj Volume : 2.000 µl
Acq. Method     : E:\DATA\20201027\LC 2020-11-05 12-38-40\201PA_60_10_3.M
Last changed    : 11/5/2020 6:11:04 PM by SYSTEM
Analysis Method : E:\DATA\20201027\LC 2020-11-05 12-38-40\201PA_60_10_3.M (Sequence Method)
Last changed    : 11/5/2020 7:06:07 PM by SYSTEM
                  (modified after loading)

```

Additional Info : Peak(s) manually integrated

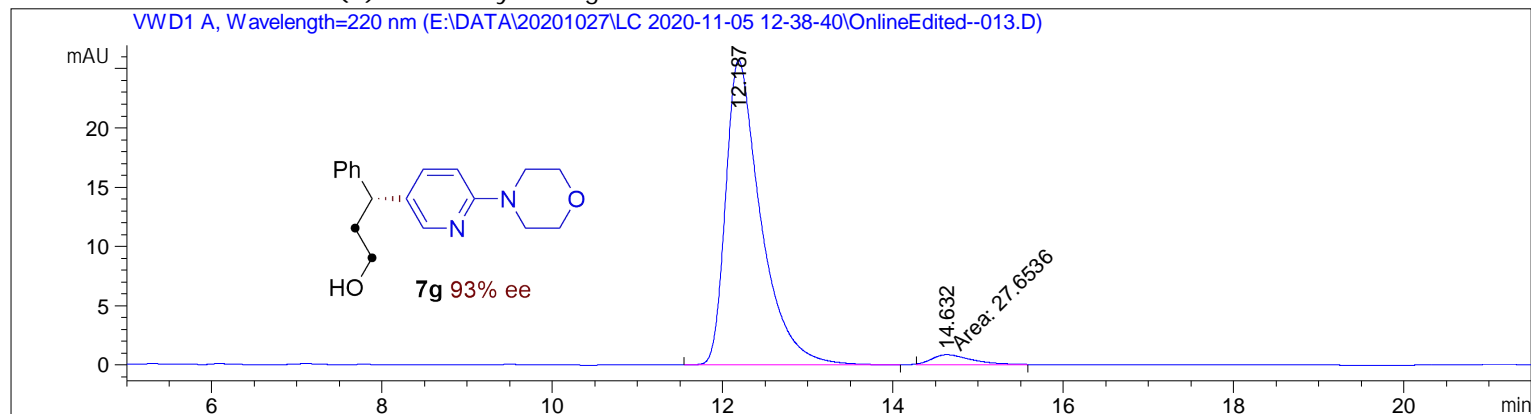

```

=====
                          Area Percent Report
=====

```

```

Sorted By      :      Signal
Multiplier     :      1.0000
Dilution       :      1.0000
Do not use Multiplier & Dilution Factor with ISTDs

```

Signal 1: VWD1 A, Wavelength=220 nm

| Peak # | RetTime [min] | Type | Width [min] | Area [mAU*s] | Height [mAU] | Area %  |
|--------|---------------|------|-------------|--------------|--------------|---------|
| 1      | 12.187        | BB   | 0.4210      | 735.36993    | 25.69036     | 96.3758 |
| 2      | 14.632        | FM   | 0.5482      | 27.65362     | 8.40750e-1   | 3.6242  |

```
Totals :                      763.02355    26.53111
```

```

=====
*** End of Report ***

```

Sample Name: YH-18-93-RAC-AD

```

=====
Acq. Operator   : SYSTEM                               Seq. Line :   96
Acq. Instrument : HPLC1260                             Location  : P1-D5
Injection Date  : 11/10/2020 9:18:26 AM                Inj       :    1
                                                    Inj Volume: 3.000 µl
Different Inj Volume from Sample Entry! Actual Inj Volume : 2.000 µl
Acq. Method     : E:\DATA\20201027\LC 2020-11-08 10-17-40\01PA_40_10_3.M
Last changed    : 11/9/2020 3:44:13 PM by SYSTEM
Analysis Method : E:\DATA\20201027\LC 2020-11-08 10-17-40\01PA_40_10_3.M (Sequence Method)
Last changed    : 11/10/2020 10:59:07 AM by SYSTEM
                  (modified after loading)
Additional Info : Peak(s) manually integrated
    
```

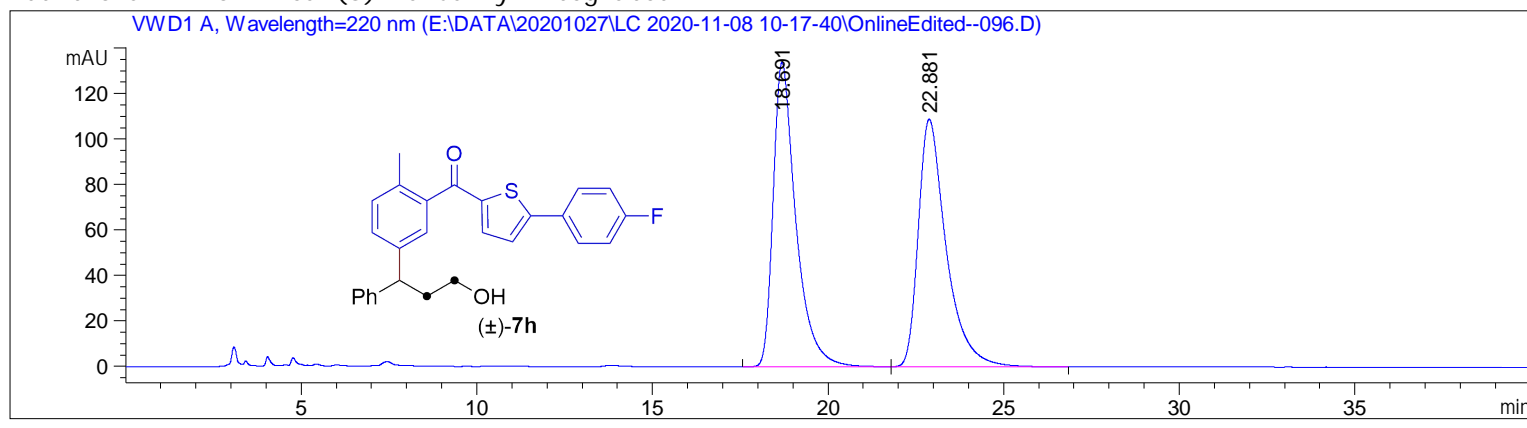

Area Percent Report

```

Sorted By      :      Signal
Multiplier     :      1.0000
Dilution       :      1.0000
Do not use Multiplier & Dilution Factor with ISTDs
    
```

Signal 1: VWD1 A, Wavelength=220 nm

| Peak # | RetTime [min] | Type | Width [min] | Area [mAU*s] | Height [mAU] | Area %  |
|--------|---------------|------|-------------|--------------|--------------|---------|
| 1      | 18.691        | BB   | 0.6668      | 6010.69727   | 133.88478    | 50.0093 |
| 2      | 22.881        | BB   | 0.8188      | 6008.46924   | 108.88432    | 49.9907 |

Totals : 1.20192e4 242.76910

\*\*\* End of Report \*\*\*

Sample Name: YH-18-93-EE

```

=====
Acq. Operator   : SYSTEM                      Seq. Line :   97
Acq. Instrument : HPLC1260                  Location  : P1-D6
Injection Date  : 11/10/2020 9:59:13 AM      Inj       :    1
                                           Inj Volume: 3.000 µl
Different Inj Volume from Sample Entry! Actual Inj Volume : 2.000 µl
Acq. Method     : E:\DATA\20201027\LC 2020-11-08 10-17-40\01PA_40_10_3.M
Last changed    : 11/9/2020 3:44:13 PM by SYSTEM
Analysis Method : E:\DATA\20201027\LC 2020-11-08 10-17-40\01PA_40_10_3.M (Sequence Method)
Last changed    : 11/10/2020 10:59:07 AM by SYSTEM
                 (modified after loading)
Additional Info : Peak(s) manually integrated
  
```

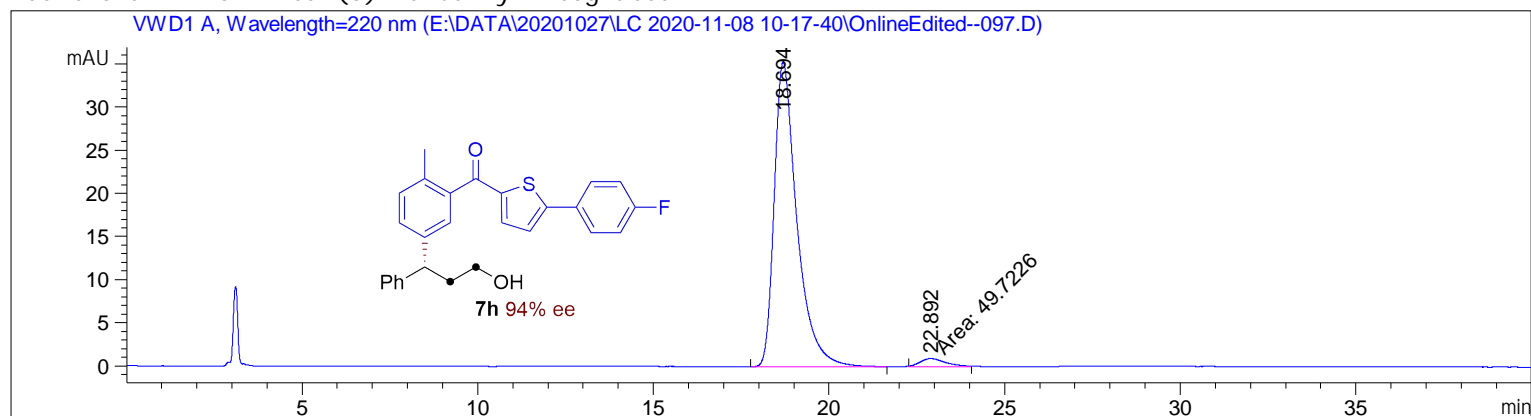

```

=====
                          Area Percent Report
=====
  
```

```

Sorted By      :      Signal
Multiplier     :      1.0000
Dilution       :      1.0000
Do not use Multiplier & Dilution Factor with ISTDs
  
```

Signal 1: VWD1 A, Wavelength=220 nm

| Peak # | RetTime [min] | Type | Width [min] | Area [mAU*s] | Height [mAU] | Area %  |
|--------|---------------|------|-------------|--------------|--------------|---------|
| 1      | 18.694        | BB   | 0.6654      | 1585.69543   | 35.28029     | 96.9596 |
| 2      | 22.892        | FM   | 0.8705      | 49.72256     | 9.52012e-1   | 3.0404  |

```
Totals :                      1635.41800   36.23230
```

```

=====
*** End of Report ***
  
```

Sample Name: YH-18-101-RAC

```

=====
Acq. Operator   : SYSTEM                               Seq. Line :   37
Acq. Instrument : HPLC1260                           Location  : P1-F1
Injection Date  : 11/17/2020 3:35:54 AM              Inj       :    1
                                                    Inj Volume: 3.000 µl
Different Inj Volume from Sample Entry! Actual Inj Volume : 1.000 µl
Acq. Method     : E:\DATA\20201027\LC 2020-11-16 13-35-16\01PA_50_10_4.M
Last changed    : 11/16/2020 8:05:16 PM by SYSTEM
Analysis Method : E:\DATA\20201027\LC 2020-11-16 13-35-16\01PA_50_10_4.M (Sequence Method)
Last changed    : 1/20/2022 10:11:35 AM by SYSTEM
                (modified after loading)

```

Additional Info : Peak(s) manually integrated

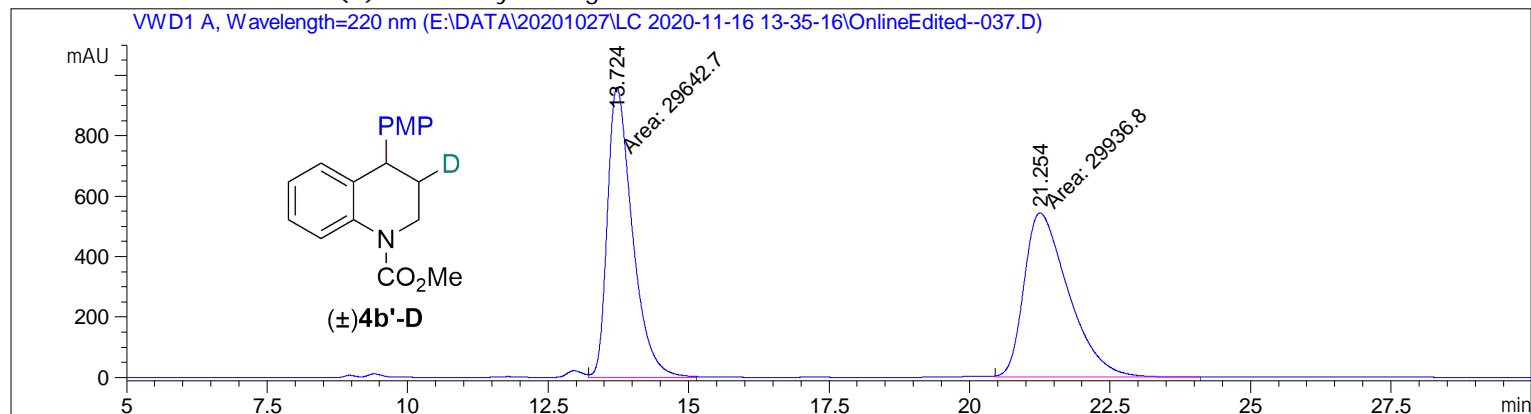

```

=====
                        Area Percent Report
=====

```

```

Sorted By      :      Signal
Multiplier     :      1.0000
Dilution       :      1.0000
Do not use Multiplier & Dilution Factor with ISTDs

```

Signal 1: VWD1 A, Wavelength=220 nm

| Peak # | RetTime [min] | Type | Width [min] | Area [mAU*s] | Height [mAU] | Area %  |
|--------|---------------|------|-------------|--------------|--------------|---------|
| 1      | 13.724        | MF   | 0.5154      | 2.96427e4    | 958.56610    | 49.7532 |
| 2      | 21.254        | FM   | 0.9173      | 2.99368e4    | 543.94635    | 50.2468 |

```
Totals :                5.95795e4  1502.51245
```

```

=====
*** End of Report ***
=====

```

Sample Name: YH-18-101-1

```

=====
Acq. Operator   : SYSTEM                      Seq. Line :   38
Acq. Instrument : HPLC1260                   Location  : P1-F2
Injection Date  : 11/17/2020 4:26:42 AM      Inj       :    1
                                           Inj Volume: 3.000 µl
Acq. Method     : E:\DATA\20201027\LC 2020-11-16 13-35-16\201PA_50_10_4.M
Last changed    : 11/16/2020 8:05:16 PM by SYSTEM
Analysis Method : E:\DATA\20201027\LC 2020-11-16 13-35-16\201PA_50_10_4.M (Sequence Method)
Last changed    : 1/20/2022 10:12:48 AM by SYSTEM
                 (modified after loading)
Additional Info : Peak(s) manually integrated
  
```

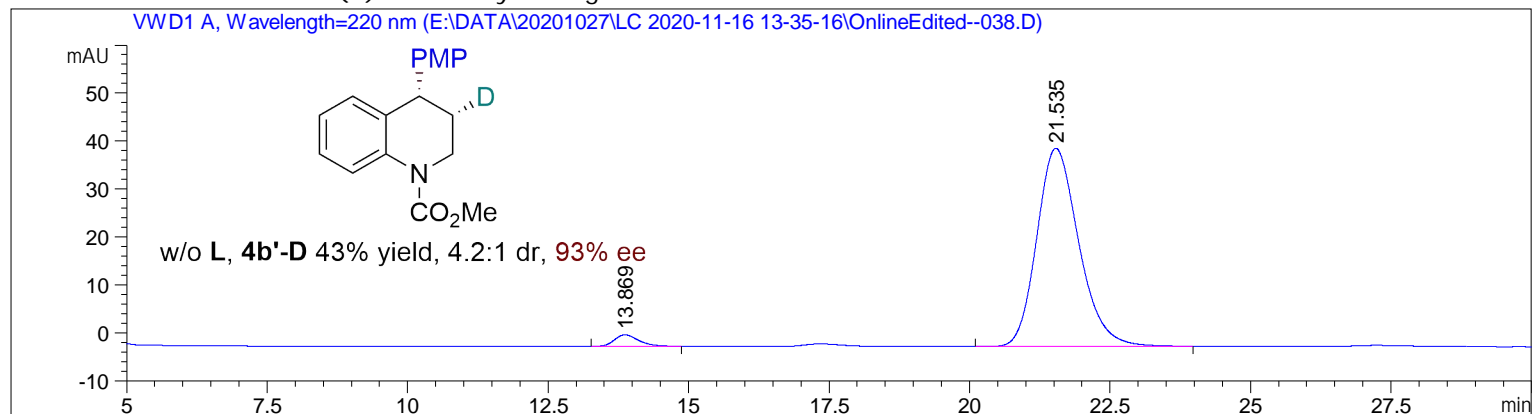

```

=====
                          Area Percent Report
=====
  
```

```

Sorted By           :      Signal
Multiplier          :      1.0000
Dilution            :      1.0000
Do not use Multiplier & Dilution Factor with ISTDs
  
```

Signal 1: VWD1 A, Wavelength=220 nm

| Peak # | RetTime [min] | Type | Width [min] | Area [mAU*s] | Height [mAU] | Area %  |
|--------|---------------|------|-------------|--------------|--------------|---------|
| 1      | 13.869        | BB   | 0.4527      | 72.94081     | 2.40570      | 3.2806  |
| 2      | 21.535        | BB   | 0.7966      | 2150.43115   | 41.36130     | 96.7194 |

```
Totals :                2223.37196   43.76700
```

```

=====
*** End of Report ***
  
```

Sample Name: YH-18-101-3-EE

```

=====
Acq. Operator   : SYSTEM                      Seq. Line :   35
Acq. Instrument : HPLC1260                   Location  : P1-A2
Injection Date  : 11/19/2020 2:18:25 AM      Inj       :    1
                                           Inj Volume: 3.000 µl
Different Inj Volume from Sample Entry! Actual Inj Volume : 5.000 µl
Acq. Method     : E:\DATA\20201027\LC 2020-11-18 10-58-39\201PA_50_10_3.M
Last changed    : 11/18/2020 8:24:13 PM by SYSTEM
Analysis Method : E:\DATA\20201027\LC 2020-11-18 10-58-39\201PA_50_10_3.M (Sequence Method)
Last changed    : 1/20/2022 10:14:52 AM by SYSTEM
                 (modified after loading)
Additional Info : Peak(s) manually integrated
  
```

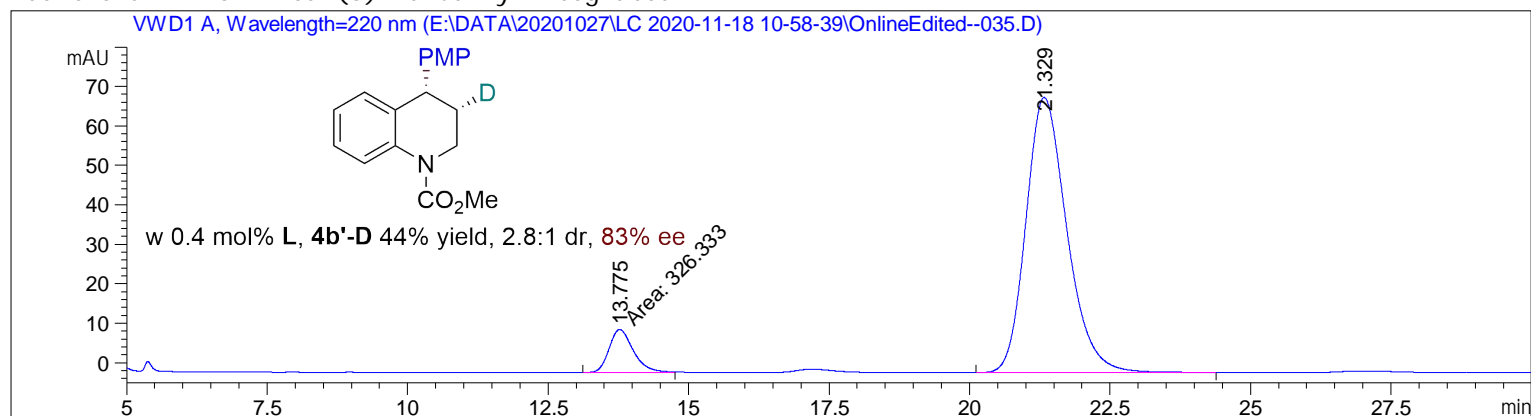

```

=====
                          Area Percent Report
=====
  
```

```

Sorted By      :      Signal
Multiplier     :      1.0000
Dilution      :      1.0000
Do not use Multiplier & Dilution Factor with ISTDs
  
```

Signal 1: VWD1 A, Wavelength=220 nm

| Peak # | RetTime [min] | Type | Width [min] | Area [mAU*s] | Height [mAU] | Area %  |
|--------|---------------|------|-------------|--------------|--------------|---------|
| 1      | 13.775        | MF   | 0.4988      | 326.33282    | 10.90301     | 8.4664  |
| 2      | 21.329        | BB   | 0.7763      | 3528.12524   | 69.72406     | 91.5336 |

```
Totals :                      3854.45807   80.62707
```

```

=====
*** End of Report ***
  
```

Sample Name: YH-18-101-2

```

=====
Acq. Operator   : SYSTEM                               Seq. Line :   39
Acq. Instrument : HPLC1260                             Location  : P1-F3
Injection Date  : 11/17/2020 5:17:32 AM                Inj       :    1
                                                    Inj Volume: 3.000 µl
Acq. Method     : E:\DATA\20201027\LC 2020-11-16 13-35-16\201PA_50_10_4.M
Last changed    : 11/16/2020 8:05:16 PM by SYSTEM
Analysis Method : E:\DATA\20201027\LC 2020-11-16 13-35-16\201PA_50_10_4.M (Sequence Method)
Last changed    : 1/20/2022 10:13:33 AM by SYSTEM
                  (modified after loading)
Additional Info : Peak(s) manually integrated
  
```

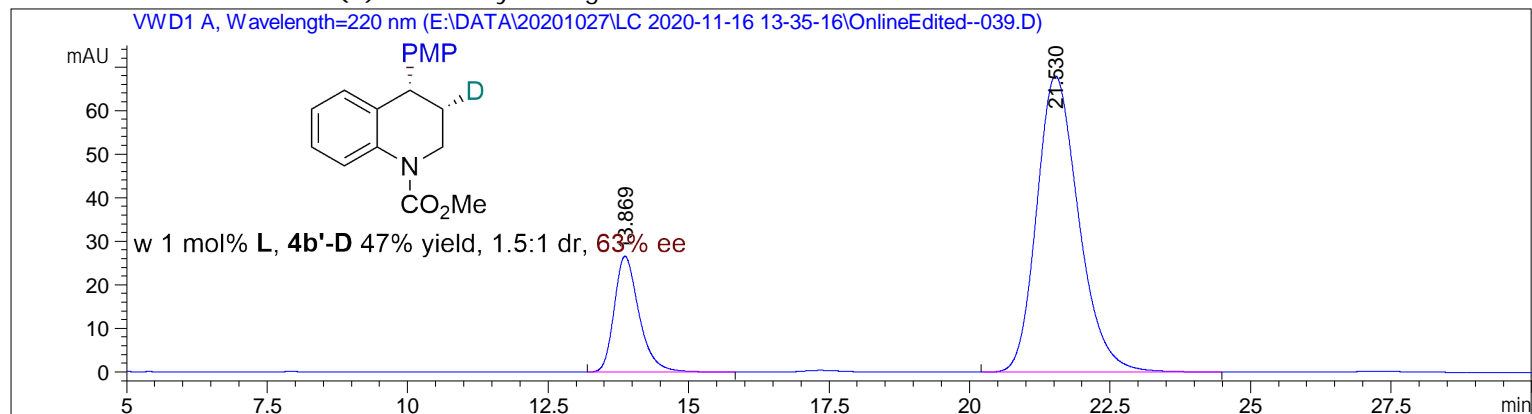

```

=====
                          Area Percent Report
=====
  
```

```

Sorted By      : Signal
Multiplier     : 1.0000
Dilution      : 1.0000
Do not use Multiplier & Dilution Factor with ISTDs
  
```

Signal 1: VWD1 A, Wavelength=220 nm

| Peak # | RetTime [min] | Type | Width [min] | Area [mAU*s] | Height [mAU] | Area %  |
|--------|---------------|------|-------------|--------------|--------------|---------|
| 1      | 13.869        | BB   | 0.4684      | 815.76105    | 26.55793     | 18.7263 |
| 2      | 21.530        | BB   | 0.7967      | 3540.47559   | 67.96634     | 81.2737 |

```
Totals :                4356.23663    94.52427
```

```

=====
*** End of Report ***
  
```

### 3. Supplementary References

1. He, Y., Liu, C., Yu, L. & Zhu, S. Enantio- and regioselective NiH-catalyzed reductive hydroarylation of vinylarenes with aryl iodides. *Angew. Chem. Int. Ed.* **59**, 21530–21534 (2020).
2. Do, H.-Q., Chandrashekar, E. R. R. & Fu, G. C. Nickel/bis(oxazoline)-catalyzed asymmetric Negishi arylations of racemic secondary benzylic electrophiles to generate enantioenriched 1,1-diarylalkanes. *J. Am. Chem. Soc.* **135**, 44, 16288–16291 (2013).
3. Frisch, M. J., Trucks, G. W., Schlegel, H. B., Scuseria, G. E., Robb, M. A., Cheeseman, J. R., Scalmani, G., Barone, V., Mennucci, B., Petersson, G. A., Nakatsuji, H., Caricato, M., Li, X., Hratchian, H. P., Izmaylov, A. F., Bloino, J., Zheng, G., Sonnenberg, J. L., Hada, M., Ehara, M., Toyota, K., Fukuda, R., Hasegawa, J., Ishida, M., Nakajima, T., Honda, Y., Kitao, O., Nakai, H., Vreven, T., Montgomery, J. A. Jr., Peralta, J. E., Ogliaro, F., Bearpark, M., Heyd, J. J., Brothers, E., Kudin, K. N., Staroverov, V. N., Keith, T., Kobayashi, R., Normand, J., Raghavachari, K., Rendell, A., Burant, J. C., Iyengar, S. S., Tomasi, J., Cossi, M., Rega, N., Millam, J. M., Klene, M., Knox, J. E., Cross, J. B., Bakken, V., Adamo, C., Jaramillo, J., Gomperts, R., Stratmann, R. E., Yazyev, O., Austin, A. J., Cammi, R., Pomelli, C., Ochterski, J. W., Martin, R. L., Morokuma, K., Zakrzewski, V. G., Voth, G. A., Salvador, P., Dannenberg, J. J., Dapprich, S., Daniels, A. D., Farkas, O., Foresman, J. B., Ortiz, J. V., Cioslowski, J. & Fox, D. J. Gaussian 09, Revision E.01. Gaussian, Inc., Wallingford CT, 2013.
4. Becke, A. D. Density-functional thermochemistry. III. the role of exact exchange. *J. Chem. Phys.* **98**, 5648–5652 (1993).
5. Lee, C., Yang, W. & Parr, R. G. Development of the Colle-Salvetti correlation-energy formula into a functional of the electron density. *Phys. Rev. B* **37**, 785–789 (1988).
6. Hay, P. J. & Wadt, W. R. Ab initio effective core potentials for molecular calculations - potentials for the transition-metal atoms Sc to Hg. *J. Chem. Phys.* **82**, 270–283 (1985).
7. Wadt, W. R. & Hay, P. J. Ab initio effective core potentials for molecular calculations - potentials for main group elements Na to Bi. *J. Chem. Phys.* **82**, 284–298 (1985).
8. Fukui, K. The path of chemical reactions - the IRC approach. *Acc. Chem. Res.* **14**, 363–368 (1981).



9. Zhao, Y. & Truhlar, D. G. The M06 suite of density functionals for main group thermochemistry, thermochemical kinetics, noncovalent interactions, excited states, and transition elements: two new functionals and systematic testing of four M06-class functionals and 12 other functionals. *Theor. Chem. Acc.* **120**, 215–241 (2008).
10. Dolg, M., Wedig, U., Stoll, H. & Preuss, H. Energy-adjusted ab initio pseudopotentials for the 1st-row transition-elements. *J. Chem. Phys.* **86**, 866-872 (1987).
11. Bergner, A., Dolg, M., Kuchle, W., Stoll, H. & Preuss, H. Ab-initio energy-adjusted pseudopotentials for elements of groups 13-17. *Mol. Phys.* **80**, 1431–1441 (1993).
12. Marenich, A. V., Cramer, C. J. & Truhlar, D. G. Universal solvation model based on solute electron density and on a continuum model of the solvent defined by the bulk dielectric constant and atomic surface tensions. *J. Phys. Chem. B* **113**, 6378–6396 (2009).
13. Rosenfarb, J., Huffman, H. L. Jr. & Caruso, J. A. Dielectric constants, viscosities, and related physical properties of several substituted liquid ureas at various temperatures. *J. Chem. Eng. Data* **21**, 150–153 (1976).
