# Supplementary material for: Regio- and enantioselective remote hydroarylation using a ligand-relay strategy
Source: PubMed Central journal article supplement (PMC9072428; doi:10.1038/s41467-022-30006-2), 2022-05-05
Supplement: 41467_2022_30006_MOESM3_ESM.pdf [file 41467_2022_30006_MOESM3_ESM.pdf]

## Description of Additional Supplementary files

File name: Supplementary Data 1

Description: Computational study of the asymmetric remote hydroarylation
